# Supplementary material for: Postnatal cardiomyocyte growth and mitochondrial reorganization cause multiple changes in the proteome of human cardiomyocytes
Source: Royal Society of Chemistry journal article supplement (doi:10.1039/c3mb25556e), 2013-02-20
Supplement: c3mb25556e.xlsx [file c3mb25556e.xlsx]

## Sheet: Sheet1
S-Table 1
Mitokarta proteins detected in FASP analysis but excluded from the mitochondrial preparation
Uniprot	Protein Names	Gene Names
P30566	Adenylosuccinate lyase;Adenylosuccinase;cDNA FLJ59367, highly similar to Adenylosuccinate lyase (EC 4.3.2.2);cDNA FLJ53891, highly similar to Adenylosuccinate lyase (EC 4.3.2.2)	ADSL;AMPS
Q14318	FK506-binding protein 8;Peptidyl-prolyl cis-trans isomerase;38 kDa FK506-binding protein;FKBPR38;cDNA, FLJ93891, Homo sapiens FK506 binding protein 8, 38kDa (FKBP8), mRNA	FKBP8;FKBP38
P35754	Glutaredoxin-1;Thioltransferase-1;Glutaredoxin (Thioltransferase), isoform CRA_c;cDNA, FLJ92134, Homo sapiens glutaredoxin (thioltransferase) (GLRX), mRNA	GLRX;GRX;hCG_36838
P21695	Glycerol-3-phosphate dehydrogenase [NAD+], cytoplasmic;cDNA, FLJ92881, highly similar to Homo sapiens glycerol-3-phosphate dehydrogenase 1 (soluble) (GPD1), mRNA;cDNA FLJ57375, highly similar to Glycerol-3-phosphate dehydrogenase	GPD1
P14324	Farnesyl pyrophosphate synthetase;Farnesyl diphosphate synthetase;Dimethylallyltranstransferase;Geranyltranstransferase;Farnesyl pyrophosphate synthetase like-4 protein	FDPS;FPS;KIAA1293
Q53H82	Beta-lactamase-like protein 2;cDNA FLJ76011, highly similar to Homo sapiens lactamase, beta 2 (LACTB2), mRNA	LACTB2;CGI-83
Q9P0U1	Mitochondrial import receptor subunit TOM7 homolog;Translocase of outer membrane 7 kDa subunit homolog;TOMM7 protein;Translocase of outer mitochondrial membrane 7 homolog (Yeast);Putative uncharacterized protein TOM7;Translocase of outer mitochondrial membrane 7 homolog (Yeast), isoform CRA_b;Putative uncharacterized protein TOMM7;Translocase of outer mitochondrial membrane 7 homolog (Yeast), iso…	TOMM7;TOM7;TOMM07;AD-014;hCG_1659575
Q8N6M3	Fat storage-inducing transmembrane protein 2;Fat-inducing protein 2	FITM2;C20orf142;FIT2
P53396	ATP-citrate synthase;ATP-citrate (pro-S-)-lyase;Citrate cleavage enzyme;cDNA FLJ56442, highly similar to ATP-citrate synthase (EC 2.3.3.8);cDNA FLJ55447, highly similar to ATP-citrate synthase (EC 2.3.3.8);ACLY variant protein;cDNA FLJ37765 fis, clone BRHIP2024742, highly similar to ATP-CITRATE	ACLY;ACLY variant protein
P18859	ATP synthase-coupling factor 6, mitochondrial;ATP synthase, H+ transporting, mitochondrial F0 complex, subunit F6, isoform CRA_b;ATP5J protein;Proliferation-inducing protein 36;cDNA, FLJ92165, Homo sapiens ATP synthase, H+ transporting, mitochondrial F0complex, subunit F6 (ATP5J), nuclear gene encoding mitochondrialprotein, mRNA;ATP synthase, H+ transporting, mitochondrial F0 complex, subunit F6;…	ATP5J;ATP5A;ATPM;hCG_2007844
P14621	Acylphosphatase-2;Acylphosphate phosphohydrolase 2;Acylphosphatase, muscle type isozyme;Putative uncharacterized protein ACYP2;Acylphosphatase	ACYP2;ACYP
Q8N8N7	Prostaglandin reductase 2;15-oxoprostaglandin 13-reductase;Zinc-binding alcohol dehydrogenase domain-containing protein 1	PTGR2;ZADH1
P02794	Ferritin heavy chain;Cell proliferation-inducing gene 15 protein;Ferritin	FTH1;FTH;FTHL6;OK/SW-cl.84;PIG15;hCG_1776129
Q9Y5J7	Mitochondrial import inner membrane translocase subunit Tim9;Translocase of inner mitochondrial membrane 9 homolog (Yeast), isoform CRA_a;cDNA, FLJ92376, Homo sapiens translocase of inner mitochondrial membrane 9 homolog(yeast) (TIMM9), mRNA	TIMM9;TIM9;TIM9A;TIMM9A;hCG_22226
Q9NZL9	Methionine adenosyltransferase 2 subunit beta;Methionine adenosyltransferase II beta;Methionine adenosyltransferase 2 beta subunit;DTDP-4-keto-6-deoxy-D-glucose 4-reductase;cDNA FLJ76904, highly similar to Homo sapiens methionine adenosyltransferase II, beta (MAT2B), transcript variant 2, mRNA;Methionine adenosyltransferase II, beta, isoform CRA_a;cDNA, FLJ92687, Homo sapiens methionine adenosylt…	MAT2B;TGR;MSTP045;Nbla02999;UNQ2435/PRO4995;hCG_37711
Q9BQC6	Ribosomal protein 63, mitochondrial;hMRP63;Mitochondrial ribosomal protein 63;Mitochondrial ribosomal protein 63, isoform CRA_a	MRP63;RP11-101P17.4-001;hCG_1774334
O94760	N(G),N(G)-dimethylarginine dimethylaminohydrolase 1;DDAHI;Dimethylargininase-1;Dimethylarginine dimethylaminohydrolase 1;Dimethylarginine dimethylaminohydrolase 1, isoform CRA_b;cDNA, FLJ92778, Homo sapiens dimethylarginine dimethylaminohydrolase 1 (DDAH1), mRNA;cDNA FLJ54083, highly similar to NG,NG-dimethylarginine dimethylaminohydrolase 1 (EC 3.5.3.18);cDNA FLJ54119, highly similar to NG,NG-di…	DDAH1;DDAH;RP4-621F18.1-001;hCG_2040048;DKFZp686N2176
P56277	Protein p8 MTCP-1;Mature T-cell proliferation-1 type A;Mature T-cell proliferation 1 neighbor;Mature T-cell proliferation 1, isoform CRA_a	MTCP1;C6.1B;MTCP1B;GS1-273L24.5-001;hCG_1640796
Q16881	Thioredoxin reductase 1, cytoplasmic;Thioredoxin reductase TR1;KM-102-derived reductase-like factor;Gene associated with retinoid-IFN-induced mortality 12 protein;cDNA FLJ46672 fis, clone TRACH3009008, highly similar to Thioredoxin reductase (EC 1.6.4.5);cDNA, FLJ92557, highly similar to Homo sapiens thioredoxin reductase 1 (TXNRD1), mRNA	TXNRD1;KDRF
Q9BWD1	Acetyl-CoA acetyltransferase, cytosolic;Cytosolic acetoacetyl-CoA thiolase;Acetyl-CoA transferase-like protein;cDNA FLJ76813, highly similar to Homo sapiens acetyl-Coenzyme A acetyltransferase 2 (acetoacetyl Coenzyme A thiolase), mRNA;Acetyl-CoA acetyltransferase, cytosolic variant	ACAT2;ACTL
P55957	BH3-interacting domain death agonist;p22 BID;BH3-interacting domain death agonist p15;p15 BID;BH3-interacting domain death agonist p13;p13 BID;BH3-interacting domain death agonist p11;p11 BID;cDNA FLJ37476 fis, clone BRAWH2012827, highly similar to Homo sapiens BH3 interacting domain death agonist (BID), transcript variant 1, mRNA;Desmocollin type 4;BH3 interacting domain death agonist, isoform C…	BID;hCG_21529
O43504	Hepatitis B virus X-interacting protein	HBXIP;XIP
B1AK40	Fumarylacetoacetate hydrolase domain containing 1;Fumarylacetoacetate hydrolase domain-containing protein 1;YISK-like	FAHD1;AC012180.10-003;C16orf36;YISKL
Q9Y5P6	Mannose-1-phosphate guanyltransferase beta;GTP-mannose-1-phosphate guanylyltransferase beta;GDP-mannose pyrophosphorylase B	GMPPB
Q9Y6H1	Coiled-coil-helix-coiled-coil-helix domain-containing protein 2, mitochondrial;HCV NS2 trans-regulated protein;Aging-associated gene 10 protein;Coiled-coil-helix-coiled-coil-helix domain-containing protein 9, mitochondrial	CHCHD2;C7orf17;AAG10;CHCHD9;C9orf49
P15502	Elastin;Tropoelastin;cDNA FLJ43523 fis, clone PLACE5000282, weakly similar to Homo sapiens elastin (supravalvular aortic stenosis, Williams-Beuren syndrome) (ELN);cDNA PSEC0191 fis, clone HEMBA1000446, moderately similar to ELASTIN;cDNA FLJ36819 fis, clone ASTRO2005575, highly similar to Elastin;cDNA FLJ56005, highly similar to Elastin;cDNA PSEC0254 fis, clone NT2RP3003474, moderately similar to …	ELN;hCG_18037
Q9BW72	HIG1 domain family member 2A	HIGD2A
Q9Y5L4	Mitochondrial import inner membrane translocase subunit Tim13	TIMM13;TIM13B;TIMM13A;TIMM13B
P21549	Serine--pyruvate aminotransferase;Alanine--glyoxylate aminotransferase;Alanine:glyoxylate aminotransferase;cDNA, FLJ96371, highly similar to Homo sapiens alanine-glyoxylate aminotransferase (oxalosis I; hyperoxaluria I; glycolicaciduria; serine-pyruvate aminotransferase) (AGXT), mRNA;Alanine-glyoxylate aminotransferase;cDNA FLJ77951, highly similar to Human peroxisomal L-alanine:glyoxylate aminot…	AGXT;AGT1;SPAT;hCG_19250
P00480	Ornithine carbamoyltransferase, mitochondrial;Ornithine transcarbamylase;cDNA FLJ75978, highly similar to Homo sapiens ornithine carbamoyltransferase (OTC), mRNA;Ornithine carbamoyltransferase, isoform CRA_a	OTC;hCG_18325
P34896	Serine hydroxymethyltransferase, cytosolic;Glycine hydroxymethyltransferase;Serine hydroxymethyltransferase;Putative uncharacterized protein SHMT1;Cytosolic serine hydroxymethyltransferase;cDNA FLJ60988, highly similar to Serine hydroxymethyltransferase, cytosolic (EC 2.1.2.1)	SHMT1;hCG_1985219;SHMT
Q9UG56	Phosphatidylserine decarboxylase proenzyme;Phosphatidylserine decarboxylase alpha chain;Phosphatidylserine decarboxylase beta chain;Phosphatidylserine decarboxylase;Phosphatidylserine decarboxylase, isoform CRA_a;cDNA FLJ60772, highly similar to Homo sapiens phosphatidylserine decarboxylase (PISD), mRNA	PISD;RP5-858B16.2-007;hCG_2010605;RP5-858B16.2-006;RP5-858B16.2-012;RP5-858B16.2-004;RP5-858B16.2-014;RP5-858B16.2-009
P55039	Developmentally-regulated GTP-binding protein 2;Developmentally regulated GTP binding protein 2, isoform CRA_a;cDNA, FLJ93890, Homo sapiens developmentally regulated GTP binding protein 2 (DRG2), mRNA;Developmentally regulated GTP binding protein 2;Putative uncharacterized protein DRG2;Developmentally regulated GTP binding protein 2 variant;cDNA FLJ52694, moderately similar to Developmentally-reg…	DRG2;hCG_1986077
Q3SY69	Probable 10-formyltetrahydrofolate dehydrogenase ALDH1L2;Aldehyde dehydrogenase family 1 member L2;cDNA FLJ52076, highly similar to Homo sapiens aldehyde dehydrogenase 1 family, member L2 (ALDH1L2), mRNA	ALDH1L2
Q7Z4H3	HD domain-containing protein 2;Hepatitis C virus NS5A-transactivated protein 2;Putative uncharacterized protein HDDC2	HDDC2;C6orf74;NS5ATP2;CGI-130
Q709F0	Acyl-CoA dehydrogenase family member 11;ACAD11 protein;cDNA FLJ59005, highly similar to Homo sapiens acyl-CoA dehydrogenase, mRNA	ACAD11
Q9NRF8	CTP synthase 2;UTP--ammonia ligase 2;CTP synthetase 2;cDNA FLJ43342 fis, clone NT2RI3007978, highly similar to CTP synthase 2 (EC 6.3.4.2);cDNA FLJ43358 fis, clone NT2RP7014005, highly similar to CTP synthase 2 (EC 6.3.4.2);CTP synthase II, isoform CRA_a;cDNA: FLJ22001 fis, clone HEP06629	CTPS2;hCG_1640699
P21964	Catechol O-methyltransferase;COMT protein	COMT
Q6L8Q7	2',5'-phosphodiesterase 12	PDE12
Q96AG3	Solute carrier family 25 member 46;cDNA FLJ75619;Putative uncharacterized protein LOC91137;cDNA FLJ34108 fis, clone FCBBF3008251, highly similar to Human TB1 gene mRNA;cDNA FLJ56268;cDNA FLJ60882;Putative uncharacterized protein SLC25A46	SLC25A46;TB1;LOC91137;hCG_37444
Q9BUK0	Coiled-coil-helix-coiled-coil-helix domain-containing protein 7;Coiled-coil-helix-coiled-coil-helix domain containing 7, isoform CRA_a;cDNA FLJ76528, highly similar to Homo sapiens coiled-coil-helix-coiled-coil-helix domain containing7 (CHCHD7), mRNA	CHCHD7;hCG_40757
P49753	Acyl-coenzyme A thioesterase 2, mitochondrial;Acyl-coenzyme A thioester hydrolase 2a;Long-chain acyl-CoA thioesterase 2;ZAP128;CTE-Ia;Acyl-CoA thioesterase 1	ACOT2;PTE2;PTE2A;ACOT1
Q4VC31	Coiled-coil domain-containing protein 58	CCDC58
P09110	3-ketoacyl-CoA thiolase, peroxisomal;Beta-ketothiolase;Acetyl-CoA acyltransferase;Peroxisomal 3-oxoacyl-CoA thiolase;cDNA FLJ55549, highly similar to 3-ketoacyl-CoA thiolase, peroxisomal (EC 2.3.1.16);3-oxoacyl-CoA thiolase;ACAA1 protein;cDNA FLJ61196, highly similar to 3-ketoacyl-CoA thiolase, peroxisomal (EC 2.3.1.16)	ACAA1;ACAA;PTHIO
P56134	ATP synthase subunit f, mitochondrial;ATP synthase, H+ transporting, mitochondrial F0 complex, subunit f isoform 2a variant;ATP synthase, H+ transporting, mitochondrial F0 complex, subunit F2;ATP synthase, H+ transporting, mitochondrial F0 complex, subunit f, isoform 2;ATP5J2 protein;Putative uncharacterized protein ATP5J2	ATP5J2;ATP5JL;hCG_2023419;tcag7.652
P10599	Thioredoxin;ATL-derived factor;Surface-associated sulphydryl protein;Surface-associated sulphydryl protein, SASP=THIOREDOXIN homolog;Thioredoxin, isoform CRA_b;Thioredoxin delta 3	TXN;TRDX;TRX;TRX1;RP11-427L11.1-002;hCG_28763;TXN delta 3
Q13085	Acetyl-CoA carboxylase 1;ACC-alpha;Biotin carboxylase;Acetyl-Coenzyme A carboxylase alpha;HCG30204, isoform CRA_b;cDNA FLJ52591, highly similar to Acetyl-CoA carboxylase 1 (EC 6.4.1.2);cDNA FLJ52592, highly similar to Acetyl-CoA carboxylase 1 (EC 6.4.1.2);cDNA FLJ50410, highly similar to Acetyl-CoA carboxylase 1 (EC 6.4.1.2);cDNA FLJ54634, highly similar to Acetyl-CoA carboxylase 1 (EC 6.4.1.2);c…	ACACA;ACAC;ACC1;ACCA;hCG_30204
Q86TS9	39S ribosomal protein L52, mitochondrial;cDNA FLJ76418, highly similar to Homo sapiens mitochondrial ribosomal protein L52 (MRPL52), transcript variant 1, mRNA;Mitochondrial ribosomal protein L52, isoform CRA_d;Putative uncharacterized protein MRPL52	MRPL52
Q9H0N5	Pterin-4-alpha-carbinolamine dehydratase 2;4-alpha-hydroxy-tetrahydropterin dehydratase 2;DcoH-like protein DCoHm;Dimerization cofactor of hepatocyte nuclear factor 1 from muscle;HNF-1-alpha dimerization cofactor	PCBD2;DCOH2;DCOHM
A6NFH1	Putative uncharacterized protein GTPBP3;tRNA modification GTPase GTPBP3, mitochondrial;GTP-binding protein 3;Mitochondrial GTP-binding protein 1;cDNA FLJ77430, highly similar to Homo sapiens GTP binding protein 3 (GTPBP3), transcript variant V, mRNA;GTP binding protein 3 (Mitochondrial), isoform CRA_a;GTPBP3 protein	GTPBP3;MTGP1;hCG_37654
Q969P6	DNA topoisomerase I, mitochondrial;TOP1mt;cDNA FLJ50294, highly similar to DNA topoisomerase I, mitochondrial (EC 5.99.1.2);TOP1MT protein	TOP1MT
Q969V5	Mitochondrial ubiquitin ligase activator of NFKB 1;E3 ubiquitin-protein ligase MUL1;Growth inhibition and death E3 ligase;Putative NF-kappa-B-activating protein 266;Mitochondrial-anchored protein ligase;RING finger protein 218;cDNA FLJ52155, moderately similar to Rattus norvegicus ring finger protein 34 (Rnf34), mRNA	MUL1;C1orf166;GIDE;MAPL;MULAN;RNF218
Q8IYU8	EF-hand domain-containing family member A1	EFHA1
Q9NRP4	Protein ACN9 homolog, mitochondrial;ACN9 homolog (S. cerevisiae);ACN9 homolog (S. cerevisiae), isoform CRA_b	ACN9;DC11;hCG_39015;tcag7.1128
