# Supplementary material for: Postnatal cardiomyocyte growth and mitochondrial reorganization cause multiple changes in the proteome of human cardiomyocytes
Source: Royal Society of Chemistry journal article supplement (doi:10.1039/c3mb25556e), 2013-02-20
Supplement: c3mb25556e_2.xlsx [file c3mb25556e_2.xlsx]

## Sheet: Sheet1
Protein Names	Gene Names	Uniprot	relative mean fetus	relative mean adult	sd fetus	sd adult	TTEST p-value (Fetus:Adult)		Uniprot 6-digit					Fig.4A	t-test p-value
Cdc42 effector protein 1;Binder of Rho GTPases 5;Serum protein MSE55;cDNA FLJ76678, highly similar to Homo sapiens CDC42 effector protein (Rho GTPase binding) 1, transcript variant 2, mRNA;CDC42 effector protein (Rho GTPase binding) 1, isoform CRA_a;CDC42 effector protein (Rho GTPase binding) 1	CDC42EP1;BORG5;CEP1;MSE55;hCG_41837;RP5-1177I5.4-002	Q00587-1;Q00587;Q00587-2;A8K825;B0QYC8	1	0	0.00262294	0	1.14663e-06		Q00587					CKMT2	0.00726048
Nuclear pore complex protein Nup93;Nucleoporin Nup93;93 kDa nucleoporin;cDNA FLJ78686, highly similar to Homo sapiens nucleoporin 93kDa (NUP93), mRNA;cDNA FLJ32075 fis, clone OCBBF1000146, highly similar to Nuclear pore complex protein Nup93;cDNA FLJ58756, highly similar to Nuclear pore complex protein Nup93	NUP93;KIAA0095	Q8N1F7;A8K897;B3KPQ8	1	0	0.0183189	0	5.59212e-05		Q8N1F7					TOMM22	0.00151897
Sorbin and SH3 domain-containing protein 1;Ponsin;c-Cbl-associated protein;SH3 domain protein 5;SH3P12;Sorbin and SH3 domain containing 1;Putative uncharacterized protein SORBS1	SORBS1;KIAA0894;KIAA1296;SH3D5;RP11-476E15.1-005;RP11-476E15.1-008;RP11-476E15.1-009	Q9BX66-1;Q9BX66;A0AED4;Q9BX66-2;Q5T931;Q9BX66-5;Q5T927;Q9BX66-8;Q5T932	1	1.88914	0.238373	0.23194	0.00013062		Q9BX66					HADHA	0.0917567
Coronin-1C;Coronin-3;Coronin-1C_i2 protein;Coronin-1C_i3 protein;cDNA FLJ13143 fis, clone NT2RP3003230, highly similar to Coronin-1C;cDNA FLJ39044 fis, clone NT2RP7010275, highly similar to Coronin-1C;Coronin, actin binding protein, 1C, isoform CRA_a;cDNA FLJ51205, highly similar to Coronin-1C;cDNA, FLJ79403, highly similar to Coronin-1C;Coronin, actin binding protein, 1C variant;cDNA FLJ50992, h…	CORO1C;CRNN4;hCG_15695	Q9ULV4;A7MAP0;A7MAP1;B3KN06;B3KU12;B4E3S0;Q53G58;Q59EA2;B4DMH3	1	0.110043	0.169685	0.1906	0.000155334		Q9ULV4					MRPL11	0.02271
DNA topoisomerase 2-beta;DNA topoisomerase II, beta isozyme;Topoisomerase IIb;DNA topoisomerase 2;cDNA FLJ50986, highly similar to DNA topoisomerase 2-beta (EC 5.99.1.3);DNA topoisomerase II, beta isozyme variant;DNA topoisomerase II beta;Topoisomerase II beta;Antigen MLAA-44;Putative uncharacterized protein	TOP2B;topIIb;top2beta	Q02880-1;Q02880;Q6LBI8;Q02880-2;B4DKD0;B4DLV2;Q59H80;Q6LC06;Q6W6M6;Q71UH4;Q8WTY5	1	0	0.0339957	0	0.000192507		Q02880					MRPL12	0.0440615
DNA-(apurinic or apyrimidinic site) lyase;Apurinic-apyrimidinic endonuclease 1;APEX nuclease;Protein REF-1;APEX nuclease (Multifunctional DNA repair enzyme) 1;Full-length cDNA clone CS0DI036YP02 of Placenta of Homo sapiens (human);cDNA FLJ76713, highly similar to Homo sapiens APEX nuclease (multifunctional DNA repair enzyme) 1 (APEX1), transcript variant 2, mRNA;APEX nuclease (Multifunctional DNA…	APEX1;APE;APEX;APX;HAP1;REF1;hCG_40473	P27695;Q5TZP7	1	0.160871	0.0575094	0.0361755	0.000256084		P27695					NDUFS1	0.00325314
Filamin-binding LIM protein 1;Mitogen-inducible 2-interacting protein;Migfilin	FBLIM1;FBLP1	Q8WUP2-1;Q8WUP2;Q8WUP2-2;Q8WUP2-3	1	0.27714	0.275892	0.280006	0.000261755		Q8WUP2					MT-ND4	0.00773456
Proliferating cell nuclear antigen;Cyclin	PCNA;hCG_39115	P12004;B2R897;B4DUA2;Q6FHF5;Q6FI35;Q7Z6A1;Q7Z6A2;Q7Z6A3	1	0	0.0403384	0	0.000270978		P12004					ATP5F1	0.0470198
Adenylosuccinate lyase;Adenylosuccinase;cDNA FLJ59367, highly similar to Adenylosuccinate lyase (EC 4.3.2.2);cDNA FLJ53891, highly similar to Adenylosuccinate lyase (EC 4.3.2.2)	ADSL;AMPS	P30566-1;P30566;B4DP46;B4DUM2;Q71UA4	1	0.178607	0.224006	0.203204	0.000304409		P30566					ACADVL	0.0231553
Creatine kinase, sarcomeric mitochondrial;S-MtCK;Basic-type mitochondrial creatine kinase;Mib-CK;cDNA, FLJ93805, highly similar to Homo sapiens creatine kinase, mitochondrial 2 (sarcomeric) (CKMT2), nuclear gene encoding mitochondrial protein, mRNA;cDNA FLJ16309 fis, clone SKMUS2007816, highly similar to Creatine kinase, sarcomeric mitochondrial (EC 2.7.3.2)	CKMT2	P17540;B2R8A3;B3KVA7	1	3.84787	0.332004	0.400185	0.000327826		P17540					TFAM	0.499512
Acidic leucine-rich nuclear phosphoprotein 32 family member A;Potent heat-stable protein phosphatase 2A inhibitor I1PP2A;Acidic nuclear phosphoprotein pp32;Leucine-rich acidic nuclear protein;Putative HLA-DR-associated protein I;Mapmodulin;ANP32A protein;Hepatopoietin PCn127	ANP32A;C15orf1;LANP;MAPM;PHAP1	P39687;Q08AJ6;Q3KPI8;Q6PKH8;Q1AHP8	1	0.124492	0.0547864	0.0391679	0.00033929		P39687					ANT1	0.109088
Putative uncharacterized protein RPL7P23;Putative uncharacterized protein RPL7;60S ribosomal protein L7;cDNA FLJ78488, highly similar to Homo sapiens ribosomal protein L7 (RPL7), mRNA;cDNA, FLJ93893, Homo sapiens ribosomal protein L7 (RPL7), mRNA;Putative uncharacterized protein ENSP00000260536;Similar to 60S ribosomal protein L7; similar to P18124 (PID:d133021)	RPL7P23;RPL7;WUGSC:H_RG054D04.1	A8MY04;A8MVV7;P18124;A8K504;B6ZDM1;A8MUD9;O95036	1	0.194729	0.0459236	0.0222135	0.000353382		A8MY04
Neutral alpha-glucosidase AB;Glucosidase II subunit alpha;Alpha-glucosidase 2;cDNA FLJ59643, highly similar to Neutral alpha-glucosidase AB;cDNA FLJ54035, highly similar to Neutral alpha-glucosidase AB;cDNA FLJ61290, highly similar to Neutral alpha-glucosidase AB;cDNA FLJ54057, highly similar to Neutral alpha-glucosidase AB	GANAB;G2AN;KIAA0088	Q14697-2;Q14697;B4DZ53;Q14697-1;B4DIW2;B4DJ30;B4DSM6;Q14697-3	1	0.344708	0.0515972	0.0439252	0.000395984		Q14697					S-Fig. 1A	t-test p-value
ATP-dependent RNA helicase A;Nuclear DNA helicase II;DEAH box protein 9;DEAH (Asp-Glu-Ala-His) box polypeptide 9;DEAH (Asp-Glu-Ala-His) box polypeptide 9, isoform CRA_b;cDNA FLJ39263 fis, clone OCBBF2009571, highly similar to ATP-dependent RNA helicase A (EC 3.6.1.-);DHX9 protein;Leukophysin (ATP-dependent RNA helicase A)	DHX9;DDX9;LKP;NDH2;hCG_24396	Q08211;B2RNV4;B3KU66;Q05CI5;Q12803;Q32Q22;Q58F26;Q6PJK6	1	0.136762	0.0559127	0.0200388	0.000429858		Q08211					ANP32A	0.00033929
Hemoglobin subunit epsilon;Hemoglobin epsilon chain;Epsilon-globin;HBE1 protein;Hemoglobin, epsilon 1;Putative uncharacterized protein HBE1	HBE1;HBE;hCG_1640999	P02100;Q6FH44;A8MUF7	1	0	0.0511248	0	0.000435055		P02100					HNRNPU	0.0923302
Tubulin beta-2C chain;Tubulin beta-2 chain;cDNA, FLJ93005, highly similar to Homo sapiens tubulin, beta polypeptide (TUBB), mRNA;Class IVb beta tubulin;Tubulin, beta 2C;TUBB2C protein;Tubulin beta 2C;cDNA FLJ11352 fis, clone HEMBA1000020, highly similar to Tubulin beta-2C chain	TUBB2C	P68371;B2R6L0;Q8IWP6;Q8IZ29;Q8N6N5;Q96HX0;A4UCT2;B3KML9	1	0.3062	0.0608192	0.0603304	0.000455014		P68371					RUVBL1	0.00220788
Myosin-7;Myosin heavy chain 7;Myosin heavy chain, cardiac muscle beta isoform;Myosin heavy chain slow isoform;Myosin, heavy chain 7, cardiac muscle, beta;Myosin, heavy polypeptide 7, cardiac muscle, beta, isoform CRA_b;MYH7 protein;Mutant cardiac beta myosin heavy chain;Beta myosin heavy chain cardiac isoform;Mutant cardiac muscle beta-myosin heavy chain 7;Myosin heavy chain beta-subunit;Rhabdomy…	MYH7;MYHCB;hCG_41736	P12883;A2TDB6;A5YM51;A6N930;A6N931;A6N933;A8CLK2;A8CLL2;A8CLN2;B6D424;Q14905;Q2XUS2;Q59EV3;Q5GJ54;Q9UDA2	1	1.47991	0.205869	0.216523	0.000470157		P12883					ERH	0.0917567
Heterogeneous nuclear ribonucleoprotein H2;Heterogeneous nuclear ribonucleoprotein H';FTP-3;Heterogeneous nuclear ribonucleoprotein H2 (H');cDNA FLJ57964, highly similar to Heterogeneous nuclear ribonucleoprotein H'	HNRNPH2;FTP3;HNRPH2;hCG_1644446	P55795;A1L400;B4DFK9	1	0.118302	0.213061	0.204905	0.000474979		P55795					PCNA	0.000270978
Inter-alpha (Globulin) inhibitor H4 (Plasma Kallikrein-sensitive glycoprotein);Putative uncharacterized protein DKFZp686G21125;Inter-alpha-trypsin inhibitor heavy chain H4;Inter-alpha-trypsin inhibitor family heavy chain-related protein;Plasma kallikrein sensitive glycoprotein 120;70 kDa inter-alpha-trypsin inhibitor heavy chain H4;35 kDa inter-alpha-trypsin inhibitor heavy chain H4	ITIH4;DKFZp686G21125;IHRP;ITIHL1;PK120;PRO1851	B2RMS9;Q68DH2;Q14624-1;Q14624;Q14624-2	1	11.5216	0.728009	0.786755	0.000496366		B2RMS9					APEX1	0.000256084
Eukaryotic initiation factor 4A-I;ATP-dependent RNA helicase eIF4A-1;cDNA FLJ78614, highly similar to Homo sapiens eukaryotic translation initiation factor 4A, isoform 1 (EIF4A1), mRNA;cDNA FLJ78244, highly similar to Homo sapiens eukaryotic translation initiation factor 4A, isoform 1 (EIF4A1), mRNA;Eukaryotic translation initiation factor 4A, isoform 1, isoform CRA_b;cDNA, FLJ93014, Homo sapiens…	EIF4A1;DDX2A;EIF4A;hCG_43753	P60842;A8K088;A8K7F6;B2R6L8;B4DNH2;B4E047	1	0.174687	0.127353	0.152913	0.000501882		P60842					CLIC1	0.00079232
EMILIN-3;Elastin microfibril interface-located protein 3;EMILIN-5;Elastin microfibril interface-located protein 5;EMILIN3 protein	EMILIN3;C20orf130;EMILIN5	Q9NT22;Q495S5;Q495S7	1	0	0.0551158	0	0.000505525		Q9NT22					H3	0.00672147
L-lactate dehydrogenase A chain;LDH muscle subunit;Renal carcinoma antigen NY-REN-59;Cell proliferation-inducing gene 19 protein;L-lactate dehydrogenase;Putative uncharacterized protein LDHA	LDHA;PIG19	P00338-1;P00338;P00338-2;B4DJI1;B4DKQ2;A8MXQ4	1	0.208903	0.0689488	0.056193	0.000538348		P00338
FERM, RhoGEF and pleckstrin domain-containing protein 1;Chondrocyte-derived ezrin-like protein;FERM, RhoGEF (ARHGEF) and pleckstrin domain protein 1 (Chondrocyte-derived)	FARP1;CDEP;RP11-111L24.1-004	Q9Y4F1-2;Q9Y4F1;Q9Y4F1-1;Q5JV94	1	0	0.0577153	0	0.000554252		Q9Y4F1					S-Fig. 1B	t-test p-value
26S proteasome non-ATPase regulatory subunit 1;26S proteasome regulatory subunit RPN2;26S proteasome regulatory subunit S1;26S proteasome subunit p112;cDNA, FLJ92896, highly similar to Homo sapiens proteasome (prosome, macropain) 26S subunit, non-ATPase, 1 (PSMD1), mRNA;PSMD1 protein	PSMD1	Q99460-1;Q99460;B2R6D0;Q05BX4;Q05CW6;Q99460-2	1	0.451244	0.211	0.17953	0.000563323		Q99460					MYH7	0.101681
Dysferlin;Dystrophy-associated fer-1-like protein;Fer-1-like protein 1;Dysferlin variant	DYSF;FER1L1	O75923-8;O75923;O75923-2;O75923-10;O75923-4;O75923-14;O75923-1;O75923-13;O75923-7;O75923-11;O75923-5;O75923-12;O75923-6;A0FK00;O75923-9;O75923-3;Q7Z6P1;O75923-15	1	2.11442	0.0736909	0.113954	0.000592892		O75923					DYSF	0.000592892
Dolichyl-diphosphooligosaccharide--protein glycosyltransferase 48 kDa subunit;cDNA FLJ55714, highly similar to Dolichyl-diphosphooligosaccharide--protein glycosyltransferase 48 kDa subunit (EC 2.4.1.119);cDNA FLJ52929, highly similar to Dolichyl-diphosphooligosaccharide--proteinglycosyltransferase 48 kDa subunit (EC2.4.1.119)	DDOST;KIAA0115;OST48;OK/SW-cl.45	P39656;B2RDQ4;B4DLI2;Q5VWA5;B4DJE3	1	0.293689	0.0983902	0.0557015	0.000611457		P39656					ACTC1	0.00208656
U6 snRNA-associated Sm-like protein LSm4;Glycine-rich protein	LSM4	Q9Y4Z0	1	0	0.0606878	0	0.000612706		Q9Y4Z0					MYL4	0.0038673
Novel enoyl-CoA hydratase/isomerase family protein;Enoyl-CoA hydratase domain-containing protein 1;Uncharacterized hypothalamus protein HCDASE	RP3-351K20.2-016;ECHDC1;RP3-351K20.2-007;RP3-351K20.2-006	Q5TEF9;Q9NTX5-1;Q9NTX5;Q9NTX5-2;Q9NZ30;Q5TEG0;Q5TEF7	1	2.6444	0.523063	0.509935	0.000614734		Q5TEF9					MYL3	0.0172862
Splicing factor U2AF 35 kDa subunit;U2 auxiliary factor 35 kDa subunit;U2 snRNP auxiliary factor small subunit;U2 small nuclear RNA auxillary factor 1 isoform a;U2 small nuclear RNA auxiliary factor 1;Putative uncharacterized protein DKFZp313J1712;U2(RNU2) small nuclear RNA auxiliary factor 1, isoform CRA_b;Splicing factor U2AF 26 kDa subunit;U2 auxiliary factor 26;U2 small nuclear RNA auxiliary …	U2AF1;U2AF35;U2AFBP;DKFZp313J1712;hCG_401287;U2AF1L4;U2AF1-RS3;U2AF1L3	Q01081;B5BU08;Q7Z780;Q69YM7;Q701P4;Q8WU68-1;Q8WU68;Q8WU68-2;Q8WU68-3;Q71RF1	1	0	0.0620333	0	0.000640124		Q01081					TNNT2	0.048934
Eukaryotic translation initiation factor 3 subunit C;Eukaryotic translation initiation factor 3 subunit 8;eIF3 p110;Cell migration-inducing protein 17;cDNA FLJ30804 fis, clone FEBRA2001267, highly similar to Eukaryotic translation initiation factor 3 subunit 8;cDNA FLJ54488, highly similar to Eukaryotic translation initiation factor 3 subunit 8;cDNA FLJ55450, highly similar to Eukaryotic translat…	EIF3C;EIF3S8;EIF3CL	Q99613;A1KYQ7;B2RXG3;B3KNZ4;B4DDN4;B4DVQ5;B4E1D5;B4E2Z6;Q3B7B9;B5ME19;B4DVU3;B4DRU0	1	0.119983	0.0730858	0.121707	0.000653628		Q99613					TNNI1	0.0131886
Protein DEK;DEK oncogene (DNA binding), isoform CRA_a;cDNA, FLJ92998, Homo sapiens DEK oncogene (DNA binding) (DEK), mRNA;cDNA FLJ51914, highly similar to Protein DEK;cDNA FLJ53031, highly similar to Protein DEK;cDNA FLJ52337, highly similar to Protein DEK	DEK;hCG_36749	P35659;B2R6K6;B4DNW3;B4DFG0;B4DN37	1	0	0.0636546	0	0.000673952		P35659					TNNI3	0.0205137
Cytochrome c oxidase subunit 6C;Cytochrome c oxidase polypeptide VIc;Cytochrome c oxidase subunit VIc, isoform CRA_a;cDNA, FLJ92052, Homo sapiens cytochrome c oxidase subunit VIc (COX6C), mRNA	COX6C;hCG_1781497	P09669;B2R4D7	1	2.46646	0.132356	0.226024	0.000693686		P09669
Eukaryotic translation initiation factor 3 subunit F;Eukaryotic translation initiation factor 3 subunit 5;eIF-3-epsilon;eIF3 p47;cDNA FLJ36192 fis, clone TESTI2027450, highly similar to Eukaryotic translation initiation factor 3 subunit 5;HCG1784554, isoform CRA_a;cDNA FLJ52478, highly similar to Eukaryotic translation initiation factor 3 subunit 5;cDNA FLJ52696, highly similar to Eukaryotic tran…	EIF3F;EIF3S5;hCG_1784554	O00303;B3KSH1;B4DEW9;B4DMT5	1	0.0636394	0.16213	0.110227	0.00072934		O00303					S-Fig. 1C	t-test p-value
Eukaryotic translation elongation factor 1 epsilon-1;Multisynthetase complex auxiliary component p18;Elongation factor p18	EEF1E1;AIMP3;P18	O43324	1	0.0621907	0.169002	0.107717	0.000743715		O43324					GFAT	0.125042
Blood vessel epicardial substance;Popeye domain-containing protein 1;cDNA FLJ76002, highly similar to Homo sapiens blood vessel epicardial substance (BVES), transcriptvariant A, mRNA;HCG2039558, isoform CRA_a	BVES;POP1;POPDC1;RP3-522O2.1-001;hCG_2039558	Q8NE79;A8K1R4;Q5T551	1	0.029692	0.0983096	0.0514281	0.000751824		Q8NE79					GLUT1	0.0249099
Nuclear pore complex protein Nup205;Nucleoporin Nup205;205 kDa nucleoporin;Nucleoporin 205kDa, isoform CRA_a;Nucleoporin 205kDa;cDNA FLJ50078, highly similar to Nuclear pore complex protein Nup205;NUP205 protein	NUP205;C7orf14;KIAA0225;hCG_1811087	Q92621;A6H8X3;B4DE72;Q4VBX7;Q6DKH1;Q6P486	1	0	0.067427	0	0.000756015		Q92621					GSK3B	0.120584
Heterogeneous nuclear ribonucleoprotein U (Scaffold attachment factor A);HNRPU protein;Heterogeneous nuclear ribonucleoprotein U;Scaffold attachment factor A;p120;pp120;cDNA FLJ54020, highly similar to Heterogeneous nuclear ribonucleoprotein U;cDNA FLJ44920 fis, clone BRAMY3011501, highly similar to Heterogeneous nuclear ribonucleoprotein U;Putative uncharacterized protein;Heterogeneous nuclear r…	HNRNPU;RP11-11N7.3-002;HNRPU;SAFA;U21.1;RP11-11N7.3-003;RP11-11N7.3-004;hCG_22289	Q5RI17;Q96BA7;Q00839-1;Q00839;Q00839-2;Q9UEL2;B4DLR3;B3KX72;Q5RI18;Q5RI19;Q7Z4Q5	1	0.149284	0.0388798	0.0520443	0.000774091		Q5RI17					GYS1	0.0760926
ATP synthase subunit alpha, mitochondrial;ATP synthase subunit alpha	ATP5A1;ATP5A;ATP5AL2;ATPM	P25705;A8K092;B4DY56	1	2.27787	0.236628	0.213106	0.000788982		P25705					HK1	0.0106259
Chloride intracellular channel protein 1;Nuclear chloride ion channel 27;Chloride channel ABP;Regulatory nuclear chloride ion channel protein;Chloride intracellular channel 1 variant;Chloride intracellular channel 1;cDNA, FLJ94671, Homo sapiens chloride intracellular channel 1 (CLIC1), mRNA	CLIC1;NCC27;DADB-110M10.1-001;DAMA-236L13.3-001;DAMC-117B11.2-001;DAQB-350E15.4-001;DASS-312M4.8-001;XXbac-BCX88C14.3-001	O00299;Q53FB0;Q5SRT3	1	0.235785	0.0782914	0.0400191	0.00079232		O00299					PDK1	0.0259735
Galphai2 protein;Guanine nucleotide-binding protein G(i), alpha-2 subunit;Adenylate cyclase-inhibiting G alpha protein;GTP-binding regulatory protein Gi alpha-2 chain;GNAI2 protein;Guanine nucleotide binding protein (G protein), alpha inhibiting activity polypeptide 2;cDNA FLJ31012 fis, clone HLUNG2000217, highly similar to Guanine nucleotide-binding protein G(i), alpha-2 subunit;Guanine nucleoti…	GNAI2;GNAI2B;WUGSC:H_LUCA16.1;hCG_1997820;WUGSC:H_LUCA15.1	Q6B6N3;P04899-1;P04899;Q93020;Q96C71;P04899-2;B3KP24;B3KTZ0;B3KX51;B4DYA0;B4E2X5;Q6LCB5	1	0.350557	0.051187	0.0370495	0.000795534		Q6B6N3					PDK2	0.480762
Spectrin alpha chain, brain;Spectrin, non-erythroid alpha chain;Alpha-II spectrin;Fodrin alpha chain	SPTAN1;SPTA2	Q13813-2;Q13813	1	0.547227	0.0672666	0.0389103	0.000815411		Q13813					LDHA	0.0923302
Serine/threonine-protein kinase PCTAIRE-3;PCTAIRE-motif protein kinase 3;cDNA FLJ53597, highly similar to Homo sapiens PCTAIRE protein kinase 3 (PCTK3), transcript variant 1, mRNA;PCTAIRE protein kinase 3;cDNA FLJ44931 fis, clone BRAMY3015799, highly similar to Serine/threonine-protein kinase PCTAIRE-3 (EC 2.7.11.22);cDNA FLJ56472, highly similar to Serine/threonine-protein kinase PCTAIRE-3 (EC 2…	PCTK3;RP11-288G13.1-007;RP11-288G13.1-003	Q07002-3;Q07002;B4DK03;Q5VXQ4;Q07002-2;Q5VXQ3;Q07002-1;B3KX76;B4DER5;B4DHU6;Q59G02;Q9BWF9	1	0	0.0737874	0	0.000904967		Q07002					LDHB	0.0923302
MACRO domain-containing protein 1;Protein LRP16	MACROD1;LRP16	Q9BQ69	1	2.73949	0.393327	0.28138	0.000923542		Q9BQ69					LDHD	0.0923302
Nuclease-sensitive element-binding protein 1;Y-box-binding protein 1;Y-box transcription factor;YB-1;CCAAT-binding transcription factor I subunit A;Enhancer factor I subunit A;DNA-binding protein B;YBX1 protein;Nuclease sensitive element binding protein-1;RcNSEP1	YBX1;NSEP1;YB1	P67809;A0JLU4;Q05D43;Q6PKI6;Q7KZ24;Q2VIK8	1	0.171807	0.160607	0.101093	0.000926702		P67809
Dihydrolipoyllysine-residue acetyltransferase component of pyruvate dehydrogenase complex, mitochondrial;Pyruvate dehydrogenase complex E2 subunit;Dihydrolipoamide S-acetyltransferase component of pyruvate dehydrogenase complex;70 kDa mitochondrial autoantigen of primary biliary cirrhosis;M2 antigen complex 70 kDa subunit;cDNA FLJ50978, highly similar to Dihydrolipoyllysine-residue acetyltransfer…	DLAT;DLTA	P10515;B4DJX1;B4DS43;Q16791;Q86YI5;B4DLQ2;Q01991;Q9HAN0	1	1.83406	0.113457	0.172312	0.000933659		P10515					S-Fig. 1D	t-test p-value
Peptidyl-prolyl cis-trans isomerase A;Cyclophilin A;Cyclosporin A-binding protein;Peptidyl-prolyl cis-trans isomerase;Peptidylprolyl isomerase A (Cyclophilin A);cDNA FLJ75025, highly similar to Homo sapiens peptidylprolyl isomerase A (cyclophilin A) (PPIA), transcript variant 2, mRNA	PPIA;CYPA	P62937;A8K220;A8K486;A8MSH2;B2RE56;Q567Q0;Q71V99;B4DM82	1	0.297395	0.0689729	0.0214695	0.000949252		P62937					SOD1	0.00230759
Amine oxidase [flavin-containing] A;Monoamine oxidase type A;cDNA FLJ61220, highly similar to Amine oxidase (flavin-containing) A (EC 1.4.3.4);Monoamine oxidase A;Monoamine oxidase A variant;cDNA FLJ76052, highly similar to Homo sapiens monoamine oxidase A (MAOA), nuclear gene encoding mitochondrial protein, mRNA;Monoamine oxidase A, isoform CRA_a	MAOA;RP1-201D17__B.2-001;hCG_16826	P21397;B4DF46;Q49A63;Q53EZ0;Q53YE7;Q5UL91;Q5UL94;Q5ULA3;Q5ULA9	1	6.7324	0.234652	0.202466	0.000962967		P21397					SOD2	0.0180023
Heterogeneous nuclear ribonucleoprotein D-like;JKT41-binding protein;AU-rich element RNA-binding factor;Protein laAUF1;cDNA FLJ59198, highly similar to Homo sapiens heterogeneous nuclear ribonucleoprotein D-like (HNRPDL), transcript variant 2, mRNA;cDNA FLJ60148, highly similar to Homo sapiens heterogeneous nuclear ribonucleoprotein D-like (HNRPDL), transcript variant 2, mRNA	HNRPDL;JKTBP	O14979-1;O14979;B4DGN3;B4DTA2;O14979-2;O14979-3	1	0	0.0779108	0	0.00100862		O14979					MAOA	0.0923302
Enhancer of rudimentary homolog;Enhancer of rudimentary homolog (Drosophila), isoform CRA_a;cDNA, FLJ92473, Homo sapiens enhancer of rudimentary homolog (Drosophila) (ERH),mRNA	ERH;hCG_21966	P84090;B2R5H2	1	0	0.0800791	0	0.00106536		P84090
Putative uncharacterized protein DKFZp686P15220;Hepatitis B virus receptor binding protein;Putative uncharacterized protein DKFZp686I15196	DKFZp686P15220;DKFZp686I15196	Q6PI81;Q6N089;Q6PYX1;Q6PJF1;Q569F4;Q6N096	1	7.45818	0.270121	0.345039	0.00111579		Q6PI81
26S protease regulatory subunit S10B;Proteasome 26S subunit ATPase 6;Proteasome subunit p42;Proteasome (Prosome, macropain) 26S subunit, ATPase, 6;cDNA, FLJ94253, Homo sapiens proteasome (prosome, macropain) 26S subunit, ATPase, 6(PSMC6), mRNA	PSMC6;SUG2;hCG_22669	P62333;B2R975	1	0.337023	0.0588524	0.0453632	0.00115133		P62333
Polypyrimidine tract-binding protein 2;Neurally-enriched homolog of PTB;Neural polypyrimidine tract-binding protein;PTB-like protein;cDNA FLJ60858, highly similar to Polypyrimidine tract-binding protein 2;cDNA FLJ55936, highly similar to Polypyrimidine tract-binding protein 2;cDNA FLJ55583, highly similar to Polypyrimidine tract-binding protein 2;PTBP2;Putative uncharacterized protein PTBP2;cDNA …	PTBP2;NPTB;PTB;PTBLP	Q9UKA9-3;Q9UKA9;B4DSI2;B4DSS8;B4DSU5;O95652;Q9UKA9-4;A8MYV9;B4DI28;Q9UKA9-2;Q9UKA9-1;Q9UKA9-6;Q9UKA9-5	1	0	0.084457	0	0.00118461		Q9UKA9
DNA-directed RNA polymerase II subunit RPB2;DNA-directed RNA polymerase II subunit B;RNA polymerase II subunit B2;RNA polymerase II subunit 2;DNA-directed RNA polymerase II 140 kDa polypeptide;DNA-directed RNA polymerase	POLR2B;hCG_201171	P30876;A8K1A8	1	0	0.085191	0	0.00120521		P30876
Tripartite motif-containing protein 55;Muscle-specific RING finger protein 2;RING finger protein 29;cDNA FLJ34409 fis, clone HEART2001931, highly similar to Tripartite motif-containing protein 55 (Muscle-specific RING finger protein 2);Tripartite motif-containing 55, isoform CRA_b;Putative uncharacterized protein TRIM55;cDNA FLJ33991 fis, clone DFNES2007332, highly similar to Homo sapiens tripart…	TRIM55;MURF2;RNF29;hCG_18387	Q9BYV6-1;Q9BYV6;B3KRJ3;A8MXV5;Q9BYV6-3;Q9BYV6-2;B3KRC0;Q9BYV6-4	1	0.192822	0.0710229	0.0642347	0.00124717		Q9BYV6
Gamma-glutamyl hydrolase;Gamma-Glu-X carboxypeptidase;Conjugase;GH;cDNA FLJ76254, highly similar to Homo sapiens gamma-glutamyl hydrolase (GGH), mRNA;cDNA FLJ55415, highly similar to Gamma-glutamyl hydrolase (EC 3.4.19.9)	GGH	Q92820;A8K335;B4DVI2	1	0	0.0870594	0	0.00125846		Q92820
ATP-binding cassette sub-family F member 1;ATP-binding cassette 50;TNF-alpha-stimulated ABC protein;ATP-binding cassette sub-family F (GCN20) member 1;ATP-binding cassette, sub-family F (GCN20), member 1;ATP-binding cassette, sub-family F, member 1 variant;ABC50 protein;ATP-binding cassette, sub-family F (GCN20), member 1, isoform CRA_a	ABCF1;ABC50;DADB-129D20.7-001;DAMA-178G23.9-001;DAMC-83F13.6-001;DASS-182C6.1-001;DADB-129D20.7-002;DAMA-178G23.9-002;DAMC-83F13.6-002;DASS-182C6.1-002;hCG_26012	Q8NE71-1;Q8NE71;A2BF75;Q59F96;Q8NE71-2;Q2L6I2	1	0	0.0876006	0	0.00127409		Q8NE71
BTB/POZ domain-containing protein KCTD12;Pfetin;Predominantly fetal expressed T1 domain;cDNA FLJ46506 fis, clone THYMU3030752, highly similar to BTB/POZ domain-containing protein KCTD12	KCTD12;C13orf2;KIAA1778;PFET1	Q96CX2;B3KY04	1	0.172793	0.0423913	0.0328859	0.00127494		Q96CX2
Ubiquinone biosynthesis methyltransferase COQ5, mitochondrial;cDNA, FLJ96775;COQ5;cDNA FLJ50117, highly similar to Ubiquinone biosynthesis methyltransferase COQ5, mitochondrial (EC 2.1.1.-);Coenzyme Q5 homolog, methyltransferase (Yeast), isoform CRA_a;cDNA FLJ55122, highly similar to Ubiquinone biosynthesis methyltransferaseCOQ5, mitochondrial (EC 2.1.1.-)	COQ5;hCG_27778	Q5HYK3-1;Q5HYK3;B2RDU9;B3GK62;B4DEJ4;B4DP72	1	3.33437	0.0584817	0.204379	0.00127835		Q5HYK3
Trifunctional enzyme subunit alpha, mitochondrial;TP-alpha;78 kDa gastrin-binding protein;Long-chain enoyl-CoA hydratase;Long chain 3-hydroxyacyl-CoA dehydrogenase;Hydroxyacyl-Coenzyme A dehydrogenase/3-ketoacyl-Coenzyme A thiolase/enoyl-Coenzyme A hydratase (Trifunctional protein), alpha subunit, isoform CRA_a;cDNA, FLJ93497, Homo sapiens hydroxyacyl-Coenzyme A dehydrogenase/3-ketoacyl-Coenzyme …	HADHA;HADH;hCG_23132	P40939;B2R7L4;B4DDZ5;B4DRH6;Q53T69;Q53TA2;Q9UQC5	1	1.81507	0.122281	0.183289	0.00131839		P40939
T-complex protein 1 subunit gamma;CCT-gamma;cDNA FLJ57603, highly similar to T-complex protein 1 subunit gamma;cDNA, FLJ78822, highly similar to T-complex protein 1 subunit gamma;cDNA, FLJ79286, highly similar to T-complex protein 1 subunit gamma;PIG48;Chaperonin containing TCP1, subunit 3 (Gamma) variant;cDNA FLJ44436 fis, clone UTERU2019706, highly similar to T-complex protein 1 subunit gamma;C…	CCT3;CCTG;TRIC5;RP11-443G18.6-002	P49368;B4DUR8;Q2TU64;Q59H77;B3KX11;Q5SZY0;A6NE14	1	0.288576	0.15067	0.105685	0.00136286		P49368
Fructosamine-3-kinase;cDNA FLJ60514, highly similar to Fructosamine-3-kinase (EC 2.7.1.-);cDNA FLJ30276 fis, clone BRACE2002736, highly similar to Fructosamine-3-kinase	FN3K	Q9H479;B4DH12;B3KNR9	1	0.142335	0.211736	0.136025	0.00137029		Q9H479
Tubulin alpha-4A chain;Tubulin alpha-1 chain;Alpha-tubulin 1;Testis-specific alpha-tubulin;Tubulin H2-alpha;cDNA FLJ30169 fis, clone BRACE2000864, highly similar to TUBULIN ALPHA-4 CHAIN;Tubulin, alpha 1 (Testis specific), isoform CRA_b;cDNA FLJ58687, highly similar to Tubulin alpha-4 chain;Putative uncharacterized protein TUBA4A;Tubulin, alpha 1 (Testis specific), isoform CRA_a	TUBA4A;TUBA1;hCG_2013418	P68366;B3KNQ6;A8MUB1	1	0.311597	0.061617	0.0195682	0.00140166		P68366
			1	0.48137	0.0510555	0.0591338	0.00141005
Double-stranded RNA-binding protein Staufen homolog 2;cDNA FLJ78317, highly similar to Homo sapiens staufen, RNA binding protein, homolog 2 (Drosophila) (STAU2), mRNA;Staufen, RNA binding protein, homolog 2 (Drosophila);Staufen, RNA binding protein, homolog 2 (Drosophila), isoform CRA_d;cDNA, FLJ95458, Homo sapiens staufen, RNA binding protein, homolog 2 (Drosophila)(STAU2), mRNA;STAU2 variant pr…	STAU2;hCG_1810951;STAU2 variant protein	Q9NUL3-1;Q9NUL3;Q9NUL3-2;A8K276;Q9NUL3-3;Q2TBD5;Q4LE57;Q9NUL3-4	1	0.414816	0.454513	0.402631	0.00142637		Q9NUL3
Poly(A) RNA polymerase, mitochondrial;mtPAP;Polynucleotide adenylyltransferase;PAP-associated domain-containing protein 1	MTPAP;PAPD1	Q9NVV4-2;Q9NVV4;Q9NVV4-1	1	0	0.0931579	0	0.00144015		Q9NVV4
60S ribosomal protein L27	RPL27	P61353;B2R4D8;Q6LCU2	1	0	0.094673	0	0.00148717		P61353
Mitochondrial import receptor subunit TOM22 homolog;Translocase of outer membrane 22 kDa subunit homolog;1C9-2;Mitochondrial import receptor Tom22 variant;HCG2010808, isoform CRA_a;MSTP065;Translocase of outer mitochondrial membrane 22 homolog (Yeast);cDNA, FLJ92357, Homo sapiens translocase of outer mitochondrial membrane 22 homolog(yeast) (TOMM22), mRNA	TOMM22;TOM22;MST065;RP3-508I15.12-001;hCG_2010808	Q9NS69;Q53GB0;Q549C5	1	0.568795	0.140312	0.161907	0.00151897		Q9NS69
Hsp90 co-chaperone Cdc37;Hsp90 chaperone protein kinase-targeting subunit;p50Cdc37;CDC37 protein;MBD5 protein;CDC37 cell division cycle 37 homolog (S. cerevisiae);CDC37 cell division cycle 37 homolog (S. cerevisiae), isoform CRA_a	CDC37;CDC37A;MBD5;hCG_28478	Q16543;A1L0W4;Q53YA2;Q6FG59	1	0.492589	0.150578	0.14531	0.00152089		Q16543
Pre-mRNA-processing-splicing factor 8;Splicing factor Prp8;PRP8 homolog;220 kDa U5 snRNP-specific protein;p220;cDNA FLJ57882, highly similar to Pre-mRNA-processing-splicing factor 8;U5 snRNP-specific protein variant;Apoptosis-regulated protein 1;Apoptosis-regulated protein 2	PRPF8;PRPC8	Q6P2Q9;B4DK16;Q53GM6;Q6JH02;Q6JH03	1	0.0888278	0.107943	0.153854	0.00159371		Q6P2Q9
Signal transducer and activator of transcription 1-alpha/beta;Transcription factor ISGF-3 components p91/p84;cDNA FLJ78299, highly similar to Homo sapiens signal transducer and activator of transcription 1, 91kDa (STAT1), transcript variant alpha, mRNA;Signal transducer and activator of transcription 1, 91kDa, isoform CRA_a;cDNA, FLJ95929, Homo sapiens signal transducer and activator of transcrip…	STAT1;hCG_25794;DKFZp686B04100	P42224-1;P42224;A8K989;B2RCA0;Q68D00;P42224-2;Q53XW4	1	0	0.0986784	0	0.00161504		P42224
Succinyl-CoA ligase [GDP-forming] subunit beta, mitochondrial;GTP-specific succinyl-CoA synthetase subunit beta;Succinyl-CoA synthetase beta-G chain;SUCLG2 protein;Putative uncharacterized protein DKFZp586M2023	SUCLG2;DKFZp586M2023	Q96I99;Q3ZCW5;Q9Y436	1	2.88098	0.150376	0.3364	0.00163452		Q96I99
Alpha-actinin-4;Non-muscle alpha-actinin 4;F-actin cross-linking protein;ACTN4 protein;cDNA FLJ58087, highly similar to Alpha-actinin-4	ACTN4	O43707;Q96BG6;B4E337	1	0.255545	0.116765	0.0428207	0.00165302		O43707
Charged multivesicular body protein 4b;Chromatin-modifying protein 4b;Vacuolar protein-sorting-associated protein 32-2;SNF7-2;hSnf7-2;SNF7 homolog associated with Alix 1	CHMP4B;C20orf178;SHAX1	Q9H444	1	0.278134	0.086173	0.0426748	0.00168544		Q9H444
RNA-binding protein 14;RNA-binding motif protein 14;RRM-containing coactivator activator/modulator;Synaptotagmin-interacting protein;Paraspeckle protein 2;cDNA FLJ11706 fis, clone HEMBA1005101, highly similar to RNA-binding protein 14;RNA binding motif protein 14, isoform CRA_a;cDNA FLJ59137, highly similar to RNA-binding protein 14;RNA binding motif protein 14 variant	RBM14;SIP;hCG_20144	Q96PK6-1;Q96PK6;B3KMN4;B4DNG4;Q59GV2	1	0.104625	0.0161364	0.107144	0.00171408		Q96PK6
A-kinase anchor protein 13;Protein kinase A-anchoring protein 13;Breast cancer nuclear receptor-binding auxiliary protein;Human thyroid-anchoring protein 31;Guanine nucleotide exchange factor Lbc;AKAP-Lbc;P47;Lymphoid blast crisis oncogene;Non-oncogenic Rho GTPase-specific GTP exchange factor;Putative uncharacterized protein AKAP13	AKAP13;BRX;HT31;LBC	Q12802-2;Q12802;A8MVN0;Q12802-1;Q12802-4;Q12802-3	1	0	0.101682	0	0.00171434		Q12802
Developmentally-regulated GTP-binding protein 1;Neural precursor cell expressed developmentally down-regulated protein 3;Developmentally regulated GTP binding protein 1, isoform CRA_c;cDNA, FLJ96750, Homo sapiens developmentally regulated GTP binding protein 1(DRG1), mRNA;Putative uncharacterized protein DKFZp434N1827	DRG1;NEDD3;hCG_2010537;DKFZp434N1827	Q9Y295;B2RDS8;Q9UFA5	1	0.146796	0.184381	0.137169	0.00172107		Q9Y295
Long palate, lung and nasal epithelium carcinoma-associated protein 1;Von Ebner minor salivary gland protein;cDNA, FLJ93674	LPLUNC1;C20orf114;UNQ706/PRO1357	Q8TDL5-1;Q8TDL5;A8K2H8;B2R7Z6	1	1.50617	0.327894	0.286064	0.00174079		Q8TDL5
Enoyl-CoA hydratase, mitochondrial;Short chain enoyl-CoA hydratase;Enoyl-CoA hydratase 1	ECHS1	P30084	1	2.49402	0.579595	0.713162	0.00175523		P30084
Importin-5;Importin subunit beta-3;Karyopherin beta-3;Ran-binding protein 5;cDNA FLJ43041 fis, clone BRTHA3003339, highly similar to Importin beta-3;cDNA FLJ54573, highly similar to Importin beta-3;IPO5 protein	IPO5;KPNB3;RANBP5	O00410;B3KWG6;B4DZA0;B4E0R6;Q5T578;Q86XC7;Q9BVS9	1	0.275599	0.0715162	0.00527869	0.00178023		O00410
Plasminogen;Plasmin heavy chain A;Activation peptide;Angiostatin;Plasmin heavy chain A, short form;Plasmin light chain B;cDNA, FLJ93426, highly similar to Homo sapiens plasminogen (PLG), mRNA;cDNA FLJ58778, highly similar to Plasminogen (EC 3.4.21.7);Putative uncharacterized protein DKFZp779M0222;PLG protein	PLG;DKFZp779M0222	P00747;B2R7F8;B4DPH4;Q68DS2;Q9UMI2	1	3.14395	0.338817	0.116443	0.00179514		P00747
Calcium-binding mitochondrial carrier protein Aralar2;Mitochondrial aspartate glutamate carrier 2;Solute carrier family 25 member 13;Citrin;Solute carrier family 25, member 13 (Citrin) variant;Mitochondrial aspartate-glutamate carrier protein;Solute carrier family 25, member 13 (Citrin), isoform CRA_a;Putative uncharacterized protein SLC25A13	SLC25A13;ARALAR2;hCG_40633	Q9UJS0;Q53GR7;Q546F9;Q75KX8;Q75M55	1	0	0.104752	0	0.00181887		Q9UJS0
E3 ubiquitin-protein ligase LRSAM1;Leucine-rich repeat and sterile alpha motif-containing protein 1;Tsg101-associated ligase	LRSAM1;TAL;UNQ6496/PRO21356	Q6UWE0-1;Q6UWE0;Q6UWE0-2	1	0.205915	0.439915	0.356655	0.00182284		Q6UWE0
Serum amyloid P-component;9.5S alpha-1-glycoprotein;Serum amyloid P-component(1-203)	APCS;PTX2	P02743	1	16.264	0.912936	2.00837	0.00182767		P02743
Proteasome-associated protein ECM29 homolog;cDNA FLJ16204 fis, clone CTONG2019232, highly similar to Proteasome-associated protein ECM29 homolog;cDNA FLJ45314 fis, clone BRHIP3005142, highly similar to Proteasome-associated protein ECM29 homolog	ECM29;KIAA0368	Q5VYK3;B3KV72;B3KXF2	1	0.205487	0.27332	0.355914	0.00183263		Q5VYK3
Structural maintenance of chromosomes protein 1A;SMC1alpha protein;Sb1.8;cDNA FLJ77162, highly similar to Homo sapiens SMC1 structural maintenance of chromosomes 1-like 1 (SMC1L1), mRNA;SMC1A protein;Putative uncharacterized protein DKFZp686L19178	SMC1A;DXS423E;KIAA0178;SB1.8;SMC1;SMC1L1;DKFZp686L19178	Q14683;A8K7A6;Q68EN4;Q6MZR8;Q6P2R1	1	0	0.106251	0	0.00187099		Q14683
Malate dehydrogenase, mitochondrial;Malate dehydrogenase;Putative uncharacterized protein MDH2;cDNA FLJ52880, highly similar to Malate dehydrogenase, mitochondrial (EC 1.1.1.37)	MDH2	P40926;B3KTM1;Q0QF37;Q6FHZ0;Q75MP7;Q75MT9;B4DE44	1	1.9655	0.126145	0.0945002	0.00187477		P40926
Ezrin;p81;Cytovillin;Villin-2;cDNA, FLJ92973, highly similar to Homo sapiens villin 2 (ezrin) (VIL2), mRNA;Cytovillin 2	EZR;VIL2	P15311;B2R6J2;Q6NUR7;Q9UJZ2;Q9UJZ6;Q9UJZ7;Q9UJZ8;Q9UK20	1	0.655856	0.128239	0.164782	0.0018774		P15311
General transcription factor II-I;Bruton tyrosine kinase-associated protein 135;SRF-Phox1-interacting protein;Williams-Beuren syndrome chromosomal region 6 protein;cDNA FLJ55916, highly similar to General transcription factor II-I;cDNA FLJ77440, highly similar to Homo sapiens general transcription factor II, i (GTF2I), transcript variant 2, mRNA;General transcription factor II, i;cDNA FLJ56355, h…	GTF2I;BAP135;WBSCR6;hCG_1735999	P78347-1;P78347;B4DH52;P78347-3;A8K9W7;Q75M86;P78347-4;Q499G6;Q75M87;P78347-2;B4DM07;B4DRA9;Q75M85;Q86U51	1	0.0536127	0.0204568	0.0928599	0.00188051		P78347
Cytochrome P450 20A1;cDNA FLJ59248, highly similar to Homo sapiens cytochrome P450, family 20, subfamily A, polypeptide 1, transcript variant 1, mRNA;CYP20A1 protein;Putative uncharacterized protein DKFZp666P073;Putative uncharacterized protein CYP20A1;Putative uncharacterized protein;Cytochrome P450 monooxygenase	CYP20A1;UNQ667/PRO1301;DKFZp666P073	Q6UW02;B4DLN7;Q567U3;Q658T6;Q53RS5;Q8WZ13;Q9HC04	1	0	0.106544	0	0.00188127		Q6UW02
Lamin-A/C;70 kDa lamin;Renal carcinoma antigen NY-REN-32;Lamin A/C transcript variant 1;Lamin A/C;Progerin;Lamin A/C, isoform CRA_b;LMNA protein;cDNA FLJ56081, highly similar to Lamin-A/C;Rhabdomyosarcoma antigen MU-RMS-40.12;cDNA FLJ55771, highly similar to Lamin-A/C	LMNA;LMN1;RP11-54H19.1-004;RP11-54H19.1-002;hCG_1997343;RP11-54H19.1-006;RP11-54H19.1-007;RP11-54H19.1-003	P02545-1;P02545;Q5I6Y4;Q5I6Y6;P02545-3;Q6UYC3;P02545-2;Q5I6Y5;Q5TCJ3;Q8N519;B4DI32;Q3BDU5;Q5TCI9;B4DFR3;Q5TCI8;Q5TCJ4	1	0.514087	0.0433472	0.0766409	0.00198567		P02545
Aspartate aminotransferase, mitochondrial;mAspAT;Transaminase A;Glutamate oxaloacetate transaminase 2;Fatty acid-binding protein;FABP-1;FABPpm;Aspartate aminotransferase	GOT2	P00505;A8K482;B3KUZ8;B4DJA6	1	3.80782	0.157525	0.423818	0.00201443		P00505
Vesicle-associated membrane protein-associated protein B/C;VAMP-B/VAMP-C;cDNA FLJ41544 fis, clone CERVX2002430, highly similar to Vesicle-associated membrane protein-associated protein B/C;VAMP (Vesicle-associated membrane protein)-associated protein B and C;cDNA FLJ13179 fis, clone NT2RP3003918, highly similar to Vesicle-associated membrane protein-associated protein B/C;VAMP (Vesicle-associated…	VAPB;UNQ484/PRO983;hCG_26693	O95292-1;O95292;B3KVU7;Q53XM7;A6NLV9;Q6ZSP7	1	1.81722	0.34764	0.438049	0.00202883		O95292
Mitochondrial 2-oxoglutarate/malate carrier protein;Solute carrier family 25 member 11;SLC25A11 protein;cDNA FLJ76014, highly similar to Homo sapiens solute carrier family 25 (mitochondrial carrier; oxoglutarate carrier), member 11 (SLC25A11), mRNA;Solute carrier family 25 (Mitochondrial carrier; oxoglutarate carrier), member 11, isoform CRA_b	SLC25A11;SLC20A4;hCG_32694	Q02978;Q6IBH0	1	1.94747	0.267379	0.332957	0.00204121		Q02978
Probable ATP-dependent RNA helicase DDX17;DEAD box protein 17;RNA-dependent helicase p72;DEAD box protein p72;DEAD (Asp-Glu-Ala-Asp) box polypeptide 17;DEAD (Asp-Glu-Ala-Asp) box polypeptide 17, isoform CRA_c;DEAD box polypeptide 17 isoform p82 variant;cDNA FLJ58652, highly similar to Probable ATP-dependent RNA helicase DDX17 (EC 3.6.1.-)	DDX17;RP3-434P1.4-001;hCG_41697;RP3-434P1.4-009;RP3-434P1.4-005	Q92841-1;Q92841;Q92841-3;B1AHM0;Q59F66;Q92841-2;B1AHM1;B1AHM2;B4DZQ7	1	0.135522	0.0827268	0.0149551	0.00204237		Q92841
40S ribosomal protein S10;Ribosomal protein S10, isoform CRA_c;cDNA, FLJ92058, Homo sapiens ribosomal protein S10 (RPS10), mRNA;Ribosomal protein S10;Putative uncharacterized protein ENSP00000383249;Ribosomal protein S10 variant	RPS10;hCG_1743714;RP11-375E1__A.4-005	P46783;B2R4E3;Q5TZB9;A8MVA6;Q59GE4	1	0.0542905	0.0256515	0.0940339	0.00206152		P46783
Actin, alpha cardiac muscle 1;Alpha-cardiac actin;cDNA FLJ32030 fis, clone NTONG2000040, highly similar to Actin, alpha cardiac	ACTC1;ACTC	P68032;B3KPP5	1	1.16318	0.141373	0.158692	0.00208656		P68032
Secernin-1;cDNA FLJ75484, highly similar to Homo sapiens secernin 1 (SCRN1), mRNA;Secernin 1, isoform CRA_b;cDNA FLJ59687, highly similar to Secernin-1;cDNA FLJ59884, highly similar to Secernin-1;cDNA FLJ59539, highly similar to Secernin-1;Secernin 1, isoform CRA_a;cDNA FLJ51971, highly similar to Secernin-1	SCRN1;KIAA0193;hCG_37324	Q12765;A8K0E9;B4DHM0;B4DH22;B4DIP5;B4DIV7	1	0	0.113	0	0.00211467		Q12765
Chromobox protein homolog 5;Heterochromatin protein 1 homolog alpha;Antigen p25;Chromobox homolog 5 (HP1 alpha homolog, Drosophila), isoform CRA_b;cDNA, FLJ94062, Homo sapiens chromobox homolog 5 (HP1 alpha homolog, Drosophila)(CBX5), mRNA;CBX5 protein	CBX5;HP1A;hCG_2018191	P45973;B2R8T9;Q6I9T7	1	0	0.113274	0	0.00212488		P45973
cDNA FLJ52712, highly similar to Tubulin beta-6 chain		B4DP54	1	0	0.114621	0	0.00217537		B4DP54
RuvB-like 1;49 kDa TATA box-binding protein-interacting protein;TIP49a;Pontin 52;Nuclear matrix protein 238;54 kDa erythrocyte cytosolic protein;TIP60-associated protein 54-alpha;INO80 complex subunit H;cDNA, FLJ92593, Homo sapiens RuvB-like 1 (E. coli) (RUVBL1), mRNA (RuvB-like 1);cDNA FLJ34844 fis, clone NT2NE2011154, highly similar to RuvB-like 1	RUVBL1;INO80H;NMP238;TIP49;TIP49A	Q9Y265-1;Q9Y265;B2R5S0;B5BUB1;Q9Y265-2;B3KRS7	1	0.217799	0.172333	0.0880836	0.00220788		Q9Y265
2,4-dienoyl-CoA reductase, mitochondrial;2,4-dienoyl-CoA reductase [NADPH];2,4-dienoyl-CoA reductase	DECR1;DECR	Q16698;Q7LDK6	1	2.51669	0.343668	0.172353	0.0022161		Q16698
Heterogeneous nuclear ribonucleoprotein G;RNA-binding motif protein, X chromosome;Glycoprotein p43;Heterogeneous nuclear ribonucleoprotein G, N-terminally processed;cDNA FLJ34201 fis, clone FCBBF3019714, highly similar to HETEROGENEOUS NUCLEAR RIBONUCLEOPROTEIN G;cDNA FLJ54953, highly similar to Heterogeneous nuclear ribonucleoprotein G;cDNA FLJ38696 fis, clone KIDNE2001931, highly similar to HET…	RBMX;HNRPG;RBMXP1;RP11-1114A5.1-003	P38159;B3KRG5;B4E352;Q8N8Y7;B4E3U4;Q5JQ65	1	0.153268	0.0507712	0.0480659	0.00225296		P38159
Activated RNA polymerase II transcriptional coactivator p15;SUB1 homolog;Positive cofactor 4;p14;Activated RNA polymerase II transcription cofactor 4 variant;PC4 protein;SUB1 homolog (S. cerevisiae);SUB1 homolog (S. cerevisiae), isoform CRA_a;cDNA, FLJ92014, highly similar to Homo sapiens SUB1 homolog (S. cerevisiae) (SUB1), mRNA	SUB1;PC4;RPO2TC1;hCG_1781938	P53999;Q59G24;Q6IBA2	1	0.066821	0.223797	0.115737	0.00228672		P53999
Superoxide dismutase [Cu-Zn]	SOD1	P00441	1	2.11288	0.377387	0.497077	0.00230759		P00441
cDNA FLJ16373 fis, clone THYMU3000269, highly similar to Succinate dehydrogenase (ubiquinone) flavoprotein subunit, mitochondrial (EC 1.3.5.1)		B3KYA5	1	2.63549	0.253155	0.379026	0.00231662		B3KYA5
Splicing factor, proline- and glutamine-rich;Polypyrimidine tract-binding protein-associated-splicing factor;DNA-binding p52/p100 complex, 100 kDa subunit;100 kDa DNA-pairing protein;SFPQ protein;Splicing factor proline/glutamine-rich (Polypyrimidine tract binding protein associated)	SFPQ;PSF	P23246-1;P23246;Q6PIX2;Q86VG2;Q9BSV4;P23246-2	1	0.165566	0.135602	0.0472922	0.00241398		P23246
Enhancer of mRNA-decapping protein 4;Human enhancer of decapping large subunit;Autoantigen Ge-1;Autoantigen RCD-8;cDNA FLJ76807, highly similar to Homo sapiens autoantigen (RCD-8), mRNA;Autoantigen	EDC4;HEDLS;RCD-8;hCG_28105	Q6P2E9-1;Q6P2E9;A8K4T4;Q6P2E9-2	1	0	0.121018	0	0.00242315		Q6P2E9
60S ribosomal protein L9;NPC-A-16;Ribosomal protein L9;Ribosomal protein L9 isoform;Ribosomal protein L9, isoform CRA_b;cDNA, FLJ92535, Homo sapiens ribosomal protein L9 (RPL9), mRNA;cDNA FLJ51990, highly similar to 60S ribosomal protein L9;Ribosomal protein L9, isoform CRA_d;cDNA FLJ52179, highly similar to 60S ribosomal protein L9;Putative uncharacterized protein	RPL9;OK/SW-cl.103;RPL9P7;RPL9P8;RPL9P9;hCG_37461	P32969;Q53Z07;B4DLV8;B4E1M5;Q2NKY6	1	0.233277	0.105969	0.0250686	0.0024386		P32969
Tubulin-specific chaperone D;Tubulin-folding cofactor D;Beta-tubulin cofactor D;SSD-1;cDNA FLJ61213, highly similar to Tubulin-specific chaperone D	TBCD;KIAA0988;SSD1;TFCD;PP1096	Q9BTW9-4;Q9BTW9;Q9BTW9-1;B4DE53;Q9BTW9-5;Q9BTW9-3	1	0	0.121822	0	0.00245522		Q9BTW9
cDNA FLJ59683, highly similar to Homo sapiens malignant T cell amplified sequence 1 (MCTS1), mRNA;Malignant T cell amplified sequence 1;Multiple copies T-cell malignancies	MCTS1;MCT1	B4DGY2;Q9ULC4-1;Q9ULC4;Q9ULC4-2	1	0.421856	0.105825	0.168934	0.00252162		B4DGY2
L-2-hydroxyglutarate dehydrogenase, mitochondrial;cDNA FLJ76725, highly similar to Homo sapiens L-2-hydroxyglutarate dehydrogenase (L2HGDH), mRNA	L2HGDH;C14orf160	Q9H9P8-1;Q9H9P8;A8K9B2;Q9H9P8-2	1	2.236	0.102162	0.21916	0.00263316		Q9H9P8
2',3'-cyclic-nucleotide 3'-phosphodiesterase;cDNA FLJ59866, highly similar to 2',3'-cyclic-nucleotide 3'-phosphodiesterase (EC 3.1.4.37);cDNA FLJ52954, highly similar to 2',3'-cyclic-nucleotide 3'-phosphodiesterase(EC 3.1.4.37)	CNP	P09543-1;P09543;P09543-2;B4DFN6;B4DI06	1	0	0.126878	0	0.00266159		P09543
Clathrin light chain A;cDNA FLJ60566, highly similar to Clathrin light chain A;cDNA FLJ77116, highly similar to Homo sapiens clathrin, light polypeptide (Lca) (CLTA), transcript variant nonbrain, mRNA;Clathrin, light polypeptide (Lca), isoform CRA_c	CLTA;hCG_28059	P09496-1;P09496;P09496-3;B4DIN1;P09496-2;A8K4W3	1	0	0.128234	0	0.00271834		P09496
Cofilin-1;Cofilin, non-muscle isoform;18 kDa phosphoprotein;p18;cDNA FLJ40371 fis, clone TESTI2034931, highly similar to Cofilin-1;Cofilin 1 (Non-muscle), isoform CRA_b;cDNA FLJ51435, moderately similar to Cofilin-1	CFL1;CFL;hCG_2039457	P23528;B3KUQ1;B4E112	1	0.292084	0.115223	0.12706	0.00279681		P23528
Pre-mRNA-processing factor 19;PRP19/PSO4 homolog;Nuclear matrix protein 200;Senescence evasion factor	PRPF19;NMP200;PRP19;SNEV	Q9UMS4	1	0	0.130891	0	0.00283117		Q9UMS4
Nuclear cap-binding protein subunit 1;80 kDa nuclear cap-binding protein;NCBP 80 kDa subunit;cDNA, FLJ93236, highly similar to Homo sapiens nuclear cap binding protein subunit 1, 80kDa (NCBP1),mRNA	NCBP1;CBP80;NCBP	Q09161;B2R718	1	0	0.131325	0	0.00284984		Q09161
PRA1 family protein 3;ADP-ribosylation factor-like protein 6-interacting protein 5;Glutamate transporter EAAC1-interacting protein;GTRAP3-18;Prenylated Rab acceptor protein 2;Protein JWa;Dermal papilla-derived protein 11;JM5;Putative MAPK-activating protein PM27;Cytoskeleton-related vitamin A-responsive protein;ADP-ribosylation-like factor 6 interacting protein 5, isoform CRA_a;cDNA, FLJ93137, Ho…	ARL6IP5;DERP11;JWA;PRA2;PRAF3;HSPC127;hCG_17314	O75915;B2R6V5;B3KQB4;B4DZZ0	1	1.15811	0.198846	0.197749	0.00285101		O75915
Splicing factor, arginine/serine-rich 3;Pre-mRNA-splicing factor SRP20;Splicing factor arginine/serine-rich 3;Splicing factor, arginine/serine-rich 3, isoform CRA_d;cDNA, FLJ92926, Homo sapiens splicing factor, arginine/serine-rich 3 (SFRS3), mRNA;cDNA FLJ52832, highly similar to Splicing factor, arginine/serine-rich 3;Splicing factor, arginine/serine-rich 3, isoform CRA_a	SFRS3;SRP20;hCG_14802	P84103;B2R6F3;B4E241	1	0	0.132745	0	0.00291124		P84103
FK506-binding protein 8;Peptidyl-prolyl cis-trans isomerase;38 kDa FK506-binding protein;FKBPR38;cDNA, FLJ93891, Homo sapiens FK506 binding protein 8, 38kDa (FKBP8), mRNA	FKBP8;FKBP38	Q14318-2;Q14318;B2R8G6;Q14318-1	1	0	0.135268	0	0.00302196		Q14318
GDP-fucose protein O-fucosyltransferase 1;Peptide-O-fucosyltransferase 1;Protein O-fucosyltransferase 1, isoform CRA_a;cDNA FLJ76804, highly similar to Homo sapiens protein O-fucosyltransferase 1 (POFUT1), transcript variant 1, mRNA;cDNA FLJ50232, highly similar to GDP-fucose protein O-fucosyltransferase 1 (EC 2.4.1.221);cDNA FLJ50933, highly similar to GDP-fucose protein O-fucosyltransferase 1 (…	POFUT1;FUT12;KIAA0180;hCG_38819;RP11-392M18.1-005	Q9H488-1;Q9H488;A8K4R8;B4DUV4;B4DZS3;Q9H488-2;Q5W185	1	0.100292	0.0910683	0.17371	0.0030484		Q9H488
Dynactin subunit 2;Dynactin complex 50 kDa subunit;50 kDa dynein-associated polypeptide;p50 dynamitin;cDNA, FLJ95559, Homo sapiens dynactin 2 (p50) (DCTN2), mRNA;cDNA FLJ38923 fis, clone NT2NE2011823, highly similar to Dynactin subunit 2;Dynactin 2 variant;cDNA FLJ31120 fis, clone IMR322000730, highly similar to Dynactin subunit 2;cDNA FLJ77785;Dynactin 2 (P50), isoform CRA_b	DCTN2;DCTN50;hCG_2016464	Q13561;B2RBK5;B3KTX4;Q53H88;A8K8J9	1	0.651586	0.0570653	0.0636452	0.00309636		Q13561
Splicing factor U2AF 65 kDa subunit;U2 auxiliary factor 65 kDa subunit;U2 snRNP auxiliary factor large subunit;U2 small nuclear RNA auxiliary factor 2 isoform b	U2AF2;U2AF65	P26368-1;P26368;B5BU25;P26368-2	1	0.0615412	0.0981877	0.0543793	0.00317977		P26368
Flotillin-2;Epidermal surface antigen;FLOT2 protein;Flotillin 2;HCG1998851, isoform CRA_e	FLOT2;ESA1;M17S1;hCG_1998851	Q14254;Q6FG43;Q9BTI6	1	0.170316	0.316915	0.294996	0.00321362		Q14254
NADH-ubiquinone oxidoreductase 75 kDa subunit, mitochondrial;Complex I-75kD;cDNA FLJ54000, highly similar to NADH-ubiquinone oxidoreductase 75 kDa subunit, mitochondrial (EC 1.6.5.3);cDNA FLJ60586, highly similar to NADH-ubiquinone oxidoreductase 75 kDa subunit, mitochondrial (EC 1.6.5.3);NADH-ubiquinone oxidoreductase 75 kDa subunit;cDNA FLJ55879, highly similar to NADH-ubiquinone oxidoreductase…	NDUFS1;hCG_17250	P28331;B4DIN9;B4DJ81;B4DJA0;B4DPG1;B4DUC1;Q9P1A0	1	2.46052	0.112813	0.238004	0.00325314		P28331
Collagen alpha-6(VI) chain	COL6A6	A6NMZ7-1;A6NMZ7;A6NMZ7-2	1	0.476461	0.387365	0.330135	0.0032711		A6NMZ7
Hemoglobin subunit gamma-1;Hemoglobin gamma-1 chain;Gamma-1-globin;Hemoglobin gamma-A chain;Hb F Agamma;Hemoglobin, gamma A;PRO2979;Gamma A hemoglobin	HBG1;hCG_28329	P69891;Q549G1;Q8TDA1	1	0.0536339	0.160885	0.0278965	0.00338098		P69891
Oxysterol-binding protein-related protein 8;Oxysterol-binding protein;cDNA FLJ31273 fis, clone KIDNE2006299, weakly similar to BOB1 PROTEIN	OSBPL8;KIAA1451;ORP8;OSBP10;DKFZp686C0249;DKFZp686A11164	Q9BZF1-1;Q9BZF1;Q5HYM3;Q641R2;Q96N80;Q9BZF1-2;Q68D75	1	0	0.143928	0	0.00341719		Q9BZF1
40S ribosomal protein S3a;cDNA FLJ78591, highly similar to Homo sapiens ribosomal protein S3A (RPS3A), mRNA;Ribosomal protein S3A, isoform CRA_d;cDNA, FLJ92049, Homo sapiens ribosomal protein S3A (RPS3A), mRNA;Ribosomal protein S3A	RPS3A;MFTL;hCG_2026261	P61247;A8K4W0;B2R4D4;Q6NXR8;A6NGM3	1	0.276078	0.0863047	0.182784	0.00342016		P61247
Ankyrin repeat and FYVE domain-containing protein 1;Ankyrin repeats hooked to a zinc finger motif;cDNA FLJ32485 fis, clone SKNMC2001596, highly similar to Ankyrin repeat and FYVE domain-containing protein 1;Putative uncharacterized protein DKFZp686M19106	ANKFY1;ANKHZN;KIAA1255;DKFZp686M19106	Q9P2R3-1;Q9P2R3;B3KPZ0;Q5H9P4;Q9P2R3-2	1	0.145717	0.228565	0.252389	0.00344771		Q9P2R3
Elongation factor 2;EEF2 protein;Eukaryotic translation elongation factor 2, isoform CRA_a;cDNA FLJ60696, highly similar to Elongation factor 2;cDNA FLJ58164, highly similar to Elongation factor 2;Similar to Elongation factor 2b;cDNA FLJ56548, highly similar to Elongation factor 2	EEF2;EF2;hCG_23520	P13639;B2RMP5;B4DMC6;B4DRE8;Q6PK56;Q8TA90;B4DPU3	1	0.427971	0.0751209	0.0740159	0.0034933		P13639
NHP2 non-histone chromosome protein 2-like 1 (S. cerevisiae);NHP2-like protein 1;High mobility group-like nuclear protein 2 homolog 1;U4/U6.U5 tri-snRNP 15.5 kDa protein;OTK27;hSNU13;NHP2 non-histone chromosome protein 2-like 1 (S. cerevisiae), isoform CRA_a;NHP2L1 protein;cDNA, FLJ92061, Homo sapiens NHP2 non-histone chromosome protein 2-like 1 (S.cerevisiae) (NHP2L1), mRNA	NHP2L1;CTA-216E10.8-008;CTA-216E10.8-001;hCG_41538	B1AHD1;P55769;Q6FHM6	1	0	0.145573	0	0.00349493		B1AHD1
26S proteasome non-ATPase regulatory subunit 9;26S proteasome regulatory subunit p27	PSMD9	O00233-1;O00233;O00233-2	1	0.269948	0.236213	0.28546	0.00349684		O00233
Probable transcription factor PML;Tripartite motif-containing protein 19;RING finger protein 71;cDNA FLJ58282, highly similar to Probable transcription factor PML;Tripartite motif protein TRIM19 zeta;Tripartite motif protein TRIM19 delta;Tripartite motif protein TRIM19 kappa;Tripartite motif protein TRIM19 gamma;PML-RAR protein;PP8675;Promyelocytic leukemia;PML protein;Tripartite motif protein TR…	PML;MYL;RNF71;TRIM19;PML-RAR;promyelocytic leukemia protein	P29590-1;P29590;B4DTK9;Q9BZX9;Q9BZY1;Q9BZX7;Q9BZY2;P29590-3;Q15156;Q71RA7;Q9BWP7;Q15959;P29590-5;P29590-2;Q9BZY0;Q9BZY3;A4VCI9;Q59FP9;Q9BZX6;P29590-4;Q9BZX8;Q9UE85;Q05835;Q59GQ8;Q59H09;Q9BPW2	1	0	0.148356	0	0.00362838		P29590
Cadherin-13;Truncated cadherin;Heart cadherin;P105	CDH13;CDHH	P55290	1	17.9727	0.0718484	2.55747	0.00363291		P55290
Putative uncharacterized protein MATR3;Matrin-3;cDNA FLJ10526 fis, clone NT2RP2000931, highly similar to Matrin-3;cDNA FLJ55637, highly similar to Matrin-3;cDNA FLJ53172, highly similar to Matrin-3;Putative uncharacterized protein DKFZp686K0542;Putative uncharacterized protein DKFZp686K23100;Clone CDABP0107 mRNA sequence	MATR3;KIAA0723;DKFZp686K0542;DKFZp686K23100	A8MXP9;P43243;B3KM87;B4DF66;B4DRS1;Q5CZA7;Q68D11;Q9H4N1	1	0.139871	0.145937	0.019118	0.00367254		A8MXP9
Prolyl endopeptidase;Post-proline cleaving enzyme;cDNA, FLJ94921, highly similar to Homo sapiens prolyl endopeptidase (PREP), mRNA;Prolyl oligopeptidase	PREP;PEP	P48147;B2RAH7;Q9UM02	1	0.343721	0.0864729	0.0490197	0.00370341		P48147
Methionine aminopeptidase 1;Peptidase M 1;Methionine aminopeptidase	METAP1;KIAA0094;hCG_41486;DKFZp781C0419	P53582;B4E2E6;Q5CZ91	1	0	0.151376	0	0.0037759		P53582
UDP-glucose 6-dehydrogenase;cDNA FLJ40611 fis, clone THYMU2012690, highly similar to UDP-GLUCOSE 6-DEHYDROGENASE (EC 1.1.1.22);UDP-glucose dehydrogenase, isoform CRA_b;cDNA FLJ60093, highly similar to UDP-glucose 6-dehydrogenase (EC 1.1.1.22);Uridine diphospho-glucose dehydrogenase;UDPglucose dehydrogenase	UGDH;hCG_38554;GDH;ugd	O60701;B3KUU2;B4DN25;Q9NQ81;Q9NQ82;Q9NQ83;Q9NY20	1	0.24637	0.193833	0.220592	0.00382749		O60701
Proteasome subunit beta type-7;Proteasome subunit Z;Macropain chain Z;Multicatalytic endopeptidase complex chain Z;Proteasome subunit beta type	PSMB7;RP11-101K10.7-001;hCG_29221	Q99436;B2RAQ9;Q5TBG6;Q6IBT1;Q86U62	1	0	0.152634	0	0.00383821		Q99436
Coatomer subunit delta;Delta-coat protein;Archain 1, isoform CRA_b;Coatomer subunit delta variant 1;cDNA, FLJ92603, Homo sapiens archain 1 (ARCN1), mRNA;Archain 1, isoform CRA_a;Coatomer subunit delta variant 2;Putative uncharacterized protein DKFZp686M09245;cDNA FLJ51620, highly similar to Coatomer subunit delta	ARCN1;COPD;hCG_40220;DKFZp686M09245	P48444;B0YIW5;B0YIW6;Q6MZV5;B4E1X2	1	0.291237	0.130624	0.0583236	0.00385804		P48444
Myosin light chain 4;Myosin light chain 1, embryonic muscle/atrial isoform;Myosin light chain alkali, GT-1 isoform	MYL4;MLC1;PRO1957	P12829	1	0.175696	0.139501	0.143711	0.0038673		P12829
Band 4.1-like protein 2;Generally expressed protein 4.1;4.1G;4.1G isoform;Putative uncharacterized protein DKFZp781H1755;cDNA FLJ58484, highly similar to Band 4.1-like protein 2;EPB41L2 protein variant	EPB41L2;DKFZp781H1755	O43491;Q6R5J7;Q68DV2;B4DHI8;Q59FD8	1	0.157887	0.316921	0.273469	0.00391682		O43491
Rho guanine nucleotide exchange factor 7;PAK-interacting exchange factor beta;Beta-Pix;COOL-1;p85;Rho guanine nucleotide exchange factor (GEF) 7;ARHGEF7 protein;KIAA0142 splice variant 1	ARHGEF7;COOL1;KIAA0142;P85SPR;PAK3BP;PIXB;Nbla10314;RP11-494P5.1-001;RP11-494P5.1-004	Q14155-5;Q14155;B1ALK7;Q14155-1;Q5ZEZ2;Q14155-4;B1ALK5;Q5W9H1;Q14155-3;Q14155-2;Q14155-6;Q5ZEZ3	1	0.178934	0.202613	0.204238	0.00393823		Q14155
Inactive dual specificity phosphatase 27	DUSP27	Q5VZP5	1	0	0.154857	0	0.00394948		Q5VZP5
Serine/threonine-protein kinase TAO2;Thousand and one amino acid protein 2;Prostate-derived STE20-like kinase 1;Kinase from chicken homolog C;TAO kinase 2;TAO kinase 2, isoform CRA_a;TAOK2 protein;cDNA FLJ77457, highly similar to Homo sapiens TAO kinase 2 (TAOK2), transcript variant 1, mRNA;TAO kinase 2, isoform CRA_b;cDNA FLJ56606, highly similar to Serine/threonine-protein kinase TAO2 (EC 2.7.1…	TAOK2;KIAA0881;MAP3K17;PSK;PSK1;UNQ2971/PRO7431;hCG_18349	Q9UL54-1;Q9UL54;A5PKY1;B2RN35;Q86V37;Q9UL54-3;Q9UL54-2;A7MCZ2;B4E2V3;A0PJ48;Q6PIN8	1	0	0.155449	0	0.00397941		Q9UL54
Sepiapterin reductase;Putative uncharacterized protein SPR;Sepiapterin Reductase	SPR	P35270;Q93041;Q9UEC5	1	10.69	1.34881	2.13278	0.00404273		P35270
cDNA FLJ78093, highly similar to Homo sapiens ribosomal protein L29 (RPL29), mRNA;60S ribosomal protein L29;Cell surface heparin-binding protein HIP;Ribosomal protein L29 (RPL29) pseudogene;Ribosomal protein L29	RPL29;RP11-632C17__A.1-001	A8K0H3;P47914;Q5T1D1;Q6IPI1	1	0	0.157712	0	0.00409465		A8K0H3
Putative uncharacterized protein NDUFA3;NADH dehydrogenase [ubiquinone] 1 alpha subcomplex subunit 3;NADH-ubiquinone oxidoreductase B9 subunit;Complex I-B9;NADH dehydrogenase (Ubiquinone) 1 alpha subcomplex, 3, 9kDa, isoform CRA_e;NDUFA3 protein;cDNA FLJ76508, highly similar to Homo sapiens NADH dehydrogenase (ubiquinone) 1 alpha subcomplex, 3, 9kDa (NDUFA3), mRNA	NDUFA3;hCG_20947	A8MXT3;O95167;Q6FGG4	1	4.08686	0.312375	0.181391	0.00409812		A8MXT3
Guanine nucleotide-binding protein subunit beta-2-like 1;Guanine nucleotide-binding protein subunit beta-like protein 12.3;Receptor of activated protein kinase C 1;Receptor for activated C kinase;Cell proliferation-inducing gene 21 protein;Human lung cancer oncogene 7 protein;cDNA FLJ60170, highly similar to Guanine nucleotide-binding protein subunit beta 2-like 1	GNB2L1;HLC7;PIG21	P63244;B4DVD2	1	0.252478	0.0365313	0.125634	0.00421386		P63244
Mitotic checkpoint protein BUB3;BUB3 budding uninhibited by benzimidazoles 3 homolog (Yeast), isoform CRA_b;cDNA, FLJ92917, Homo sapiens BUB3 budding uninhibited by benzimidazoles 3 homolog(yeast) (BUB3), mRNA;cDNA FLJ57899, highly similar to Mitotic checkpoint protein BUB3;BUB3 budding uninhibited by benzimidazoles 3 homolog (Yeast), isoform CRA_a;Putative uncharacterized protein BUB3;BUB3 buddi…	BUB3;hCG_41421	O43684;B2R6E7;B4DDM6;A6NJ42;B5MCE8;A6NGZ9	1	0	0.160998	0	0.00426488		O43684
J kappa 5;IGK@ protein;Ig kappa chain C region	IGK@;IGKC	Q15537;Q6PIL8;P01834;Q6GMV9;Q6PJF2	1	3.67108	0.282981	0.47303	0.00428411		Q15537
Centrosomal protein 170kDa;Centrosomal protein of 170 kDa;KARP-1-binding protein;KARP1-binding protein;cDNA FLJ10802 fis, clone NT2RP4000817, highly similar to Homo sapiens centrosomal protein 170 kDa (CEP170), transcript variant alpha, mRNA;cDNA, FLJ94318;CEP170 protein;Putative uncharacterized protein DKFZp564B0982	CEP170;RP11-411G13.1-004;FAM68A;KAB;KIAA0470;DKFZp564B0982	B1ARM6;Q5SW79-1;Q5SW79;Q5SW79-3;A6H8X9;B2RTS4;B3KME6;Q5SW79-2;B2R9B7;Q6AZE1;Q9NSN9	1	0	0.161472	0	0.0042897		B1ARM6
Vesicle-fusing ATPase;N-ethylmaleimide-sensitive fusion protein;Vesicular-fusion protein NSF;cDNA FLJ75618, highly similar to Homo sapiens N-ethylmaleimide-sensitive factor (NSF), mRNA;cDNA FLJ59316, highly similar to Vesicle-fusing ATPase (EC 3.6.4.6);cDNA FLJ54349, highly similar to Vesicle-fusing ATPase (EC 3.6.4.6);cDNA FLJ54615, highly similar to Vesicle-fusing ATPase (EC 3.6.4.6);cDNA FLJ54…	NSF	P46459;A8K2D9;B4DFA2;B4DGR3;B4DH19;B4DSK5;Q96D47;Q9H3V6	1	0.049284	0.239089	0.0853624	0.00430999		P46459
Adenosylhomocysteinase;S-adenosyl-L-homocysteine hydrolase;cDNA FLJ52743, highly similar to Adenosylhomocysteinase (EC 3.3.1.1);cDNA, FLJ79079, highly similar to Adenosylhomocysteinase (EC 3.3.1.1);AHCY protein	AHCY;SAHH;hCG_38508	P23526;A8K307;B3KUN3;Q1RMG2	1	0.325728	0.277228	0.167863	0.00434148		P23526
40S ribosomal protein S12	RPS12	Q76M58;P25398	1	0.235794	0.110356	0.160585	0.00437233		Q76M58
FAS-associated factor 2;UBX domain-containing protein 3B;UBX domain-containing protein 8;Protein ETEA;cDNA FLJ61076, highly similar to UBX domain-containing protein 8	FAF2;ETEA;KIAA0887;UBXD8;UBXN3B	Q96CS3;B4E2M8	1	0	0.163071	0	0.00437396		Q96CS3
60S ribosomal protein L14;CAG-ISL 7;cDNA FLJ76611, highly similar to Homo sapiens ribosomal protein L14 (RPL14), mRNA;cDNA FLJ75556, highly similar to Homo sapiens ribosomal protein L14, mRNA;Ribosomal protein L14 variant;RPL14 protein	RPL14	P50914;A8K3Q9;A8K7N0;Q45RF0;Q53G20;Q6IPH7	1	0.23599	0.0929335	0.035541	0.00437559		P50914
Glycogen phosphorylase, liver form;Phosphorylase	PYGL	P06737;B2R825;B4DUB7	1	0.109329	0.175924	0.189363	0.00440109		P06737
Alpha-enolase;2-phospho-D-glycerate hydro-lyase;Non-neural enolase;Enolase 1;Phosphopyruvate hydratase;C-myc promoter-binding protein;MBP-1;MPB-1;Plasminogen-binding protein;Enolase	ENO1;ENO1L1;MBPB1;MPB1	P06733-1;P06733;A4QMW8;A4UCS8;Q96GV1;Q9BT62;P06733-2	1	0.465286	0.078847	0.0932754	0.0044292		P06733
UPF0568 protein C14orf166;CLE7;Chromosome 14 open reading frame 166, isoform CRA_a;Lcrp369;cDNA, FLJ92278;CLE	C14orf166;CGI-99;hCG_22667	Q9Y224;Q549M8;Q5RLJ0	1	0.169963	0.0843762	0.180703	0.00444246		Q9Y224
Heterogeneous nuclear ribonucleoprotein K;Transformation up-regulated nuclear protein;cDNA FLJ54552, highly similar to Heterogeneous nuclear ribonucleoprotein K;cDNA FLJ39066 fis, clone NT2RP7014743, highly similar to HETEROGENEOUS NUCLEAR RIBONUCLEOPROTEIN K;cDNA FLJ41122 fis, clone BRACE2013911, highly similar to HETEROGENEOUS NUCLEAR RIBONUCLEOPROTEIN K	HNRNPK;HNRPK;RP11-575L7.1-005;RP11-575L7.1-001	P61978-3;P61978;B4DUQ1;Q5T6W2;B3KU16;Q5T6W5	1	0.229856	0.0948196	0.0384648	0.00446467		P61978
Nicotinate phosphoribosyltransferase;Nicotinate phosphoribosyltransferase domain-containing protein 1;FHA-HIT-interacting protein;PP3856	NAPRT1;FHIP	Q6XQN6-2;Q6XQN6;Q6XQN6-1;Q8WY82;Q6XQN6-3;Q6XQN6-4	1	0	0.165052	0	0.00447942		Q6XQN6
Popeye domain-containing protein 2	POPDC2;POP2	Q9HBU9-1;Q9HBU9;Q9HBU9-2	1	0.26742	0.0634386	0.0594975	0.00448678		Q9HBU9
Uncharacterized protein C11orf73	C11orf73;HSPC138;HSPC179;HSPC248	Q53FT3	1	0	0.165254	0	0.00449024		Q53FT3
Long form collapsin response mediator protein 1;cDNA FLJ45854 fis, clone OCBBF2024589, highly similar to Dihydropyrimidinase-related protein 1;Dihydropyrimidinase-related protein 1;Collapsin response mediator protein 1;cDNA FLJ37406 fis, clone BRAMY2028282, highly similar to Dihydropyrimidinase-related protein 1;Collapsin response mediator protein 1, isoform CRA_d;cDNA FLJ16285 fis, clone OCBBF20…	CRMP1;DPYSL1;hCG_39896	A0EJG6;B3KXQ5;Q14194;B3KT07;B3KV96;Q4W5F1;Q96I11	1	0	0.165333	0	0.00449448		A0EJG6
Putative uncharacterized protein RAN;RAN, member RAS oncogene family, isoform CRA_c;GTP-binding nuclear protein Ran;GTPase Ran;Ras-related nuclear protein;Ras-like protein TC4;Androgen receptor-associated protein 24;RAN, member RAS oncogene family, isoform CRA_b;cDNA FLJ78394, highly similar to Homo sapiens RAN, member RAS oncogene family (RAN), mRNA;cDNA, FLJ92821, Homo sapiens RAN, member RAS o…	RAN;ARA24;OK/SW-cl.81;hCG_1744585	B5MDF5;P62826;A8K3Z8	1	0.409642	0.202118	0.104896	0.00450293		B5MDF5
Actin-related protein 2/3 complex subunit 1A;SOP2-like protein;Actin related protein 2/3 complex, subunit 1A, 41kDa;Actin related protein 2/3 complex, subunit 1A, 41kDa, isoform CRA_b;Actin related protein 2/3 complex subunit 1A variant;Putative uncharacterized protein ARPC1A;cDNA FLJ57124, highly similar to Actin-related protein 2/3 complex subunit 1A	ARPC1A;SOP2L;hCG_19476;tcag7.660	Q92747;A4D276;Q53GB6;Q59GQ0;Q75MY0;B4DLQ7	1	0.132077	0.222724	0.228765	0.00450431		Q92747
Keratin, type I cytoskeletal 18;Cytokeratin-18;Keratin-18;Cell proliferation-inducing gene 46 protein;cDNA, FLJ94640, highly similar to Homo sapiens keratin 18 (KRT18), mRNA	KRT18;CYK18;PIG46	P05783;B2RA03	1	0	0.166397	0	0.00455172		P05783
Nucleosome assembly protein 1-like 4;Nucleosome assembly protein 2;Putative uncharacterized protein NAP1L4;cDNA, FLJ92975, highly similar to Homo sapiens nucleosome assembly protein 1-like 4 (NAP1L4), mRNA;cDNA FLJ59403, highly similar to Nucleosome assembly protein 1-like 4	NAP1L4;NAP2	Q99733;A8MZ22;B2R6J4;B4DS05;A8CGI3;A8MXH2	1	0.215488	0.0201407	0.138057	0.00463392		Q99733
THO complex subunit 4;Ally of AML-1 and LEF-1;Transcriptional coactivator Aly/REF;bZIP-enhancing factor BEF	THOC4;ALY;BEF	Q86V81	1	0	0.168137	0	0.00464611		Q86V81
Leucine-rich PPR motif-containing protein, mitochondrial;130 kDa leucine-rich protein;LRP 130;GP130;cDNA FLJ60080, highly similar to 130 kDa leucine-rich protein (LRP 130)	LRPPRC;LRP130	P42704;B4DSR0	1	0.603703	0.052601	0.106862	0.00466848		P42704
Putative uncharacterized protein SRPK2;SFRS protein kinase 2, isoform CRA_a;Serine/threonine-protein kinase SRPK2;Serine/arginine-rich protein-specific kinase 2;SFRS protein kinase 2;Serine/threonine-protein kinase SRPK3;Serine/arginine-rich protein-specific kinase 3;Serine/threonine-protein kinase 23;Muscle-specific serine kinase 1;Putative uncharacterized protein SRPK3;Serine/threonine kinase 2…	SRPK2;SRPK3;MSSK1;STK23	A6NF09;A8MVX2;A8MW44;P78362;Q9UPE1-1;Q9UPE1;A8MPY5;Q4F970;Q562F5;Q59GF4;Q9UPE1-2;A8MPP7	1	0	0.168618	0	0.00467235		A6NF09
Thioredoxin domain-containing protein 12;Thioredoxin-like protein p19;Endoplasmic reticulum protein ERp19;ERp18;hTLP19;cDNA PSEC0100 fis, clone NT2RP2002927, highly similar to Thioredoxin domain-containing protein 12 (EC 1.8.4.2);Thioredoxin domain containing 12 (Endoplasmic reticulum)	TXNDC12;TLP19;UNQ713/PRO1376;hCG_32717	O95881;B3KQS0	1	0	0.168764	0	0.00468031		O95881
CAD protein;Glutamine-dependent carbamoyl-phosphate synthase;Aspartate carbamoyltransferase;Dihydroorotase;Putative uncharacterized protein CAD	CAD	P27708;Q53SY7;Q53SZ4;Q96CK3	1	0	0.169314	0	0.00471044		P27708
Integrin alpha-V;Vitronectin receptor subunit alpha;Integrin alpha-V heavy chain;Integrin alpha-V light chain;Integrin, alpha V (Vitronectin receptor, alpha polypeptide, antigen CD51);cDNA FLJ57822, highly similar to Integrin alpha-V;ITGAV protein	ITGAV;MSK8;VNRA	P06756-1;P06756;B0LPF4;B4DYQ7;P06756-2;A5YM53	1	0.0603592	0.264878	0.104545	0.00478387		P06756
NADH dehydrogenase [ubiquinone] 1 beta subcomplex subunit 10;NADH-ubiquinone oxidoreductase PDSW subunit;Complex I-PDSW;NADH dehydrogenase (Ubiquinone) 1 beta subcomplex, 10, 22kDa, isoform CRA_b;cDNA FLJ78612, highly similar to Homo sapiens NADH dehydrogenase (ubiquinone) 1 beta subcomplex, 10, 22kDa (NDUFB10), mRNA;cDNA, FLJ92003, Homo sapiens NADH dehydrogenase (ubiquinone) 1 beta subcomplex, …	NDUFB10;hCG_42700	O96000;A8K761;Q96II6;Q96RX5	1	3.25639	0.0662653	0.410141	0.00479948		O96000
60S ribosomal protein L7a;Surfeit locus protein 3;PLA-X polypeptide;Ribosomal protein L7a;cDNA FLJ78489, highly similar to Homo sapiens ribosomal protein L7a (RPL7A), mRNA;Ribosomal protein L7a, isoform CRA_c;cDNA, FLJ92002, Homo sapiens ribosomal protein L7a (RPL7A), mRNA	RPL7A;SURF-3;SURF3;RP11-244N20.10-009;hCG_2032998;RP11-244N20.10-004	P62424;Q5T8U4;Q5T8U3	1	0.299313	0.0412087	0.0790321	0.00480394		P62424
Synaptic vesicle membrane protein VAT-1 homolog;cDNA FLJ75120, highly similar to Homo sapiens vesicle amine transport protein 1 homolog (T californica) (VAT1), mRNA;Vesicle amine transport protein 1 homolog (T californica), isoform CRA_a;cDNA, FLJ79487, highly similar to Synaptic vesicle membrane protein VAT-1homolog;cDNA FLJ39753 fis, clone SMINT2018343, highly similar to Synaptic vesicle membra…	VAT1;hCG_16957	Q99536;A8K345;B0AZP7;B3KUF8;B4DPX4	1	0.445279	0.117784	0.118355	0.0048384		Q99536
Tripeptidyl-peptidase 2;Tripeptidyl-peptidase II;Tripeptidyl aminopeptidase;Tripeptidyl peptidase II	TPP2;RP11-29B2.2-002	P29144;Q5VZU9	1	0.61022	0.0466058	0.113086	0.0048427		P29144
AFG3-like protein 2;Paraplegin-like protein;Similar to AFG3 ATPase family gene 3-like 2 (Yeast)	AFG3L2	Q9Y4W6;Q8TA92	1	1.19884	0.108867	0.116749	0.00490135		Q9Y4W6
Core histone macro-H2A.1;H2A.y;H2A/y;Medulloblastoma antigen MU-MB-50.205;Histone H2A;H2A histone family, member Y isoform 2 variant	H2AFY;MACROH2A1	O75367-1;O75367;O75367-2;B4DJC3;Q59FH0	1	0.648521	0.0679396	0.00692163	0.00497758		O75367
Eukaryotic translation initiation factor 2 subunit 2;Eukaryotic translation initiation factor 2 subunit beta;Eukaryotic translation initiation factor 2 beta;EIF2S2 protein;Eukaryotic translation initiation factor 2, subunit 2 beta, 38kDa;Eukaryotic translation initiation factor 2, subunit 2 beta, 38kDa, isoform CRA_b;cDNA, FLJ93495, highly similar to Homo sapiens eukaryotic translation initiation…	EIF2S2;EIF2B;hCG_2018881	P20042;B5BU01;Q3B7I9;Q6IBR8;Q96I16;A6NK07	1	0.103849	0.0934978	0.179871	0.00504776		P20042
Clathrin heavy chain 1;CLH-17;CLTC protein	CLTC;CLH17;CLTCL2;KIAA0034	Q00610-1;Q00610;Q49AL0;Q00610-2	1	0.349035	0.0899135	0.0670892	0.00506512		Q00610
Lipoamide acyltransferase component of branched-chain alpha-keto acid dehydrogenase complex, mitochondrial;Dihydrolipoyllysine-residue (2-methylpropanoyl)transferase;Dihydrolipoamide branched chain transacylase;BCKAD E2 subunit;Dihydrolipoamide branched chain transacylase E2;cDNA, FLJ93690, Homo sapiens dihydrolipoamide branched chain transacylase (E2component of branched chain keto acid dehydrog…	DBT;BCATE2;hCG_31837;RP11-305E17.3-002	P11182;B2R811;B4E1Q7;Q5VVL7	1	2.68248	0.217803	0.278397	0.00507917		P11182
Eukaryotic translation initiation factor 5;EIF5 protein;Eukaryotic translation initiation factor 5, isoform CRA_b;Putative uncharacterized protein DKFZp686K0727	EIF5;DKFZp686K0727;hCG_25496	P55010;Q05DF3;Q32Q19;Q53XB3;Q6IBU0	1	0.0798595	0.0313466	0.138321	0.00512613		P55010
Glucosidase 2 subunit beta;Glucosidase II subunit beta;Protein kinase C substrate 60.1 kDa protein heavy chain;80K-H protein;cDNA FLJ59211, highly similar to Glucosidase 2 subunit beta;cDNA FLJ78273, highly similar to Homo sapiens protein kinase C substrate 80K-H (PRKCSH), transcript variant 2, mRNA	PRKCSH;G19P1	P14314;B4DJQ5;A8K318	1	0.316882	0.084303	0.0439421	0.00517343		P14314
Endoplasmic reticulum resident protein ERp44;Thioredoxin domain-containing protein 4	ERP44;KIAA0573;TXNDC4;UNQ532/PRO1075	Q9BS26	1	0	0.177663	0	0.00517909		Q9BS26
E3 ubiquitin-protein ligase TRIM63;Tripartite motif-containing protein 63;Muscle-specific RING finger protein 1;RING finger protein 28;Striated muscle RING zinc finger protein;Iris RING finger protein;Ring finger protein 28;cDNA FLJ50813, highly similar to Ubiquitin ligase TRIM63 (EC 6.3.2.-)	TRIM63;IRF;MURF1;RNF28;SMRZ	Q969Q1;Q6NR77;B4DN95	1	0	0.177689	0	0.00518059		Q969Q1
Hexaprenyldihydroxybenzoate methyltransferase, mitochondrial;Dihydroxyhexaprenylbenzoate methyltransferase;3,4-dihydroxy-5-hexaprenylbenzoate methyltransferase	COQ3;UG0215E05	Q9NZJ6	1	2.65329	0.125995	0.343422	0.00530281		Q9NZJ6
LIM domain-binding protein 3;Z-band alternatively spliced PDZ-motif protein;Protein cypher	LDB3;KIAA0613;ZASP	O75112-2;O75112	1	3.94623	0.491119	0.117175	0.00531101		O75112
Nucleolin;Protein C23;cDNA FLJ38578 fis, clone HCHON2007674, highly similar to NUCLEOLIN;cDNA FLJ10452 fis, clone NT2RP1000966, highly similar to NUCLEOLIN;Nucleolin, isoform CRA_c;cDNA FLJ45706 fis, clone FEBRA2028457, highly similar to Nucleolin;NCL protein	NCL;hCG_33980	P19338;B3KTP9;B3KM80;Q6ZS99;Q9BQ02	1	0.188342	0.102309	0.0643954	0.00535713		P19338
			1	11.583	0.785188	1.43049	0.0053877
Adiponectin;Adipocyte, C1q and collagen domain-containing protein;30 kDa adipocyte complement-related protein;Adipocyte complement-related 30 kDa protein;ACRP30;Adipose most abundant gene transcript 1 protein;Gelatin-binding protein;cDNA FLJ78108, highly similar to Homo sapiens adiponectin, C1Q and collagen domain containing (ADIPOQ), mRNA;Adiponectin, C1Q and collagen domain containing;cDNA, FLJ…	ADIPOQ;ACDC;ACRP30;APM1;GBP28;hCG_1784052	Q15848;A8K660;B2R773	1	215.298	1.73205	38.5673	0.00543956		Q15848
Estrogen sulfotransferase;Sulfotransferase, estrogen-preferring;EST-1;SULT1E1 protein;Sulfotransferase family 1E, estrogen-preferring, member 1;cDNA, FLJ92529, Homo sapiens sulfotransferase, estrogen-preferring (STE), mRNA	SULT1E1;STE;hCG_38316	P49888;Q53X91	1	0	0.182286	0	0.00544769		P49888
AP-2 complex subunit alpha-2;Adapter-related protein complex 2 alpha-2 subunit;Adaptor protein complex AP-2 subunit alpha-2;Alpha2-adaptin;Plasma membrane adaptor HA2/AP2 adaptin alpha C subunit;Alpha-adaptin C;Clathrin assembly protein complex 2 alpha-C large chain;100 kDa coated vesicle protein C;Huntingtin-interacting protein J;Huntingtin yeast partner J;Putative uncharacterized protein DKFZp5…	AP2A2;ADTAB;CLAPA2;HYPJ;KIAA0899;DKFZp564D1864	O94973-2;O94973;O94973-1;Q9UFK5;O94973-3	1	0.245417	0.315135	0.270049	0.00549824		O94973
Dystrobrevin alpha;Dystrobrevin-alpha;Dystrophin-related protein 3;cDNA FLJ77455, highly similar to Homo sapiens dystrobrevin, alpha (DTNA), transcript variant 5, mRNA;Dystrobrevin, alpha, isoform CRA_g;cDNA FLJ61240, highly similar to Dystrobrevin alpha;Dystrobrevin alpha isoform 2 variant;Putative uncharacterized protein DTNA;DTNA protein;Dystrobrevin, alpha;Dystrobrevin, alpha, isoform CRA_i	DTNA;DRP3;hCG_2021826	Q9Y4J8-1;Q9Y4J8;A8MSZ0;Q9Y4J8-2;Q9Y4J8-3;A8K541;B4DGS6;Q9Y4J8-4;Q9Y4J8-5;Q59GK7;Q9Y4J8-7;A8MUY4;Q9BS59	1	3.94449	0.873241	0.804023	0.00551557		Q9Y4J8
Glycerol-3-phosphate dehydrogenase 1-like protein;cDNA FLJ43415 fis, clone OCBBF2025527, highly similar to Homo sapiens glycerol-3-phosphate dehydrogenase 1-like (GPD1L), mRNA	GPD1L;KIAA0089	Q8N335;B3KWN2	1	2.45236	0.256103	0.520831	0.00552904		Q8N335
14-3-3 protein epsilon;14-3-3 protein epsilon isoform transcript variant 1;cDNA FLJ51851, highly similar to 14-3-3 protein epsilon (14-3-3E);cDNA, FLJ79084, highly similar to 14-3-3 protein epsilon (14-3-3E);cDNA FLJ60092, highly similar to 14-3-3 protein epsilon (14-3-3E)	YWHAE	P62258;Q4VJB6;B4DJB0	1	0.306496	0.172317	0.0844496	0.00557298		P62258
Heterogeneous nuclear ribonucleoprotein Q;Synaptotagmin-binding, cytoplasmic RNA-interacting protein;Glycine- and tyrosine-rich RNA-binding protein;GRY-RBP;NS1-associated protein 1;cDNA, FLJ94136, highly similar to Homo sapiens synaptotagmin binding, cytoplasmic RNA interacting protein (SYNCRIP), mRNA;Synaptotagmin binding, cytoplasmic RNA interacting protein variant;Synaptotagmin binding, cytopl…	SYNCRIP;HNRPQ;NSAP1;RP1-3J17.2-002;hCG_401112;RP1-3J17.2-003	O60506-1;O60506;B2R8Z8;O60506-2;O60506-3;Q59GL1;Q5TCG3;O60506-4;Q05CK9;Q5TCG1;O60506-5	1	0	0.184774	0	0.00559489		O60506
Protein argonaute-2;Argonaute2;Protein slicer;PAZ Piwi domain protein;Eukaryotic translation initiation factor 2C 2;EIF2C2 protein	EIF2C2;AGO2	Q9UKV8;A4FVC0	1	0.0792246	0.301393	0.137221	0.00561219		Q9UKV8
Vacuolar protein sorting-associated protein 29;Vesicle protein sorting 29;PEP11;Putative uncharacterized protein DKFZp667O202	VPS29;DC7;DC15;MDS007;DKFZp667O202	Q9UBQ0-2;Q9UBQ0;Q9UBQ0-1;Q5JPE4	1	0.474962	0.0768627	0.121146	0.00562114		Q9UBQ0
cDNA FLJ58826, highly similar to Plasma protease C1 inhibitor;Plasma protease C1 inhibitor;C1 esterase inhibitor;C1-inhibiting factor;cDNA FLJ58564, highly similar to Plasma protease C1 inhibitor;Serine/cysteine proteinase inhibitor clade G member 1 splice variant 2	SERPING1;C1IN;C1NH	B4E1F0;P05155;B4E1H2;Q5UGI6	1	2.27588	0.592468	0.660719	0.0056996		B4E1F0
Carnitine O-palmitoyltransferase 1, liver isoform;Carnitine O-palmitoyltransferase I, liver isoform;Carnitine palmitoyltransferase 1A;cDNA, FLJ95058, highly similar to Homo sapiens carnitine palmitoyltransferase 1A (liver) (CPT1A),nuclear gene encoding mitochondrial protein, mRNA;Carnitine palmitoyltransferase I	CPT1A;CPT1	P50416-1;P50416;B2RAQ8;Q8WZ48;P50416-2	1	0.197291	0.196738	0.341718	0.00577303		P50416
EPM2A-interacting protein 1;Laforin-interacting protein	EPM2AIP1;KIAA0766;My007	Q7L775	1	0	0.187808	0	0.00577696		Q7L775
cDNA FLJ60677, highly similar to Splicing factor, arginine/serine-rich 7;cDNA FLJ34106 fis, clone FCBBF3008073, highly similar to SPLICING FACTOR, ARGININE/SERINE-RICH 7		B4DLU6;Q8NB80	1	0.0402659	0.19873	0.0697426	0.00577703		B4DLU6
Replication protein A 32 kDa subunit;RP-A p34;Replication factor A protein 2;cDNA, FLJ93412, highly similar to Homo sapiens replication protein A2, 32kDa (RPA2), mRNA;cDNA FLJ61154, highly similar to Replication protein A 32 kDa subunit;cDNA FLJ57152, highly similar to Replication protein A 32 kDa subunit;Replication protein A2, 32kDa	RPA2;REPA2;RPA32;RPA34;RP4-547C9.3-003	P15927-3;P15927;P15927-2;B2R7E8;P15927-1;B4DQD9;B4DUL2;Q5TEJ7	1	0	0.188427	0	0.00581442		P15927
Deoxyuridine 5'-triphosphate nucleotidohydrolase, mitochondrial;dUTP pyrophosphatase	DUT	P33316-1;P33316;A8K650;P33316-3;B4DPR5;P33316-2;Q6FHN1	1	0.275968	0.270836	0.179385	0.00582057		P33316
ATP synthase subunit delta, mitochondrial;F-ATPase delta subunit	ATP5D	P30049;Q6FG90	1	2.52137	0.171431	0.350009	0.00583854		P30049
Tubulin beta chain;Tubulin beta-5 chain;cDNA FLJ56903, highly similar to Tubulin beta-7 chain;Tubulin beta polypeptide;Tubulin, beta;Beta 5-tubulin;Beta-tubulin protein;Tubulin, beta, isoform CRA_a;MRNA encoding beta-tubulin. (from clone D-beta-1);cDNA FLJ50617, highly similar to Tubulin beta-7 chain;Beta-4 tubulin;cDNA FLJ52378, highly similar to Tubulin beta-7 chain;XTP3TPA-transactivated prote…	TUBB;TUBB5;OK/SW-cl.56;DAAP-285E11.4-001;DADB-118P11.3-001;DAMA-26D6.3-001;DAMC-316D20.4-001;DAQB-47P19.9-001;DASS-191K16.2-001;XXbac-BCX111D4.2-001;XXbac-BPG252P9.4-001;hCG_26016;DAAP-285E11.4-003;DADB-118P11.3-003;DAMA-26D6.3-003;DAMC-316D20.4-003;DAQB-47P19.9-003;DASS-191K16.2-003;XXbac-BCX111D4.2-003;XXbac-BPG252P9.4-003;XTP3TPATP1;DAAP-285E11.4-002;DADB-118P11.3-002;DAMA-26D6.3-002;DAMC-316D…	P07437;B4DY90;Q5SU16;Q6LC01;B4DQN9;Q5JP53;A4UCU2;B4E052;Q1KSF8;Q5ST81;Q6P602;Q96B85;Q9BUU9;B4DMU8;B4DXZ5	1	0.106948	0.210901	0.0642401	0.00585535		P07437
PABPC4 protein;Poly(A) binding protein, cytoplasmic 4 (Inducible form);Poly(A) binding protein, cytoplasmic 4 (Inducible form), isoform CRA_c;PABPC4 protein variant;Polyadenylate-binding protein 4;Inducible poly(A)-binding protein;Activated-platelet protein 1;Poly(A) binding protein, cytoplasmic 4 (Inducible form), isoform CRA_e;Polyadenylate binding protein II	PABPC4;RP11-69E11.6-002;hCG_2031827;APP1;PABP4;RP11-69E11.6-004;RP11-69E11.6-003	Q3B867;Q4VC03;Q53GL4;Q59GZ7;Q6IQ30;Q13310-1;Q13310;Q13310-2;B1ANR7;Q147Y3;B1ANR0;Q15164	1	0.303503	0.108282	0.0617204	0.00588088		Q3B867
Ras-related protein Rab-2A;RAB2, member RAS oncogene family, isoform CRA_a;cDNA, FLJ92663, Homo sapiens RAB2, member RAS oncogene family (RAB2), mRNA;cDNA FLJ51998, highly similar to Ras-related protein Rab-2A;RAB2	RAB2A;RAB2;hCG_40714	P61019;B2R5W8;B4DMQ5;O75546	1	0.582965	0.0722014	0.129238	0.0059642		P61019
Actin-related protein 2/3 complex subunit 4;Arp2/3 complex 20 kDa subunit;cDNA, FLJ96107, highly similar to Homo sapiens tubulin tyrosine ligase-like family, member 3 (TTLL3),mRNA;cDNA FLJ14048 fis, clone HEMBA1006650, weakly similar to ARP2/3 COMPLEX 20 KD SUBUNIT	ARPC4;ARC20	P59998;B2RCJ2;Q9H7Z5	1	0.434662	0.0637836	0.106585	0.00599828		P59998
Eukaryotic peptide chain release factor subunit 1;TB3-1;Protein Cl1;Eukaryotic translation termination factor 1, isoform CRA_a;cDNA, FLJ92875, Homo sapiens eukaryotic translation termination factor 1 (ETF1),mRNA;ETF1 protein;Eukaryotic translation termination factor 1;Eukaryotic translation termination factor 1, isoform CRA_b	ETF1;ERF1;RF1;SUP45L1;hCG_1981800	P62495;B2R6B4;Q96CG1	1	0.0719395	0.295211	0.124603	0.00605539		P62495
cDNA FLJ77570, highly similar to Homo sapiens pleckstrin homology domain containing, family C (with FERM domain) member 1 (PLEKHC1), mRNA;KINDLIN2 isoform 2;Fermitin family homolog 2;Pleckstrin homology domain-containing family C member 1;Kindlin-2;Mitogen-inducible gene 2 protein	FERMT2;KIND2;MIG2;PLEKHC1	A8K6S3;B5TJY2;Q96AC1-1;Q96AC1;Q96AC1-2	1	0.504643	0.100201	0.061055	0.00610375		A8K6S3
Protein bicaudal D homolog 2	BICD2;KIAA0699	Q8TD16-2;Q8TD16;Q8TD16-1	1	0	0.193425	0	0.00612126		Q8TD16
Myomesin-1;Myomesin family member 1;190 kDa titin-associated protein;190 kDa connectin-associated protein;EH-myomesin	MYOM1	P52179-1;P52179;Q9NZL8	1	1.86505	0.29138	0.421453	0.00613485		P52179
Serine/threonine-protein kinase MARK2;MAP/microtubule affinity-regulating kinase 2;ELKL motif kinase;EMK1;PAR1 homolog;cDNA FLJ76779, highly similar to Homo sapiens MAP/microtubule affinity-regulating kinase 2 (MARK2), transcript variant 1, mRNA;Ser/thr protein kinase Emk1/MARK2 isoform EMK1A;Ser/Thr protein kinase PAR-1Balpha splicing variant	MARK2;EMK1;Par1b	Q7KZI7-1;Q7KZI7;Q7KZI7-8;Q7KZI7-11;Q7KZI7-6;Q7KZI7-3;A8K2S4;Q7KZI7-12;Q7KZI7-9;Q7KZI7-4;Q5DNC6;Q7KZI7-5;Q7KZI7-2;A9CP04;Q7KZI7-7;Q7KZI7-10	1	0	0.193681	0	0.0061372		Q7KZI7
Hemoglobin gamma-G;Hemoglobin subunit gamma-2;Hemoglobin gamma-2 chain;Gamma-2-globin;Hemoglobin gamma-G chain;Hb F Ggamma;A-gamma-hemoglobin gene from Greek HPFH mutant, .;G-gamma-hemoglobin gene from Greek HPFH mutant, .;Hemoglobin, gamma A;Hemoglobin, gamma G;cDNA FLJ76540, highly similar to Homo sapiens hemoglobin, gamma G (HBG2), mRNA;Gamma-G globin;Gamma globin;A-gamma globin;G-gamma globin…	HBG2;HBG1;G-gamma	Q14491;P69892;Q14474;Q14476;Q96FH6;Q9UNL6;Q14403;A1EGU3;Q14402;Q14412;Q9UJ01	1	0.00308353	0.195818	0.00267638	0.00616719		Q14491
60S ribosomal protein L12;Ribosomal protein L12 variant	RPL12	P30050-1;P30050;Q59FI9;A6ND19;P30050-2;B5MCF0	1	0.278345	0.0993573	0.0464975	0.00619518		P30050
RNA-binding protein FUS;Oncogene FUS;Oncogene TLS;Translocated in liposarcoma protein;POMp75;75 kDa DNA-pairing protein;Fus-like protein;cDNA FLJ58049, highly similar to RNA-binding protein FUS;BBF2H7/FUS protein;Putative uncharacterized protein FUS	FUS;TLS	P35637-1;P35637;Q13344;P35637-2;B4DR70;Q70T18;A6NMX6	1	0	0.194971	0	0.00621771		P35637
GTPase-activating protein and VPS9 domain-containing protein 1;Rab5-activating protein 6;GAPex-5;GTPase activating protein and VPS9 domains 1;cDNA FLJ61592, highly similar to Homo sapiens GTPase activating protein and VPS9 domains 1 (GAPVD1), mRNA;cDNA FLJ13779 fis, clone PLACE4000445, highly similar to Homo sapiens GTPase activating protein and VPS9 domains 1 (GAPVD1), mRNA;cDNA FLJ52111, highly…	GAPVD1;GAPEX5;KIAA1521;RAP6;RP11-184B22.1-005;RP11-184B22.1-001;RP11-184B22.1-003;RP11-184B22.1-002;RP11-184B22.1-009;RP11-184B22.1-011	Q14C86-6;Q14C86;B0QZ65;Q14C86-1;Q14C86-2;B0QZ63;B4DK42;Q14C86-5;Q14C86-4;B0QZ64;B3KN67;Q14C86-3;B0QZ62;B4DGD8;B5MDH9;B0QZ66;B0QZ67	1	0	0.195498	0	0.00625071		Q14C86
Eukaryotic translation initiation factor 5B;Translation initiation factor IF-2;EIF5B protein;cDNA FLJ10524 fis, clone NT2RP2000880, highly similar to Eukaryotic translation initiation factor 5B;Putative uncharacterized protein IF2	EIF5B;IF2;KIAA0741	O60841;A0JLR8;B3KM86;Q05CQ1;Q53RV7;Q53SI8;Q8N5A0	1	0.0819193	0.32005	0.141888	0.0062788		O60841
39S ribosomal protein L30, mitochondrial;MRP-L30;MRP-L28;Mitochondrial ribosomal protein L30;HCG1989457, isoform CRA_c	MRPL30;MRPL28;RPML28;HSPC249;hCG_1989457	Q8TCC3-2;Q8TCC3;Q0D2Q7;Q8TCC3-1	1	0.250851	0.553598	0.434486	0.00630246		Q8TCC3
cDNA FLJ75459;cDNA FLJ76290, highly similar to Homo sapiens TIA1 cytotoxic granule-associated RNA bindingprotein-like 1 (TIAL1), transcript variant 1, mRNA;Nucleolysin TIAR;TIA-1-related protein;Aging-associated gene 7 protein;TIAL1 protein;T-cluster binding protein;TIA1 cytotoxic granule-associated RNA binding protein-like 1, isoform CRA_a;Putative uncharacterized protein TIAL1;cDNA FLJ57984, hi…	TIAL1;hCG_40603	A8K4L9;A8K5C4;Q01085;Q2TSD2;Q49AS9;O15187;A6NJN8;B4DHS3;Q59G49	1	0.133489	0.0906704	0.231209	0.00632165		A8K4L9
Chloride intracellular channel protein 4;Intracellular chloride ion channel protein p64H1;cDNA FLJ61180, highly similar to Chloride intracellular channel protein 4;CLIC4 protein;Chloride intracellular channel 4;Chloride intracellular channel 4, isoform CRA_b;cDNA, FLJ96000, Homo sapiens chloride intracellular channel 4 (CLIC4), mRNA;cDNA FLJ10762 fis, clone NT2RP4000008, moderately similar to CHL…	CLIC4;RP11-108J9.1-001;hCG_24047	Q9Y696;B4DWC4;Q6FIC5;Q9NVF8;B3KTR3	1	0.251079	0.21252	0.0693707	0.00634389		Q9Y696
116 kDa U5 small nuclear ribonucleoprotein component;U5 snRNP-specific protein, 116 kDa;Elongation factor Tu GTP-binding domain-containing protein 2;cDNA FLJ78483, highly similar to Homo sapiens elongation factor Tu GTP binding domain containing 2 (EFTUD2), mRNA;cDNA FLJ44500 fis, clone UTERU3000828, highly similar to 116 kDa U5 small nuclear ribonucleoprotein component;cDNA FLJ55341, highly simi…	EFTUD2;KIAA0031;SNRP116;U5-116KD	Q15029;A8KAP3;B3KX19;B4DMC0;Q6IBM8;B4DK30;B4DZB1;Q8IXJ3;B3KWY2	1	0	0.197533	0	0.00637901		Q15029
40S ribosomal protein S19;Ribosomal protein S19, isoform CRA_a;cDNA, FLJ92047, Homo sapiens ribosomal protein S19 (RPS19), mRNA;Ribosomal protein S19	RPS19;hCG_1995572	P39019;B0ZBD0;Q8WVX7	1	0.276974	0.122536	0.0217233	0.00639792		P39019
Vacuolar protein sorting-associated protein 53 homolog;Gastric cancer hepatocellular carcinoma suppressor 1 variant;Vps53 long isoform;cDNA FLJ76086;Vacuolar protein sorting 53 (Yeast), isoform CRA_d;cDNA FLJ35213 fis, clone PROST1000215, highly similar to Vacuolar protein sorting protein 53	VPS53;PP13624;HCCS1;hCG_27851	Q5VIR6-1;Q5VIR6;B1AA17;B3FH42;Q5VIR6-3;Q5VIR6-2;A8K2S8;B3KS06;B1AA15;B1AA16	1	0	0.197978	0	0.00640725		Q5VIR6
Crk-like protein;cDNA FLJ77301, highly similar to Homo sapiens v-crk sarcoma virus CT10 oncogene homolog (avian)-like (CRKL), mRNA;V-crk sarcoma virus CT10 oncogene homolog (Avian)-like, isoform CRA_a	CRKL;hCG_41272	P46109;A8KA44	1	0.205613	0.225851	0.356132	0.00652505		P46109
Cytochrome c oxidase subunit 4 isoform 1, mitochondrial;Cytochrome c oxidase subunit IV isoform 1;Cytochrome c oxidase polypeptide IV;Cytochrome c oxidase subunit IV isoform 1, isoform CRA_b;cDNA, FLJ92112, Homo sapiens cytochrome c oxidase subunit IV isoform 1 (COX4I1),mRNA;COX4I1 protein	COX4I1;COX4;hCG_17049	P13073;B2R4J2;Q6P666;Q86WV2	1	2.0765	0.280085	0.454842	0.00653031		P13073
26S proteasome non-ATPase regulatory subunit 5;26S proteasome subunit S5B;26S protease subunit S5 basic;cDNA FLJ76282, highly similar to Homo sapiens proteasome (prosome, macropain) 26S subunit, non-ATPase, 5 (PSMD5), mRNA;cDNA FLJ52877, highly similar to 26S proteasome non-ATPase regulatory subunit 5	PSMD5;KIAA0072	Q16401;A8K4T6;B4DZM8	1	0	0.199989	0	0.0065355		Q16401
Cysteine and histidine-rich domain-containing protein 1;CHORD domain-containing protein 1;Cysteine and histidine-rich domain (CHORD)-containing 1, isoform CRA_c;cDNA, FLJ93053, highly similar to Homo sapiens cysteine and histidine-rich domain (CHORD)-containing 1 (CHORDC1), mRNA;Uncharacterized bone marrow protein BM028	CHORDC1;CHP1;hCG_2032534	Q9UHD1-1;Q9UHD1;B2R6P8;Q9NZ93;Q9UHD1-2	1	0	0.200334	0	0.00655767		Q9UHD1
Syntaxin-7;cDNA FLJ53760, highly similar to Syntaxin-7	STX7	O15400-1;O15400;O15400-2;B4DH37	1	0	0.200736	0	0.00658346		O15400
Ras GTPase-activating protein-binding protein 2;G3BP-2;GAP SH3 domain-binding protein 2;cDNA FLJ75732, highly similar to Homo sapiens Ras-GTPase activating protein SH3 domain-binding protein 2 (G3BP2), transcript variant 2, mRNA;Ras-GTPase activating protein SH3 domain-binding protein 2, isoform CRA_a;cDNA FLJ76053, highly similar to Homo sapiens Ras-GTPase activating protein SH3 domain-binding p…	G3BP2;KIAA0660;hCG_22598	Q9UN86-1;Q9UN86;A8K6X1;Q9UN86-2;A8K6V7	1	0	0.202647	0	0.00670689		Q9UN86
Histone H3.3;Histone H3;Histone H3.1;H3/a;H3/b;H3/c;H3/d;H3/f;H3/h;H3/i;H3/j;H3/k;H3/l;Histone H3.2;H3/m;H3/o;Histone H3.1t;H3/g;Histone H3-like	H3F3A;H3.3A;H3F3;PP781;H3F3B;H3.3B;hCG_1984517;hCG_1989319;HIST1H3A;H3FA;HIST1H3B;H3FL;HIST1H3C;H3FC;HIST1H3D;H3FB;HIST1H3E;H3FD;HIST1H3F;H3FI;HIST1H3G;H3FH;HIST1H3H;H3FK;HIST1H3I;H3FF;HIST1H3J;H3FJ;HIST2H3A;HIST2H3C;H3F2;H3FM;HIST2H3D;HIST3H3;H3FT;hCG_1642602	P84243;A8K4Y7;B2R4P9;B2R6Y1;P68431;A5PLR1;Q71DI3;B4E380;Q16695;B2R5K3;Q6NXT2;B4DEB1	1	0.229818	0.119293	0.0865331	0.00672147		P84243
Spectrin beta chain, brain 1;Spectrin, non-erythroid beta chain 1;Beta-II spectrin;Fodrin beta chain;Spectrin beta non-erythrocytic 1;Spectrin, beta, non-erythrocytic 1, isoform CRA_d;cDNA FLJ55845, highly similar to Spectrin beta chain, brain 1;Spectrin, beta, non-erythrocytic 1, isoform CRA_c;Putative uncharacterized protein SPTBN1;Spectrin, beta, non-erythrocytic 1;Spectrin, beta, non-erythroc…	SPTBN1;SPTB2;hCG_17370	Q01082-1;Q01082;B2ZZ89;B4DIF8;Q01082-2;Q53RC4;Q01082-3;B2RP63;Q8WYB3	1	0.445452	0.107601	0.00909118	0.0067261		Q01082
cDNA FLJ13963 fis, clone Y79AA1001299, highly similar to Homo sapiens integrase interactor 1b protein (INI1B);SWI/SNF-related matrix-associated actin-dependent regulator of chromatin subfamily B member 1;Integrase interactor 1 protein;BAF47;SWI/SNF related, matrix associated, actin dependent regulator of chromatin, subfamily b, member 1;cDNA FLJ11357 fis, clone HEMBA1000201, highly similar to SWI…	SMARCB1;INI1;SNF5L1;hCG_41099	Q9H836;Q12824-1;Q12824;Q12824-2;Q17S11;B5MCL5;B4DRT1;B4E117	1	0	0.20313	0	0.00673828		Q9H836
Heterogeneous nuclear ribonucleoprotein H;Heterogeneous nuclear ribonucleoprotein H, N-terminally processed;Heterogeneous nuclear ribonucleoprotein H1 (H), isoform CRA_a;cDNA FLJ42539 fis, clone BRACE3004150, highly similar to Heterogeneous nuclear ribonucleoprotein H;cDNA FLJ58205, highly similar to Heterogeneous nuclear ribonucleoprotein H';Putative uncharacterized protein DKFZp686A15170	HNRNPH1;HNRPH;HNRPH1;hCG_96156;DKFZp686A15170	P31943;B3KW86;B4DP00;Q68DG4	1	0.245046	0.142991	0.125085	0.0067541		P31943
Prolow-density lipoprotein receptor-related protein 1;Alpha-2-macroglobulin receptor;Apolipoprotein E receptor;Low-density lipoprotein receptor-related protein 1 85 kDa subunit;Low-density lipoprotein receptor-related protein 1 515 kDa subunit;Low-density lipoprotein receptor-related protein 1 intracellular domain;Low density lipoprotein-related protein 1 variant;LRP protein;Alpha-2 macroglobulin…	LRP1;A2MR;APR;LRP	Q07954;Q59FG2;Q6LAF4;Q6LBN5	1	0.0459279	0.269702	0.0795495	0.00677379		Q07954
Ubiquinone biosynthesis protein COQ9, mitochondrial;cDNA FLJ76610;HCG2025883, isoform CRA_c;cDNA FLJ57712, highly similar to Ubiquinone biosynthesis protein COQ9, mitochondrial;cDNA FLJ58968, highly similar to Ubiquinone biosynthesis protein COQ9, mitochondrial;cDNA FLJ60575, highly similar to Ubiquinone biosynthesis protein COQ9, mitochondrial	COQ9;C16orf49;HSPC326;PSEC0129;hCG_2025883	O75208-1;O75208;A8K3L2;B4DEE3;B4E0U3;B4DIV2	1	3.28354	0.259342	0.219711	0.00679306		O75208
Transferrin receptor protein 1;T9;p90;Transferrin receptor protein 1, serum form;cDNA FLJ75881, highly similar to Homo sapiens transferrin receptor (p90, CD71) (TFRC), mRNA;Transferrin receptor (P90, CD71);Transferrin receptor (P90, CD71), isoform CRA_a	TFRC;hCG_22086	P02786;A8K6Q8;Q1HE24	1	0.294909	0.115346	0.063845	0.00679856		P02786
Flavin reductase;NADPH-dependent diaphorase;NADPH-flavin reductase;Biliverdin reductase B;Biliverdin-IX beta-reductase;Green heme-binding protein	BLVRB;FLR	P30043	1	0.524534	0.272854	0.192904	0.00679934		P30043
ATP-binding cassette sub-family E member 1;RNase L inhibitor;Ribonuclease 4 inhibitor;2'-5'-oligoadenylate-binding protein;HuHP68	ABCE1;RLI;RNASEL1;RNASELI;RNS4I;OK/SW-cl.40	P61221	1	0.29986	0.127168	0.0632998	0.00685406		P61221
Calpain-2 catalytic subunit;Calpain-2 large subunit;Calcium-activated neutral proteinase 2;Calpain M-type;M-calpain;Millimolar-calpain;Calpain large polypeptide L2;cDNA, FLJ96158, highly similar to Homo sapiens calpain 2, (m/II) large subunit (CAPN2), mRNA;cDNA FLJ58517, highly similar to Calpain-2 catalytic subunit (EC 3.4.22.53);Calpain 2, large [catalytic] subunit variant;cDNA FLJ58224, highly…	CAPN2;CANPL2	P17655;B2RCM3;B4DN77;Q59EF6;A6NDG7;B4E1R7	1	0.36448	0.16993	0.142682	0.00690265		P17655
Neuron navigator 1;Steerin-1;Pore membrane and/or filament-interacting-like protein 3;Unc-53 homolog 1	NAV1;KIAA1151;KIAA1213;POMFIL3;STEERIN1	Q8NEY1-1;Q8NEY1;Q8NEY1-3;Q8NEY1-2;Q8NEY1-5;Q8NEY1-4;Q8NEY1-7	1	0	0.205687	0	0.00690549		Q8NEY1
Glutaredoxin-3;Thioredoxin-like protein 2;PKC-interacting cousin of thioredoxin;PKC-theta-interacting protein	GLRX3;PICOT;TXNL2;HUSSY-22	O76003;B3KMP7;B3KMQ5	1	0.057684	0.211212	0.0999117	0.00692954		O76003
Moesin;Membrane-organizing extension spike protein;MSN protein;Putative uncharacterized protein MSN	MSN	P26038;Q6PJT4;A8MZ70	1	0.268842	0.0890975	0.0635884	0.00693824		P26038
GTP:AMP phosphotransferase mitochondrial;Adenylate kinase 3;Adenylate kinase 3 alpha-like 1;cDNA FLJ42834 fis, clone BRCAN2019002, highly similar to GTP:AMP phosphotransferase mitochondrial (EC 2.7.4.10);GTP:AMP phosphotransferase;GTP:ATP phosphotransferase;cDNA FLJ58032, highly similar to GTP:AMP phosphotransferase mitochondrial (EC 2.7.4.10);cDNA FLJ40886 fis, clone UTERU2000663, highly similar…	AK3;AK3L1;AK6;AKL3L;RP11-6J24.4-001;hCG_2011468	Q9UIJ7;B3KWD9;Q7Z4Y4;Q7Z531;B4DP58;Q9HC01	1	3.48496	0.104439	0.435869	0.0069386		Q9UIJ7
Histone-binding protein RBBP4;Retinoblastoma-binding protein 4;Retinoblastoma-binding protein p48;Chromatin assembly factor 1 subunit C;Chromatin assembly factor I p48 subunit;CAF-I 48 kDa subunit;CAF-I p48;Nucleosome-remodeling factor subunit RBAP48;Retinoblastoma binding protein 4, isoform CRA_a;cDNA, FLJ92946, Homo sapiens retinoblastoma binding protein 4 (RBBP4), mRNA;cDNA FLJ53908, highly si…	RBBP4;RBAP48;hCG_2032433	Q09028;B2R6G9;B4DRH0;B4DRT0	1	0.0867211	0.115488	0.0761511	0.00694104		Q09028
Nestin;NES protein	NES;Nbla00170	P48681;Q2YDX4;A5PKT9;Q05BW3	1	0.249063	0.0991153	0.057425	0.00697941		P48681
Transmembrane protein 173;Stimulator of interferon genes protein;Mediator of IRF3 activation;Mitochondrial mediator of IRF3 activation	TMEM173;MITA;STING	Q86WV6;B6EB35	1	0	0.206857	0	0.00698256		Q86WV6
Microfibrillar-associated protein 2;Microfibril-associated glycoprotein 1;MFAP2 protein;Microfibrillar-associated protein 2, isoform CRA_d;Microfibrillar-associated protein 2 variant	MFAP2;MAGP1;hCG_25122;RP1-37C10.2-003	P55001;Q53X60;Q5JXY0	1	0	0.206985	0	0.00699109		P55001
Eukaryotic translation initiation factor 4B;cDNA FLJ54492, highly similar to Eukaryotic translation initiation factor 4B;EIF4B protein;cDNA FLJ59206, highly similar to Eukaryotic translation initiation factor 4B;cDNA FLJ59405, highly similar to Eukaryotic translation initiation factor 4B	EIF4B	P23588;B4DRM3;Q7Z5Y0;B4DEP6;B4DS13	1	0	0.206999	0	0.00699198		P23588
6-phosphofructo-2-kinase/fructose-2,6-biphosphatase 2;PFK-2/FBPase-2;6PF-2-K/Fru-2,6-P2ASE heart-type isozyme;6-phosphofructo-2-kinase;Fructose-2,6-bisphosphatase;6-phosphofructo-2-kinase/fructose-2, 6-bisphosphatase 2 transcript variant 3;Putative uncharacterized protein DKFZp781D2217;cDNA FLJ53941, highly similar to 6-phosphofructo-2-kinase/fructose-2,6-biphosphatase 2;6-phosphofructo-2-kinase/…	PFKFB2;DKFZp781D2217;RP11-164O23.2-002;hCG_1723938	O60825-1;O60825;B0FLL2;Q68DE0;O60825-2;B4DY91;Q5VVQ3;B4DI16	1	7.86045	0.108922	1.42922	0.00699424		O60825
Methylcrotonoyl-CoA carboxylase subunit alpha, mitochondrial;3-methylcrotonyl-CoA carboxylase 1;3-methylcrotonyl-CoA:carbon dioxide ligase subunit alpha;3-methylcrotonyl-CoA carboxylase biotin-containing subunit;cDNA FLJ54709, highly similar to Methylcrotonoyl-CoA carboxylase subunit alpha, mitochondrial (EC 6.4.1.4);Putative uncharacterized protein DKFZp686B20267;cDNA FLJ53328, highly similar to…	MCCC1;MCCA;DKFZp686B20267	Q96RQ3;B4DH16;Q68D27;B4DHW5	1	1.77784	0.20388	0.24666	0.00703337		Q96RQ3
Triosephosphate isomerase;Triose-phosphate isomerase	TPI1;TPI	P60174-1;P60174;Q53HE2;Q6FHP9;B4DUI5;P60174-2;Q2QD09	1	0.577488	0.0618519	0.0325375	0.00704852		P60174
Septin-8;Putative uncharacterized protein SEPT8	SEPT8;KIAA0202	Q92599-1;Q92599;A6NKP6;A6NC65;A6NFQ9;A6NMH6;Q92599-2;Q92599-3	1	0	0.207954	0	0.00705528		Q92599
Sodium/potassium-transporting ATPase subunit alpha-2;Na(+)/K(+) ATPase alpha-2 subunit;cDNA, FLJ95053, highly similar to Homo sapiens ATPase, Na+/K+ transporting, alpha 2 (+) polypeptide(ATP1A2), mRNA;ATPase, Na+/K+ transporting, alpha 2 (+) polypeptide;cDNA FLJ34298 fis, clone FEBRA2006357, highly similar to Sodium/potassium-transporting ATPase alpha-2 chain (EC 3.6.3.9);Na+/K+ transporting ATPa…	ATP1A2;KIAA0778;RP11-536C5.4-003;RP11-536C5.4-008	P50993;B2RAQ4;B1AKY9;B3KRI1;Q58I22;B1AKZ0;B3KW93;B3KX35;B4DIQ8	1	7.7277	0.310096	1.56064	0.00708415		P50993
cDNA FLJ14622 fis, clone NT2RP2000147, highly similar to Adaptor-related protein complex 1 mu-1 subunit;Leukemia T cell specific adaptor-related protein 1 mu1 subunit;Adaptor-related protein complex 1, mu 1 subunit variant;AP-1 complex subunit mu-1;Adaptor-related protein complex 1 mu-1 subunit;Adaptor protein complex AP-1 mu-1 subunit;Golgi adaptor HA1/AP1 adaptin mu-1 subunit;Mu-adaptin 1;AP-mu…	AP1M1;CLTNM	B3KNH5;Q4TTY5;Q59EK3;Q9BXS5;B4DDG7	1	0	0.208556	0	0.00709534		B3KNH5
Actin, cytoplasmic 2;Gamma-actin;Actin, cytoplasmic 2, N-terminally processed;cDNA FLJ55253, highly similar to Actin, cytoplasmic 1;cDNA FLJ57283, highly similar to Actin, cytoplasmic 2;Actin-like protein;ACTG1 protein;Putative uncharacterized protein	ACTG1;ACTB;ACTG;ACT	P63261;B4DW52;B4E3A4;Q562L3;Q562L5;Q562L6;Q562L9;Q562M3;Q562M5;Q562N0;Q562N2;Q562N8;Q562P0;Q562R8;Q562U1;Q562U2;Q562V5;Q562X9;Q562Y6;Q562Y8;Q562Z4;Q562Z6;Q562Z7;Q6PJ43;Q8WVW5	1	0.275125	0.120585	0.0432514	0.00723194		P63261
LETM1 and EF-hand domain-containing protein 1, mitochondrial;Leucine zipper-EF-hand-containing transmembrane protein 1	LETM1	O95202;B4DED2	1	2.20159	0.0377672	0.261964	0.00725984		O95202
Cell division cycle 5-like protein;Pombe cdc5-related protein;cDNA FLJ16777 fis, clone BRHIP2029567, highly similar to Cell division cycle 5-like protein;cDNA FLJ51295, highly similar to Cell division cycle 5-like protein	CDC5L;KIAA0432;PCDC5RP	Q99459;B3KY60;B4DSH1	1	0	0.211022	0	0.00726048		Q99459
Lamina-associated polypeptide 2, isoforms beta/gamma;Thymopoietin, isoforms beta/gamma;Thymopoietin-related peptide isoforms beta/gamma;Thymopoietin;Splenin;Thymopentin;TP5;Lamina-associated polypeptide 2, isoforms beta/gamma variant;Thymopoietin zeta isoform	TMPO;LAP2	P42167-1;P42167;Q59G12;P42167-2;A2T926	1	0.314256	0.239267	0.0978801	0.00727556		P42167
Delta(3,5)-Delta(2,4)-dienoyl-CoA isomerase, mitochondrial;cDNA FLJ75741, highly similar to Homo sapiens enoyl Coenzyme A hydratase 1, peroxisomal (ECH1),mRNA;Enoyl Coenzyme A hydratase 1, peroxisomal, isoform CRA_d	ECH1;hCG_20523	Q13011;A8K745	1	1.88752	0.155431	0.173047	0.00730093		Q13011
Striatin;STRN protein	STRN	O43815-1;O43815;Q3B874;O43815-2	1	0	0.211939	0	0.00732229		O43815
GPI transamidase component PIG-S;Phosphatidylinositol-glycan biosynthesis class S protein;cDNA, FLJ95416, highly similar to Homo sapiens phosphatidylinositol glycan, class S (PIGS), mRNA;cDNA PSEC0119 fis, clone PLACE1002376, highly similar to GPI transamidase component PIG-S;cDNA FLJ58583, highly similar to GPI transamidase component PIG-S;Putative uncharacterized protein DKFZp686K20216;PIGS pro…	PIGS;UNQ1873/PRO4316;DKFZp686K20216	Q96S52-1;Q96S52;B2RBB2;Q8NBL9;Q96S52-2;B4DLL0;Q6MZW5;Q96IR5;Q96NG1;Q9BVC1	1	0	0.21203	0	0.00732846		Q96S52
Keratin, type II cytoskeletal 8;Cytokeratin-8;Keratin-8;cDNA FLJ77754, highly similar to Homo sapiens keratin 8 (KRT8), mRNA;Keratin 8, isoform CRA_c;cDNA, FLJ79475, highly similar to Keratin, type II cytoskeletal 8;KRT8 protein	KRT8;CYK8;hCG_43758	P05787;A8K4H3;B0AZN5;Q7L4M3;Q969I0	1	0	0.212299	0	0.00734668		P05787
Polyribonucleotide nucleotidyltransferase 1, mitochondrial;PNPase 1;Polynucleotide phosphorylase-like protein;PNPase old-35;3'-5' RNA exonuclease OLD35	PNPT1;PNPASE	Q8TCS8	1	1.5255	0.230309	0.279742	0.00739166		Q8TCS8
Heat shock protein HSP 90-alpha;HSP 86;Renal carcinoma antigen NY-REN-38;cDNA FLJ31884 fis, clone NT2RP7002906, highly similar to Homo sapiens heat shock 90 kDa protein 1, alpha (HSPCA), transcript variant 1, mRNA;Full-length cDNA 5-PRIME end of clone CS0DN005YI08 of Adult brain of Homo sapiens (human);Heat shock protein 90kDa alpha (Cytosolic), class A member 1, isoform CRA_a;cDNA FLJ75475, high…	HSP90AA1;HSP90A;HSPC1;HSPCA;hCG_1814169	P07900-2;P07900;B3KPJ9;Q86SX1;P07900-1;A8K500;Q2VPJ6;Q86U12;Q8TBA7;Q96HX7;O75322	1	0.300351	0.172741	0.0467975	0.00740334		P07900
Putative uncharacterized protein MYOM3;Myomesin-3;Myomesin family member 3	MYOM3	A6NI63;Q5VTT5-1;Q5VTT5;A6NIU4;Q5VTT5-2	1	17.2779	0.622984	2.8567	0.00741709		A6NI63
CUG-BP- and ETR-3-like factor 1;Bruno-like protein 2;RNA-binding protein BRUNOL-2;CUG triplet repeat RNA-binding protein 1;Deadenylation factor CUG-BP;50 kDa nuclear polyadenylated RNA-binding protein;Embryo deadenylation element-binding protein homolog;cDNA FLJ61559, highly similar to CUG triplet repeat RNA-binding protein 1	CUGBP1;BRUNOL2;CELF1;CUGBP;NAB50	Q92879-4;Q92879;Q92879-1;B4E2U5;Q92879-3;Q92879-2	1	0.134572	0.271332	0.233085	0.00743447		Q92879
U4/U6.U5 tri-snRNP-associated protein 2;U4/U6.U5 tri-snRNP-associated 65 kDa protein;Inactive ubiquitin-specific peptidase 39;SAD1 homolog;cDNA FLJ75565, highly similar to Homo sapiens ubiquitin specific peptidase 39 (USP39), mRNA;Ubiquitin specific peptidase 39, isoform CRA_a;cDNA FLJ10185 fis, clone HEMBA1004509, highly similar to U4/U6.U5 tri-snRNP-associated protein 2;cDNA FLJ10910 fis, clone…	USP39;CGI-21;HSPC332;PRO2855;hCG_34614	Q53GS9;A8K086;B3KM40;B3KMG1;B3KPG7;B4DHT4	1	0	0.215135	0	0.00753981		Q53GS9
Tubulin beta-6 chain;cDNA FLJ35358 fis, clone PUAEN2000497, highly similar to Tubulin beta-6 chain;Tubulin, beta 6, isoform CRA_a;TUBB6 protein	TUBB6;hCG_1641604	Q9BUF5;B3KS31;Q2NKY5	1	0	0.215356	0	0.00755493		Q9BUF5
Endoplasmic reticulum-Golgi intermediate compartment protein 1;ER-Golgi intermediate compartment 32 kDa protein;cDNA FLJ56280, highly similar to Endoplasmic reticulum-Golgi intermediate compartment protein 1	ERGIC1;ERGIC32;KIAA1181;HT034	Q969X5-1;Q969X5;Q969X5-2;B4E0N6	1	0	0.215398	0	0.00755783		Q969X5
Translational activator GCN1;GCN1-like protein 1;cDNA FLJ54481, highly similar to GCN1-like protein 1	GCN1L1;KIAA0219	Q92616;B4DM32	1	0	0.216108	0	0.00760664		Q92616
Probable RNA-binding protein 20;RNA-binding motif protein 20;cDNA FLJ52690;RNA binding protein	RBM20	Q5T481;B4DZ92;B5A868	1	0.0342276	0.218081	0.0592839	0.0076857		Q5T481
A-kinase anchor protein 12;A-kinase anchor protein 250 kDa;Gravin;Myasthenia gravis autoantigen;AKAP12 protein;Putative uncharacterized protein AKAP12;Putative uncharacterized protein DKFZp686M0430	AKAP12;AKAP250;DKFZp686M0430	Q02952-1;Q02952;Q86TJ9;Q02952-3;A6NEC7;Q5CZB5;Q02952-2	1	0	0.217408	0	0.00769628		Q02952
Lamin-B1;Lamin B1, isoform CRA_b;cDNA, FLJ92980, Homo sapiens lamin B1 (LMNB1), mRNA;cDNA FLJ50934, highly similar to Lamin-B1;LMNB1 protein	LMNB1;LMN2;LMNB;hCG_27033	P20700;B2R6J6;B4DZT3;Q6DC98	1	0.0252993	0.203404	0.0438197	0.00770949		P20700
NADH-ubiquinone oxidoreductase chain 4;NADH dehydrogenase subunit 4	MT-ND4;MTND4;NADH4;ND4	P03905;A0S2M1;A0S2T6;A0SA68;A1DTS8;A1DU19;A1DUY6;A1DV51;A1Z4C6;A3R0J1;A4ZKZ6;A4ZL22;A4ZL74;A4ZLA0;A4ZLD9;A4ZLL7;A4ZLX0;A4ZMK1;A4ZML4;A4ZMM7;A4ZMU2;A4ZYF1;A6YWL5;A6Z2B4;A6Z4U7;A6ZBX6;A6ZER1;A6ZF01;A6ZGQ9;A6ZHA3;A6ZHM6;A6ZHN9;A8JMA7;A8JMY0;B0Z774;B1NU70;B1NUQ2;B1NUU1;B1W861;B1W8J1;B2CB43;B2CB95;B2D666;B2KLY6;B2XEX4;B2XG13;B2XHT2;B2XIK4;B2XIN0;B2XJG5;B2XLC7;B2XLK5;B2XQ96;B2XQV2;B2Y8X6;B2Y993;B2YA81;…	1	2.22896	0.419921	0.307601	0.00773456		P03905
Alpha-parvin;Calponin-like integrin-linked kinase-binding protein;CH-ILKBP;Matrix-remodeling-associated protein 2;Actopaxin	PARVA;MXRA2	Q9NVD7-1;Q9NVD7	1	0.327538	0.222443	0.287081	0.00780012		Q9NVD7
Uncharacterized protein KIAA0819	KIAA0819	O94909-2;O94909;O94909-1	1	0	0.218995	0	0.00780641		O94909
Septin-10;cDNA FLJ78458, highly similar to Homo sapiens septin 10 (SEPT10), transcript variant 1, mRNA;Putative uncharacterized protein SEPT10;cDNA FLJ34714 fis, clone MESAN2004288, highly similar to Septin-10;Septin 10, isoform CRA_g;Septin 10 isoform 2 variant;cDNA FLJ12620 fis, clone NT2RM4001714, moderately similar to SEPTIN 2 HOMOLOG;Putative uncharacterized protein DKFZp564M1416	SEPT10;hCG_27895;DKFZp564M1416	Q9P0V9-2;Q9P0V9;A8K7M3;B5ME97;Q9P0V9-1;B3KRQ9;Q59H84;Q9H9P7;Q9Y3S8	1	0	0.219217	0	0.00782187		Q9P0V9
5'-AMP-activated protein kinase catalytic subunit alpha-1	PRKAA1;AMPK1	Q13131-2;Q13131;Q13131-1	1	0	0.219254	0	0.00782449		Q13131
NADH dehydrogenase [ubiquinone] 1 beta subcomplex subunit 4;NADH-ubiquinone oxidoreductase B15 subunit;Complex I-B15;NADH dehydrogenase (Ubiquinone) 1 beta subcomplex, 4, 15kDa	NDUFB4	O95168;B2RUY3	1	2.89341	0.244146	0.39841	0.00788877		O95168
Heat shock protein beta-1;Heat shock 27 kDa protein;HSP 27;Stress-responsive protein 27;Estrogen-regulated 24 kDa protein;28 kDa heat shock protein;Heat shock 27kDa protein 1;cDNA, FLJ92160, Homo sapiens heat shock 27kDa protein 1 (HSPB1), mRNA;cDNA FLJ52243, highly similar to Heat-shock protein beta-1	HSPB1;HSP27;HSP28;hCG_1818101	P04792;B2R4N8;B4DL87	1	0.3973	0.199534	0.070722	0.00794292		P04792
SAP domain-containing ribonucleoprotein;Nuclear protein Hcc-1;Proliferation-associated cytokine-inducible protein CIP29;Cytokine-induced protein of 29 kDa;CIP29 protein;Similar to Nuclear protein Hcc-1 (HSPC316) (Proliferation associated cytokine-inducible protein CIP29)	SARNP;HCC1;HSPC316;CIP29;LOC402290;tcag7.1306	P82979;A8K393;Q567R9;A4D286	1	0	0.221508	0	0.0079823		P82979
Glutaredoxin-1;Thioltransferase-1;Glutaredoxin (Thioltransferase), isoform CRA_c;cDNA, FLJ92134, Homo sapiens glutaredoxin (thioltransferase) (GLRX), mRNA	GLRX;GRX;hCG_36838	P35754;B2R4L2	1	1.94395	0.115999	0.0955101	0.00806126		P35754
ACTN1 protein;cDNA FLJ59209, highly similar to Alpha-actinin-1;Actinin alpha 1 isoform b;cDNA FLJ40884 fis, clone UTERU2000607, highly similar to Alpha-actinin-1;Actinin 1 smooth muscle variant;Actinin, alpha 1, isoform CRA_e;cDNA FLJ53313, highly similar to Alpha-actinin-1;Full-length cDNA clone CS0DB009YA03 of Neuroblastoma of Homo sapiens (human);Alpha-actinin-1;Alpha-actinin cytoskeletal isof…	ACTN1;hCG_22243	A1L0V1;B4DHH3;Q1HE25;B3KUX9;B3V8S3;B4DFY0;Q86TX4;P12814;B4DRP5;Q5ZEZ4	1	0.301495	0.284599	0.128803	0.00810633		A1L0V1
FK506-binding protein 4;Peptidyl-prolyl cis-trans isomerase;HSP-binding immunophilin;FKBP52 protein;52 kDa FK506-binding protein;FKBP59;p59 protein;cDNA, FLJ94557, highly similar to Homo sapiens FK506 binding protein 4, 59kDa (FKBP4), mRNA	FKBP4	Q02790;B2R9U2	1	0	0.226005	0	0.00830163		Q02790
Splicing factor 3A subunit 3;Spliceosome-associated protein 61;SF3a60;cDNA FLJ78246, highly similar to Homo sapiens splicing factor 3a, subunit 3, 60kDa (SF3A3), mRNA;cDNA FLJ78053, highly similar to Homo sapiens splicing factor 3a, subunit 3, 60kDa (SF3A3), mRNA;cDNA FLJ46581 fis, clone THYMU3043200, highly similar to Splicing factor 3A subunit 3;Splicing factor 3a, subunit 3 variant;cDNA FLJ587…	SF3A3;SAP61	Q12874;A8K566;A8K7V1;B3KY12;Q53HM6;B4DW90	1	0	0.226289	0	0.00832196		Q12874
Small nuclear ribonucleoprotein-associated proteins B and B';Sm-B/Sm-B';Putative uncharacterized protein SNRPB;SNRPB protein;cDNA FLJ41124 fis, clone BRACE2014850, highly similar to Small nuclear ribonucleoprotein-associated protein N;Small nuclear ribonucleoprotein polypeptide N variant;Small nuclear ribonucleoprotein B';cDNA FLJ56740, highly similar to Small nuclear ribonucleoprotein-associated…	SNRPB;COD;SNRPB1;hCG_2039421;SNRPN;HCERN3;SMN	P14678-3;P14678;A8MT02;Q15182;B3KVR1;Q53HE7;Q9UIS4;P14678-1;B4DVS0;Q5XPV6;Q6IB35;P63162;Q6LBS1;Q9UKR4;P14678-2;B4DVD6;Q66K91	1	0	0.226542	0	0.00834015		P14678
FK506-binding protein 9;Peptidyl-prolyl cis-trans isomerase;FKBP9 protein;cDNA PSEC0007 fis, clone NT2RM1000634, highly similar to FK506-binding protein 9 (EC 5.2.1.8)	FKBP9;FKBP60;FKBP63	O95302;A7YQ73;B3KQQ0	1	0	0.22771	0	0.00842417		O95302
Histone H2A;Histone H2A type 1;Histone H2A type 1-B/E;H2A/m;H2A.2;H2A/a;Histone H2A type 1-C;H2A/l;Histone H2A type 2-A;H2A/o;Histone H2A type 3;Histone H2A type 1-D;H2A.3;H2A/g;Histone H2A type 2-C;H2A-GL101;H2A/q;Histone H2A.J;Histone H2A type 1-H;H2A/s;Histone H2A type 1-J	HIST1H2AG;H2AFP;HIST1H2AI;H2AFC;HIST1H2AK;H2AFD;HIST1H2AL;H2AFI;HIST1H2AM;H2AFN;hCG_1640463;hCG_1640467;hCG_1641458;hCG_1643754;hCG_1743060;HIST1H2AB;H2AFM;HIST1H2AE;H2AFA;hCG_1640984;hCG_1787383;HIST1H2AC;H2AFL;hCG_19120;HIST2H2AA3;H2AFO;HIST2H2AA;HIST2H2AA4;hCG_2036722;HIST3H2A;hCG_1640390;HIST1H2AD;H2AFG;HIST2H2AC;H2AFQ;H2AFJ;HIST1H2AH;hCG_1640359;HIST1H2AJ;H2AFE;hCG_1643194	B2R5B6;P0C0S8;A4FTV9;P04908;B2R5B3;Q08AJ9;Q93077;B2R4F7;Q6FI13;B2R5F0;Q7L7L0;B2R4S4;P20671;Q16777;Q9BTM1-1;Q9BTM1;Q96KK5;A3KPC7;B4E0B3;Q99878;A2RUU6;Q9BTM1-2	1	0.207343	0.0423525	0.221982	0.00845124		B2R5B6
Exportin-1;Chromosome region maintenance 1 protein homolog;cDNA FLJ42779 fis, clone BRAWH3005300, highly similar to Exportin-1;cDNA FLJ55480, highly similar to Exportin-1	XPO1;CRM1	O14980;B3KWD0;B4DR01	1	0.093434	0.12901	0.161832	0.00846909		O14980
Proteasome activator complex subunit 2;Proteasome activator 28 subunit beta;Activator of multicatalytic protease subunit 2;11S regulator complex subunit beta;Putative uncharacterized protein PSME2;Cell migration-inducing protein 22;PSME2 protein;Full-length cDNA clone CS0DJ015YJ12 of T cells (Jurkat cell line) of Homo sapiens (human)	PSME2	Q9UL46;A8MZ76;Q2TNB3;Q6FHK9;Q86SZ7	1	0.242589	0.435098	0.265499	0.00847293		Q9UL46
Radixin isoform b;Radixin isoform e;Radixin isoform f;Radixin, isoform CRA_a;Radixin isoform d;Radixin;Radixin, isoform CRA_b;cDNA, FLJ93349, Homo sapiens radixin (RDX), mRNA;RDX protein;Putative uncharacterized protein DKFZp434I0812	RDX;hCG_39182;DKFZp434I0812	A7YIJ8;A7YIK3;P35241;B0YJ88;Q05CU6;Q6PKD3;Q9NST9	1	0.301865	0.102088	0.261431	0.00856864		A7YIJ8
Heterogeneous nuclear ribonucleoprotein H3;Heterogeneous nuclear ribonucleoprotein H3 isoform a variant;cDNA FLJ76862, highly similar to Homo sapiens heterogeneous nuclear ribonucleoprotein H3 (2H9) (HNRPH3), transcript variant 2H9A, mRNA;Heterogeneous nuclear ribonucleoprotein H3 (2H9), isoform CRA_c;cDNA FLJ57726, highly similar to Heterogeneous nuclear ribonucleoprotein H3;cDNA FLJ34092 fis, c…	HNRNPH3;HNRPH3;hCG_32862	P31942-1;P31942;Q53F48;P31942-2;A8K682;P31942-3;B4DHY1;P31942-4;B3KRE1	1	0.144255	0.322721	0.12577	0.00861718		P31942
Tubulin alpha-1C chain;Tubulin alpha-6 chain;Alpha-tubulin 6;Tubulin alpha 6 variant;TUBA1C protein	TUBA1C;TUBA6	Q9BQE3;Q53GA7;Q8N532	1	0.099806	0.231198	0.0321032	0.00866314		Q9BQE3
Dynein, light chain, roadblock-type 1;cDNA FLJ59194, moderately similar to Dynein light chain 2A, cytoplasmic;Dynein light chain roadblock-type 1;Dynein light chain 2A, cytoplasmic;Dynein-associated protein Km23;Roadblock domain-containing protein 1;Bithoraxoid-like protein	DYNLRB1;RP5-914B9.1-004;BITH;DNCL2A;DNLC2A;ROBLD1;HSPC162	B1AKR6;B4DFR2;Q9NP97-1;Q9NP97	1	0.185973	0.30572	0.322115	0.00867857		B1AKR6
Pyruvate kinase isozymes M1/M2;Pyruvate kinase muscle isozyme;Pyruvate kinase 2/3;Cytosolic thyroid hormone-binding protein;THBP1;p58;M2-PK;Tumor M2-PK;Pyruvate kinase	PKM2;PK2;PK3;PKM	P14618-1;P14618;B2R5N8;B3KRY0;B4DFX8;P14618-2;B4DRT3;Q504U3	1	0.440203	0.0596924	0.106904	0.00888708		P14618
Protein mago nashi homolog 2;Protein mago nashi homolog	MAGOHB;MAGOH2;MAGOH	Q96A72;P61326;B2R5A2	1	0	0.234354	0	0.00890967		Q96A72
Platelet-activating factor acetylhydrolase IB subunit alpha;PAF acetylhydrolase 45 kDa subunit;PAF-AH alpha;PAFAH alpha;Lissencephaly-1 protein;Platelet-activating factor acetylhydrolase, isoform Ib, alpha subunit 45kDa;cDNA, FLJ93559, Homo sapiens platelet-activating factor acetylhydrolase, isoformIb, alpha subunit 45kDa (PAFAH1B1), mRNA	PAFAH1B1;LIS1;MDCR;MDS;PAFAHA;hCG_32975	P43034-1;P43034;B2R7Q7	1	0.553829	0.119521	0.132	0.00898194		P43034
Tyrosine-protein phosphatase non-receptor type 23;His domain-containing protein tyrosine phosphatase;Protein tyrosine phosphatase TD14;Protein tyrosine phosphatase, non-receptor type 23, isoform CRA_b;cDNA FLJ75567, highly similar to Homo sapiens protein tyrosine phosphatase, non-receptor type 23 (PTPN23), mRNA;cDNA FLJ58078, highly similar to Tyrosine-protein phosphatase non-receptortype 23 (EC …	PTPN23;KIAA1471;hCG_15429	Q9H3S7;A8K0D7;B4DST5;B4DJ12;B4DJ21	1	0	0.235885	0	0.00902335		Q9H3S7
Ankyrin repeat domain-containing protein 2;Skeletal muscle ankyrin repeat protein;cDNA, FLJ95632, Homo sapiens ankyrin repeat domain 2 (stretch responsive muscle)(ANKRD2), mRNA;Ankyrin repeat domain 2 (Stretch responsive muscle)	ANKRD2;ARPP;RP11-548K23.2-002	Q9GZV1-1;Q9GZV1;B2RBQ4;Q9GZV1-2;Q5T457	1	11.4108	1.73205	3.89517	0.0090681		Q9GZV1
Glycerol-3-phosphate dehydrogenase [NAD+], cytoplasmic;cDNA, FLJ92881, highly similar to Homo sapiens glycerol-3-phosphate dehydrogenase 1 (soluble) (GPD1), mRNA;cDNA FLJ57375, highly similar to Glycerol-3-phosphate dehydrogenase	GPD1	P21695;B2R6C0;B4DJ37	1	28.0151	1.73205	7.11529	0.00908313		P21695
Microtubule-associated protein 1S;BPY2-interacting protein 1;Microtubule-associated protein 8;Variable charge Y chromosome 2-interacting protein 1;MAP1S heavy chain;MAP1S light chain;cDNA FLJ77630, highly similar to Homo sapiens BPY2 interacting protein 1, mRNA;cDNA FLJ55328, highly similar to Homo sapiens BPY2 interacting protein 1 (BPY2IP1), mRNA	MAP1S;BPY2IP1;C19orf5;MAP8;VCY2IP1	Q66K74;A8K940;B4DH53	1	0	0.236805	0	0.00909193		Q66K74
NADH dehydrogenase [ubiquinone] 1 alpha subcomplex subunit 12;NADH-ubiquinone oxidoreductase subunit B17.2;Complex I-B17.2;13 kDa differentiation-associated protein;13kDa differentiation-associated protein variant;13kDa differentiation-associated protein	NDUFA12;DAP13	Q9UI09;Q53HG1;Q53XX0	1	3.36469	0.200605	0.751924	0.0091174		Q9UI09
DNA replication licensing factor MCM4;CDC21 homolog;P1-CDC21;cDNA FLJ12837 fis, clone NT2RP2003228, highly similar to DNA replication licensing factor MCM4;Minichromosome maintenance protein 4;cDNA FLJ54365, highly similar to DNA replication licensing factor MCM4	MCM4;CDC21	P33991;B3KMX0;A4FS09;B4DLA6	1	0	0.237152	0	0.00911789		P33991
Transmembrane protein 143;cDNA FLJ58915;cDNA FLJ57400;cDNA FLJ57548;cDNA FLJ58971;Putative uncharacterized protein FLJ10922;cDNA FLJ75515;cDNA FLJ57361	TMEM143;UNQ5922/PRO19813;FLJ10922;hCG_15259	Q96AN5-1;Q96AN5;B4DMR6;B4DMT0;B4DPF8;B4E130;Q96AN5-2;A8K656;B4DG49	1	3.16001	0.469853	0.970726	0.0091268		Q96AN5
cDNA FLJ76094, highly similar to Homo sapiens sarcoglycan, delta (35kDa dystrophin-associated glycoprotein) (SGCD), transcript variant 1, mRNA;Delta-sarcoglycan;SG-delta;35 kDa dystrophin-associated glycoprotein	SGCD	A8K9S9;Q92629	1	2.84913	0.260576	0.699994	0.0091619		A8K9S9
Protein transport protein Sec31A;SEC31-related protein A;SEC31-like 1;ABP125;ABP130;Web1-like protein;cDNA FLJ58531, highly similar to Homo sapiens SEC31-like 1 (SEC31L1), transcript variant 1, mRNA	SEC31A;KIAA0905;SEC31L1;HSPC275;HSPC334	O94979-8;O94979;O94979-1;O94979-2;B4DIW6;O94979-4;O94979-3;O94979-6;O94979-7	1	0	0.237836	0	0.00916912		O94979
Myosin-Ib;Myosin I alpha;MMI-alpha;MYH-1c;MYO1B variant protein;Myosin IB, isoform CRA_a;cDNA FLJ90497 fis, clone NT2RP3003874, highly similar to Myosin Ib	MYO1B;hCG_25797	O43795-1;O43795;B0I1S9;B3KQI2;O43795-2	1	0	0.238357	0	0.0092082		O43795
Ras-related protein Ral-A;V-ral simian leukemia viral oncogene homolog A (Ras related);V-ral simian leukemia viral oncogene homolog A (Ras related), isoform CRA_b;cDNA FLJ40085 fis, clone TESTI2002993	RALA;RAL;hCG_17213;tcag7.473	P11233;A4D1W3;Q8N836	1	0	0.239443	0	0.00929003		P11233
CCR4-NOT transcription complex subunit 1;Negative regulator of transcription subunit 1 homolog;CCR4-associated factor 1;cDNA FLJ32365 fis, clone PUAEN1000161, highly similar to Homo sapiens CCR4-NOT transcription complex, subunit 1 (CNOT1), transcript variant 2, mRNA;cDNA FLJ35566 fis, clone SPLEN2005474, highly similar to Homo sapiens CCR4-NOT transcription complex, subunit 1 (CNOT1), transcript…	CNOT1;CDC39;KIAA1007;NOT1;AD-005	A5YKK6-1;A5YKK6;B3KPW6;B3KS60;B4DYL7;A5YKK6-2;A5YKK6-3;A5YKK6-4;B4DTM8	1	0	0.239895	0	0.00932413		A5YKK6
Leucine-rich repeat-containing protein 47	LRRC47;KIAA1185	Q8N1G4	1	0.365352	0.0965417	0.0582971	0.00935784		Q8N1G4
Heterogeneous nuclear ribonucleoprotein L;cDNA, FLJ94229, highly similar to Homo sapiens heterogeneous nuclear ribonucleoprotein L (HNRPL),mRNA;HNRNPL protein;cDNA FLJ75895, highly similar to Homo sapiens heterogeneous nuclear ribonucleoprotein L (HNRPL), transcript variant 2, mRNA;Putative uncharacterized protein HNRNPL	HNRNPL;HNRPL;P/OKcl.14	P14866;B2R959;Q6NTA2;A6NIT8	1	0.175424	0.125647	0.0824525	0.00943899		P14866
FACT complex subunit SSRP1;Facilitates chromatin transcription complex subunit SSRP1;FACT 80 kDa subunit;FACTp80;Chromatin-specific transcription elongation factor 80 kDa subunit;Structure-specific recognition protein 1;Recombination signal sequence recognition protein 1;T160	SSRP1;FACT80	Q08945	1	0.0485892	0.208967	0.084159	0.00945966		Q08945
Heterogeneous nuclear ribonucleoprotein M;Heterogeneous nuclear ribonucleoprotein M isoform a variant;ORF protein;cDNA FLJ60435, highly similar to Heterogeneous nuclear ribonucleoprotein M;HNRPM protein;Putative uncharacterized protein DKFZp547H118	HNRNPM;HNRPM;NAGR1;ORF;DKFZp547H118	P52272-1;P52272;Q59ES8;Q7KYM9;P52272-2;B4DEG4;Q6P2D7;Q8TCM5	1	0.123646	0.122896	0.0922778	0.00947175		P52272
NADH-ubiquinone oxidoreductase chain 5;NADH dehydrogenase subunit 5;Urf4	MT-ND5;MTND5;NADH5;ND5	P03915;A0S2X6;A0S302;A0S468;A0S481;A0S4F9;A0S556;A0S8I1;A0S8Q9;A0S939;A0S952;A0S9B7;A0SB29;A0SBB9;A0SBH1;A0SBJ7;A0SBN6;A0SBQ0;A1DSD5;A1DSK0;A1DSU1;A1DSV4;A1DSY0;A1DT71;A1DT97;A1DTC3;A1DTD6;A1DTE9;A1DTP0;A1DTY1;A1DV00;A1DVN4;A1DVT6;A1DVU9;A1E1L3;A1Z4G6;A1Z4H9;A1Z4K5;A1Z550;A3FP67;A3R0J2;A3R0K5;A3R0L8;A3R0N1;A3R0P4;A4GYN5;A4ZHZ9;A4ZL36;A4ZL49;A4ZLA1;A4ZLB4;A4ZLC7;A4ZLE0;A4ZLL8;A4ZLT3;A4ZM22;A4ZMH6;…	1	2.55708	0.101649	0.278074	0.00949352		P03915
Laminin subunit beta-2;S-laminin;Laminin B1s chain	LAMB2;LAMS	P55268	1	1.43706	0.129958	0.229177	0.00958331		P55268
Ryanodine receptor 2;Cardiac muscle-type ryanodine receptor;Cardiac muscle ryanodine receptor-calcium release channel;cDNA FLJ54506, highly similar to Ryanodine receptor 2;cDNA FLJ61140, highly similar to Ryanodine receptor 2	RYR2	Q92736-1;Q92736;B4DGV4;B4DN98;Q92736-2	1	1.85852	0.268581	0.131548	0.00978435		Q92736
Serotransferrin;Siderophilin;Beta-1 metal-binding globulin;TF protein;cDNA FLJ56687, highly similar to Serotransferrin;cDNA FLJ54029, highly similar to Serotransferrin;Transferrin, isoform CRA_c;cDNA FLJ54111, highly similar to Serotransferrin;cDNA FLJ53691, highly similar to Serotransferrin;Transferrin;Transferrin, isoform CRA_d;Transferrin variant	TF;PRO1400;hCG_2023558	P02787;A0PJA6;B4DEX9;B4DHZ6;B4DI57;B4E1B2;Q06AH7;Q1HBA5;Q53H26	1	3.01637	0.194885	0.663502	0.00979245		P02787
Band 4.1-like protein 3;4.1B;Differentially expressed in adenocarcinoma of the lung protein 1;cDNA FLJ77757;cDNA, FLJ95236, highly similar to Homo sapiens differentially expressed in adenocarcinoma of the lung, mRNA;cDNA FLJ46689 fis, clone TRACH3012106, highly similar to Band 4.1-like protein 3	EPB41L3;DAL1;KIAA0987	Q9Y2J2-2;Q9Y2J2;A8K968;B2RB02;B3KY28;Q9Y2J2-1;Q9Y2J2-3	1	0	0.246878	0	0.0098587		Q9Y2J2
Ribosomal L1 domain-containing protein 1;Cellular senescence-inhibited gene protein;Protein PBK1;CATX-11;RSL1D1 protein;cDNA FLJ52304, highly similar to Ribosomal L1 domain-containing protein 1	RSL1D1;CATX11;CSIG;PBK1;L12	O76021;A0PJ87;B4DJ58;Q32Q62;A0PJ61	1	0	0.247271	0	0.00988917		O76021
Ran GTPase-activating protein 1;cDNA FLJ51385, highly similar to Ran GTPase-activating protein 1;cDNA FLJ61018, highly similar to Ran GTPase-activating protein 1;Similar to RAN GTPase activating protein 1;Putative uncharacterized protein	RANGAP1;KIAA1835;SD	P46060;B4DY16;B4E0U0;Q8WUS7;Q9BSK3	1	0	0.248301	0	0.00996928		P46060
Pyruvate dehydrogenase protein X component, mitochondrial;Dihydrolipoamide dehydrogenase-binding protein of pyruvate dehydrogenase complex;Lipoyl-containing pyruvate dehydrogenase complex component X;E3-binding protein;proX;cDNA, FLJ92818, highly similar to Homo sapiens pyruvate dehydrogenase complex, component X (PDHX), mRNA	PDHX;PDX1	O00330;B2R673	1	2.56725	0.119055	0.503573	0.00998054		O00330
cDNA FLJ59238, highly similar to SNW domain-containing protein 1;SNW domain-containing protein 1;Nuclear protein SkiP;Ski-interacting protein;Nuclear receptor coactivator NCoA-62;SNW domain containing 1, isoform CRA_c;cDNA FLJ76433, highly similar to Homo sapiens SNW domain containing 1 (SNW1), mRNA;cDNA FLJ51388, highly similar to SNW domain-containing protein 1;SNW1 protein;Nuclear receptor coa…	SNW1;SKIIP;SKIP;hCG_2028781	B4DEG7;Q13573;A8K8A9;B4DY36;Q0D2M5;Q6I9S2;Q6P151;Q9ULA6	1	0	0.248885	0	0.0100148		B4DEG7
Histidine triad nucleotide-binding protein 2;HINT-3;HIT-17kDa;PKCI-1-related HIT protein;PKCI-1-related HIT protein variant;Histidine triad nucleotide binding protein 2;Histidine triad nucleotide binding protein 2, isoform CRA_b;Protein kinase C inhibitor-2	HINT2;RP11-112J3.6-002;hCG_31368	Q9BX68;Q53HJ8;Q5TCW3;Q8WYJ5	1	2.9425	0.523235	0.965259	0.0100495		Q9BX68
Nucleolar protein 56;Nucleolar protein 5A;NOP56 protein;cDNA FLJ76962, highly similar to Homo sapiens nucleolar protein 5A (56kDa with KKE/D repeat) (NOL5A), mRNA;Nucleolar protein 5A (56kDa with KKE/D repeat)	NOP56;NOL5A;RP4-686C3.1-010	O00567;A0PJ92;A8K9K6;Q9BSN3;Q5JXT4	1	0	0.249747	0	0.0100823		O00567
LIM domain-binding protein 3;Z-band alternatively spliced PDZ-motif protein;Protein cypher;cDNA FLJ53288, moderately similar to LIM domain-binding protein 3;cDNA FLJ52572, highly similar to LIM domain-binding protein 3	LDB3;KIAA0613;ZASP	O75112-1;O75112;B4DGP4;O75112-5;B4DND5	1	1.62999	0.287944	0.13538	0.0100839		O75112
Transmembrane protein 126A;cDNA, FLJ92362	TMEM126A;hCG_27674	Q9H061;B2R570	1	10.2459	1.73205	4.02702	0.0101074		Q9H061
Protein KIAA1967;Deleted in breast cancer gene 1 protein;p30 DBC;cDNA FLJ38393 fis, clone FEBRA2007212	KIAA1967;DBC1	Q8N163-1;Q8N163;B3KTJ9;Q8N163-2	1	0.0635343	0.2614	0.069447	0.0101309		Q8N163
S-methyl-5'-thioadenosine phosphorylase;5'-methylthioadenosine phosphorylase;cDNA FLJ59758, highly similar to S-methyl-5-thioadenosine phosphorylase (EC 2.4.2.28);MTAP protein;Methylthioadenosine phosphorylase;Methylthioadenosine phosphorylase, isoform CRA_b	MTAP;MSAP;RP11-145E5.1-001;hCG_1810972	Q13126;B4DUC8;Q05DJ2;Q5T3P3;Q6FHP1;Q6FHT1	1	0.224148	0.240845	0.388235	0.0101393		Q13126
Malonyl-CoA decarboxylase, mitochondrial	MLYCD	O95822-1;O95822;O95822-2	1	3.30438	0.163318	0.511686	0.0102295		O95822
Insulin-like growth factor 2 mRNA-binding protein 2;IGF-II mRNA-binding protein 2;Hepatocellular carcinoma autoantigen p62;VICKZ family member 2;cDNA FLJ53054, highly similar to Insulin-like growth factor 2 mRNA-binding protein 2	IGF2BP2;IMP2;VICKZ2	A0A4Z0;B3FTN2;B3FTN3;Q9Y6M1;B3FTN4;B4DKT5	1	0	0.252273	0	0.0102809		A0A4Z0
Mu-crystallin homolog;NADP-regulated thyroid-hormone-binding protein;Putative uncharacterized protein DKFZp686P07163;cDNA FLJ77254, highly similar to Homo sapiens crystallin, mu (CRYM), mRNA;Crystallin, mu, isoform CRA_b	CRYM;THBP;DKFZp686P07163;hCG_38241	Q14894;Q5HYB7	1	8.04396	1.00771	1.03613	0.0102942		Q14894
Splicing factor, arginine/serine-rich 2;Splicing factor SC35;Splicing component, 35 kDa;Protein PR264;Splicing factor, arginine/serine-rich 2, isoform CRA_d;cDNA FLJ40890 fis, clone UTERU2001024, highly similar to SPLICING FACTOR, ARGININE/SERINE-RICH 2;Splicing factor, arginine/serine-rich 2, isoform CRA_a;cDNA FLJ42802 fis, clone BRCAN2002562, highly similar to Splicing factor, arginine/serine-…	SFRS2;hCG_27842;SFRS2B;SRP46	Q01130;B3KUY1;B3KWD5;Q53FN0;B4DN89;B3KVY2;Q8NAK9;B3KUF7;Q6NXQ0;Q8N220;B3KX15;Q9BRL6-1;Q9BRL6;B2R6B8;Q9BRL6-2;A8MVW9	1	0	0.252467	0	0.0102963		Q01130
Mitochondrial carnitine/acylcarnitine carrier protein;Carnitine/acylcarnitine translocase;Solute carrier family 25 member 20;cDNA FLJ53016, highly similar to Mitochondrial carnitine/acylcarnitine carrier protein	SLC25A20;CAC;CACT	O43772;B4DWZ5	1	2.65431	0.336187	0.180274	0.0103005		O43772
ATP-dependent DNA helicase 2 subunit 2;ATP-dependent DNA helicase II 80 kDa subunit;Lupus Ku autoantigen protein p86;86 kDa subunit of Ku antigen;Ku86;Ku80;Thyroid-lupus autoantigen;CTC box-binding factor 85 kDa subunit;Nuclear factor IV;DNA repair protein XRCC5;Putative uncharacterized protein XRCC5	XRCC5;G22P2	P13010;Q53TC2;Q53T09	1	0.127665	0.211916	0.00854951	0.0103027		P13010
cDNA FLJ57135, highly similar to Vitamin D-binding protein;Vitamin D-binding protein variant;Group-specific component (Vitamin D binding protein);cDNA FLJ78164, highly similar to Homo sapiens group-specific component (vitamin D binding protein), mRNA;cDNA, FLJ79502, highly similar to Vitamin D-binding protein;Vitamin D binding protein protein;Vitamin D-binding protein;Group-specific component;Gc-…	GC;hCG_17848;vitamin D binding protein	B4DPP2;Q53F31;Q6GTG1;Q6LDC6;P02774	1	3.19427	0.114764	0.52635	0.0103042		B4DPP2
Hemoglobin subunit delta;Hemoglobin delta chain;Delta-globin;Delta-globin chain;Hemoglobin delta;Hemoglobin, delta;Delta-globin B2 variant;Hemoglobin delta Etolia variant	HBD;hCG_1641001	P02042;A0N071;B2M1S8;Q4F786	1	46.0132	0.900428	11.0182	0.0103135		P02042
60S acidic ribosomal protein P0;L10E;cDNA FLJ75549, highly similar to Homo sapiens ribosomal protein, large, P0 (RPLP0), transcript variant 1, mRNA;Ribosomal protein P0 variant;60S acidic ribosomal protein P0-like;RPLP0 protein;cDNA FLJ51469, highly similar to 60S acidic ribosomal protein P0	RPLP0	P05388;A8K4Z4;Q53HK9;Q53HW2;Q8NHW5;Q3B7A4;Q6NSF2;B4E3D5;Q3MHV2	1	0.204973	0.226885	0.0326099	0.010394		P05388
Apolipoprotein A-IV;APOA4 protein	APOA4	P06727;Q13784;A8MSL6	1	4.47699	0.686463	1.51301	0.0104904		P06727
Carbonyl reductase [NADPH] 1;NADPH-dependent carbonyl reductase 1;Prostaglandin-E(2) 9-reductase;Prostaglandin 9-ketoreductase;15-hydroxyprostaglandin dehydrogenase [NADP+];Carbonyl reductase 1, isoform CRA_d;cDNA, FLJ95780, Homo sapiens carbonyl reductase 1 (CBR1), mRNA;Putative uncharacterized protein CBR1;cDNA FLJ60474, highly similar to Carbonyl reductase;Carbonyl reductase 1, isoform CRA_c	CBR1;CBR;CRN;hCG_401084	P16152;B2RBZ7;A8MTM1;B4DFK7	1	3.54136	0.549753	1.12516	0.0104942		P16152
Serine/threonine-protein kinase PAK 2;p21-activated kinase 2;Gamma-PAK;PAK65;S6/H4 kinase;p58;PAK-2p27;PAK-2p34;C-t-PAK2;cDNA FLJ75088, highly similar to Homo sapiens p21 (CDKN1A)-activated kinase 2 (PAK2), mRNA	PAK2	Q13177;A8K5M4	1	0.247809	0.301985	0.429218	0.0105719		Q13177
cDNA FLJ46359 fis, clone TESTI4049786, highly similar to Hexokinase-1 (EC 2.7.1.1);Hexokinase-1;Hexokinase type I;Brain form hexokinase;cDNA FLJ78173, highly similar to Homo sapiens hexokinase 1 (HK1) mRNA;Hexokinase 1;Hexokinase 1 isoform HKI variant;cDNA FLJ56506, highly similar to Hexokinase-1 (EC 2.7.1.1);Hexokinase;cDNA FLJ33948 fis, clone CTONG2018379, highly similar to Hexokinase-1 (EC 2.7…	HK1;RP11-404C6.1-003;HK1-tb;HK1-ta;RP11-404C6.1-016;RP11-404C6.1-004	B3KXY9;P19367-3;P19367;A8K7J7;B1AR61;P78542;Q59FD4;P19367-1;B4DG62;Q71V75;P19367-2;B1AR63;P19367-4;B1AR62;B3KRA9	1	0.653642	0.0829781	0.0806044	0.0106259		B3KXY9
NADH dehydrogenase [ubiquinone] 1 beta subcomplex subunit 9;NADH-ubiquinone oxidoreductase B22 subunit;Complex I-B22;LYR motif-containing protein 3;NADH dehydrogenase (Ubiquinone) 1 beta subcomplex, 9, 22kDa;cDNA, FLJ93971, Homo sapiens NADH dehydrogenase (ubiquinone) 1 beta subcomplex, 9,22kDa (NDUFB9), mRNA;Putative uncharacterized protein DKFZp566O173	NDUFB9;LYRM3;UQOR22;hCG_19780;DKFZp566O173	Q9Y6M9;B2R8M6;Q5JVG7;Q9UQS5	1	2.63207	0.308066	0.588955	0.0106433		Q9Y6M9
Tropomyosin 3;Tropomyosin alpha-3 chain;Tropomyosin-3;Gamma-tropomyosin;Tropomyosin-5;cDNA, FLJ96568, highly similar to Homo sapiens tropomyosin 3 (TPM3), mRNA;Putative uncharacterized protein DKFZp686J1372;Tropomyosin 3, isoform CRA_a;cDNA FLJ50612, highly similar to Rattus norvegicus tropomyosin 3, gamma (Tpm3), transcript variant 2, mRNA;Cytoskeletal tropomyosin isoform (2.5 kb);cDNA FLJ35393 …	TPM3;RP11-205M9.1-009;DKFZp686J1372;RP11-205M9.1-003;RP11-205M9.1-010;hCG_1997142;RP11-205M9.1-005;OK/SW-cl.5;RP11-205M9.1-011	Q5VU66;P06753-2;P06753;B2RDE1;Q2QD06;Q5HYB6;Q5VU59;Q5VU72;B4DQ80;Q5VU61;Q6LDX7;Q8NAG3;Q8NI98;B4DWT5;Q5VU63	1	0.480413	0.234008	0.114927	0.010684		Q5VU66
Gamma-glutamylcyclotransferase;Cytochrome c-releasing factor 21;cDNA FLJ11717 fis, clone HEMBA1005241	GGCT;C7orf24;CRF21	O75223-1;O75223;B3KMN7	1	0.334113	0.424693	0.578702	0.0106924		O75223
Lipoma-preferred partner;LIM domain-containing preferred translocation partner in lipoma;LIM domain containing preferred translocation partner in lipoma;LIM domain containing preferred translocation partner in lipoma, isoform CRA_a	LPP;hCG_17155	Q93052;A1L4L6	1	0.475781	0.1647	0.235351	0.0107067		Q93052
Protein-glutamine gamma-glutamyltransferase 2;Tissue transglutaminase;TGase C;Transglutaminase-2;TGase-H;cDNA FLJ58187, highly similar to Protein-glutamine gamma-glutamyltransferase 2(EC 2.3.2.13);cDNA FLJ57198, highly similar to Protein-glutamine gamma-glutamyltransferase 2 (EC 2.3.2.13);TGM2 protein;Transglutaminase 2 (C polypeptide, protein-glutamine-gamma-glutamyltransferase);Putative unchara…	TGM2;RP5-1054A22.2-004;DKFZp667H046	P21980-1;P21980;B4DIT7;B4DTN7;Q6B838;Q6DKH2;P21980-2;A2A299;Q9BXQ0;Q9H035	1	0.470549	0.21782	0.121204	0.0107099		P21980
Splicing factor 1;Zinc finger protein 162;Transcription factor ZFM1;Zinc finger gene in MEN1 locus;Mammalian branch point-binding protein mBBP;cDNA FLJ53344, highly similar to Splicing factor 1;cDNA FLJ54056, highly similar to Splicing factor 1;cDNA FLJ54064, highly similar to Splicing factor 1;ZFM1 protein, alternatively spliced product;Splicing factor 1, isoform CRA_b	SF1;ZFM1;ZNF162;hCG_23378	Q15637-5;Q15637;Q15637-1;B4DJU4;Q15637-2;Q15637-3;Q15637-6;Q15637-4;B4DSE4;B4DX42;Q14821;Q14820	1	0	0.258085	0	0.0107448		Q15637
Mitochondrial import receptor subunit TOM70;Mitochondrial precursor proteins import receptor;Translocase of outer membrane 70 kDa subunit;cDNA FLJ90621 fis, clone PLACE1002547, highly similar to Mitochondrial proteins import receptor;cDNA FLJ57240, highly similar to Mitochondrial proteins import receptor;cDNA FLJ90599 fis, clone PLACE1001340, highly similar to Mitochondrial proteins importreceptor	TOMM70A;KIAA0719	O94826;B3KQK5;B4DZ87;B3KQK0	1	0.552682	0.274353	0.172487	0.0107778		O94826
Mps one binder kinase activator-like 3;Preimplantation protein 3;Mob1 homolog 3;Class II mMOB1;2C4D;cDNA FLJ76596, highly similar to Homo sapiens preimplantation protein 3 (PREI3), transcript variant 2, mRNA;cDNA FLJ78747, highly similar to Homo sapiens preimplantation protein 3 (PREI3), transcript variant 1, mRNA;Preimplantation protein 3, isoform CRA_a;Putative uncharacterized protein tmp_locus…	MOBKL3;MOB3;PREI3;CGI-95;tmp_locus_8;hCG_20091	Q9Y3A3-1;Q9Y3A3;A8K012;Q53SE0;B4DML0;Q9Y3A3-2;B4DM50	1	0	0.259007	0	0.0108192		Q9Y3A3
60 kDa SS-A/Ro ribonucleoprotein;Ro 60 kDa autoantigen;TROVE domain family member 2;Sjoegren syndrome type A antigen;Sjoegren syndrome antigen A2;TROVE domain family, member 2, isoform CRA_b;cDNA, FLJ95429, highly similar to Homo sapiens Sjogren syndrome antigen A2 (60kDa, ribonucleoprotein autoantigen SS-A/Ro) (SSA2), mRNA;Gastric cancer multi-drug resistance protein variant;TROVE domain family,…	TROVE2;RO60;SSA2;hCG_41054;RP11-101E13.3-005;RP11-101E13.3-006;RP11-101E13.3-003;RP11-101E13.3-004	P10155-1;P10155;B2RBB9;Q86WL3;Q5LJ99;Q5LJA0;Q86WL4;Q5LJ98;Q5LJ97;P10155-2	1	0.156974	0.205929	0.218443	0.010822		P10155
T-complex protein 1 subunit delta;CCT-delta;Stimulator of TAR RNA-binding;T-complex protein 1, delta subunit;Putative uncharacterized protein CCT4	CCT4;CCTD;SRB	P50991;A8K3C3;B5MCQ1	1	0.238254	0.199872	0.119608	0.0108332		P50991
Farnesyl pyrophosphate synthetase;Farnesyl diphosphate synthetase;Dimethylallyltranstransferase;Geranyltranstransferase;Farnesyl pyrophosphate synthetase like-4 protein	FDPS;FPS;KIAA1293	P14324;Q14329	1	0	0.259181	0	0.0108333		P14324
DNA replication licensing factor MCM3;DNA polymerase alpha holoenzyme-associated protein P1;RLF subunit beta;P102 protein;P1-MCM3;cDNA, FLJ93378, highly similar to Homo sapiens MCM3 minichromosome maintenance deficient 3 (S. cerevisiae) (MCM3), mRNA;cDNA FLJ55751, highly similar to DNA replication licensing factor MCM3;cDNA FLJ50873, highly similar to DNA replication licensing factor MCM3;cDNA FL…	MCM3;hCG_22498;HCC5	P25205;B2R7C5;B4DS46;B4DUQ9;B4DWW4;Q53HJ4;Q8NHX6	1	0	0.259195	0	0.0108344		P25205
Actin filament-associated protein 1-like 1;cDNA FLJ61683, moderately similar to Lysosomal-associated multitransmembrane protein	AFAP1L1	Q8TED9-1;Q8TED9;Q8TED9-2;Q8TED9-4;B4E0C1	1	0	0.260852	0	0.0109688		Q8TED9
Catenin delta-1;p120 catenin;Cadherin-associated Src substrate;p120(cas);Putative uncharacterized protein DKFZp781O2021;CTNND1 protein;Catenin (Cadherin-associated protein), delta 1	CTNND1;KIAA0384;DKFZp781O2021	O60716-1;O60716;O60716-2;O60716-3;Q68DU0;O60716-5;O60716-9;O60716-10;O60716-11;O60716-13;O60716-4;O60716-6;O60716-7;O60716-8;O60716-12;O60716-14;O60716-17;O60716-15;O60716-18;O60716-16;O60716-19;O60716-21;Q96FS1;O60716-20;O60716-22;O60716-23;O60716-24;O60716-25;O60716-26;O60716-27;Q7KZJ3;O60716-29;O60716-28;O60716-30;O60716-31;O60716-32	1	0.362151	0.242583	0.256858	0.0109779		O60716
Ankyrin-2;Brain ankyrin;Ankyrin-B;Non-erythroid ankyrin	ANK2	Q7Z3L5	1	0.531422	0.0291755	0.0933362	0.0109981		Q7Z3L5
Small nuclear ribonucleoprotein Sm D3;snRNP core protein D3;Small nuclear ribonucleoprotein polypeptide D3 (Small nuclear ribonucleoprotein D3 polypeptide 18kDa);cDNA FLJ51872, highly similar to Small nuclear ribonucleoprotein Sm D3	SNRPD3;hCG_2043333	P62318;B5BU13;B4DJP7	1	0.0485505	0.211713	0.084092	0.0110923		P62318
Carnitine O-palmitoyltransferase 2, mitochondrial;Carnitine palmitoyltransferase II;cDNA, FLJ93082, Homo sapiens carnitine palmitoyltransferase II (CPT2), nuclear geneencoding mitochondrial protein, mRNA;Carnitine O-palmitoyltransferase II, mitochondrial variant	CPT2;CPT1;hCG_33393	P23786;B2R6S0;Q53G79	1	2.04938	0.275899	0.547572	0.0112879		P23786
RuvB-like 2;48 kDa TATA box-binding protein-interacting protein;TIP49b;Repressing pontin 52;51 kDa erythrocyte cytosolic protein;TIP60-associated protein 54-beta;INO80 complex subunit J;cDNA FLJ14856 fis, clone PLACE1001054, highly similar to RuvB-like 2 (EC 3.6.1.-);RuvB-like 2 (E. coli), isoform CRA_d;cDNA FLJ32936 fis, clone TESTI2007533, highly similar to RuvB-like 2 (EC 3.6.1.-);RuvB-like 2 …	RUVBL2;INO80J;TIP48;TIP49B;CGI-46;hCG_16214	Q9Y230;B3KNL2;B3KQ59	1	0.255919	0.0847315	0.135347	0.0113462		Q9Y230
Endoplasmin;Heat shock protein 90 kDa beta member 1;94 kDa glucose-regulated protein;gp96 homolog;Tumor rejection antigen 1;cDNA FLJ58812, highly similar to Endoplasmin (Heat shock protein 90kDa beta member 1);Tumor rejection antigen (Gp96) 1 variant;Tumor rejection antigen (Gp96) 1;HSP90B1 protein;cDNA FLJ58626, highly similar to Endoplasmin (Heat shock protein 90 kDa beta member 1)	HSP90B1;TRA1	P14625;B4DHT9;Q59FC6;Q5CAQ5;Q96GW1;B4DU71	1	0.215608	0.25051	0.0450016	0.0114009		P14625
ATP synthase subunit beta, mitochondrial;ATP synthase subunit beta	ATP5B;ATPMB;ATPSB;hCG_25000	P06576;A8K4X0;Q0QEN7	1	1.95324	0.185973	0.29939	0.0114223		P06576
Staphylococcal nuclease domain-containing protein 1;p100 co-activator;100 kDa coactivator;EBNA2 coactivator p100;Tudor domain-containing protein 11;cDNA, FLJ92620, highly similar to Homo sapiens staphylococcal nuclease domain containing 1 (SND1),mRNA;cDNA FLJ39264 fis, clone OCBBF2009603, highly similar to Staphylococcal nuclease domain-containing protein 1;EBNA-2 co-activator variant;cDNA FLJ545…	SND1;TDRD11	Q7KZF4;B2R5U1;B3KU67;Q59FF0;B4E299;Q86UF7	1	0.378409	0.234317	0.132146	0.0114353		Q7KZF4
Sodium/potassium-transporting ATPase subunit alpha-1;Na(+)/K(+) ATPase alpha-1 subunit;Na+/K+ transporting ATPase alpha 1 polypeptide;ATPase, Na+/K+ transporting, alpha 1 polypeptide	ATP1A1;RP4-655J12.1-006;RP4-655J12.1-002	P05023-1;P05023;Q58I23;Q5TC05;P05023-2;Q5TC01	1	0.49706	0.105988	0.0677161	0.0114621		P05023
Reticulon-4;Neurite outgrowth inhibitor;Foocen;Neuroendocrine-specific protein;Neuroendocrine-specific protein C homolog;RTN-x;Reticulon-5;NOGO-A;Putative uncharacterized protein RTN4;RTN4 isoform Aa;RTN4 isoform Ab;RTN4 isoform D;RTN4 isoform E;RTN4 isoform F;RTN4 isoform G;RNT4;Reticulon 4, isoform CRA_c;Reticulon 4, isoform CRA_f	RTN4;KIAA0886;NOGO;My043;SP1507;Nbla10545;hCG_1784307;Nbla00271	Q9NQC3-1;Q9NQC3;Q3LIF1;Q53RF4;Q8IUA4;Q9NQC3-4;Q3LIF4	1	0.279726	0.0243162	0.175913	0.0114672		Q9NQC3
Transmembrane 9 superfamily member 3;SM-11044-binding protein;EP70-P-iso;cDNA FLJ59136, highly similar to Transmembrane 9 superfamily protein member 3;SM-11044 binding protein (SMBP)(EP70-P-iso);SM-11044 binding protein, isoform CRA_a;cDNA FLJ90343 fis, clone NT2RP2002824, highly similar to Transmembrane 9 superfamily protein member 3;TM9SF3 protein;cDNA FLJ14882 fis, clone PLACE1003537, weakly s…	TM9SF3;SMBP;UNQ245/PRO282;RP11-34E5.1;RP11-34E5.1-001;hCG_25781;RP11-34E5.1-003	Q9HD45;B4DN13;Q5TB57;Q8NCC4;Q8WUB5;Q96JZ5;Q96K55;Q5TB53	1	0.0908432	0.0904734	0.157345	0.0115893		Q9HD45
cDNA FLJ45695 fis, clone FEBRA2013570, highly similar to 2-oxoisovalerate dehydrogenase alpha subunit, mitochondrial (EC 1.2.4.4);2-oxoisovalerate dehydrogenase subunit alpha, mitochondrial;Branched-chain alpha-keto acid dehydrogenase E1 component alpha chain;cDNA, FLJ93812, highly similar to Homo sapiens branched chain keto acid dehydrogenase E1, alphapolypeptide (maple syrup urine disease) (BCK…	BCKDHA;DKFZp313C0640	Q6ZSA3;P12694;B2R8A9;Q59EI3;Q9UMB3;B4DP47;Q658P7	1	1.69989	0.471645	0.620375	0.0116737		Q6ZSA3
Calcyclin-binding protein;Siah-interacting protein;S100A6-binding protein;Calcyclin binding protein;Growth-inhibiting gene 5 protein;cDNA, FLJ93790, Homo sapiens Siah-interacting protein (SIP), mRNA;Calcyclin binding protein, isoform CRA_a;cDNA FLJ36106 fis, clone TESTI2021531, highly similar to Calcyclin-binding protein	CACYBP;S100A6BP;SIP;PNAS-107;RP1-102G20.6-001;hCG_2024873;RP1-102G20.6-002	Q9HB71-1;Q9HB71;Q5R371;Q6NVY0;B3KSF1;Q5R370	1	0.0731474	0.22352	0.126695	0.0117106		Q9HB71
Protein transport protein Sec24B;SEC24-related protein B;cDNA FLJ61391, highly similar to Protein transport protein Sec24B;cDNA FLJ54322, highly similar to Protein transport protein Sec24B	SEC24B	O95487-1;O95487;O95487-2;B4DTM6;B4E2E1	1	0	0.270284	0	0.0117482		O95487
Collagen alpha-2(V) chain;cDNA FLJ60734, highly similar to Collagen alpha-2(V) chain;cDNA FLJ53096, highly similar to Collagen alpha-2(V) chain	COL5A2	P05997;B4DNJ0;B4DTC0	1	0.0368457	0.198098	0.0638186	0.0117667		P05997
Voltage-dependent anion-selective channel protein 1;Outer mitochondrial membrane protein porin 1;Plasmalemmal porin;Porin 31HL;Porin 31HM;cDNA FLJ38670 fis, clone HSYRA2000190, highly similar to Voltage-dependent anion-selective channel protein 1;cDNA FLJ16670 fis, clone THYMU3001133, highly similar to Voltage-dependent anion-selective channel protein 1;Voltage-dependent anion channel 1, isoform …	VDAC1;VDAC;hCG_1980917	P21796;B3KTS5;B3KVK4;B4DEI3	1	1.51428	0.234428	0.264249	0.0118477		P21796
Heterogeneous nuclear ribonucleoprotein U-like protein 2;Scaffold-attachment factor A2	HNRNPUL2;HNRPUL2	Q1KMD3	1	0.078494	0.196787	0.068651	0.0118688		Q1KMD3
Importin subunit beta-1;Karyopherin subunit beta-1;Nuclear factor P97;Importin-90;cDNA, FLJ95650, highly similar to Homo sapiens karyopherin (importin) beta 1 (KPNB1), mRNA;Karyopherin (Importin) beta 1;Karyopherin (Importin) beta 1, isoform CRA_a	KPNB1;NTF97;hCG_1773668	Q14974;B2RBR9;Q53XN2	1	0.323256	0.202074	0.0197646	0.0118773		Q14974
Heterogeneous nuclear ribonucleoproteins A2/B1	HNRNPA2B1;HNRPA2B1	P22626-1;P22626;P22626-2	1	0.170037	0.199549	0.0511073	0.0119164		P22626
Myozenin-2;Calsarcin-1;FATZ-related protein 2;cDNA, FLJ94486, highly similar to Homo sapiens myozenin 2 (MYOZ2), mRNA	MYOZ2;C4orf5	Q9NPC6;B2R9N7	1	2.69887	0.38899	0.417646	0.011917		Q9NPC6
Microtubule-actin cross-linking factor 1, isoform 4;Microtubule-actin crosslinking factor 1	MACF1;ABP620;ACF7;KIAA0465;KIAA1251;RP11-69E11.1-005	Q96PK2;B1ALC5	1	0	0.272366	0	0.0119234		Q96PK2
40S ribosomal protein S15;RIG protein;RIG homolog	RPS15;RIG	P62841;Q9UDC2	1	0	0.272426	0	0.0119285		P62841
Chromodomain-helicase-DNA-binding protein 4;ATP-dependent helicase CHD4;Mi-2 autoantigen 218 kDa protein;Mi2-beta;cDNA FLJ16830 fis, clone UTERU3022536, highly similar to Chromodomain helicase-DNA-binding protein 4 (EC 3.6.1.-);CHD4 protein	CHD4	Q14839-2;Q14839;Q14839-1;B3KY63;Q05CG6	1	0	0.272468	0	0.011932		Q14839
Activity-dependent neuroprotector homeobox protein;Activity-dependent neuroprotective protein;cDNA, FLJ95596, highly similar to Homo sapiens activity-dependent neuroprotector (ADNP), mRNA;Activity-dependent neuroprotector homeobox	ADNP;ADNP1;KIAA0784	Q9H2P0;B2RBM8;Q6DHZ8	1	0	0.273044	0	0.0119807		Q9H2P0
Alpha-centractin;Centrosome-associated actin homolog;Actin-RPV;ARP1;ARP1 actin-related protein 1 homolog A, centractin alpha (Yeast), isoform CRA_a;cDNA, FLJ92870, Homo sapiens ARP1 actin-related protein 1 homolog A, centractinalpha (yeast) (ACTR1A), mRNA;cDNA FLJ52695, highly similar to Alpha-centractin;cDNA FLJ52800, highly similar to Alpha-centractin;cDNA FLJ55002, highly similar to Alpha-cent…	ACTR1A;CTRN1;hCG_23005	P61163;B2R6B0;B4DMT4;B4DXP9;B4DM97	1	0.652326	0.147141	0.189995	0.0120049		P61163
Double-stranded RNA-binding protein Staufen homolog 1;cDNA FLJ75871, highly similar to Homo sapiens staufen, RNA binding protein (STAU), transcript variant T3, mRNA;Staufen isoform b variant;Staufen protein T4 variant;Staufen protein T5 variant;Staufen, RNA binding protein, homolog 1 (Drosophila);cDNA FLJ77242, highly similar to Homo sapiens staufen, RNA binding protein (STAU), transcript variant…	STAU1;STAU;RP3-470L14.2-006;hCG_37159;RP3-470L14.2-007	O95793-1;O95793;A8K622;Q59F99;Q5JW29;O95793-2;A8K9Z4;B3KRE0;B4DPJ9;Q5JW30	1	0.14468	0.0229867	0.250593	0.0120055		O95793
TATA-binding protein-associated factor 2N;RNA-binding protein 56;TAFII68;TAF(II)68;TAF15 RNA polymerase II, TATA box binding protein (TBP)-associated factor, 68kDa;TAF15 RNA polymerase II, TATA box binding protein (TBP)-associated factor, 68kDa, isoform CRA_b;cDNA, FLJ94920, Homo sapiens TAF15 RNA polymerase II, TATA box binding protein(TBP)-associated factor, 68kDa (TAF15), transcript variant 1,…	TAF15;RBP56;TAF2N;hCG_1992163	Q92804-1;Q92804;Q86X94;Q92804-2;B2R837;B4E312	1	0	0.274136	0	0.0120733		Q92804
Glutathione peroxidase 3;GSHPx-3;Extracellular glutathione peroxidase;Plasma glutathione peroxidase;GSHPx-P;GPX3 protein	GPX3;GPXP	P22352;Q6NXQ3	1	8.27572	0.323677	1.95854	0.0120845		P22352
Palmdelphin;Paralemnin-like protein	PALMD;C1orf11;PALML	Q9NP74-1;Q9NP74;Q9NP74-2;Q9NP74-3	1	5.98804	0.143204	1.47314	0.0120848		Q9NP74
26S proteasome non-ATPase regulatory subunit 8;26S proteasome regulatory subunit S14;p31;cDNA FLJ56327, highly similar to 26S proteasome non-ATPase regulatory subunit 8;Proteasome (Prosome, macropain) 26S subunit, non-ATPase, 8;cDNA FLJ52462, moderately similar to Mus musculus proteasome (prosome, macropain) 26S subunit, non-ATPase, 8 (Psmd8), mRNA	PSMD8;hCG_42853	P48556;B4DX18;Q5U0B3;B4E2Y4	1	0	0.274382	0	0.0120942		P48556
Isoleucyl-tRNA synthetase, cytoplasmic;Isoleucine--tRNA ligase;cDNA FLJ55373, highly similar to Isoleucyl-tRNA synthetase, cytoplasmic (EC 6.1.1.5);Isoleucyl-tRNA synthetase, cytoplasmic variant;Isoleucyl-tRNA synthetase;IARS protein;Putative uncharacterized protein DKFZp686L17145;Putative uncharacterized protein DKFZp686L0869;PRO0785	IARS;RP11-62C3.1-003;DKFZp686L17145;DKFZp686L0869	P41252;B4DVX2;Q59G75;Q5TCC4;Q7Z3T4;A8KAE9;Q7L4K8;Q7Z355;Q7Z3U5;Q9P1N9;Q6P0M4	1	0.121303	0.389377	0.210103	0.0121073		P41252
Gamma-adducin;Adducin-like protein 70;Adducin 3 (Gamma);Putative uncharacterized protein DKFZp686O0853;Adducin 3 (Gamma), isoform CRA_b;Adducin 3 isoform a variant;cDNA FLJ77558, highly similar to Homo sapiens adducin 3 (gamma) (ADD3), transcript variant 1, mRNA;Adducin 3 (Gamma), isoform CRA_a	ADD3;ADDL;DKFZp686O0853;RP11-252O7.3-002;hCG_1789399;RP11-252O7.3-001	Q9UEY8-2;Q9UEY8;Q5VU09;Q9UEY8-1;Q53FL4;Q59EK1;Q5VU08	1	0.267943	0.152955	0.23231	0.0121205		Q9UEY8
ELAV-like protein 1;Hu-antigen R;cDNA FLJ60076, highly similar to ELAV-like protein 1;ELAV (Embryonic lethal, abnormal vision, Drosophila)-like 1 (Hu antigen R);ELAV (Embryonic lethal, abnormal vision, Drosophila)-like 1 (Hu antigen R), isoform CRA_a	ELAVL1;HUR;hCG_22556	Q15717;B4DVB8;Q53XN6	1	0.0687935	0.172197	0.119154	0.0122771		Q15717
Beta-galactosidase;Acid beta-galactosidase;Elastin receptor 1;Putative uncharacterized protein GLB1;Lysosomal acid beta-galactosidase	GLB1;ELNR1	P16278-1;P16278;Q53G40;Q53H18;A8MZ11;P16278-2;Q16007	1	0	0.278252	0	0.0124251		P16278
Insulin-like growth factor 2 mRNA-binding protein 1;IGF-II mRNA-binding protein 1;Coding region determinant-binding protein;VICKZ family member 1;Zip code-binding protein 1	IGF2BP1;CRDBP;VICKZ1;ZBP1	Q9NZI8	1	0	0.278852	0	0.0124767		Q9NZI8
Succinate dehydrogenase [ubiquinone] iron-sulfur subunit, mitochondrial;Iron-sulfur subunit of complex II;Succinate dehydrogenase complex, subunit B, iron sulfur (Ip), isoform CRA_a;cDNA, FLJ92337, highly similar to Homo sapiens succinate dehydrogenase complex, subunit B, iron sulfur (Ip) (SDHB), mRNA;Succinate dehydrogenase complex subunit B;Succinate dehydrogenase complex, subunit B, iron sulfu…	SDHB;SDH;SDH1;hCG_25123	P21912;B2R545;Q0QEY7;Q70SX8	1	1.89069	0.315037	0.335153	0.0125023		P21912
Laminin subunit alpha-4;LAMA4 protein	LAMA4	Q16363-1;Q16363;Q16363-2;Q05CF9;Q5D044	1	0.358423	0.152138	0.0423425	0.0125035		Q16363
H5;Septin;H5 variant;Septin-5;Peanut-like protein 1;Cell division control-related protein 1;cDNA FLJ60582, highly similar to Septin-5;HCG2002594, isoform CRA_a;cDNA FLJ31711 fis, clone NT2RI2006412, highly similar to Rattus norvegicus CDCrel-1A;HCG2002594, isoform CRA_e;Putative uncharacterized protein	SEPT5;CDCrel-1;PNUTL1;hCG_2002594	Q7KYV2;Q99648;Q59GE1;Q99719;B4DJ62;Q96MY5;O95648	1	0	0.279392	0	0.0125233		Q7KYV2
40S ribosomal protein S23;cDNA FLJ77921, highly similar to Homo sapiens ribosomal protein S23 (RPS23), mRNA;Ribosomal protein S23, isoform CRA_a;cDNA, FLJ92033, Homo sapiens ribosomal protein S23 (RPS23), mRNA	RPS23;hCG_38189	P62266;A8K517	1	0.136265	0.345698	0.119094	0.0125631		P62266
Toll-like receptor adapter molecule 2 (TICAM-2) (Putative NF-kappa-B- activating protein 502).;Transmembrane emp24 domain-containing protein 7;cDNA FLJ57776, highly similar to Transmembrane emp24 domain-containing protein 7;TMED7 protein;cDNA FLJ90737 fis, clone PLACE1010827, moderately similar to Membrane protein p24B	TIRAP3;hCG_37564;TMED7;CGI-109	Q6JUT2;Q9Y3B3;B4E2C1;Q3B7W7;Q8NBU8	1	0.107293	0.272243	0.185836	0.0125714		Q6JUT2
cDNA FLJ51819, weakly similar to Long-chain-fatty-acid--CoA ligase (EC 6.2.1.3);Acyl-CoA synthetase family member 2, mitochondrial;cDNA FLJ54351, weakly similar to Long-chain-fatty-acid--CoA ligase (EC 6.2.1.3);cDNA FLJ50666, weakly similar to Long-chain-fatty-acid--CoA ligase (EC 6.2.1.3);cDNA FLJ50687, weakly similar to Long-chain-fatty-acid--CoA ligase (EC 6.2.1.3)	ACSF2;UNQ493/PRO1009	B4DFQ6;Q96CM8;B4DHT5;B4DTB9;B4DUF5	1	0.48373	0.0655716	0.0794943	0.0126397		B4DFQ6
Importin subunit alpha-7;Karyopherin subunit alpha-6;cDNA FLJ53998, highly similar to Importin alpha-7 subunit;cDNA FLJ53229, highly similar to Importin alpha-7 subunit;Karyopherin alpha 6 (Importin alpha 7);Importin subunit alpha-6;Karyopherin subunit alpha-5	KPNA6;IPOA7;RP4-622L5.1-004;KPNA5	O60684;B4DII5;B4DWX3;Q5TFJ7;O15131;B2RAI5	1	0.165583	0.0927089	0.145238	0.0126892		O60684
L-xylulose reductase;Dicarbonyl/L-xylulose reductase;Kidney dicarbonyl reductase;Carbonyl reductase II;Sperm surface protein P34H	DCXR	Q7Z4W1	1	3.46483	0.229518	0.465403	0.0127433		Q7Z4W1
Transitional endoplasmic reticulum ATPase;15S Mg(2+)-ATPase p97 subunit;Valosin-containing protein;cDNA, FLJ92615, highly similar to Homo sapiens valosin-containing protein (VCP), mRNA;VCP protein;Valosin-containing protein, isoform CRA_b;Putative uncharacterized protein DKFZp434K0126	VCP;RP11-182N22.1-001;hCG_20487;DKFZp434K0126	P55072;B2R5T8;Q0IIN5;Q0V924;Q2TAI5;Q96IF9;Q9HAP0;Q9HAP1;Q9NTC4	1	0.598549	0.055434	0.0644455	0.0127529		P55072
40S ribosomal protein S14;Ribosomal protein S14, isoform CRA_a;cDNA, FLJ92466, Homo sapiens ribosomal protein S14 (RPS14), mRNA	RPS14;PRO2640;hCG_38621	P62263;B2R5G5	1	0.208383	0.0340499	0.19738	0.0127755		P62263
Putative splicing factor, arginine/serine-rich 14;Arginine/serine-rich-splicing factor 14;cDNA FLJ76836, highly similar to Homo sapiens splicing factor, arginine/serine-rich 14 (SFRS14), transcript variant 2, mRNA;cDNA FLJ55365, highly similar to splicing factor, arginine/serine-rich14	SFRS14;KIAA0365	Q8IX01-1;Q8IX01;Q8IX01-4;A8K5G0;Q8IX01-3;B4DSQ4	1	0	0.283262	0	0.0128592		Q8IX01
Afamin;Alpha-albumin;cDNA FLJ76019, highly similar to Homo sapiens afamin (AFM), mRNA;Putative uncharacterized protein AFM	AFM;ALB2;ALBA;hCG_15198	P43652;A8K3E1;Q4W5C5	1	31.5472	0.911966	8.10174	0.0128776		P43652
Importin-7;Ran-binding protein 7;cDNA FLJ14581 fis, clone NT2RM4001382, highly similar to Importin-7;cDNA FLJ14986 fis, clone Y79AA1000784, highly similar to Importin-7;cDNA FLJ90427 fis, clone NT2RP3000481, highly similar to Importin-7	IPO7;RANBP7	O95373;B3KNG9;B3KQG6	1	0.258563	0.204429	0.0335357	0.0128858		O95373
Splicing factor 3B subunit 2;Pre-mRNA-splicing factor SF3b 145 kDa subunit;SF3b150;Spliceosome-associated protein 145;cDNA FLJ76788, highly similar to Homo sapiens splicing factor 3b, subunit 2, 145kDa (SF3B2), mRNA;cDNA FLJ56485, highly similar to Splicing factor 3B subunit 2;SF3B2 protein;Putative uncharacterized protein DKFZp781L0540	SF3B2;SAP145;DKFZp781L0540	Q13435;A8K485;B4DT19;Q7L4T5;Q7Z627;Q9BWD2;Q7Z3K9;Q96CM6	1	0	0.284586	0	0.0129751		Q13435
Transcription intermediary factor 1-beta;Tripartite motif-containing protein 28;Nuclear corepressor KAP-1;KRAB-associated protein 1;KRAB-interacting protein 1;RING finger protein 96;cDNA, FLJ94025, highly similar to Homo sapiens tripartite motif-containing 28 (TRIM28), mRNA	TRIM28;KAP1;RNF96;TIF1B	Q13263-1;Q13263;B2R8R5;Q13263-2	1	0.109399	0.205433	0.0953826	0.0129828		Q13263
60S ribosomal protein L15;Ribosomal protein L15	RPL15;EC45;TCBAP0781;hCG_1996483;RP11-511D14.1-001	P61313;B4DEN1;Q5U0C0;Q76N55;Q8N6E1;Q5T6E0;B4DLP4;Q642I1	1	0.250331	0.239818	0.145961	0.0130059		P61313
ATP synthase subunit O, mitochondrial;Oligomycin sensitivity conferral protein;ATP synthase	ATP5O;ATPO;hCG_2007796	P48047;B2R4E2;Q53HH2	1	2.57661	0.147068	0.426405	0.013063		P48047
NADH dehydrogenase [ubiquinone] 1 subunit C2;NADH-ubiquinone oxidoreductase subunit B14.5b;Complex I-B14.5b;Human lung cancer oncogene 1 protein;NADH dehydrogenase;Putative uncharacterized protein NDUFC2	NDUFC2;HLC1;hCG_1643251	O95298;Q549M5;Q6FIH8	1	2.24207	0.0760488	0.309219	0.0130708		O95298
Prefoldin subunit 6;Protein Ke2;Prefoldin subunit 6, isoform CRA_b;cDNA, FLJ92435, Homo sapiens HLA class II region expressed gene KE2 (HKE2), mRNA	PFDN6;HKE2;PFD6;DADB-159G18.5-004;DAMC-227D19.11-004;DAQB-193B15.2-001;XXbac-BCX165D10.2-004;XXbac-BPG185D15.3-004;hCG_17527;DADB-159G18.5-007;DAMC-227D19.11-007;DAQB-193B15.2-007;XXbac-BCX165D10.2-006;XXbac-BPG185D15.3-007	O15212;Q5STK2;A2AB88	1	0	0.286723	0	0.013163		O15212
Troponin I, slow skeletal muscle;Troponin I, slow-twitch isoform;cDNA FLJ41971 fis, clone SKMUS2007568, highly similar to TROPONIN I, SLOW SKELETAL MUSCLE	TNNI1	P19237;B3KW26	1	0.0398958	0.245082	0.0321076	0.0131886		P19237
cDNA, FLJ92904, highly similar to Homo sapiens casein kinase 2, alpha 1 polypeptide (CSNK2A1), mRNA;Casein kinase II alpha 1 subunit isoform a;CSNK2A1 protein;Casein kinase II subunit alpha;Casein kinase 2 alpha isoform;Casein kinase II alpha subunit;HCG21984;cDNA FLJ57289, highly similar to Casein kinase II subunit alpha (EC 2.7.11.1);Casein kinase 2, alpha 1 polypeptide, isoform CRA_b	CSNK2A1;CK2A1;hCG_21984;hCG_39868	B2R6D7;B5BUH5;Q5U5J2;P68400;Q5U065;Q2I0Y7;Q8NEV1;B4DYS6	1	0.0837398	0.182243	0.145042	0.0132178		B2R6D7
Non-POU domain-containing octamer-binding protein;54 kDa nuclear RNA- and DNA-binding protein;p54(nrb);55 kDa nuclear protein;NMT55;DNA-binding p52/p100 complex, 52 kDa subunit;cDNA FLJ76817, highly similar to Homo sapiens non-POU domain containing, octamer-binding (NONO), mRNA	NONO;NRB54	Q15233;A8K525	1	0.0891193	0.201221	0.109082	0.0132347		Q15233
cDNA FLJ41552 fis, clone COLON2004478, highly similar to Protein Tro alpha1 H,myeloma		Q6ZW64	1	2.58127	0.206666	0.256046	0.0132662		Q6ZW64
Proteasome subunit alpha type-7;Proteasome subunit RC6-1;Proteasome subunit XAPC7;Proteasome (Prosome, macropain) subunit, alpha type, 7	PSMA7;RP5-1005F21.4-006	O14818-2;O14818;Q5JXJ1	1	0.384826	0.334434	0.16892	0.0132832		O14818
Hsc70-interacting protein;Suppression of tumorigenicity protein 13;Putative tumor suppressor ST13;Protein FAM10A1;Progesterone receptor-associated p48 protein;Renal carcinoma antigen NY-REN-33;ST13 protein;Aging-associated protein 14b;Aging-associated protein 2;Suppression of tumorigenicity 13 (Colon carcinoma) (Hsp70 interacting protein);Suppression of tumorigenicity 13 (Colon carcinoma) (Hsp70 …	ST13;FAM10A1;HIP;SNC6;AAG2;hCG_1790973;FAM10A5;FAM10A4;RP3-408N23.5-003	P50502;Q0IJ56;Q1XBU6;Q2TU77;Q3KNR6;Q8NFI4;B4E0U6;A0AUJ6;Q1XBU7;Q8IZP2;B1AHN5	1	0.497144	0.179243	0.0811904	0.0133239		P50502
UTP--glucose-1-phosphate uridylyltransferase;UDP-glucose pyrophosphorylase;cDNA, FLJ95012, highly similar to Homo sapiens UDP-glucose pyrophosphorylase 2 (UGP2), mRNA;Putative uncharacterized protein UGP2;cDNA FLJ56155, highly similar to UTP--glucose-1-phosphate uridylyltransferase 2 (EC 2.7.7.9)	UGP2;UGP1	Q16851-1;Q16851;B2RAN1;Q53QE9;B4DUP2	1	0.590215	0.211956	0.219558	0.0133627		Q16851
Methionyl-tRNA synthetase, cytoplasmic;Methionine--tRNA ligase;cDNA FLJ76789, highly similar to Homo sapiens methionine-tRNA synthetase (MARS), mRNA;cDNA FLJ16674 fis, clone THYMU3008136, highly similar to Methionyl-tRNA synthetase (EC 6.1.1.10);cDNA FLJ53309, highly similar to Methionyl-tRNA synthetase (EC 6.1.1.10);cDNA FLJ55046, highly similar to Methionyl-tRNA synthetase (EC 6.1.1.10)	MARS	P56192;A8K492;B3KVK7;B4DF61;B4E0E9	1	0.227597	0.236025	0.0507602	0.0134535		P56192
DNA replication licensing factor MCM6;p105MCM;MCM6 minichromosome maintenance deficient 6 (MIS5 homolog, S. pombe) (S. cerevisiae);cDNA, FLJ92950, Homo sapiens MCM6 minichromosome maintenance deficient 6 (MIS5 homolog, S. pombe) (S. cerevisiae) (MCM6), mRNA;cDNA FLJ51591, highly similar to DNA replication licensing factor MCM6;Putative uncharacterized protein MCM6	MCM6;hCG_25753	Q14566;B2R6H2;B4DRF6;Q4ZG57;Q53T61	1	0	0.290653	0	0.0135118		Q14566
Myosin-XVIIIa;Myosin containing a PDZ domain;Molecule associated with JAK3 N-terminus;cDNA FLJ60372, highly similar to Myosin-18A;cDNA FLJ60377, highly similar to Myosin-18A;SP-A receptor subunit SP-R210 alphaS;cDNA FLJ16503 fis, clone FEBRA2008681, highly similar to Myosin-18A;HCG27198, isoform CRA_a;cDNA FLJ59676, highly similar to Myosin-18A;cDNA FLJ59649, highly similar to Myosin-18A;Jak3 N-t…	MYO18A;KIAA0216;MYSPDZ;hCG_27198;MAJN	Q92614-1;Q92614;Q92614-4;B4DYM1;B4DZ32;Q5QD01;Q92614-2;Q92614-3;B3KVF8;B4DFN7;B4E0T8;Q9NYE8;Q92614-5	1	0.32484	0.146427	0.0740652	0.0135486		Q92614
Core histone macro-H2A.2;Histone H2A	H2AFY2;MACROH2A2;RP11-367H5.3-002	Q9P0M6;Q9HA11;Q5SQT3	1	0.12876	0.118211	0.22302	0.0135499		Q9P0M6
NADH dehydrogenase [ubiquinone] 1 alpha subcomplex subunit 13;NADH-ubiquinone oxidoreductase B16.6 subunit;Complex I-B16.6;Gene associated with retinoic-interferon-induced mortality 19 protein;Cell death regulatory protein GRIM-19;cDNA FLJ59191, highly similar to NADH dehydrogenase (ubiquinone) 1 alpha subcomplex subunit 13 (EC 1.6.5.3);cDNA FLJ58045, highly similar to NADH dehydrogenase (ubiquin…	NDUFA13;GRIM19;CGI-39;CDA016	Q9P0J0;B4DF76;B4DQP1;B4DEZ3	1	1.97882	0.154603	0.160009	0.0136133		Q9P0J0
Vitronectin;Serum-spreading factor;V75;Vitronectin V65 subunit;Vitronectin V10 subunit;Somatomedin-B	VTN	P04004	1	1.88757	0.144313	0.401327	0.013615		P04004
Protein transport protein Sec23A;SEC23-related protein A;cDNA FLJ45429 fis, clone BRHIP3039057, highly similar to Protein transport protein Sec23A;cDNA FLJ55960, highly similar to Protein transport protein Sec23A;cDNA FLJ53608, highly similar to Protein transport protein Sec23A;cDNA FLJ52821, highly similar to Protein transport protein Sec23A	SEC23A	Q15436;B2R5P4;B3KXI2;B4DF60;B4DSQ5;B4E0Q9	1	0.25541	0.255722	0.0387505	0.0136163		Q15436
60 kDa heat shock protein, mitochondrial;Heat shock protein 60;60 kDa chaperonin;Chaperonin 60;Mitochondrial matrix protein P1;P60 lymphocyte protein;HuCHA60;Mitochondrial heat shock 60kD protein 1 variant 1;Putative uncharacterized protein HSPD1	HSPD1;HSP60	P10809;B2R5M6;B3GQS7;Q53QD5	1	0.578328	0.103403	0.0663972	0.0136234		P10809
Drebrin-like protein;Drebrin-F;SH3 domain-containing protein 7;Cervical SH3P7;HPK1-interacting protein of 55 kDa;Cervical mucin-associated protein;cDNA FLJ53677, highly similar to Drebrin-like protein;cDNA FLJ54066, highly similar to Drebrin-like protein;cDNA FLJ59481, highly similar to Drebrin-like protein;cDNA FLJ54071, highly similar to Drebrin-like protein;cDNA FLJ59941, highly similar to Dre…	DBNL;CMAP;SH3P7;PP5423	Q9UJU6-3;Q9UJU6;Q9UJU6-2;B4DXL9;Q9UJU6-1;B4DDU5;B4DEM2;B4DKZ4;B4DNX5;Q59FH4;B4DDD6;B4DUF9;B4DDP6	1	0.102629	0.189833	0.177759	0.0136313		Q9UJU6
cDNA FLJ40895 fis, clone UTERU2002294, highly similar to Prostaglandin E synthase 3 (EC 5.3.99.3);Prostaglandin E synthase 3 (Cytosolic), isoform CRA_c;Prostaglandin E synthase 3;Cytosolic prostaglandin E2 synthase;Telomerase-binding protein p23;Progesterone receptor complex p23;cDNA FLJ77524, highly similar to Homo sapiens prostaglandin E synthase 3 (cytosolic) (PTGES3), mRNA;Prostaglandin E syn…	PTGES3;hCG_2016483;P23;TEBP	B3KUY2;Q15185;A8K7D0;B4DP11;B4DP21;B4DHP2	1	0.307362	0.1824	0.0467737	0.0136512		B3KUY2
S-formylglutathione hydrolase;Esterase D	ESD	P10768	1	0.719089	0.0622859	0.108809	0.0136773		P10768
Annexin A5;Annexin-5;Annexin V;Lipocortin V;Endonexin II;Calphobindin I;Placental anticoagulant protein I;Placental anticoagulant protein 4;Thromboplastin inhibitor;Vascular anticoagulant-alpha;Anchorin CII;cDNA FLJ52002, highly similar to Annexin A5;ANXA5 protein;Annexin A5, isoform CRA_b;Putative uncharacterized protein ANXA5;cDNA, FLJ93030, Homo sapiens annexin A5 (ANXA5), mRNA	ANXA5;ANX5;ENX2;PP4;hCG_37353	P08758;B4DNG6;Q6FHB3;A8MTE3	1	0.250048	0.111389	0.108579	0.013701		P08758
Amine oxidase [flavin-containing] B;Monoamine oxidase type B;Monoamine oxidase B, isoform CRA_a;cDNA, FLJ93072, Homo sapiens monoamine oxidase B (MAOB), nuclear gene encoding mitochondrial protein, mRNA;Monoamine oxidase B	MAOB;hCG_16825	P27338;B2R6R3;Q8TBI1	1	2.15767	0.235246	0.209916	0.013772		P27338
Cullin-5;Vasopressin-activated calcium-mobilizing receptor;VACM-1;cDNA FLJ75330, highly similar to Homo sapiens cullin 5, mRNA;Cullin 5, isoform CRA_b;Putative uncharacterized protein CUL5	CUL5;VACM1;hCG_38058	Q93034;A8K960;A8MTD9	1	0.452314	0.122732	0.048124	0.013862		Q93034
Glucosamine-6-phosphate isomerase 1;Glucosamine-6-phosphate deaminase 1;Oscillin;cDNA FLJ76269, highly similar to Homo sapiens glucosamine-6-phosphate deaminase 1 (GNPDA1), mRNA;cDNA FLJ12717 fis, clone NT2RP1001253, highly similar to Glucosamine-6-phosphate isomerase (EC 3.5.99.6)	GNPDA1;GNPI;HLN;KIAA0060	P46926;A8K3S1;B3KMV2	1	0	0.294726	0	0.0138773		P46926
C-terminal-binding protein 2;C-terminal binding protein 2;CTBP2 protein	CTBP2;RP11-59C5.2-005	P56545-2;P56545;Q5SQP8;Q8IY44;P56545-1;Q1WIS0	1	0	0.294955	0	0.013898		P56545
Splicing factor 3B subunit 1;Pre-mRNA-splicing factor SF3b 155 kDa subunit;Spliceosome-associated protein 155;SF3B1 protein;Putative uncharacterized protein DKFZp434M052	SF3B1;SAP155;DKFZp434M052	O75533;A0JLT9;A0PJH5;Q32Q20;Q7Z497;Q9NTB4	1	0.0440188	0.347605	0.0762428	0.0139104		O75533
Heterochromatin protein 1-binding protein 3;Protein HP1-BP74;cDNA FLJ50949, highly similar to Homo sapiens heterochromatin protein 1, binding protein 3 (HP1BP3), mRNA;cDNA FLJ61197, highly similar to Homo sapiens heterochromatin protein 1, binding protein 3 (HP1BP3), mRNA;Heterochromatin protein 1, binding protein 3, isoform CRA_b;Heterochromatin protein 1, binding protein 3	HP1BP3;hCG_38870;RP5-930J4.3-006;RP5-930J4.3-015	Q5SSJ5-1;Q5SSJ5;B4E210;Q5SSJ5-4;Q5SSJ5-2;Q5SSJ5-3;B4E0N8;Q5SWC8;B0QZK4	1	0.260841	0.0778297	0.169211	0.0139571		Q5SSJ5
Histone H2B type 1-L;H2B.c;H2B/c;Histone H2B type 1-N;H2B.d;H2B/d;Histone H2B;Histone H2B type 1-K;HIRA-interacting protein 1;Histone H2B type 1-H;H2B.j;H2B/j;Histone H2B type 1-C/E/F/G/I;H2B.a/g/h/k/l;H2B.1 A;H2B/g;H2B/h;H2B/k;H2B/l;Histone H2B type 1-D;H2B.b;H2B/b;H2B.1 B;HIRA-interacting protein 2;Histone H2B type F-S;Histone H2B type 1-M;HIST1H2BC protein;Histone H2B type 2-F	HIST1H2BL;H2BFC;HIST1H2BN;H2BFD;hCG_1743059;HIST1H2BK;H2BFT;HIRIP1;hCG_2005139;HIST1H2BH;H2BFJ;hCG_1640983;HIST1H2BC;H2BFL;HIST1H2BE;H2BFH;HIST1H2BF;H2BFG;HIST1H2BG;H2BFA;HIST1H2BI;H2BFK;hCG_1640484;hCG_1640985;hCG_1641780;hCG_1787353;hCG_1787365;HIST1H2BD;H2BFB;HIRIP2;H2BFS;HIST1H2BM;H2BFE;HIST2H2BF	Q99880;Q99877;A8K9J7;B2R5L4;B4DR52;Q3KP43;O60814;A8K7P7;B4DLA9;A0AVI3;Q93079;B2R541;P62807;B2R4S9;P58876;P57053;Q99879;Q0D2M2;Q5QNW6	1	0.168698	0.273578	0.0412548	0.0139608		Q99880
Interleukin enhancer-binding factor 3;Nuclear factor of activated T-cells 90 kDa;Double-stranded RNA-binding protein 76;Translational control protein 80;Nuclear factor associated with dsRNA;M-phase phosphoprotein 4;cDNA FLJ58050, highly similar to Interleukin enhancer-binding factor 3;cDNA FLJ58801, highly similar to Interleukin enhancer-binding factor 3;Interleukin enhancer binding factor 3 isof…	ILF3;DRBF;MPHOSPH4;NF90	Q12906-1;Q12906;Q12906-3;Q12906-2;Q12906-5;B4DDF3;B4DFG4;Q59GP7	1	0.243733	0.217855	0.010559	0.0139866		Q12906
ATP synthase subunit e, mitochondrial	ATP5I;ATP5K	P56385	1	4.73483	0.400991	1.11587	0.0139936		P56385
Probable D-lactate dehydrogenase, mitochondrial	LDHD	Q86WU2-1;Q86WU2;Q86WU2-2	1	3.57084	0.13054	0.636356	0.0140326		Q86WU2
Transforming growth factor beta-1-induced transcript 1 protein;Hydrogen peroxide-inducible clone 5 protein;Androgen receptor-associated protein of 55 kDa;Transforming growth factor beta 1 induced transcript 1, isoform CRA_a;cDNA, FLJ93847, Homo sapiens transforming growth factor beta 1 induced transcript 1 (TGFB1I1), mRNA	TGFB1I1;ARA55;hCG_1772006	O43294-1;O43294;O43294-2;B2R8D5	1	0	0.297362	0	0.0141162		O43294
Tricarboxylate transport protein, mitochondrial;Citrate transport protein;Tricarboxylate carrier protein;Solute carrier family 25 member 1;Mitochondrial citrate transport protein;cDNA FLJ60026, highly similar to Tricarboxylate transport protein, mitochondrial;Solute carrier family 25 (Mitochondrial carrier; citrate transporter), member 1, isoform CRA_b	SLC25A1;SLC20A3;hCG_17246	P53007;Q6LAP8;B4DP62	1	0.417234	0.265294	0.0993603	0.0141275		P53007
Microtubule-associated protein RP/EB family member 1;APC-binding protein EB1;End-binding protein 1;MAPRE1 protein;Microtubule-associated protein, RP/EB family, member 1, isoform CRA_a;cDNA, FLJ92966, Homo sapiens microtubule-associated protein, RP/EB family, member 1(MAPRE1), mRNA;cDNA FLJ52068, highly similar to Microtubule-associated protein RP/EB family member 1	MAPRE1;hCG_37629	Q15691;A2VCR0;B2R6I7;B4DM33	1	0.148309	0.168248	0.140867	0.0141444		Q15691
Intersectin-1;SH3 domain-containing protein 1A;SH3P17;Intersectin 1 (SH3 domain protein);Intersectin 1 long form variant 2;Intersectin 1 long form variant 3;Intersectin 1 short form variant 5;ITSN1 protein;Intersectin 1 short form variant 3;Intersectin 1 short form variant 7;Intersectin 1 short form variant 4;Intersectin 1 long form variant 4;Intersectin 1 short form variant 11;Intersectin 1 shor…	ITSN1;ITSN;SH3D1A;DKFZp686J17173	Q15811-1;Q15811;Q14BD3;A8CTX8;A8CTY3;Q0PW94;Q14BD4;Q15811-4;A8D7D0;Q0PW96;Q15811-2;A7XZY7;A7Y322;A8CTZ0;A8DCP3;B4DTM2;Q0PW95;Q2LAE2;Q6GMY7;Q6PD56;Q7Z328;Q7Z453;Q86VI9;Q9UET4;Q15811-3;A8CTY7;Q0PW97;Q20BK3;Q6J333	1	0	0.297872	0	0.0141626		Q15811
26S protease regulatory subunit 6B;Proteasome 26S subunit ATPase 4;MB67-interacting protein;MIP224;TAT-binding protein 7;cDNA FLJ78505, highly similar to Homo sapiens proteasome (prosome, macropain) 26S subunit, ATPase, 4 (PSMC4), transcript variant 1, mRNA;Proteasome (Prosome, macropain) 26S subunit, ATPase, 4, isoform CRA_b;cDNA, FLJ93682, Homo sapiens proteasome (prosome, macropain) 26S subuni…	PSMC4;MIP224;TBP7;hCG_43346	P43686-1;P43686;A8K2M0;P43686-2	1	0.220671	0.532147	0.382213	0.0141708		P43686
Inorganic pyrophosphatase 2, mitochondrial;Pyrophosphatase SID6-306;cDNA FLJ60819, highly similar to Inorganic pyrophosphatase 2, mitochondrial (EC 3.6.1.1);Putative uncharacterized protein PPA2;cDNA FLJ76209, highly similar to Homo sapiens inorganic pyrophosphatase 2 (PPA2), transcript variant 2, mRNA;cDNA FLJ59863, highly similar to Inorganic pyrophosphatase 2, mitochondrial (EC 3.6.1.1)	PPA2;HSPC124	Q9H2U2-2;Q9H2U2;Q9H2U2-1;B4DR66;Q4W5E9;Q9H2U2-3;A8K0P2;B4DFH3;A6NKL9	1	2.49921	0.272344	0.570199	0.0143031		Q9H2U2
cDNA FLJ78564, highly similar to Homo sapiens aldehyde dehydrogenase 5 family, member A1 (succinate-semialdehyde dehydrogenase) (ALDH5A1), nuclear gene encoding mitochondrial protein, transcript variant 2, mRNA;Succinate-semialdehyde dehydrogenase, mitochondrial;NAD(+)-dependent succinic semialdehyde dehydrogenase;Aldehyde dehydrogenase family 5 member A1;Succinic semialdehyde dehydrogenase;cDNA …	ALDH5A1;SSADH;hCG_37509	A8K435;B2RD26;Q8N3W6;P51649;B4DGP6;Q546H9;Q8N3W7	1	3.86808	0.0143424	0.871469	0.0143032		A8K435
Capz-interacting protein;Protein kinase substrate CapZIP;RCSD domain-containing protein 1;RCSD domain containing 1	RCSD1;CAPZIP;RP3-503M14.1-001;RP3-503M14.1-005	Q6JBY9-1;Q6JBY9;B1AK48;Q6JBY9-2;Q5TGW6	1	0	0.299684	0	0.0143282		Q6JBY9
Proteasome subunit beta type-1;Proteasome component C5;Macropain subunit C5;Multicatalytic endopeptidase complex subunit C5;Proteasome gamma chain;Proteasome subunit beta type	PSMB1;PSC5	P20618;B5BU76;Q53FT8	1	0.530643	0.04895	0.117158	0.0144345		P20618
Ubiquitin carboxyl-terminal hydrolase 15;Ubiquitin thioesterase 15;Ubiquitin-specific-processing protease 15;Deubiquitinating enzyme 15;Unph-2;Unph4;Ubiquitin carboxyl-terminal hydrolase;USP15 protein	USP15;KIAA0529	Q9Y4E8-1;Q9Y4E8;Q08AL5;Q9Y4E8-3;Q9Y4E8-2;Q2NL66	1	0	0.301756	0	0.0145183		Q9Y4E8
60S acidic ribosomal protein P2;Renal carcinoma antigen NY-REN-44;RPLP2 protein;Ribosomal protein, large, P2, isoform CRA_a;cDNA, FLJ92222, Homo sapiens ribosomal protein, large P2 (RPLP2), mRNA	RPLP2;D11S2243E;RPP2;hCG_1778304	P05387;Q6FG96	1	0.267531	0.11724	0.107043	0.014538		P05387
Putative uncharacterized protein DKFZp686P03159;Annexin A2;Annexin-2;Annexin II;Lipocortin II;Calpactin I heavy chain;Chromobindin-8;p36;Protein I;Placental anticoagulant protein IV;Putative annexin A2-like protein;Annexin A2 pseudogene 2;Lipocortin II pseudogene;cDNA FLJ34687 fis, clone MESAN2000620, highly similar to Annexin A2;cDNA FLJ59138, highly similar to Annexin A2	DKFZp686P03159;ANXA2;ANX2;ANX2L4;CAL1H;LPC2D;ANXA2P2;ANX2L2;ANX2P2;LPC2B	Q6N0B3;Q8TBV2;P07355;A6NMY6;B3KRQ1;B4DNH8	1	0.469244	0.126781	0.033975	0.0145746		Q6N0B3
Neuroblast differentiation-associated protein AHNAK;Desmoyokin;cDNA FLJ57801, highly similar to Homo sapiens AHNAK nucleoprotein (desmoyokin) (AHNAK), transcript variant 1, mRNA;AHNAK-related protein;cDNA FLJ46846 fis, clone UTERU3004635, moderately similar to Neuroblast differentiation associated protein AHNAK;cDNA FLJ33834 fis, clone CTONG2004264, moderately similar to NEUROBLAST DIFFERENTIATIO…	AHNAK;PM227	Q09666;B4DTV0;Q13727;Q6ZQN2;Q8N274;B5MEH8	1	0.386376	0.153086	0.101858	0.0146002		Q09666
U4/U6 small nuclear ribonucleoprotein Prp31;Pre-mRNA-processing factor 31;U4/U6 snRNP 61 kDa protein;Serologically defined breast cancer antigen NY-BR-99;cDNA FLJ59251, highly similar to U4/U6 small nuclear ribonucleoprotein Prp31;Truncated pre-mRNA splicing factor protein	PRPF31;PRP31	Q8WWY3-1;Q8WWY3;Q8WWY3-3;B4DWW8;Q8WWY3-2;Q2EKB9	1	0	0.303012	0	0.0146342		Q8WWY3
Heterogeneous nuclear ribonucleoprotein F;Nucleolin-like protein mcs94-1;Heterogeneous nuclear ribonucleoprotein F, N-terminally processed;cDNA FLJ10502 fis, clone NT2RP2000414, highly similar to Heterogeneous nuclear ribonucleoprotein F;Heterogeneous nuclear ribonucleoprotein F, isoform CRA_a;cDNA FLJ57121, highly similar to Heterogeneous nuclear ribonucleoprotein F	HNRNPF;HNRPF;hCG_1770443;OK/SW-cl.23	P52597;B3KM84;B4DKS8;Q8NI96	1	0.0612304	0.336692	0.0552508	0.0146692		P52597
Putative mitochondrial import inner membrane translocase subunit Tim23B;Mitochondrial import inner membrane translocase subunit Tim23;cDNA FLJ56773, highly similar to Mitochondrial import inner membrane translocase subunit Tim23;cDNA, FLJ79448, highly similar to Mitochondrial import inner membrane translocase subunit Tim23;Translocase of inner mitochondrial membrane 23 homolog (Yeast);cDNA FLJ574…	TIMM23B;TIMM23;TIM23;RP11-481A12.7-002	Q5SRD1;O14925;B4DI18;B1APJ0;B4DDK6	1	0	0.303447	0	0.0146744		Q5SRD1
Protein NipSnap homolog 1;cDNA FLJ78131, highly similar to Homo sapiens nipsnap homolog 1 (C. elegans) (NIPSNAP1), mRNA;HCG2011153, isoform CRA_e;cDNA, FLJ95187, highly similar to Homo sapiens nipsnap homolog 1 (C. elegans) (NIPSNAP1), mRNA;cDNA FLJ58042, highly similar to Protein NipSnap1	NIPSNAP1;hCG_2011153	Q9BPW8;A8K4I8;B2RAY3;B4DQI7	1	0.181276	0.259589	0.31398	0.0147997		Q9BPW8
Serrate RNA effector molecule homolog;Arsenite-resistance protein 2;SRRT protein;Arsenate resistance protein ARS2;cDNA FLJ60599, highly similar to Arsenite-resistance protein 2;cDNA FLJ60199, highly similar to Arsenite-resistance protein 2;Arsenite-resistant protein ASR2	SRRT;ARS2;ASR2;tcag7.1107	Q9BXP5-1;Q9BXP5;Q6NT74;Q9BXP5-3;A4D2E6;B4DJL4;B4DZA6;Q8TDQ5;Q9BXP5-2;Q9BXP5-4	1	0	0.304969	0	0.0148155		Q9BXP5
Lysophospholipase-like protein 1;cDNA FLJ77315, highly similar to Homo sapiens lysophospholipase-like 1 (LYPLAL1), mRNA;cDNA FLJ41634 fis, clone FCBBF4000076, highly similar to Lysophospholipase-like protein 1 (EC 3.1.2.-);Lysophospholipase-like 1, isoform CRA_a	LYPLAL1;hCG_24907	Q5VWZ2-1;Q5VWZ2;A8K677;B3KVW3;Q5VWZ2-2	1	1.80693	0.297602	0.0684145	0.0148354		Q5VWZ2
Polyadenylate-binding protein 1;cDNA FLJ57246, highly similar to Poly(A)-binding protein 1;cDNA FLJ59219, highly similar to Poly(A)-binding protein 1;Polyadenylate-binding protein 3;Testis-specific poly(A)-binding protein;PABP3;Poly(A) binding protein, cytoplasmic 3;cDNA, FLJ93858, highly similar to Homo sapiens poly(A) binding protein, cytoplasmic 3 (PABPC3), mRNA	PABPC1;PAB1;PABP1;PABPC2;PABPC3;PABP3;PABPL3;RP11-165I9.5-001;hCG_1774619	P11940-1;P11940;B4DZW4;P11940-2;B4DQX0;Q9H361;Q2VIP3;Q3ZCS4;Q5VX58	1	0.178142	0.0664372	0.238887	0.0149293		P11940
60S ribosomal protein L37a;RPL37A protein;cDNA FLJ76565, highly similar to Homo sapiens ribosomal protein L37a, mRNA	RPL37A	P61513;Q6P4E4	1	0.103725	0.220477	0.179657	0.0149495		P61513
Calcium-binding mitochondrial carrier protein Aralar1;Mitochondrial aspartate glutamate carrier 1;Solute carrier family 25 member 12;cDNA FLJ12766 fis, clone NT2RP2001520, highly similar to Calcium-binding mitochondrial carrier protein Aralar1;Putative uncharacterized protein SLC25A12;cDNA FLJ33752 fis, clone BRCAN2000364, highly similar to Calcium-binding mitochondrial carrier protein Aralar1	SLC25A12;ARALAR1	O75746;B3KMV8;A8MUJ5;B3KR64	1	2.20955	0.166745	0.529481	0.0149797		O75746
Procollagen-lysine,2-oxoglutarate 5-dioxygenase 1;Lysyl hydroxylase 1;cDNA, FLJ92537, highly similar to Homo sapiens procollagen-lysine, 2-oxoglutarate 5-dioxygenase (lysine hydroxylase, Ehlers-Danlos syndrome type VI) (PLOD), mRNA;cDNA FLJ59393, highly similar to Procollagen-lysine,2-oxoglutarate5-dioxygenase 1 (EC 1.14.11.4);cDNA, FLJ79184, highly similar to Procollagen-lysine, 2-oxoglutarate 5…	PLOD1;LLH;PLOD	Q02809;B2R5M9;B4DR87;B4DGN8	1	0	0.308097	0	0.0151073		Q02809
Bifunctional purine biosynthesis protein PURH;Phosphoribosylaminoimidazolecarboxamide formyltransferase;5-aminoimidazole-4-carboxamide ribonucleotide formyltransferase;AICAR transformylase;IMP cyclohydrolase;Inosinicase;IMP synthetase;ATIC;cDNA FLJ75424, highly similar to Human AICAR formyltransferase/IMP cyclohydrolase bifunctional enzyme (purH) mRNA;5-aminoimidazole-4-carboxamide ribonucleotide…	ATIC;PURH;OK/SW-cl.86;hCG_16691	P31939;A8K202;B2R7P8;B4DP06	1	0.432379	0.253941	0.0798802	0.0151317		P31939
28S ribosomal protein S22, mitochondrial;MRP-S22;cDNA FLJ78575;cDNA PSEC0127 fis, clone PLACE1003724, highly similar to Mitochondrial 28S ribosomal protein S22;Brain my045 protein	MRPS22;C3orf5;RPMS22;GK002	P82650;A8K9Y7;Q8NBL6;Q9H3I1	1	0.892666	0.1087	0.140749	0.0152976		P82650
Mitochondrial carrier homolog 1;Presenilin-associated protein;MTCH1 protein;Mitochondrial carrier homolog 1 (C. elegans), isoform CRA_c;Cell proliferation-inducing protein 60;cDNA FLJ12721 fis, clone NT2RP1001310, highly similar to Mitochondrial carrier homolog 1;Mitochondrial carrier homolog 1 (C. elegans), isoform CRA_d;cDNA, FLJ96021, Homo sapiens mitochondrial carrier homolog 1 (C. elegans) (…	MTCH1;PSAP;CGI-64;UNQ1871/PRO4314;hCG_15365;PIG60;RP1-90K10.1-007	Q9NZJ7-1;Q9NZJ7;A8KAX5;Q9NZJ7-2;A4FVA6;A8YXX5;B2RCE3;Q9Y374;Q5TDC2;Q9NZJ7-3	1	0.555067	0.238382	0.121313	0.0153315		Q9NZJ7
U5 small nuclear ribonucleoprotein 200 kDa helicase;U5 snRNP-specific 200 kDa protein;Activating signal cointegrator 1 complex subunit 3-like 1;BRR2 homolog;SNRNP200 protein;cDNA FLJ56901, highly similar to U5 small nuclear ribonucleoprotein 200 kDa helicase (EC 3.6.1.-);cDNA FLJ55548, highly similar to U5 small nuclear ribonucleoprotein 200 kDa helicase (EC 3.6.1.-);cDNA FLJ13778 fis, clone PLAC…	SNRNP200;ASCC3L1;HELIC2;KIAA0788	O75643-1;O75643;A2RRQ7;A4FU77;B4E0P5;B4E150;Q5ZF01;Q7L5W4;Q9H8B9;Q9P172;Q9UNV9	1	0.0758179	0.200304	0.131321	0.0153519		O75643
Hydroxyacid-oxoacid transhydrogenase, mitochondrial;Fe-containing alcohol dehydrogenase;Alcohol dehydrogenase iron-containing protein 1;ADHFe1;cDNA FLJ59475, highly similar to Homo sapiens alcohol dehydrogenase, iron containing, 1 (ADHFE1), mRNA;cDNA FLJ55174, highly similar to Rattus norvegicus alcohol dehydrogenase, iron containing, 1 (Adhfe1), mRNA;Alcohol dehydrogenase, iron containing, 1, is…	ADHFE1;HMFT2263;hCG_1984244	Q8IWW8-1;Q8IWW8;Q8IWW8-2;B4DEA1;Q8IWW8-3;B4DTJ8;Q8IWW8-4	1	3.93273	0.338726	1.14608	0.0153557		Q8IWW8
Hydroxyacyl-coenzyme A dehydrogenase, mitochondrial;Short chain 3-hydroxyacyl-CoA dehydrogenase;Medium and short chain L-3-hydroxyacyl-coenzyme A dehydrogenase;cDNA FLJ38699 fis, clone KIDNE2002168, highly similar to Short chain 3-hydroxyacyl-CoA dehydrogenase, mitochondrial (EC 1.1.1.35);cDNA, FLJ95242, highly similar to Homo sapiens L-3-hydroxyacyl-Coenzyme A dehydrogenase, short chain (HADHSC)…	HADH;HAD;HADHSC;SCHAD	Q16836-2;Q16836;B3KTT6;Q16836-1;B2RB06;Q4W5B4	1	2.68733	0.0269941	0.500681	0.0154217		Q16836
2-oxoglutarate dehydrogenase E1 component, mitochondrial;Alpha-ketoglutarate dehydrogenase;OGDH protein;cDNA FLJ53308, highly similar to 2-oxoglutarate dehydrogenase E1 component, mitochondrial (EC 1.2.4.2);cDNA FLJ53323, highly similar to 2-oxoglutarate dehydrogenase E1 component, mitochondrial (EC 1.2.4.2);cDNA FLJ54570, highly similar to 2-oxoglutarate dehydrogenase E1 component, mitochondrial…	OGDH	Q02218;A2VCT3;B4DF00;B4DH65;B4DZ95;B4E2U9;B4DK55;B4E3E9	1	2.47746	0.103601	0.424911	0.0155449		Q02218
Vimentin;Vimentin variant 3;Vimentin variant 4;cDNA FLJ34494 fis, clone HLUNG2005030, highly similar to VIMENTIN;Vimentin variant	VIM	P08670;B0YJC2;B0YJC4;B0YJC5;B3KRK8;Q53HU8	1	0.163387	0.294624	0.0413777	0.0155505		P08670
Nesprin-1;Nuclear envelope spectrin repeat protein 1;Synaptic nuclear envelope protein 1;Myocyte nuclear envelope protein 1;SYNE1 protein;Spectrin repeat containing, nuclear envelope 1;Spectrin-like protein of the nuclear envelope and Golgi;cDNA FLJ16153 fis, clone BRAMY3000210, highly similar to Nesprin-1;cDNA FLJ55924, highly similar to Nesprin-1;Putative uncharacterized protein DKFZp686K0193	SYNE1;KIAA0796;KIAA1262;KIAA1756;MYNE1;RP1-130E4.2-002;DKFZp686K0193	Q8NF91-4;Q8NF91;A7E2D5;Q5JT51;Q5JT52;Q5JV23;Q7Z6R3;Q8NF91-1;Q8NF91-2;Q7RTM4;Q8NF91-8;B3KV58;B4E3R1;Q5BKU8;Q7Z3K4	1	0.54035	0.133857	0.0474615	0.0156103		Q8NF91
Cytochrome b-c1 complex subunit Rieske, mitochondrial;Ubiquinol-cytochrome c reductase iron-sulfur subunit;Rieske iron-sulfur protein;Complex III subunit 5;Cytochrome b-c1 complex subunit 11;Ubiquinol-cytochrome c reductase 8 kDa protein;Complex III subunit IX;Cytochrome b-c1 complex subunit Rieske-like protein 1	UQCRFS1;UQCRFSL1	P47985;A8K519;P0C7P4	1	1.32677	0.458766	0.473096	0.0156174		P47985
Aldehyde dehydrogenase, mitochondrial;ALDH class 2;ALDHI;ALDH-E2;ALDH2;Mitochondrial aldehyde dehydrogenase 2 variant	ALDH2;ALDM	P05091;B4YAH7;Q53FB6	1	2.68886	0.247164	0.337781	0.0156209		P05091
Melanocortin 1 receptor;cDNA, FLJ95457, highly similar to Homo sapiens tubulin, beta, 4 (TUBB4), mRNA;Tubulin, beta, 4 variant;Melanocortin 1 receptor variant V265I;Melanocortin 1 receptor variant A222T;Melanocortin 1 receptor variant A111V;Melanocortin 1 receptor variant C315R;Melanocortin 1 receptor variant T308M;Melanocortin 1 receptor variant R213W;Melanocortin 1 receptor variant R160Q;Tubuli…	MC1R;hCG_2042771;TUBB3;TUBB4;hCG_1983504	A8I0M1;B2RBD5;Q1JUL6;Q1JUL8;Q1JUL9;Q1JUM0;Q1JUM2;Q1JUM3;Q1JUM4;Q53G92;Q6UR92;Q6UR93;Q6UR94;Q6UR95;Q6UR96;Q6UR97;Q6UR98;Q7KZS6;Q86YW1;Q13509;Q3ZCR3;Q9BV28;A8K854	1	0	0.314044	0	0.0156687		A8I0M1
CD59 glycoprotein;Membrane attack complex inhibition factor;MAC-inhibitory protein;Protectin;MEM43 antigen;Membrane inhibitor of reactive lysis;20 kDa homologous restriction factor;HRF-20;1F5 antigen;CD59 protein;CD59 antigen, complement regulatory protein, isoform CRA_b;cDNA, FLJ92039, Homo sapiens CD59 antigen p18-20 (antigen identified by monoclonalantibodies 16.3A5, EJ16, EJ30, EL32 and G344)…	CD59;MIC11;MIN1;MIN2;MIN3;MSK21;hCG_2033390	P13987;Q6FHM9	1	2.31852	0.190305	0.547834	0.0156793		P13987
Synaptosomal-associated protein 23;Vesicle-membrane fusion protein SNAP-23;Synaptosomal-associated protein	SNAP23;hCG_40424	O00161-1;O00161;A8K287;O00161-2	1	0.074917	0.413608	0.12976	0.0156896		O00161
HNRPR protein;Heterogeneous nuclear ribonucleoprotein R;cDNA, FLJ93632, highly similar to Homo sapiens heterogeneous nuclear ribonucleoprotein R (HNRPR), mRNA;cDNA FLJ53358, highly similar to Heterogeneous nuclear ribonucleoprotein R;cDNA FLJ54544, highly similar to Heterogeneous nuclear ribonucleoprotein R;Heterogeneous nuclear ribonucleoprotein R, isoform CRA_a;Heterogeneous nuclear ribonucleop…	HNRPR;HNRNPR;RP5-1057J7.2-002;hCG_38907;DKFZp686A13234;DKFZp686O0665	Q9BV64;O43390;B2R7W4;B4DMB1;B4DT28;Q2L7G6;Q6MZS5;B4DMD1;Q0VGD6;Q7Z334	1	0.213001	0.161935	0.0900304	0.0157371		Q9BV64
Eukaryotic translation initiation factor 3 subunit A;Eukaryotic translation initiation factor 3 subunit 10;eIF-3-theta;eIF3 p167;eIF3 p180;eIF3 p185;Eukaryotic translation initiation factor 3, subunit 10 theta, 150/170kDa;cDNA FLJ50921, highly similar to Eukaryotic translation initiation factor 3 subunit 10;EIF3A protein;Eukaryotic translation initiation factor 3, subunit A	EIF3A;EIF3S10;KIAA0139;RP11-435O11.3-001;hCG_41143	Q14152;B1AMV5;B4DYS1;Q05BS0;Q24JU4;Q3B770;Q6P1R0;Q7Z5T5	1	0.385385	0.167801	0.0568234	0.0157427		Q14152
Succinyl-CoA ligase [ADP-forming] subunit beta, mitochondrial;ATP-specific succinyl-CoA synthetase subunit beta;Succinyl-CoA synthetase beta-A chain;Renal carcinoma antigen NY-REN-39;Succinate-CoA ligase, ADP-forming, beta subunit, isoform CRA_c;cDNA, FLJ96579, highly similar to Homo sapiens succinate-CoA ligase, ADP-forming, beta subunit (SUCLA2), mRNA;Putative uncharacterized protein DKFZp686D0…	SUCLA2;hCG_30751;DKFZp686D0880	Q9P2R7-1;Q9P2R7;B2RDE7;Q5T9Q4;Q6N0B1;Q9P2R7-2;B4DRV2;Q7Z503	1	2.31752	0.0857988	0.498806	0.015787		Q9P2R7
60S ribosomal protein L10a;CSA-19;Neural precursor cell expressed developmentally down-regulated protein 6;Ribosomal protein L1	RPL10A;NEDD6;hCG_17660	P62906;B2R801;Q1JQ76	1	0.362028	0.260297	0.181576	0.0158094		P62906
Cytoplasmic dynein 1 heavy chain 1;Cytoplasmic dynein heavy chain 1;Dynein heavy chain, cytosolic;cDNA FLJ52684, highly similar to Dynein heavy chain, cytosolic;Dynein heavy chain;Cytoplasmic dynein heavy chain	DYNC1H1;DHC1;DNCH1;DNCL;DNECL;DYHC;KIAA0325;Dnchc1	Q14204;B0I1R0;B4DSR6;Q92862;Q9NRC3	1	0.529743	0.116838	0.0692138	0.0158239		Q14204
Lutheran blood group glycoprotein;B-CAM cell surface glycoprotein;Auberger B antigen;F8/G253 antigen;Lutheran glycoprotein	BCAM;LU;MSK19	P50895;A8MYF9;A9LST5;A9YWT4;A9YWT5;A9YWT6;A9YWT7	1	0.368971	0.187793	0.0362478	0.0158293		P50895
Ig gamma-4 chain C region;Putative uncharacterized protein IGHG4	IGHG4	Q8TC63;P01861;A6NNZ4	1	13.1399	0.510476	4.0682	0.0158469		Q8TC63
Histone H1.5;Histone H1a	HIST1H1B;H1F5	P16401	1	0.0114411	0.311768	0.00529095	0.0158587		P16401
Alanyl-tRNA synthetase, cytoplasmic;Alanine--tRNA ligase;Renal carcinoma antigen NY-REN-42;cDNA FLJ61339, highly similar to Alanyl-tRNA synthetase (EC 6.1.1.7)	AARS	P49588;B4DR45	1	0.150685	0.273482	0.260994	0.0158895		P49588
Peptidase M20 domain-containing protein 2;Aminoacylase 1-like protein 2;cDNA FLJ53568;Aminoacylase 1-like 2	PM20D2;ACY1L2;hCG_33077	Q8IYS1;B4DYJ2	1	0	0.316427	0	0.0158962		Q8IYS1
Proteasome activator complex subunit 1;Proteasome activator 28 subunit alpha;Activator of multicatalytic protease subunit 1;11S regulator complex subunit alpha;Interferon gamma up-regulated I-5111 protein;PSME1 protein;Proteasome (Prosome, macropain) activator subunit 1 (PA28 alpha), isoform CRA_a;cDNA, FLJ92500, Homo sapiens proteasome (prosome, macropain) activator subunit 1 (PA28 alpha) (PSME1…	PSME1;IFI5111;hCG_40175	Q06323;Q6FHU3;Q6IBM2;A6NJG9;Q86SZ9	1	0.58122	0.150515	0.23884	0.0159511		Q06323
Ras-related protein Rab-6A;RAB6A, member RAS oncogene family isoform a variant;RAB6A protein;GTP-binding protein RAB6B;GTP-binding protein RAB6A';Rab6A variant 3	RAB6A;RAB6;RAB6B;RAB6A'	P20340-1;P20340;Q53ET8;Q6FGX3;Q9UL29;P20340-2;Q9UL30;Q1W5D8	1	0.22583	0.271126	0.179615	0.0160309		P20340
DNA mismatch repair protein Msh2;MutS protein homolog 2;cDNA FLJ57316, highly similar to DNA mismatch repair protein Msh2;cDNA FLJ50998, highly similar to DNA mismatch repair protein Msh2;cDNA FLJ51193, highly similar to DNA mismatch repair protein Msh2;Truncated mutS homolog 2 protein;MSH2-Ex10 isoform;MSH2-Ex5 isoform;MutS homolog 2 variant;Putative uncharacterized protein MSH2;Mutant mismatch …	MSH2	P43246;B4DL39;B4DN49;B4E2Z2;A5JTV2;Q0ZAI9;Q0ZAJ1;Q53FK0;Q53GS1;Q53RU4;Q6VBB7;B4DSB9	1	0	0.317861	0	0.0160336		P43246
NAD(P) transhydrogenase, mitochondrial;Nicotinamide nucleotide transhydrogenase;Pyridine nucleotide transhydrogenase;cDNA FLJ61320, highly similar to NAD(P) transhydrogenase, mitochondrial (EC 1.6.1.2);cDNA FLJ57576, highly similar to NAD(P) transhydrogenase, mitochondrial (EC 1.6.1.2);NNT protein	NNT	Q13423;B4DMN9;B4DS88;Q2TB59;Q8N5H5	1	2.49345	0.254388	0.281053	0.0160352		Q13423
Elongation factor 1-alpha 1;eEF1A-1;Elongation factor Tu;Leukocyte receptor cluster member 7;Elongation factor 1-alpha;Eukaryotic translation elongation factor 1 alpha;cDNA FLJ54032, highly similar to Elongation factor 1-alpha 1;Putative elongation factor 1-alpha-like 3;eEF1A-like 3;Eukaryotic translation elongation factor 1 alpha 1;EEF1A1 protein;Putative uncharacterized protein	EEF1A1;EEF1A;EF1A;LENG7;PTI-1;EEF1A1L14;RP11-505P4.2-001;hCG_2033271;EEF1AL3;RP11-505P4.2-003	P68104;A8K9C4;A9X7H1;B4DV42;B4E2C5;Q16577;Q53G85;Q53G89;Q53GA1;Q53GE9;Q53HM9;Q53HQ7;Q53HR1;Q53HR5;Q6IPN6;Q6IPS9;Q6IPT9;Q8IUB0;Q96RE1;Q9H2I7;Q9NZS6;Q5VTE0;A6PW80;B4DNE0;Q2F837;Q504Z0;Q6IQ15;Q6P082;Q6P4C9;Q8TBL1;Q96C29;Q96CD8;Q96EB3	1	0.24318	0.208466	0.0355672	0.0160353		P68104
Heme-binding protein 1;p22HBP;cDNA FLJ75999, highly similar to Homo sapiens heme binding protein 1 (HEBP1), mRNA;Heme binding protein 1, isoform CRA_a	HEBP1;HBP;hCG_27694	Q9NRV9;A8K1G2	1	0.725992	0.247361	0.316322	0.0161556		Q9NRV9
Lamin-B2	LMNB2;LMN2	Q03252	1	0.404229	0.0814849	0.1087	0.0161646		Q03252
Laminin subunit alpha-2;Laminin M chain;Merosin heavy chain;Laminin alpha 2 subunit variant;Putative uncharacterized protein LAMA2	LAMA2;LAMM	P24043;Q59H37;A6NF00;A6NGS5	1	1.28621	0.0862521	0.0261984	0.016181		P24043
Elongation factor 1-gamma;eEF-1B gamma;cDNA FLJ56389, highly similar to Elongation factor 1-gamma;Eukaryotic translation elongation factor 1 gamma;GIG35;EEF1G protein;Eukaryotic translation elongation factor 1 gamma, isoform CRA_c;cDNA FLJ59433, highly similar to Elongation factor 1-gamma	EEF1G;EF1G;PRO1608;hCG_2039458	P26641;B4DTG2;Q2F838;Q2F840;Q53YD7;B4DUP0	1	0.497617	0.248733	0.123244	0.0162271		P26641
Protein NipSnap homolog 3A;NipSnap4;Target for Salmonella secreted protein C;cDNA FLJ58863, highly similar to Protein NipSnap3A	NIPSNAP3A;NIPSNAP4;HSPC299	Q9UFN0;B4DW81	1	0.256031	0.147749	0.0925685	0.0162334		Q9UFN0
cDNA FLJ53425, highly similar to Far upstream element-binding protein 1;Far upstream element-binding protein 1;DNA helicase V;HDH V;cDNA FLJ59240, highly similar to Far upstream element-binding protein 1;cDNA FLJ61021, highly similar to Far upstream element-binding protein 1;Far upstream element-binding protein variant;FUBP1 protein;Putative uncharacterized protein FUBP1	FUBP1	B4DT31;Q96AE4-1;Q96AE4;B4DWL1;B4E0X8;Q59FU3;Q6PJY1;A6NL74	1	0	0.32034	0	0.0162726		B4DT31
Polyadenylate-binding protein 2;Poly(A)-binding protein II;Polyadenylate-binding nuclear protein 1;Nuclear poly(A)-binding protein 1;cDNA FLJ57714, highly similar to Poly(A)-binding protein 2	PABPN1;PAB2;PABP2	Q86U42-1;Q86U42;Q86U42-2;B4DEH8	1	0	0.320807	0	0.0163178		Q86U42
Electron transfer flavoprotein-ubiquinone oxidoreductase, mitochondrial;Electron-transferring-flavoprotein dehydrogenase;Mutant electron-transferring flavoprotein dehydrogenase;cDNA FLJ59482, highly similar to Electron transfer flavoprotein-ubiquinone oxidoreductase, mitochondrial (EC 1.5.5.1);cDNA FLJ52419, highly similar to Electron transfer flavoprotein-ubiquinone oxidoreductase, mitochondrial…	ETFDH;hCG_1811923	Q16134-1;Q16134;A7UNU5;B4DEQ0;B4E3R9;Q547S8;Q16134-2	1	2.67753	0.345109	0.662062	0.0163725		Q16134
Uncharacterized protein KIAA0774;KIAA0774;cDNA FLJ51575, moderately similar to Mus musculus mitochondrial tumor suppressor 1 (Mtus1), transcript variant 2, mRNA;cDNA FLJ51574, weakly similar to Mus musculus mitochondrial tumor suppressor 1 (Mtus1), transcript variant 2, mRNA	KIAA0774	Q5JR59-2;Q5JR59;Q5JR59-1;A7E292;Q5JR59-3;B4DWQ4;B4DYN0;Q5JR59-4;B4DF81	1	0	0.322323	0	0.0164648		Q5JR59
Nuclear pore membrane glycoprotein 210	NUP210;KIAA0906;PSEC0245	Q8TEM1-1;Q8TEM1	1	0	0.32236	0	0.0164685		Q8TEM1
NADH dehydrogenase [ubiquinone] 1 beta subcomplex subunit 5, mitochondrial;NADH-ubiquinone oxidoreductase SGDH subunit;Complex I-SGDH;cDNA, FLJ94443, highly similar to Homo sapiens NADH dehydrogenase (ubiquinone) 1 beta subcomplex, 5, 16kDa (NDUFB5), mRNA;NDUFB5 protein;NADH dehydrogenase (Ubiquinone) 1 beta subcomplex, 5, 16kDa, isoform CRA_h	NDUFB5;hCG_1787208	O43674;B2R9L0;Q05D62;Q561V6	1	2.16798	0.18183	0.383566	0.0165462		O43674
Neuropilin-1;Vascular endothelial cell growth factor 165 receptor;cDNA FLJ77207;Neuropilin 1;Neuropilin 1, isoform CRA_c;Neuropilin-1 variant;Putative uncharacterized protein DKFZp781F1414;Putative uncharacterized protein DKFZp451L152;Neuropilin-1 soluble isoform 11;Neuropilin 1, isoform CRA_d;Muscle type neuropilin 1;Putative uncharacterized protein DKFZp686A03134;Neuropilin 1, isoform CRA_a;Put…	NRP1;NRP;VEGF165R;hCG_19074;DKFZp781F1414;DKFZp451L152;RP11-342D11.1-002;RP11-342D11.1-005;RP11-342D11.1-003;RP11-342D11.1-004;DKFZp686A03134;DKFZp686M1967;RP11-342D11.1-006	O14786-1;O14786;A8K9V7;B0LPG9;Q59F20;Q68DN3;Q6X907;Q86T59;Q5JWQ6;Q9H2D7;Q5T7F0;Q9H2E1;O14786-2;Q5T7F2;Q71SW6;Q5T7F1;Q6AWA9;Q7Z5M2;Q96I90;Q9H2E0;Q5JWQ4	1	0.228853	0.425018	0.20058	0.0165986		O14786
Ubiquitin-like modifier-activating enzyme 6;Ubiquitin-activating enzyme E1-like protein 2;Monocyte protein 4;cDNA FLJ36845 fis, clone ASTRO2013050, weakly similar to UBIQUITIN-ACTIVATING ENZYME E1	UBA6;MOP4;UBE1L2	A0AVT1-1;A0AVT1;B2RAV3;B3KSS1;A0AVT1-2	1	0.07681	0.165975	0.133039	0.0166073		A0AVT1
Methionine-R-sulfoxide reductase B3, mitochondrial;Putative uncharacterized protein DKFZp686C1178	MSRB3;UNQ1965/PRO4487;DKFZp686C1178	Q8IXL7-1;Q8IXL7;Q6MZU8;Q8IXL7-2;B4DR19	1	0	0.324567	0	0.0166835		Q8IXL7
Hemoglobin subunit zeta;Hemoglobin zeta chain;Zeta-globin;HBAZ;Hemoglobin zeta subunit;HBZ protein;Hemoglobin, zeta;Putative uncharacterized protein ENSP00000346992	HBZ;HBZ2;hCG_1787287	P02008;Q1W6G9;Q6IBF6;A6NC93	1	0	0.32491	0	0.016717		P02008
Probable ATP-dependent RNA helicase DDX6;DEAD box protein 6;ATP-dependent RNA helicase p54;Oncogene RCK;cDNA, FLJ93750, Homo sapiens DEAD (Asp-Glu-Ala-Asp) box polypeptide 6 (DDX6), mRNA;DDX6 protein	DDX6;HLR2;RCK	P26196;B2R858;Q8IV96	1	0.301096	0.203013	0.131156	0.0167199		P26196
DNA-directed RNA polymerase II subunit RPB1;DNA-directed RNA polymerase II subunit A;DNA-directed RNA polymerase III largest subunit;RNA-directed RNA polymerase II subunit RPB1;DNA-directed RNA polymerase;cDNA FLJ53860, highly similar to DNA-directed RNA polymerase II largest subunit (EC 2.7.7.6)	POLR2A	P24928;A6NN93;B4DET1;B4E3V7;Q6NX41	1	0	0.325528	0	0.0167776		P24928
FK506-binding protein 10;Peptidyl-prolyl cis-trans isomerase;Immunophilin FKBP65;65 kDa FK506-binding protein;FKBP65;Putative uncharacterized protein DKFZp666D193;cDNA FLJ23972 fis, clone HEP18230, highly similar to 65 kDa FK506-binding protein (EC 5.2.1.8);cDNA FLJ35389 fis, clone SKNMC2000635, moderately similar to 65 kDa FK506-BINDING PROTEIN (EC 5.2.1.8);cDNA FLJ53423, highly similar to FK506…	FKBP10;FKBP65;PSEC0056;DKFZp666D193	Q96AY3;Q658U4;Q6ZME7;Q8NAG5;B4DJJ5;Q9H6J3	1	0	0.326172	0	0.0168406		Q96AY3
rRNA 2'-O-methyltransferase fibrillarin;34 kDa nucleolar scleroderma antigen;cDNA FLJ56738, highly similar to Fibrillarin;Fibrillarin;FBL protein;Putative uncharacterized protein	FBL;FIB1;FLRN;hCG_43349	P22087;B4DLD4;B5BUE8;Q96BS4	1	0	0.326177	0	0.0168412		P22087
Casein kinase 2 beta polypeptide;Casein kinase 2, beta polypeptide;Casein kinase 2, beta polypeptide, isoform CRA_d;Casein kinase II subunit beta;Phosvitin;G5a;Casein kinase 2, beta polypeptide, isoform CRA_b;cDNA, FLJ92126, Homo sapiens casein kinase 2, beta polypeptide (CSNK2B), mRNA;cDNA FLJ50688, highly similar to Casein kinase II subunit beta;Casein kinase 2, beta polypeptide, isoform CRA_c	CSNK2B;DADB-127H9.2-004;DAMA-236L13.2-004;DAMC-157M7.2-004;DAQB-195H10.8-004;DASS-336N12.7-004;XXbac-BCX88C14.4-004;hCG_43725;DADB-127H9.2-002;DAMA-236L13.2-002;DAMC-157M7.2-002;DAQB-195H10.8-002;DASS-336N12.7-002;XXbac-BCX88C14.4-002;XXbac-BPG32J3.6-002;CK2N;G5A;DADB-127H9.2-001;DAMA-236L13.2-001;DAMC-157M7.2-001;DASS-336N12.7-001	Q5SRQ6;Q5SRQ3;P67870;B0UXA9;B4DUJ4	1	0.0938941	0.134692	0.162629	0.0169342		Q5SRQ6
26S proteasome non-ATPase regulatory subunit 14;26S proteasome regulatory subunit rpn11;26S proteasome-associated PAD1 homolog 1;cDNA FLJ30566 fis, clone BRAWH2005068, highly similar to 26S proteasome non-ATPase regulatory subunit 14;Proteasome (Prosome, macropain) 26S subunit, non-ATPase, 14;Putative uncharacterized protein PSMD14;26S proteasome-associated pad1 homolog variant;PSMD14 protein	PSMD14;POH1;hCG_40412	O00487;B3KNW2;Q53TH1;Q59G89;Q96DE8	1	0.285681	0.282373	0.494814	0.0170186		O00487
cDNA FLJ40132 fis, clone TESTI2012155, highly similar to NUCLEOPORIN-LIKE PROTEIN RIP;Arf-GAP domain and FG repeats-containing protein 1;Nucleoporin-like protein RIP;HIV-1 Rev-binding protein;Rev-interacting protein;Rev/Rex activation domain-binding protein;cDNA FLJ57927, highly similar to Nucleoporin-like protein RIP	AGFG1;HRB;RAB;RIP	B3KUL1;P52594-1;P52594;P52594-3;P52594-2;B4DHC5	1	0	0.328907	0	0.0171099		B3KUL1
FSCN1 protein;Fascin;Singed-like protein;55 kDa actin-bundling protein;p55;cDNA FLJ37935 fis, clone CTONG2005290, highly similar to FASCIN	FSCN1;FAN1;HSN;SNL	Q96IH1;Q16658;B3KTA3	1	0.149027	0.333791	0.0542174	0.0171223		Q96IH1
CD166 antigen;Activated leukocyte cell adhesion molecule;cDNA FLJ30070 fis, clone ASTRO2000046, highly similar to CD166 ANTIGEN;cDNA FLJ59249, highly similar to CD166 antigen;cDNA, FLJ79012, highly similar to CD166 antigen;cDNA FLJ52980, highly similar to CD166 antigen	ALCAM;MEMD	Q13740-1;Q13740;B2RNS3;B3KNN9;Q13740-2;B4DTU0;B4DX43	1	0	0.330363	0	0.0172539		Q13740
Proteasome subunit alpha type-6;Proteasome iota chain;Macropain iota chain;Multicatalytic endopeptidase complex iota chain;27 kDa prosomal protein;PROS-27;p27K;Proteasome subunit alpha type;cDNA FLJ52022, highly similar to Proteasome subunit alpha type 6 (EC 3.4.25.1);cDNA, FLJ79122, highly similar to Proteasome subunit alpha type 6 (EC 3.4.25.1);cDNA FLJ51729, highly similar to Proteasome subuni…	PSMA6;PROS27;hCG_21177	P60900;B2R7J9;B4DQR4;B4DXJ9;Q9BZ93	1	0.612216	0.0401073	0.0886084	0.0172624		P60900
Myosin light chain 3;Myosin light chain 1, slow-twitch muscle B/ventricular isoform;Ventricular/slow twitch myosin alkali light chain;Cardiac myosin light chain-1;Myosin, light polypeptide 3, alkali; ventricular, skeletal, slow, isoform CRA_a;cDNA, FLJ92321, Homo sapiens myosin, light polypeptide 3, alkali; ventricular,skeletal, slow (MYL3), mRNA;Myosin 1 light chain	MYL3;hCG_15424	P08590;B2R534;Q14909	1	2.37855	0.243182	0.437423	0.0172862		P08590
Protein HRPAP20;Hormone-regulated proliferation-associated protein of 20 kDa;Chromosome 6 open reading frame 66;cDNA, FLJ92115	HRPAP20;C6orf66;HSPC125;My013;hCG_16704	Q9P032;B2R4J5	1	0.519221	0.0203137	0.166387	0.0172994		Q9P032
Leucine-rich repeat-containing protein 59;cDNA, FLJ95955	LRRC59;PRO1855	Q96AG4;B2RE83	1	0.140694	0.367705	0.0983324	0.0173957		Q96AG4
Fibronectin;Cold-insoluble globulin;Ugl-Y1;Ugl-Y2;Ugl-Y3;Fibronectin splice variant B;cDNA FLJ53365, highly similar to Homo sapiens fibronectin 1 (FN1), transcript variant 4, mRNA;cDNA, FLJ79249, highly similar to Homo sapiens fibronectin 1 (FN1), transcript variant 4, mRNA;FN1 protein;Fibronectin splice variant E;Fibronectin splice variant A;Putative uncharacterized protein DKFZp686O13149;Putati…	FN1;FN;DKFZp686O13149;DKFZp686O22169;DKFZp686O12165;DKFZp686L11144;DKFZp686I1370	P02751-9;P02751;A6YID3;B4DN21;Q14328;Q9UQS6;P02751-1;A6YID6;P02751-3;A6YID2;O95617;Q68CX6;Q6MZS0;P02751-5;A6YID5;P02751-15;P02751-7;Q6MZM7;P02751-8;B4DTH2;B4DTK1;P02751-14;A6YID4;Q59G22;Q6N084;P02751-10;B4DU16;Q14327;Q53S27;Q6PJE5;Q7L553;Q9H382;P02751-13;P02751-6;P02751-11;P02751-4;Q5CZ99;P02751-12	1	0.276678	0.391962	0.175935	0.0175211		P02751
PC4 and SFRS1-interacting protein;Lens epithelium-derived growth factor;Transcriptional coactivator p75/p52;Dense fine speckles 70 kDa protein;CLL-associated antigen KW-7;PSIP1 protein;PC4 and SFRS1 interacting protein 1, isoform CRA_a	PSIP1;DFS70;LEDGF;PSIP2;hCG_27254	O75475-1;O75475;O75475-2;Q05CM9;Q8N4N4	1	0	0.333157	0	0.0175318		O75475
Septin-7;CDC10 protein homolog;cDNA FLJ75185;Predicted protein product of Nbla02942;CDC10 protein variant;Putative uncharacterized protein DKFZp686F17268;cDNA FLJ54551, highly similar to Septin-7;SEPT7 protein;Septin 7;cDNA FLJ52574, highly similar to Septin-7;cDNA FLJ53636, highly similar to Septin-7;Putative uncharacterized protein DKFZp586I031	SEPT7;CDC10;Nbla02942;DKFZp686F17268;DKFZp586I031	Q16181-1;Q16181;A8K3D0;Q3LIE9;Q59EY4;Q16181-2;A4GYY8;B4DUD6;Q3B7A3;Q8TC62;B4DNE4;B4DPQ6;Q5JXL7	1	0.205209	0.219818	0.0580206	0.0176432		Q16181
Dolichyl-diphosphooligosaccharide--protein glycosyltransferase subunit 1;Dolichyl-diphosphooligosaccharide--protein glycosyltransferase 67 kDa subunit;Ribophorin-1;Ribophorin I;Ribophorin I, isoform CRA_a;cDNA, FLJ92691, Homo sapiens ribophorin I (RPN1), mRNA;cDNA FLJ51740, highly similar to Dolichyl-diphosphooligosaccharide--proteinglycosyltransferase 67 kDa subunit (EC 2.4.1.119);cDNA FLJ51908,…	RPN1;hCG_40106	P04843;B2R5Z0;B4DL99;B4DNJ5;Q53EP4;Q6IBR0;Q96HX3	1	0.393078	0.196987	0.0366435	0.0176703		P04843
T-complex protein 1 subunit alpha;CCT-alpha	CCT1;CCTA;TCP1	P17987	1	0.254116	0.247781	0.0122355	0.0176842		P17987
NADH dehydrogenase [ubiquinone] 1 beta subcomplex subunit 11, mitochondrial;NADH-ubiquinone oxidoreductase ESSS subunit;Complex I-ESSS;Neuronal protein 17.3;Neuronal protein	NDUFB11;UNQ111/PRO1064	Q9NX14-2;Q9NX14;Q9NX14-1;Q7Z4X2	1	2.20895	0.069072	0.473704	0.0176897		Q9NX14
Myotrophin;Protein V-1;Myotrophin, isoform CRA_a;V-1 protein;cDNA FLJ31663 fis, clone NT2RI2004504, highly similar to MYOTROPHIN;Putative uncharacterized protein DKFZp761E1322	MTPN;DKFZp761E1322;hCG_16971;tcag7.994	P58546;Q69YG1	1	0	0.334792	0	0.0176952		P58546
Protein disulfide-isomerase A5;Protein disulfide isomerase-related protein;PDIA5 protein;Protein disulfide isomerase family A, member 5, isoform CRA_b	PDIA5;PDIR;hCG_17210	Q14554;Q9BV43	1	0	0.335049	0	0.017721		Q14554
Septin-11;Putative uncharacterized protein FLJ10849;cDNA FLJ14373 fis, clone HEMBA1001595, highly similar to SEPTIN 2 HOMOLOG;Putative uncharacterized protein DKFZp566C224	SEPT11;FLJ10849;DKFZp566C224	Q9NVA2;Q4W5G1;Q96KC0;Q9UFY9	1	0.202938	0.220882	0.0592433	0.0177293		Q9NVA2
Histone H4	HIST1H4A;H4/A;H4FA;HIST1H4B;H4/I;H4FI;HIST1H4C;H4/G;H4FG;HIST1H4D;H4/B;H4FB;HIST1H4E;H4/J;H4FJ;HIST1H4F;H4/C;H4FC;HIST1H4H;H4/H;H4FH;HIST1H4I;H4/M;H4FM;HIST1H4J;H4/E;H4FE;HIST1H4K;H4/D;H4FD;HIST1H4L;H4/K;H4FK;HIST2H4A;H4/N;H4F2;H4FN;HIST2H4;HIST2H4B;H4/O;H4FO;HIST4H4	P62805;B2R4R0;Q0VAS5;Q6B823	1	0.239808	0.28128	0.0497513	0.0177614		P62805
14-3-3 protein zeta/delta;Protein kinase C inhibitor protein 1;Tyrosine 3-monooxygenase/tryptophan 5-monooxygenase activation protein, zeta polypeptide, isoform CRA_a;cDNA FLJ76227, highly similar to Homo sapiens tyrosine 3-monooxygenase/tryptophan 5-monooxygenase activation protein, zeta polypeptide (YWHAZ), transcript variant 1, mRNA;cDNA, FLJ79516, highly similar to 14-3-3 protein zeta/delta;T…	YWHAZ;hCG_2009146	P63104;A8K1N0;B0AZS6;Q2F831	1	0.142847	0.309078	0.0285887	0.0178624		P63104
Laminin subunit gamma-1;Laminin B2 chain;LAMC1 protein	LAMC1;LAMB2	P11047;Q5VYE7;Q6NVY8	1	0.736234	0.0527675	0.039339	0.017895		P11047
cDNA FLJ76863, highly similar to Homo sapiens stress-induced-phosphoprotein 1 (Hsp70/Hsp90-organizing protein) (STIP1), mRNA;Stress-induced-phosphoprotein 1;Hsc70/Hsp90-organizing protein;Transformation-sensitive protein IEF SSP 3521;NY-REN-11 antigen;STIP1 protein;cDNA FLJ54451, highly similar to Stress-induced-phosphoprotein 1	STIP1	A8K690;P31948;Q3ZCU9;B4DM70	1	0.295104	0.270377	0.0392657	0.0179574		A8K690
V2-17 protein	IGLV3-25;V2-17	Q5NV90;Q8TBC9	1	5.81384	0.0165303	1.64209	0.017987		Q5NV90
Superoxide dismutase;Superoxide dismutase [Mn], mitochondrial;Superoxide dismutase 2, mitochondrial;Manganese superoxide dismutase;MnSOD;SOD2 protein;Putative uncharacterized protein DKFZp564M2422	SOD2;hCG_34035;RP1-56L9.2-003;DKFZp564M2422	B2R7R1;Q4ZJI1;Q7Z7M4;Q7Z7M5;Q7Z7M6;Q7Z7M7;P04179;B3KUK2;B4DL20;Q5TCM0;Q6LE88;Q6LEN1;Q96AM7;Q9UG59;B4E3K9	1	2.32624	0.303084	0.145983	0.0180023		B2R7R1
BAT2 domain-containing protein 1;HBxAg transactivated protein 2;cDNA FLJ52084, highly similar to Homo sapiens BAT2 domain containing 1 (BAT2D1), mRNA;cDNA FLJ54637, highly similar to Homo sapiens BAT2 domain containing 1 (BAT2D1), mRNA	BAT2D1;KIAA1096;XTP2	Q9Y520-7;Q9Y520;Q9Y520-1;Q9Y520-5;B4E3S2;Q9Y520-4;Q9Y520-6;Q9Y520-3;B4DM27;Q9Y520-2	1	0	0.338141	0	0.018032		Q9Y520
Myosin-Ic;Myosin I beta;MMI-beta;MYO1C protein	MYO1C	O00159;A1L180	1	0.582896	0.159319	0.040628	0.018066		O00159
Solute carrier family 4, anion exchanger, member 3;cDNA FLJ75597, highly similar to Homo sapiens solute carrier family 4, anion exchanger, member 3 (SLC4A3), transcript variant 1, mRNA;Anion exchanger SLC4A3;Anion exchange protein 3;Neuronal band 3-like protein;Solute carrier family 4 member 3;Cardiac/brain band 3-like protein;CAE3/BAE3;cDNA FLJ51052, highly similar to Anion exchange protein 3;cD…	SLC4A3;AE3	A6H8L2;A8K1Q9;Q6YIQ9;P48751-1;P48751;B4DR53;B4DS65;P48751-2	1	0.112013	0.158887	0.194013	0.0180713		A6H8L2
Chromobox protein homolog 3;Heterochromatin protein 1 homolog gamma;Modifier 2 protein;HECH;Chromobox homolog 3 (HP1 gamma homolog, Drosophila);Chromobox homolog 3 (HP1 gamma homolog, Drosophila), isoform CRA_a;Coiled-coil domain containing 32, isoform CRA_c	CBX3;CCDC32;hCG_1745364;hCG_1999239;tcag7.173	Q13185;A4D177	1	0	0.339855	0	0.0182053		Q13185
TAR DNA-binding protein 43;TDP43;TDP43 splice variant 1;cDNA, FLJ92755, highly similar to Homo sapiens TAR DNA binding protein (TARDBP), mRNA;cDNA FLJ57180, highly similar to TAR DNA-binding protein 43;TAR DNA binding protein variant;cDNA FLJ58188, highly similar to TAR DNA-binding protein 43;TAR DNA binding protein	TARDBP;TDP43;RP4-635E18.2-003	Q13148;A4GUK4;A4GUK5;B2R629;B4DRW3;Q53H27;B4DJ45;B1AKP7	1	0.129191	0.406555	0.112527	0.0182348		Q13148
Heterogeneous nuclear ribonucleoproteins C1/C2;cDNA FLJ75154, highly similar to Homo sapiens heterogeneous nuclear ribonucleoprotein C (C1/C2), mRNA;cDNA, FLJ92712, highly similar to Homo sapiens heterogeneous nuclear ribonucleoprotein C (C1/C2) (HNRPC), transcript variant 1, mRNA;cDNA, FLJ92657, highly similar to Homo sapiens heterogeneous nuclear ribonucleoprotein C (C1/C2) (HNRPC), transcript …	HNRNPC;HNRPC;HNRNPCL1;HNRPCL1;hCG_2005612;LOC440563	P07910-1;P07910;A8K9A4;B2R603;P07910-2;B2R5W2;B3KX96;B4DY08;P07910-4;O60812;B2RP44;B5MCR6;Q6PKD2;B2RXH8;P07910-3;B4DSU6;B4DMJ1	1	0.131158	0.26923	0.0345286	0.0182612		P07910
ATP synthase protein 8;F-ATPase subunit 8;A6L	MT-ATP8;ATP8;ATPASE8;MTATP8;ATPase 8;ATPase8	P03928;A0S8D6;A0SBU5;B2XEL6;Q0Z7D7;Q3S924;Q3S937;Q5XTF0;Q7GY08;Q7YCD6;Q7YCG7;Q7YEG9;Q85BD0;Q85KW5;B4YC28;B4YCR0;Q4EWR0;Q5S8S7;Q5S8W6;Q8W8E1;A1DV59;A3R095;A4ZKZ1;A4ZLL2;A6Z7K1;A8JL09;B2MXR9;B2MZ68;B2XIJ9;Q305N4;Q4GAR3;Q4GUF2;Q5SAC3;Q6RLZ4;Q94P44;A0S208;A0S9D7;A1DT13;A1DVF0;A4ZL69;A6YTJ7;A6YXS5;A6YYT8;A6Z2R5;A6Z3V4;A6Z519;A8JMT6;B2CB77;B2XII6;B2XMG1;B6D898;B6D8I9;Q0ZK82;Q4F0Q1;Q4F196;Q4F675;Q4GFJ0;…	1	3.88123	0.350116	0.927755	0.0182649		P03928
SH3 domain-binding glutamic acid-rich-like protein;cDNA, FLJ79546, highly similar to SH3 domain-binding glutamic acid-rich-likeprotein	SH3BGRL	O75368;B0AZV6	1	0.19573	0.267124	0.11336	0.0183169		O75368
Poly [ADP-ribose] polymerase 1;ADPRT;NAD(+) ADP-ribosyltransferase 1;Poly[ADP-ribose] synthetase 1;Poly (ADP-ribose) polymerase 1;Poly (ADP-ribose) polymerase family, member 1, isoform CRA_a;cDNA, FLJ92658, highly similar to Homo sapiens poly (ADP-ribose) polymerase family, member 1 (PARP1), mRNA;cDNA FLJ53442, highly similar to Poly (ADP-ribose) polymerase 1 (EC 2.4.2.30);PARP1 protein;Poly(ADP-…	PARP1;ADPRT;PPOL;RP11-125A15.2-001;hCG_14746	P09874;B1ANJ4;B2R5W3;B4E0E1;Q05D33;Q96P95	1	0.205829	0.23799	0.0399495	0.0183467		P09874
Phosphatidylinositol transfer protein beta isoform;cDNA FLJ41390 fis, clone BRCAN2024572, moderately similar to Phosphatidylinositol transfer protein beta isoform;cDNA, FLJ93543, highly similar to Homo sapiens phosphotidylinositol transfer protein, beta (PITPNB),mRNA;Phosphatidylinositol transfer protein, beta;Phosphatidylinositol transfer protein alpha isoform;cDNA FLJ52181, highly similar to Ph…	PITPNB;RP3-353E16.2-003;PITPNA;PITPN;RP3-353E16.2-006	P48739-2;P48739;B3KVT6;B3KYB8;P48739-1;B2R7P6;B3KYB6;Q00169;B4E1U1;Q6NUL6;B3KYB7	1	0.111095	0.313739	0.192422	0.0183676		P48739
Protein RCC2;Telophase disk protein of 60 kDa;RCC1-like protein TD-60;RCC2 protein	RCC2;KIAA1470;TD60	Q9P258;A5PLK7	1	0	0.341474	0	0.0183698		Q9P258
V-type proton ATPase subunit E 1;Vacuolar proton pump subunit E 1;V-ATPase 31 kDa subunit;ATPase, H+ transporting, lysosomal 31kDa, V1 subunit E isoform 1;ATPase, H+ transporting, lysosomal 31kDa, V1 subunit E1, isoform CRA_b;cDNA, FLJ92725, Homo sapiens ATPase, H+ transporting, lysosomal 31kDa, V1 subunit Eisoform 1 (ATP6V1E1), mRNA;cDNA FLJ51833, highly similar to Homo sapiens ATPase, H+ transp…	ATP6V1E1;ATP6E;ATP6E2;hCG_21530	P36543;Q53Y06;A8MUE4;A8MUN4	1	0	0.341479	0	0.0183703		P36543
Prefoldin subunit 2;cDNA, FLJ96845, Homo sapiens prefoldin 2 (PFDN2), mRNA	PFDN2;PFD2;HSPC231;RP11-544M22.10-001;hCG_1995291	Q9UHV9;B1AQP2	1	0.24679	0.252626	0.0582568	0.0183712		Q9UHV9
Serine/threonine-protein phosphatase 2A 65 kDa regulatory subunit A alpha isoform;PP2A, subunit A, PR65-alpha isoform;PP2A, subunit A, R1-alpha isoform;Medium tumor antigen-associated 61 kDa protein;cDNA FLJ77680, highly similar to Homo sapiens protein phosphatase 2 (formerly 2A), regulatory subunit A (PR 65), alpha isoform (PPP2R1A), mRNA;cDNA FLJ78455, highly similar to Homo sapiens protein pho…	PPP2R1A;hCG_19686	P30153;A8K3H8;A8K7B7;B4DDF7;B4DQY1;B4DE69;Q8NB89;B3KQV6	1	0.524374	0.0679194	0.118432	0.018502		P30153
Ubiquitin carboxyl-terminal hydrolase 5;Ubiquitin thioesterase 5;Ubiquitin-specific-processing protease 5;Deubiquitinating enzyme 5;Isopeptidase T	USP5;ISOT	P45974-1;P45974;P45974-2	1	0.416479	0.270382	0.0703569	0.018514		P45974
T-complex protein 1 subunit eta;CCT-eta;HIV-1 Nef-interacting protein;cDNA FLJ77695, highly similar to Homo sapiens chaperonin containing TCP1, subunit 7 (eta) (CCT7),mRNA;Chaperonin containing TCP1, subunit 7 (Eta), isoform CRA_b;Chaperonin containing TCP1, subunit 7 (Eta) variant;CCT7 protein;cDNA FLJ54832, highly similar to T-complex protein 1 subunit eta;Putative uncharacterized protein CCT7	CCT7;CCTH;NIP7-1;hCG_1997313	Q99832;A8K7E6;Q53HV2;Q6IBT3;A8MWI8	1	0.278639	0.277799	0.0644453	0.0185297		Q99832
Histone H1.2;Histone H1d;Histone 1, H1c;cDNA FLJ76039, highly similar to Homo sapiens histone 1, H1c (HIST1H1C), mRNA	HIST1H1C;H1F2;hCG_1640485	P16403;A8K4I2	1	0.311516	0.171467	0.0674604	0.0186057		P16403
Telethonin;Titin cap protein;cDNA FLJ39009 fis, clone NT2RI2025565, highly similar to TELETHONIN;Titin-cap (Telethonin);Titin-cap (Telethonin), isoform CRA_a;Truncated telethonin	TCAP;hCG_30011	O15273;A2TDC0;A9QT26	1	14.8485	0.636681	5.20483	0.0187845		O15273
FACT complex subunit SPT16;Facilitates chromatin transcription complex subunit SPT16;FACT 140 kDa subunit;FACTp140;Chromatin-specific transcription elongation factor 140 kDa subunit;SUPT16H protein	SUPT16H;FACT140;FACTP140	Q9Y5B9;Q0VGA3	1	0	0.345558	0	0.0187872		Q9Y5B9
Apoptosis-inducing factor 1, mitochondrial;Programmed cell death protein 8;Apoptosis-inducing factor, mitochondrion-associated, 1;Programmed cell death 8 (Apoptosis-inducing factor), isoform CRA_b;Apoptosis-inducing factor;Striatal apoptosis-inducing factor;Programmed cell death 8 (Apoptosis-inducing factor), isoform CRA_c;Apoptosis-inducing factor short isoform 1	AIFM1;AIF;PDCD8;hCG_20999;RP3-438D16.2-003	O95831-1;O95831;A4QPB4;O95831-3;B2RB08;Q5RZ99;Q5RZA0;O95831-2;B1ALN1;Q2QKE4	1	2.88481	0.1072	0.751657	0.0188367		O95831
Electron transfer flavoprotein subunit beta;cDNA FLJ77343, highly similar to Homo sapiens electron-transfer-flavoprotein, beta polypeptide(ETFB), mRNA	ETFB;FP585	P38117-1;P38117;A8K766;P38117-2;B3KNY2	1	1.61021	0.134965	0.284001	0.0188485		P38117
Structural maintenance of chromosomes protein 2;Chromosome-associated protein E;XCAP-E homolog;cDNA FLJ78259;cDNA FLJ10093 fis, clone HEMBA1002363, highly similar to Structural maintenance of chromosome 2-like 1 protein;cDNA FLJ10623 fis, clone NT2RP2005520, highly similar to Structural maintenance of chromosome 2-like 1 protein;SMC2 protein;Mitotic chromosome condensation protein;Structural main…	SMC2;CAPE;SMC2L1;PRO0324;RP11-86L19.1-004	O95347-1;O95347;A8K984;B3KM27;B3KMB1;O95347-2;A0JLM9;Q05BV1;Q05D74;Q13497;Q2KQ72;Q32Q15;Q5T821;Q6IPS5;Q6P712;Q7Z2X1	1	0	0.346772	0	0.0189121		O95347
ATP-binding cassette sub-family B member 7, mitochondrial;ATP-binding cassette transporter 7;cDNA FLJ10556 fis, clone NT2RP2002479, highly similar to ATP-binding cassette sub-family B member 7, mitochondrial;cDNA FLJ53391, highly similar to ATP-binding cassette sub-family B member 7, mitochondrial	ABCB7;ABC7	O75027-2;O75027;B3KM98;O75027-1;B4DGL8	1	1.85108	0.0364588	0.261565	0.0189491		O75027
Rheumatoid factor G9 light chain;V2-14 protein;C1 segment protein;HCG2040025	V<lambda>3;V2-14;C1 segment;hCG_2040025	A0N5G3;Q5NV74;Q6NS96;Q96I69;A0M8Q9	1	16.6254	1.73205	3.72131	0.019122		A0N5G3
Coatomer subunit beta;Beta-coat protein	COPB1;COPB;MSTP026	P53618	1	0.303283	0.0890887	0.154066	0.0191394		P53618
Mitogen-activated protein kinase 14;Mitogen-activated protein kinase p38 alpha;Cytokine suppressive anti-inflammatory drug-binding protein;MAX-interacting protein 2;MAP kinase MXI2;SAPK2A;cDNA FLJ58214, highly similar to Mitogen-activated protein kinase 14 (EC2.7.11.24);Mitogen-activated protein kinase 14 isoform 4;Mitogen-activated protein kinase 14 isoform 5;Protein-serine/threonine kinase	MAPK14;CSBP;CSBP1;CSBP2;CSPB1;MXI2	Q16539-1;Q16539;B4E0K5;Q16539-3;B5TY32;B5TY33;Q15454;Q16539-4;Q16539-2	1	0.211491	0.165017	0.210331	0.019173		Q16539
TBC1 domain family member 4;Akt substrate of 160 kDa	TBC1D4;AS160;KIAA0603	O60343;A7E2X8;B4DU25;B6ETN8;B6ETN9;Q68D14	1	0	0.349314	0	0.0191745		O60343
WD40 repeat-containing protein SMU1;Smu-1 suppressor of mec-8 and unc-52 protein homolog;CDW3/SMU1;Smu-1 suppressor of mec-8 and unc-52 homolog (C. elegans), isoform CRA_a;Putative uncharacterized protein SMU1;cDNA FLJ54259, highly similar to Smu-1 suppressor of mec-8 and unc-52 protein homolog	SMU1;hCG_30278	Q2TAY7;A0MNN4;A8MXW4;B4E3L0	1	0	0.350531	0	0.0193007		Q2TAY7
DNA topoisomerase 2-alpha;DNA topoisomerase II, alpha isozyme;DNA topoisomerase 2	TOP2A;TOP2;hCG_1813144	P11388-4;P11388;A6NDM0;P11388-1;B2RTS1;P11388-3;P11388-2	1	0	0.35063	0	0.019311		P11388
NADH dehydrogenase [ubiquinone] 1 beta subcomplex subunit 6;NADH-ubiquinone oxidoreductase B17 subunit;Complex I-B17;NADH dehydrogenase (Ubiquinone) 1 beta subcomplex, 6, 17kDa, isoform CRA_a;cDNA FLJ76517, highly similar to Homo sapiens NADH dehydrogenase (ubiquinone) 1 beta subcomplex, 6, 17kDa (NDUFB6), nuclear gene encoding mitochondrial protein, transcript variant 1, mRNA;NADH dehydrogenase …	NDUFB6;hCG_30272;RP11-205M20.6-002	O95139;A8K0Y7;Q5VYT2	1	3.43918	0.215395	0.692772	0.0193138		O95139
Inosine-5'-monophosphate dehydrogenase 2;IMPDH-II;IMPD 2	IMPDH2;IMPD2	P12268	1	0.234593	0.292023	0.0332718	0.0193485		P12268
Agrin;cDNA FLJ11524 fis, clone HEMBA1002547, highly similar to Agrin;AGRN protein	AGRN;AGRIN	O00468;B3KMM7;Q15952;Q5XG79	1	0.283139	0.153641	0.0982807	0.0193806		O00468
Exocyst complex component 5;Exocyst complex component Sec10;Exocyst complex component 5, isoform CRA_c;cDNA, FLJ92889, Homo sapiens SEC10-like 1 (S. cerevisiae) (SEC10L1), mRNA;cDNA FLJ54619, highly similar to Exocyst complex component 5;cDNA FLJ54264, highly similar to Exocyst complex component 5;Putative uncharacterized protein DKFZp666H126	EXOC5;SEC10;SEC10L1;hCG_2028376;DKFZp666H126	O00471;B2R6C5;B4DHG4;B4E0U7;Q658M3;Q8IW24	1	0	0.351373	0	0.0193881		O00471
60S ribosomal protein L35;Similar to 60S ribosomal protein L35	RPL35;LOC154880;tcag7.829	P42766;A4D2M5	1	0.0601297	0.341385	0.104148	0.0194426		P42766
Annexin A1;Annexin-1;Annexin I;Lipocortin I;Calpactin II;Chromobindin-9;p35;Phospholipase A2 inhibitory protein;ANXA1 protein;Annexin A1, isoform CRA_a	ANXA1;ANX1;LPC1;RP11-71A24.1-002;hCG_17305;RP11-71A24.1-004	P04083;B5BU38;Q05BR2;Q5TZZ9;Q5T3N1	1	0.471631	0.304477	0.126256	0.0194629		P04083
Sarcoplasmic/endoplasmic reticulum calcium ATPase 2;Calcium pump 2;Calcium-transporting ATPase sarcoplasmic reticulum type, slow twitch skeletal muscle isoform;SR Ca(2+)-ATPase 2;Endoplasmic reticulum class 1/2 Ca(2+) ATPase;Putative uncharacterized protein ATP2A2;ATPase CA++ transporting cardiac muscle slow twitch 2;SERCA Ca(2+)-ATPase;cDNA FLJ55676, highly similar to Sarcoplasmic/endoplasmic re…	ATP2A2;ATP2B	P16615-2;P16615;P16615-1;A6NDN7;B0FYL2;B1PM99;B4DF05	1	1.45909	0.181244	0.211308	0.0195041		P16615
Ankycorbin;Ankyrin repeat and coiled-coil structure-containing protein;Retinoic acid-induced protein 14;Novel retinal pigment epithelial cell protein;cDNA FLJ13073 fis, clone NT2RP3001854, highly similar to Ankycorbin;cDNA FLJ53145, highly similar to Ankycorbin	RAI14;KIAA1334;NORPEG	Q9P0K7-2;Q9P0K7;Q9P0K7-1;Q9P0K7-3;B3KMZ9;B4DNL3	1	0	0.353365	0	0.0195958		Q9P0K7
Transmembrane emp24 domain-containing protein 5;cDNA, FLJ93205, Homo sapiens CGI-100 protein (CGI-100), mRNA;cDNA FLJ54845, highly similar to Transmembrane emp24 domain-containing protein 5;TMED5 protein;Transmembrane emp24 protein transport domain containing 5	TMED5;CGI-100;UNQ397/PRO733;RP5-976O13.2-005;RP5-976O13.2-004	Q9Y3A6;B2R703;B4DDR7;Q49AG2;B1AKT4;B1AKT3	1	0	0.353495	0	0.0196095		Q9Y3A6
Protein disulfide-isomerase A6;Protein disulfide isomerase P5;Thioredoxin domain-containing protein 7;cDNA FLJ16143 fis, clone BRAMY2038516, highly similar to Protein disulfide-isomerase A6 (EC 5.3.4.1);Putative uncharacterized protein PDIA6;cDNA FLJ76201, highly similar to Homo sapiens protein disulfide isomerase family A, member 6 (PDIA6), mRNA;Protein disulfide isomerase family A, member 6, is…	PDIA6;TXNDC7;P5;hCG_22033	Q15084-2;Q15084;B3KY95;B5MBW7;Q15084-1;Q53RC7	1	0.325146	0.229867	0.0375329	0.0196336		Q15084
cDNA FLJ13729 fis, clone PLACE3000121, weakly similar to VESICULAR TRAFFIC CONTROL PROTEIN SEC15;Exocyst complex component 6B;Exocyst complex component Sec15B;SEC15-like protein 2	EXOC6B;KIAA0919;SEC15B;SEC15L2	Q9H8D6;Q9Y2D4	1	0.0766707	0.208506	0.132798	0.0196777		Q9H8D6
Putative uncharacterized protein DKC1;H/ACA ribonucleoprotein complex subunit 4;Dyskerin;Nucleolar protein family A member 4;snoRNP protein DKC1;Nopp140-associated protein of 57 kDa;Nucleolar protein NAP57;CBF5 homolog	DKC1;NOLA4	A8MUT5;O60832;A8MV56	1	0	0.354429	0	0.0197071		A8MUT5
Proliferation-associated protein 2G4;Cell cycle protein p38-2G4 homolog;ErbB3-binding protein 1;cDNA FLJ75526, highly similar to Homo sapiens proliferation-associated 2G4, 38kDa (PA2G4), mRNA;PA2G4 protein	PA2G4;EBP1	Q9UQ80;A8K6Y1;Q6PIN5;Q05D08	1	0.334881	0.241779	0.12976	0.01972		Q9UQ80
60S ribosomal protein L4;L1;cDNA FLJ78454, highly similar to Homo sapiens ribosomal protein L4 (RPL4), mRNA;Ribosomal protein L4, isoform CRA_c;cDNA FLJ78445, highly similar to Homo sapiens ribosomal protein L4 (RPL4), mRNA;cDNA FLJ56689, highly similar to 60S ribosomal protein L4;Ribosomal protein L4 variant;cDNA FLJ50996, highly similar to 60S ribosomal protein L4;cDNA FLJ50994, moderately simi…	RPL4;RPL1;hCG_2004318	P36578;A8K502;B4DFI6;Q53G74;Q59GY2;B4DMJ6;B4DMJ2	1	0.270918	0.276541	0.0322673	0.0197687		P36578
LIM and cysteine-rich domains protein 1;Dyxin;cDNA FLJ55018, highly similar to LIM and cysteine-rich domains protein 1	LMCD1	Q9NZU5;B4DG80	1	0.411516	0.571774	0.4171	0.0198771		Q9NZU5
AP-2 complex subunit beta-1;Adapter-related protein complex 2 beta-1 subunit;Beta2-adaptin;Beta-adaptin;Plasma membrane adaptor HA2/AP2 adaptin beta subunit;Clathrin assembly protein complex 2 beta large chain;AP105B;cDNA FLJ78733, highly similar to Homo sapiens adaptor-related protein complex 2, beta 1 subunit (AP2B1), transcript variant 1, mRNA;cDNA FLJ78481, highly similar to Homo sapiens adap…	AP2B1;ADTB2;CLAPB1;DKFZp781K0743;hCG_1992160	P63010-2;P63010;A8K0G3;A8K916;B4DWG4;B4E261;Q68DI0;Q96EL6;P63010-1;Q7Z451;B4DIL5	1	0.374564	0.0670781	0.167792	0.019879		P63010
Actin-related protein 10;hARP11;cDNA, FLJ96603, highly similar to Homo sapiens actin-related protein 10 homolog (S. cerevisiae) (ACTR10), mRNA;ACTR10 protein;Uncharacterized hypothalamus protein HARP11 variant;Full-length cDNA clone CS0DJ008YJ17 of T cells (Jurkat cell line) of Homo sapiens (human);Full-length cDNA clone CS0DI035YL21 of Placenta of Homo sapiens (human)	ACTR10;ACTR11;ARP11	Q9NZ32;B2RDG9;Q05DQ7;Q53H79;Q53HF6;Q86SY7;Q86TY2	1	0	0.356485	0	0.0199229		Q9NZ32
DNA replication licensing factor MCM5;CDC46 homolog;P1-CDC46;cDNA FLJ78580, highly similar to Homo sapiens MCM5 minichromosome maintenance deficient 5, cell division cycle 46 (MCM5), mRNA;MCM5 minichromosome maintenance deficient 5, cell division cycle 46 (S. cerevisiae), isoform CRA_a;Minichromosome maintenance complex component 5;cDNA, FLJ92902, Homo sapiens MCM5 minichromosome maintenance defi…	MCM5;CDC46;RP5-824I19__A.1-001;hCG_41525;RP5-824I19__A.1-002;RP5-824I19__A.1-011	P33992;A8K521;B1AHB0;B4DQ39;Q53FG5;B1AHB1;B3KVF0;B1AHB2;B4DVK5	1	0	0.356826	0	0.0199588		P33992
Guanine nucleotide-binding protein G(I)/G(S)/G(O) subunit gamma-7	GNG7;GNGT7	O60262	1	0.162305	0.222084	0.28112	0.0199597		O60262
Integrin alpha-9;Integrin alpha-RLC;ITGA9 protein	ITGA9	Q13797;Q8N6H6	1	0	0.357134	0	0.0199912		Q13797
Prolylcarboxypeptidase (Angiotensinase C), isoform CRA_b;Putative uncharacterized protein PRCP;Lysosomal Pro-X carboxypeptidase;Prolylcarboxypeptidase;Proline carboxypeptidase;Angiotensinase C;Lysosomal carboxypeptidase C;cDNA FLJ34467 fis, clone HLUNG2003246, highly similar to Lysosomal Pro-X carboxypeptidase (EC3.4.16.2);cDNA FLJ33528 fis, clone BRAMY2007110, highly similar to Lysosomal Pro-X c…	PRCP;PCP;hCG_27286	A8MU24;B2R7B7;B3KRK5;P42785;B3KR26;B5BU34	1	0	0.357467	0	0.0200263		A8MU24
Sorting nexin-9;SH3 and PX domain-containing protein 1;SH3 and PX domain-containing protein 3A;cDNA, FLJ95128, highly similar to Homo sapiens sorting nexin 9 (SNX9), mRNA;cDNA FLJ45417 fis, clone BRHIP3033811, highly similar to Sorting nexin-9;Sorting nexin 9 variant;WASP interactor protein	SNX9;SH3PX1;SH3PXD3A;WISP	Q9Y5X1;B2RAU5;B3KXH8;Q59ES5;O95061	1	0.382457	0.215721	0.00783192	0.0200398		Q9Y5X1
Formyltetrahydrofolate dehydrogenase isoform a variant;Aldehyde dehydrogenase 1 family, member L1 variant;10-formyltetrahydrofolate dehydrogenase;Aldehyde dehydrogenase family 1 member L1;cDNA FLJ53469, highly similar to 10-formyltetrahydrofolate dehydrogenase (EC 1.5.1.6)	ALDH1L1;FTHFD	Q53H87;Q53HP5;Q59G10;O75891;B4DG36	1	7.02157	0.915366	1.92345	0.0200796		Q53H87
Splicing factor 3 subunit 1;Spliceosome-associated protein 114;SF3a120;cDNA FLJ55438, highly similar to Splicing factor 3 subunit 1	SF3A1;SAP114	Q15459;B4E091	1	0.198808	0.143198	0.174136	0.0201175		Q15459
NADH dehydrogenase [ubiquinone] iron-sulfur protein 7, mitochondrial;NADH-ubiquinone oxidoreductase 20 kDa subunit;Complex I-20kD;PSST subunit;NADH-ubiquinone oxidoreductase Fe-S protein 7 variant;NADH:ubiquinone oxidoreductase PSST subunit;My017 protein;cDNA FLJ34850 fis, clone NT2NE2011758, highly similar to NADH-UBIQUINONE OXIDOREDUCTASE 20 kDa SUBUNIT (EC 1.6.5.3);Putative uncharacterized pro…	NDUFS7	O75251;Q7LD69;Q9H3K5;Q8NAS7;A8K0V6;B3KRI2;Q6ZQU6	1	2.85361	0.191158	0.843339	0.0201466		O75251
40S ribosomal protein SA;Laminin receptor 1;37/67 kDa laminin receptor;Laminin-binding protein precursor p40;37 kDa laminin receptor precursor;67 kDa laminin receptor;Colon carcinoma laminin-binding protein;NEM/1CHD4;Multidrug resistance-associated protein MGr1-Ag;Putative uncharacterized protein RPSAP18;Laminin receptor-like protein LAMRL5	RPSA;LAMBR;LAMR1;RPSAP18;LAMR1P15	P08865;A6NE09;Q96RS2;A6NIS7;A6NDU1	1	0.244317	0.155198	0.141229	0.0201577		P08865
UPF0461 protein C5orf24	C5orf24	Q7Z6I8-1;Q7Z6I8;Q7Z6I8-2	1	0	0.359204	0	0.0202098		Q7Z6I8
F-box-like/WD repeat-containing protein TBL1XR1;Transducin beta-like 1X-related protein 1;Nuclear receptor corepressor/HDAC3 complex subunit TBLR1;TBL1-related protein 1;F-box-like/WD repeat-containing protein TBL1X;Transducin beta-like protein 1X;Transducin-beta-like protein 1, X-linked;SMAP55;Transducin beta-like 1X variant	TBL1XR1;IRA1;TBLR1;TBL1X;TBL1	Q9BZK7;A8K044;A8K4J7;O60907;Q59F53	1	0	0.360901	0	0.0203896		Q9BZK7
Mevalonate kinase;Mevalonate kinase 1;Mevalonate kinase (Mevalonic aciduria), isoform CRA_c;cDNA, FLJ96772, Homo sapiens mevalonate kinase (mevalonic aciduria) (MVK), mRNA;Mevalonate kinase variant	MVK;hCG_40321	Q03426;B2RDU6;Q59ET9	1	0	0.360911	0	0.0203907		Q03426
UPF0389 protein FAM162A;E2-induced gene 5 protein;cDNA FLJ59673, highly similar to Homo sapiens growth and transformation-dependent protein (E2IG5), mRNA	FAM162A;C3orf28;E2IG5;DC16;FWP001	Q96A26;B4DF97	1	2.54335	0.167573	0.412356	0.0204689		Q96A26
Probable ATP-dependent RNA helicase DDX5;DEAD box protein 5;RNA helicase p68;cDNA FLJ53366, highly similar to Probable ATP-dependent RNA helicase DDX5 (EC 3.6.1.-);ATP-dependent RNA helicase DDX5 (DEAD (Asp-Glu-Ala-Asp) box polypeptide 5, isoform CRA_a);ATP-dependent RNA helicase DDX5;Putative uncharacterized protein;Putative uncharacterized protein DKFZp686J01190;cDNA FLJ59339, highly similar to…	DDX5;G17P1;HELR;HLR1;hCG_27643;DKFZp686J01190	P17844;B4DN41;B5BU21;B5BUE6;Q59E92;Q7Z2V5;B4DLW8;B4DNG2	1	0	0.361666	0	0.0204709		P17844
Troponin I, cardiac muscle;Cardiac troponin I;Troponin I type 3 cardiac;Mutant cardiac troponin I;TNNI3 protein;Troponin I type 3 (Cardiac);Troponin I, cardiac variant;Troponin I, cardiac	TNNI3;TNNC1	P19429;A8CLQ8;A8CLR6;A8CLS6;A8CN18;A9UD06;B6D427;Q6FGU5;Q6FGX2	1	6.91868	0.210035	2.22882	0.0205137		P19429
Transaldolase;cDNA FLJ57988, highly similar to Transaldolase (EC 2.2.1.2);Transaldolase 1, isoform CRA_c	TALDO1;TAL;TALDO;TALDOR;hCG_18330;TALH	P37837;B4DID5;Q8WZ45;Q9UMF8	1	0.529818	0.276655	0.108467	0.0205881		P37837
Metastasis-associated protein MTA2;Metastasis-associated 1-like 1;p53 target protein in deacetylase complex;Putative uncharacterized protein DKFZp686F2281;cDNA FLJ51637, highly similar to Metastasis-associated protein MTA2	MTA2;MTA1L1;PID;DKFZp686F2281	O94776;Q68DB1	1	0	0.362923	0	0.0206047		O94776
Anaphase-promoting complex subunit 7;Cyclosome subunit 7;Anaphase promoting complex subunit 7;ANAPC7 protein;Putative uncharacterized protein DKFZp762H177;cDNA FLJ11747 fis, clone HEMBA1005530, highly similar to Anaphase-promoting complex subunit 7	ANAPC7;APC7;DKFZp762H177	Q9UJX3;A5D8X2;A8KAQ7;Q2M2R1;Q4KMX6;Q69YV3;B3KMP2	1	0	0.363603	0	0.0206773		Q9UJX3
60S ribosomal protein L17;60S ribosomal protein L23;PD-1;HCG24487, isoform CRA_c;cDNA, FLJ92089, Homo sapiens ribosomal protein L17 (RPL17), mRNA;cDNA FLJ52184, highly similar to 60S ribosomal protein L17;Putative uncharacterized protein RPL17P34;Putative uncharacterized protein ENSP00000352143	RPL17;hCG_24487;RPL17P34	P18621;B2R4H3;B4E3C2;A8MU02;B5ME31	1	0	0.364374	0	0.0207597		P18621
cDNA, FLJ92798, highly similar to Homo sapiens annexin A7 (ANXA7), transcript variant 2, mRNA;Annexin A7;Annexin-7;Annexin VII;Synexin;cDNA, FLJ93494, highly similar to Homo sapiens annexin A7 (ANXA7), transcript variant 1, mRNA;Annexin VII isoform 1 variant;cDNA FLJ55060, highly similar to Annexin A7;cDNA FLJ54149, highly similar to Annexin A7;cDNA FLJ54191, highly similar to Annexin A7	ANXA7;ANX7;SNX;OK/SW-cl.95	B2R657;P20073-1;P20073;B2R7L2;Q53HM8;P20073-2;B4DHY4;B4DT77;B4DWU2	1	1.43067	0.272522	0.384393	0.0207931		B2R657
Structural maintenance of chromosomes flexible hinge domain-containing protein 1	SMCHD1;KIAA0650	A6NHR9-1;A6NHR9;A6NHR9-2;A6NHR9-3	1	0	0.365297	0	0.0208585		A6NHR9
Transcription elongation factor A protein 3;Transcription elongation factor S-II protein 3;Transcription elongation factor TFIIS.h;Transcription elongation factor A (SII), 3;cDNA FLJ78474, highly similar to Homo sapiens transcription elongation factor A (SII), 3 (TCEA3), mRNA;Rhabdomyosarcoma antigen MU-RMS-40.22	TCEA3;TFIISH;RP5-1057J7.5-001	O75764;A8K2K7;Q5DR83	1	0	0.365774	0	0.0209096		O75764
Platelet-activating factor acetylhydrolase IB subunit gamma;PAF acetylhydrolase 29 kDa subunit;PAF-AH subunit gamma;PAFAH subunit gamma;PAFAH1B3 protein;Platelet-activating factor acetylhydrolase, isoform Ib, gamma subunit 29kDa, isoform CRA_a	PAFAH1B3;PAFAHG;hCG_21889	Q15102;Q53X88	1	0	0.365905	0	0.0209237		Q15102
cDNA FLJ57954, highly similar to 60S ribosomal protein L28;60S ribosomal protein L28;Ribosomal protein L28, isoform CRA_a;cDNA, FLJ92020, Homo sapiens ribosomal protein L28 (RPL28), mRNA;Ribosomal protein L28;Ribosomal protein L28 variant	RPL28;hCG_38234	B4DEP9;P46779;B2R4A6;O60251;Q59F34	1	0.0755839	0.272685	0.0925346	0.0210178		B4DEP9
Glutaryl-CoA dehydrogenase, mitochondrial;cDNA FLJ76015, highly similar to Homo sapiens glutaryl-Coenzyme A dehydrogenase (GCDH), nuclear gene encoding mitochondrial protein, transcript variant 1, mRNA;Glutaryl-Coenzyme A dehydrogenase, isoform CRA_a;cDNA FLJ59559, highly similar to Glutaryl-CoA dehydrogenase, mitochondrial (EC 1.3.99.7);cDNA FLJ59956, highly similar to Glutaryl-CoA dehydrogenase…	GCDH;hCG_172482	Q92947-1;Q92947;A8K2Z2;Q92947-2;B4DK85;B4DQF2;B4DUY0	1	1.97303	0.310062	0.419365	0.0210537		Q92947
40S ribosomal protein S3;Ribosomal protein S3;cDNA, FLJ93526, Homo sapiens ribosomal protein S3 (RPS3), mRNA;Ribosomal protein S3 variant;RPS3 protein	RPS3;OK/SW-cl.26;hCG_2017209	P23396;B2R7N5;Q53G83;Q9NQS8;A7E2S3	1	0.23456	0.231106	0.0513009	0.0210737		P23396
Receptor expression-enhancing protein 5;Polyposis locus protein 1;TB2 protein;cDNA, FLJ92888, highly similar to Homo sapiens likely ortholog of mouse deleted in polyposis 1 (DP1), mRNA	REEP5;C5orf18;DP1;TB2	Q00765;B2R6C4	1	1.92492	0.280582	0.53881	0.0211637		Q00765
cDNA FLJ56334, highly similar to SEC13-related protein;SEC13-like 1 isoform b variant;Protein SEC13 homolog;SEC13-related protein;SEC13-like protein 1;Putative uncharacterized protein SEC13	SEC13;D3S1231E;SEC13L1;SEC13R	B4DXJ1;Q53GB2;P55735;A8MV37;Q59FA6;A8MXL6	1	0.212255	0.449936	0.240131	0.0211782		B4DXJ1
Protein SET;Phosphatase 2A inhibitor I2PP2A;Template-activating factor I;HLA-DR-associated protein II;PHAPII;Inhibitor of granzyme A-activated DNase;SET nuclear oncogene;cDNA FLJ51749, highly similar to Protein SET;SET translocation (Myeloid leukemia-associated), isoform CRA_a	SET;RP11-216B9.3-001;hCG_40357	Q01105-1;Q01105;Q5VXV3	1	0	0.368343	0	0.0211859		Q01105
Serine/threonine-protein kinase N2;Protein kinase C-like 2;Protein-kinase C-related kinase 2;cDNA FLJ52349, highly similar to Serine/threonine-protein kinase N2 (EC 2.7.11.13);cDNA FLJ61394, highly similar to Serine/threonine-protein kinase N2 (EC 2.7.11.13);cDNA FLJ50881, highly similar to Serine/threonine-protein kinase N2 (EC 2.7.11.13);PKN2 protein;Protein kinase N2;Protein kinase N2, isoform…	PKN2;PRK2;PRKCL2;RP5-905H16.1-002;hCG_23733	Q16513;B4DQ21;B4DTP5;B4DVG1;Q08AF4;Q6P5W9;B1AL79;Q9UHS4	1	0	0.368976	0	0.0212542		Q16513
Cytochrome c oxidase subunit 7A-related protein, mitochondrial;Cytochrome c oxidase subunit VIIa-related protein;COX7a-related protein;EB1;COX7A2L protein;cDNA FLJ35592 fis, clone SPLEN2007695, highly similar to Cytochrome c oxidase subunit VIIa-related protein, mitochondrial;Cytochrome c oxidase subunit VIIa polypeptide 2 like, isoform CRA_a;Putative uncharacterized protein COX7A2L	COX7A2L;COX7AR;COX7RP;hCG_1783904	O14548;Q6FGA0;A8MZH9;B5MD01	1	1.57876	0.339539	0.547422	0.0213122		O14548
SUMO-activating enzyme subunit 2;Ubiquitin-like 1-activating enzyme E1B;Anthracycline-associated resistance ARX;cDNA, FLJ96587, highly similar to Homo sapiens SUMO-1 activating enzyme subunit 2 (UBA2), mRNA;cDNA FLJ13058 fis, clone NT2RP3001587, highly similar to Ubiquitin-like 1-activating enzyme E1B;cDNA FLJ14052 fis, clone HEMBA1006914, highly similar to Ubiquitin-like 1-activating enzyme E1B;…	UBA2;SAE2;UBLE1B;HRIHFB2115	Q9UBT2;B2RDF5;B3KMZ6;B3KNA3;B3KWB9	1	0	0.369663	0	0.0213285		Q9UBT2
Membrane-associated progesterone receptor component 2;Progesterone membrane-binding protein;Steroid receptor protein DG6	PGRMC2;DG6;PMBP	O15173	1	0.370369	0.298675	0.132588	0.0213418		O15173
Small nuclear ribonucleoprotein G-like protein;Small nuclear ribonucleoprotein G;SNRPG protein	SNRPG;PBSCG	A8MWD9;P62308;Q49AN9	1	0	0.369842	0	0.0213477		A8MWD9
5'-3' exoribonuclease 2;DHM1-like protein;cDNA FLJ10711 fis, clone NT2RP3000917, highly similar to 5'-3' exoribonuclease 2 (EC 3.1.11.-);cDNA FLJ55645, highly similar to 5'-3' exoribonuclease 2 (EC 3.1.11.-);cDNA FLJ54526, highly similar to 5'-3' exoribonuclease 2 (EC 3.1.11.-)	XRN2	Q9H0D6-1;Q9H0D6;B3KMC9;B4DZC3;B4E0B9;Q9H0D6-2	1	0	0.370622	0	0.0214322		Q9H0D6
Phosphatidylethanolamine-binding protein 1;Prostatic-binding protein;HCNPpp;Neuropolypeptide h3;Raf kinase inhibitor protein;Hippocampal cholinergic neurostimulating peptide;Phosphatidylethanolamine binding protein 1, isoform CRA_a;cDNA, FLJ92194, Homo sapiens prostatic binding protein (PBP), mRNA;cDNA FLJ51535, highly similar to Phosphatidylethanolamine-binding protein 1	PEBP1;PBP;PEBP;hCG_2016249	P30086;B2R4S1;B4DRT4	1	2.00824	0.0604486	0.31351	0.0214617		P30086
Midkine;Neurite outgrowth-promoting protein;Midgestation and kidney protein;Amphiregulin-associated protein;Neurite outgrowth-promoting factor 2;Mutant truncated midkine A	MDK;MK1;NEGF2	P21741;Q2LEK4	1	0	0.370924	0	0.0214649		P21741
cGMP-inhibited 3',5'-cyclic phosphodiesterase A;Cyclic GMP-inhibited phosphodiesterase A	PDE3A	Q14432	1	2.83283	0.77039	0.365081	0.0214979		Q14432
Cathepsin D;Cathepsin D light chain;Cathepsin D heavy chain	CTSD;CPSD	P07339	1	6.58374	0.167829	2.23179	0.0215023		P07339
Protein unc-45 homolog B;SMUNC45	UNC45B;CMYA4;UNC45	Q8IWX7-1;Q8IWX7;Q8IWX7-3;Q8IWX7-2	1	0.296151	0.224151	0.0605845	0.0215558		Q8IWX7
Retinol dehydrogenase 11;Retinal reductase 1;Prostate short-chain dehydrogenase/reductase 1;Androgen-regulated short-chain dehydrogenase/reductase 1;HCV core-binding protein HCBP12;cDNA FLJ90268 fis, clone NT2RM4001768, highly similar to Retinol dehydrogenase 11 (EC 1.1.1.-);cDNA, FLJ95268, highly similar to Homo sapiens retinol dehydrogenase 11 (all-trans and 9-cis) (RDH11), mRNA;Retinol dehydro…	RDH11;ARSDR1;PSDR1;CGI-82;hCG_21906	Q8TC12-1;Q8TC12;B2RB26;B3KQ19;Q0QD40;Q8TC12-2;A8K062;B4DDW0	1	0.205472	0.312212	0.178092	0.0217022		Q8TC12
D-3-phosphoglycerate dehydrogenase;Phosphoglycerate dehydrogenase, isoform CRA_b;cDNA, FLJ96405, Homo sapiens phosphoglycerate dehydrogenase (PHGDH), mRNA;cDNA FLJ35987 fis, clone TESTI2014269, highly similar to D-3-phosphoglycerate dehydrogenase (EC 1.1.1.95);Phosphoglycerate dehydrogenase;PHGDH protein;3-phosphoglycerate dehydrogenase	PHGDH;PGDH3;hCG_37613;RP4-683H9.1-002	O43175;B2RD08;B3KSC3;Q5SZU1;Q8N5M8;Q96RV5;Q96RV6;Q96RV7;Q96RV8;Q96RV9;Q9UMY2;Q9UMY3	1	0.0328597	0.405442	0.0569147	0.0218668		O43175
FK506-binding protein 3;Peptidyl-prolyl cis-trans isomerase;25 kDa FKBP;FKBP-25;Rapamycin-selective 25 kDa immunophilin;FK506 binding protein 3, 25kDa;cDNA, FLJ92182, Homo sapiens FK506 binding protein 3, 25kDa (FKBP3), mRNA;FK506-binding protein 3 variant	FKBP3;FKBP25;hCG_19864	Q00688;B2R4Q9;Q53GD8	1	0.105333	0.394512	0.182442	0.021927		Q00688
NADH dehydrogenase [ubiquinone] flavoprotein 2, mitochondrial;NADH-ubiquinone oxidoreductase 24 kDa subunit;cDNA FLJ78041, highly similar to Homo sapiens NADH dehydrogenase (ubiquinone) flavoprotein 2, 24kDa (NDUFV2), mRNA;NDUFV2 protein;NADH dehydrogenase (Ubiquinone) flavoprotein 2, 24kDa;cDNA, FLJ92411, Homo sapiens NADH dehydrogenase (ubiquinone) flavoprotein 2, 24kDa(NDUFV2), mRNA;24-kDa sub…	NDUFV2;hCG_1994226	P19404;A8K750;Q6IB76;Q6IPW4;Q6LEN9;Q9UEH5;A6NK33	1	2.7497	0.0774612	0.607591	0.022089		P19404
Leucine-rich repeat flightless-interacting protein 2;LRR FLII-interacting protein 2;cDNA FLJ58304, moderately similar to Leucine-rich repeat flightless-interacting protein 2;cDNA FLJ75479	LRRFIP2	Q9Y608-1;Q9Y608;B4DY63;A8K649;Q9Y608-2	1	0	0.376681	0	0.0220926		Q9Y608
Spliceosome RNA helicase BAT1;DEAD box protein UAP56;56 kDa U2AF65-associated protein;ATP-dependent RNA helicase p47;HLA-B-associated transcript-1;HLA-B associated transcript 1;cDNA FLJ53073, highly similar to Spliceosome RNA helicase Bat1 (EC 3.6.1.-);HCG2005638, isoform CRA_c;HLA-B associated transcript 1 variant;cDNA FLJ54033, highly similar to Spliceosome RNA helicase Bat1 (EC 3.6.1.-)	BAT1;UAP56;XXbac-BCX270M2.2-006;DADB-26I14.7-006;DAMA-25N12.12-006;DAMA-BMC190B12.8-006;DAQB-72H16.1-006;DASS-161H22.1-006;XXbac-BPG296P20.6-006;DAAP-97M17.4-003;DASS-161H22.1-017;XXbac-BCX270M2.2-017;DAQB-72H16.1-017;DAMA-25N12.12-017;DADB-26I14.7-017;DAMA-BMC190B12.8-017;XXbac-BPG296P20.6-019;DASS-161H22.1-019;XXbac-BCX270M2.2-019;DAQB-72H16.1-019;DAMA-25N12.12-019;DADB-26I14.7-019;DAMA-BMC190B…	Q13838-2;Q13838;Q13838-1;Q5STA0;Q5STU3;B0V2L1;A2BF54;A6PWH1;B0S4X2;B0S8C3;B0UZ18;B0UZ99;A2AB31;A2BF53;A6PWH0;B0S4X1;B0S8C2;B0UZ17;B0UZ98;B4DP52;B0V2L2;Q59G92;A2BF56;B0S4X4;B0S8B3;B0UZ21;B0UZA2;Q5STA2;Q5STU9;A2BF57;A6PWH2;B0S4X3;B0S8B2;B0UZ20;B0UZA1;A2BF55;A6PWH3;B0S8C4;B0UZ19;B0UZA0;Q5RJ65;B0V2L3;B0V2L0;B4DIJ6;B0V2L6;B0V2L5;B0V2L4	1	0.131751	0.241166	0.147893	0.0221191		Q13838
Centromere/kinetochore protein zw10 homolog;ZW10 protein;cDNA, FLJ93375, highly similar to Homo sapiens ZW10, kinetochore associated, homolog (Drosophila) (ZW10), mRNA;cDNA FLJ56672, highly similar to Centromere/kinetochore protein zw10 homolog;cDNA FLJ56935, highly similar to Centromere/kinetochore protein zw10 homolog	ZW10	O43264;A1A528;B2R7C2;B4DUQ3;B4E1J7	1	0	0.37713	0	0.0221418		O43264
NADH dehydrogenase [ubiquinone] iron-sulfur protein 4, mitochondrial;NADH-ubiquinone oxidoreductase 18 kDa subunit;Complex I-18 kDa;Complex I-AQDQ	NDUFS4	O43181	1	2.56861	0.153842	0.678427	0.0221435		O43181
Serine hydroxymethyltransferase, mitochondrial;Glycine hydroxymethyltransferase;Serine hydroxymethyltransferase;cDNA FLJ58585, highly similar to Serine hydroxymethyltransferase, mitochondrial (EC 2.1.2.1);Serine hydroxymethyltransferase 2 (Mitochondrial), isoform CRA_h	SHMT2;DKFZp686P09201;hCG_41231	P34897;B4DJQ3;Q5HYG8;Q8N1A5;Q53ET4;B4DP88;B4E1G2;B4DW25;B4DWA7;Q5BJF5;B4DJ63;B4DLV4	1	0.146334	0.306598	0.0314125	0.0221666		P34897
Serine/arginine repetitive matrix protein 2;Serine/arginine-rich splicing factor-related nuclear matrix protein of 300 kDa;Splicing coactivator subunit SRm300;300 kDa nuclear matrix antigen;SRRM2 protein;KIAA0324	SRRM2;KIAA0324;SRL300;SRM300;HSPC075	Q9UQ35-1;Q9UQ35;A0AUK8;O60382	1	0	0.377654	0	0.0221994		Q9UQ35
RNA-binding protein Raly;hnRNP associated with lethal yellow homolog;Autoantigen p542;Heterogeneous nuclear ribonucleoprotein C-like 2;RNA binding protein (Autoantigenic, hnRNP-associated with lethal yellow) long isoform variant;RNA binding protein, autoantigenic (HnRNP-associated with lethal yellow homolog (Mouse));cDNA FLJ77422, highly similar to Homo sapiens RNA binding protein, autoantigenic …	RALY;HNRPCL2;P542;hCG_37136;RP1-64K7.1-007;RP1-64K7.1-004;RP1-64K7.1-005	Q9UKM9-1;Q9UKM9;Q53GL6;Q9UKM9-2;A8K4T9;Q5QPL9;B4DSJ1;Q5QPM1;Q5QPM0	1	0.195481	0.323018	0.0204673	0.0222082		Q9UKM9
Nucleophosmin;Nucleolar phosphoprotein B23;Numatrin;Nucleolar protein NO38;Truncated nucleolar phosphoprotein B23;cDNA FLJ76122, highly similar to Homo sapiens nucleophosmin (nucleolar phosphoprotein B23, numatrin) (NPM1), transcript variant 1, mRNA;Nucleophosmin (Nucleolar phosphoprotein B23, numatrin), isoform CRA_a;Nucleophosmin 1 isoform 1;NPM1 protein;Nucleophosmin (Nucleolar phosphoprotein …	NPM1;NPM;hCG_1979311	P06748-1;P06748;A4ZU86;A8K3N7;B5BU00;Q9BTI9;P06748-2;Q9BYG9;Q9NX34;Q504R3	1	0.138433	0.313454	0.0347035	0.0224408		P06748
40S ribosomal protein S27a;Ribosomal protein S27a, isoform CRA_c;cDNA, FLJ96793, Homo sapiens ribosomal protein S27a (RPS27A), mRNA;Ribosomal protein S27a;Ribosomal protein S27A;cDNA FLJ75516, highly similar to Xenopus tropicalis ubiquitin C, mRNA;Ubiquitin C variant;Putative uncharacterized protein;UBC protein;cDNA FLJ32377 fis, clone SKMUS1000014, highly similar to Polyubiquitin 9;Putative unch…	RPS27A;UBA80;UBCEP1;hCG_1987923;UBC;DKFZp434K0435;UBB;hCG_1998947;UBA52;UBCEP2;hCG_37048	P62979;B2RDW1;Q5RKT7;Q8WYN9;A8K674;Q59EM9;Q66K58;Q96H31;Q96MH4;Q9UFQ0;Q96C32;Q5U5U6;B4DV12;Q5UGI3;P62987;Q3MIH3;P62988;Q5PY61;Q49A90;A8CGI2	1	0.544477	0.232421	0.12683	0.0224876		P62979
Putative RNA-binding protein Luc7-like 2;cDNA FLJ36545 fis, clone TRACH2006670, highly similar to RNA-binding protein Luc7-like 2;cDNA FLJ34725 fis, clone MESAN2005958, highly similar to RNA-binding protein Luc7-like 2;cDNA FLJ36762 fis, clone UTERU2018955, highly similar to RNA-binding protein Luc7-like 2	LUC7L2;CGI-59;CGI-74	Q9Y383-1;Q9Y383;B3KSL5;Q9Y383-2;B3KRR1;B3KSP8	1	0	0.381348	0	0.0226066		Q9Y383
6.8 kDa mitochondrial proteolipid;Chromosome 14 open reading frame 2, isoform CRA_b;cDNA, FLJ92381	MP68;C14orf2;PRO1574;hCG_25502	P56378;B2R588	1	3.30608	0.360606	0.66572	0.0226474		P56378
39S ribosomal protein L11, mitochondrial;cDNA FLJ75912, highly similar to Homo sapiens mitochondrial ribosomal protein L11 (MRPL11), transcript variant 1, mRNA;Mitochondrial ribosomal protein L11, isoform CRA_d;Mitochondrial ribosomal protein L11 isoform a variant;Mitochondrial ribosomal protein L11;Mitochondrial ribosomal protein L11, isoform CRA_f;Mitochondrial ribosomal protein L11, isoform CR…	MRPL11;CGI-113;hCG_2017204	Q9Y3B7;A8K219;Q53G19;Q32P46;A6NLT0	1	0.388001	0.369832	0.138492	0.02271		Q9Y3B7
Histone H1x	H1FX	Q92522	1	0.357717	0.226846	0.0716591	0.0227106		Q92522
Transmembrane 9 superfamily member 4;Transmembrane 9 superfamily protein member 4;Transmembrane 9 superfamily protein member 4, isoform CRA_c;cDNA FLJ54092, highly similar to Transmembrane 9 superfamily protein member 4;cDNA, FLJ79192, highly similar to Transmembrane 9 superfamily protein member 4;cDNA FLJ53349, highly similar to Transmembrane 9 superfamily protein member 4;cDNA FLJ44570 fis, clo…	TM9SF4;KIAA0255;RP5-836N17.2-002;hCG_38809	Q92544-1;Q92544;B0QYT7;Q92544-2;B4DH88;B4DKC1;Q6ZTK5	1	0.0709237	0.376474	0.122843	0.0227221		Q92544
Protein transport protein Sec24C;SEC24-related protein C;cDNA FLJ60345, highly similar to Protein transport protein Sec24C;cDNA FLJ60379, highly similar to Protein transport protein Sec24C	SEC24C;KIAA0079	P53992;B4DSN3;B4DZT4	1	0.245086	0.251286	0.218312	0.0228258		P53992
Ubiquitin carrier protein;SUMO-conjugating enzyme UBC9;SUMO-protein ligase;Ubiquitin-conjugating enzyme E2 I;Ubiquitin-protein ligase I;Ubiquitin carrier protein I;Ubiquitin carrier protein 9;p18	UBE2I;LA16c-358B7.1-006;hCG_42687;UBC9;UBCE9	B0QYN7;Q7KZS0;P63279;A8K503	1	0.16375	0.241029	0.0968892	0.022833		B0QYN7
RELA protein;Transcription factor p65;Nuclear factor NF-kappa-B p65 subunit;cDNA FLJ57698, highly similar to Transcription factor p65	RELA;NFKB3	Q2TAM5;Q96CP1;Q96F54;Q04206-1;Q04206;B4E082;Q04206-4;Q04206-3;Q04206-2	1	0	0.383969	0	0.0228973		Q2TAM5
Gamma-sarcoglycan;35 kDa dystrophin-associated glycoprotein;cDNA FLJ75652, highly similar to Homo sapiens sarcoglycan, gamma (35kDa dystrophin-associated glycoprotein) (SGCG), mRNA;cDNA, FLJ94485, highly similar to Homo sapiens sarcoglycan, gamma (35kDa dystrophin-associated glycoprotein) (SGCG), mRNA;Sarcoglycan, gamma (35kDa dystrophin-associated glycoprotein)	SGCG;RP11-40O20.1-001	Q13326;A8K3K5;B2RE70;Q5T9J6	1	2.88699	0.559317	0.21847	0.022922		Q13326
Protein transport protein Sec24D;SEC24-related protein D;Putative uncharacterized protein SEC24D;cDNA FLJ78676, highly similar to Homo sapiens SEC24 related gene family, member D (SEC24D), mRNA;cDNA FLJ10528 fis, clone NT2RP2000943, highly similar to Protein transport protein Sec24D;cDNA FLJ43974 fis, clone TESTI4018101, highly similar to Protein transport protein Sec24D;SEC24D protein	SEC24D;KIAA0755	O94855-2;O94855;Q4W5D3;O94855-1;A8K6V0;B3KM89;B3KWV9;Q49AI3	1	0.105586	0.52597	0.182881	0.0229907		O94855
ATP synthase subunit g, mitochondrial;cDNA FLJ76372, highly similar to Homo sapiens ATP synthase, H+ transporting, mitochondrial F0 complex, subunit G, mRNA;HCG2043599, isoform CRA_b	ATP5L;hCG_2043599	O75964;A8K0K3	1	2.32259	0.213043	0.667975	0.0230096		O75964
Zinc-alpha-2-glycoprotein;Zn-alpha-2-glycoprotein	AZGP1;ZAG;ZNGP1	P25311	1	3.07712	0.188409	0.939178	0.0230882		P25311
Integrin alpha-1;Laminin and collagen receptor;VLA-1;CD49 antigen-like family member A;cDNA FLJ61587, highly similar to Integrin alpha-1	ITGA1	P56199;B2RNU0;B4DTY8	1	0	0.385728	0	0.0230932		P56199
Dynein light chain Tctex-type 1;T-complex testis-specific protein 1 homolog;Protein CW-1;Dynein, light chain, Tctex-type 1;Tctex-1;Dynein, light chain, Tctex-type 1, isoform CRA_c;cDNA, FLJ96681, Homo sapiens t-complex-associated-testis-expressed 1-like 1(TCTEL1), mRNA;Dynein, light chain, Tctex-type 1, isoform CRA_a	DYNLT1;TCTEL1;TCTEX-1;TCTEX1;RP11-114M11.1-001;hCG_16821;RP11-114M11.1-003	P63172;Q5VTU4;Q5VTU3	1	0.100892	0.467548	0.17475	0.0230972		P63172
Protein COQ10 A, mitochondrial;COQ10A protein	COQ10A;UNQ6192/PRO20219	Q96MF6-1;Q96MF6;Q96MF6-2;Q8TAL2	1	13.8619	1.73205	3.79955	0.0231223		Q96MF6
Putative uncharacterized protein DKFZp686M24262;Acyl-Coenzyme A dehydrogenase, C-4 to C-12 straight chain;Acyl-Coenzyme A dehydrogenase, C-4 to C-12 straight chain, isoform CRA_a;Medium-chain specific acyl-CoA dehydrogenase, mitochondrial;cDNA FLJ52595, highly similar to Medium-chain specific acyl-CoA dehydrogenase, mitochondrial (EC 1.3.99.3);cDNA FLJ50422, highly similar to Medium-chain specifi…	DKFZp686M24262;ACADM;RP4-682C21.1-002;hCG_22915;RP4-682C21.1-001	Q5HYG7;Q5T4U5;P11310;B4DJE7;B4DVB1;B4DVE0;B4DWX6;Q5T4U4	1	3.19634	0.0765582	0.88338	0.0231245		Q5HYG7
Coatomer subunit alpha;Alpha-coat protein;HEP-COP;Xenin;Xenopsin-related peptide;Proxenin	COPA	P53621-2;P53621;P53621-1	1	0.200168	0.257442	0.060059	0.0231378		P53621
Very long-chain specific acyl-CoA dehydrogenase, mitochondrial;cDNA FLJ56425, highly similar to Very-long-chain specific acyl-CoAdehydrogenase, mitochondrial (EC 1.3.99.-);cDNA FLJ55801, highly similar to Very-long-chain specific acyl-CoAdehydrogenase, mitochondrial (EC 1.3.99.-);Acyl-Coenzyme A dehydrogenase, very long chain variant;cDNA FLJ31521 fis, clone NT2RI2000255, highly similar to Very-l…	ACADVL;VLCAD;hCG_42007	P49748-1;P49748;B4DEA8;B4DEB6;Q53HR2;P49748-2;B3KPA6;B3KPX1	1	4.26807	0.117473	1.25528	0.0231553		P49748
Kinesin light chain 1;Kinesin light chain 1J;Kinesin light chain 1M;Kinesin light chain 1N;Kinesin light chain 1K;Kinesin light chain 1E;Kinesin light chain 1D;Kinesin light chain 1O;cDNA FLJ61233, highly similar to Kinesin light chain 1;cDNA FLJ55519, highly similar to Kinesin light chain 1;Kinesin light chain 1F;Kinesin light chain 1A;Medulloblastoma antigen MU-MB-2.50	KLC1;KLC;KNS2	Q07866-6;Q07866;Q07866-9;Q7RTP8;Q7RTQ4;Q07866-4;Q7RTQ0;Q07866-5;Q7RTQ1;Q7RTQ2;Q7RTQ3;Q7RTQ8;Q07866-7;Q07866-1;A6NF62;B5BU63;Q07866-3;Q07866-8;Q07866-2;B4DGB3;B4DS14;Q7RTQ7;Q7RTQ9;Q7Z5D5	1	0.380098	0.176892	0.102849	0.023168		Q07866
Leucine-rich repeat-containing protein 57	LRRC57	Q8N9N7	1	0.0657019	0.293676	0.113799	0.0231702		Q8N9N7
DNA replication licensing factor MCM2;Minichromosome maintenance protein 2 homolog;Nuclear protein BM28;cDNA FLJ46429 fis, clone THYMU3014372, highly similar to DNA replication licensing factor MCM2;cDNA FLJ55651, highly similar to DNA replication licensing factor MCM2;MCM2 protein	MCM2;BM28;CCNL1;CDCL1;KIAA0030	P49736;B3KXZ4;B4DSV5;Q9BWF4	1	0	0.386903	0	0.0232245		P49736
T-complex protein 1 subunit zeta;CCT-zeta;CCT-zeta-1;Tcp20;HTR3;Acute morphine dependence-related protein 2;Chaperonin subunit 6A;cDNA, FLJ94440, highly similar to Homo sapiens chaperonin containing TCP1, subunit 6A (zeta 1)(CCT6A), mRNA;cDNA FLJ52344, highly similar to T-complex protein 1 subunit zeta;cDNA, FLJ79129, highly similar to T-complex protein 1 subunit zeta;Chaperonin containing TCP1, …	CCT6A;CCT6;CCTZ	P40227;A1JUI8;B2R9K8;B4DPJ8;Q59ET3;A6NCD2;B4DN39	1	0.29187	0.223082	0.0847632	0.023268		P40227
Cullin-associated NEDD8-dissociated protein 1;Cullin-associated and neddylation-dissociated protein 1;p120 CAND1;TBP-interacting protein TIP120A;TBP-interacting protein of 120 kDa A;cDNA FLJ77762, highly similar to Homo sapiens cullin-associated and neddylation-dissociated 1 (CAND1), mRNA;Cullin-associated and neddylation-dissociated 1, isoform CRA_b;cDNA, FLJ95126, Homo sapiens TBP-interacting p…	CAND1;KIAA0829;TIP120;TIP120A;hCG_16584	Q86VP6-1;Q86VP6;A8K8U1;B2RAU3;B3KM30;B3KMG3;Q86VP6-2	1	0.347012	0.174106	0.130633	0.0232782		Q86VP6
Splicing factor 3A subunit 2;Spliceosome-associated protein 62;SF3a66;Splicing factor 3a, subunit 2, 66kDa, isoform CRA_a;cDNA, FLJ95692, Homo sapiens splicing factor 3a, subunit 2, 66kDa (SF3A2), mRNA;SF3A2 protein	SF3A2;SAP62;hCG_2005314	Q15428;B2RBU1;Q05DF2	1	0	0.387787	0	0.0233234		Q15428
Heterogeneous nuclear ribonucleoprotein A3;HNRPA3 protein;BX1;cDNA FLJ52659, highly similar to Heterogeneous nuclear ribonucleoprotein A3;cDNA, FLJ79333, highly similar to Heterogeneous nuclear ribonucleoprotein A3;Heterogeneous nuclear ribonucleoprotein A3, isoform CRA_a;cDNA FLJ58832, highly similar to Heterogeneous nuclear ribonucleoprotein A3	HNRNPA3;HNRPA3;hCG_2005824	P51991-1;P51991;Q66K53;Q8NFG3;P51991-2;B4DDB6;B4E3E6	1	0.119846	0.393624	0.0562923	0.0233462		P51991
H/ACA ribonucleoprotein complex subunit 2;snoRNP protein NHP2;Nucleolar protein family A member 2;NHP2-like protein;Putative uncharacterized protein NHP2	NHP2;NOLA2;HSPC286	Q9NX24;B5MCG8;Q96P96;A6NKY8	1	0	0.388092	0	0.0233576		Q9NX24
Cullin-3;cDNA FLJ76286, highly similar to Homo sapiens cullin 3 (CUL3), mRNA;Cullin 3, isoform CRA_a;Putative uncharacterized protein CUL3	CUL3;KIAA0617;hCG_21435	Q13618-1;Q13618;A8K536;Q53S54;Q13618-2;Q13618-3;Q53RD1	1	0.293069	0.339536	0.075	0.0233707		Q13618
14-3-3 protein eta;Protein AS1;cDNA, FLJ93036, highly similar to Homo sapiens tyrosine 3-monooxygenase/tryptophan 5-monooxygenaseactivation protein, eta polypeptide (YWHAH), mRNA;Homo sapiens clone CDABP0046 mRNA sequence;Tyrosine 3-monooxygenase/tryptophan 5-monooxygenase activation protein, eta polypeptide	YWHAH;YWHA1;LL22NC03-44A4.1-004	Q04917;B2R6N6;Q9H4N8;A2IDB2	1	0.269695	0.24313	0.166471	0.0234368		Q04917
NADH dehydrogenase [ubiquinone] iron-sulfur protein 8, mitochondrial;NADH-ubiquinone oxidoreductase 23 kDa subunit;Complex I-23kD;TYKY subunit;NDUFS8 protein;NADH dehydrogenase (Ubiquinone) Fe-S protein 8, 23kDa (NADH-coenzyme Q reductase) variant;cDNA FLJ57061, highly similar to NADH-ubiquinone oxidoreductase 23 kDa subunit, mitochondrial (EC 1.6.5.3)	NDUFS8	O00217;Q08E91;Q53G17;B4DYI3	1	3.86201	0.287088	1.19968	0.0234579		O00217
Putative pre-mRNA-splicing factor ATP-dependent RNA helicase DHX15;DEAH box protein 15;ATP-dependent RNA helicase #46;cDNA FLJ55635, highly similar to pre-mRNA-splicing factorATP-dependent RNA helicase DHX15 (EC 3.6.1.-)	DHX15;DBP1;DDX15	O43143;B4E0S6	1	0.109947	0.396972	0.0526335	0.0236064		O43143
Putative uncharacterized protein RPL30;60S ribosomal protein L30;Ribosomal protein L30, isoform CRA_b;cDNA, FLJ92384, Homo sapiens ribosomal protein L30 (RPL30), mRNA	RPL30;hCG_18222	A8MYX5;P62888;B2R591	1	0.174735	0.305377	0.0729901	0.0236495		A8MYX5
Arginyl-tRNA synthetase, cytoplasmic;Arginine--tRNA ligase;cDNA, FLJ95667, highly similar to Homo sapiens arginyl-tRNA synthetase (RARS), mRNA;cDNA FLJ50285, highly similar to Arginyl-tRNA synthetase (EC 6.1.1.19);Arginyl-tRNA synthetase variant	RARS	P54136-1;P54136;B2RBS9;B4DXW6;Q53GY4;P54136-2	1	0.296476	0.216105	0.156165	0.0236609		P54136
Complement component C4B (Childo blood group);Complement component C4B (Childo blood group) 2;C4A;C4A91;C4B1;Complement component 4B (Childo blood group);cDNA FLJ55146, highly similar to Complement C4-B;C4A protein;ZA protein;Complement component 4A (Rodgers blood group);Putative uncharacterized protein C4A;C4A3;cDNA FLJ60561, highly similar to Complement C4-B;C4A variant protein;C4B2;C4B5;C4A4;C…	C4B-1;C4B-2;DASS-307J8.2-001;DASS-307J8.7-001;C4A;C4B;DADB-112B14.11-001;DAMC-258G8.6-001;DAQB-124C11.1-001;XXbac-BPG116M5.10-001;C4A variant protein;DADB-112B14.9-001;CO4;CPAMD2;CPAMD3	A2BHY4;Q6U2F8;Q6U2G0;Q6U2G1;B0UZ85;B4DDH0;Q96EG2;Q9UM89;B0V2C8;Q5JNX2;Q6U2F6;A6H8M8;A7E2V2;B0QZR6;B2RUT6;B4DIE5;Q4LE82;Q6P4R1;Q6U2E0;Q6U2E5;Q6U2E7;Q6U2F0;Q6U2F3;Q6U2F4;Q6U2I5;Q6U2K2;Q6U2L9;Q6XMI6;Q9UMV1;B0UZ83;Q6U2E8;P0C0L4;P0C0L5	1	3.85234	0.579921	0.736382	0.0237182		A2BHY4
A-kinase anchor protein 2;Protein kinase A-anchoring protein 2;AKAP-KL;A kinase (PRKA) anchor protein 2;cDNA FLJ55665, highly similar to A-kinase anchor protein 2	AKAP2;KIAA0920;PRKA2;RP11-470J20.3-007	B2RTU4;Q9Y2D5-1;Q9Y2D5;B1ALX9;B1ALY1;B3KQ00;B4DTZ2;B4E2K2;Q9Y2D5-2	1	0.370678	0.0247819	0.224595	0.0238673		B2RTU4
Protein NipSnap homolog 2;Glioblastoma-amplified sequence;GBAS protein;Glioblastoma amplified sequence, isoform CRA_b	GBAS;NIPSNAP2;hCG_18231	O75323;Q53X96	1	1.61374	0.232222	0.0168986	0.0238805		O75323
Biliverdin reductase A;Biliverdin-IX alpha-reductase	BLVRA;BLVR;BVR	P53004	1	0.675389	0.252768	0.208991	0.0239401		P53004
NADH dehydrogenase [ubiquinone] 1 beta subcomplex subunit 8, mitochondrial;NADH-ubiquinone oxidoreductase ASHI subunit;Complex I-ASHI;cDNA FLJ76373, highly similar to Homo sapiens NADH dehydrogenase (ubiquinone) 1 beta subcomplex, 8, 19kDa (NDUFB8), mRNA;NADH dehydrogenase (Ubiquinone) 1 beta subcomplex, 8, 19kDa, isoform CRA_b;NADH dehydrogenase (Ubiquinone) 1 beta subcomplex, 8, 19kDa;NADH dehy…	NDUFB8;hCG_24658;RP11-411B6.5-006;RP11-411B6.5-003	O95169;A8K0L4;Q5W145;Q5W143	1	2.68509	0.133918	0.788219	0.023971		O95169
Pantothenate kinase 4;Pantothenic acid kinase 4;cDNA FLJ56439, highly similar to Pantothenate kinase 4 (EC 2.7.1.33);Pantothenate kinase 4 putative variant;Pantothenate kinase 4, isoform CRA_b	PANK4;hCG_24601	Q9NVE7;B4DHW9;Q7RTX2	1	0.331064	0.137099	0.136403	0.0240373		Q9NVE7
Heat shock protein 105 kDa;Heat shock 110 kDa protein;Antigen NY-CO-25;cDNA FLJ55325, highly similar to Heat-shock protein 105 kDa;cDNA FLJ52364, highly similar to Heat-shock protein 105 kDa;Heat shock 105kDa/110kDa protein 1, isoform CRA_b;cDNA FLJ51707, highly similar to Heat-shock protein 105 kDa	HSPH1;HSP105;HSP110;KIAA0201;hCG_32198	Q92598-2;Q92598;Q92598-1;B4DF68;B4DYH1;Q92598-3;B4DZB4	1	0.352039	0.119319	0.161396	0.0240754		Q92598
Peroxiredoxin-4;Prx-IV;Thioredoxin peroxidase AO372;Thioredoxin-dependent peroxide reductase A0372;Antioxidant enzyme AOE372	PRDX4	Q13162	1	0.240134	0.299506	0.0257095	0.0241271		Q13162
Phospholipase C, gamma 1;Phospholipase C, gamma 1, isoform CRA_b;cDNA FLJ60301, highly similar to 1-phosphatidylinositol-4,5-bisphosphate phosphodiesterase gamma 1 (EC 3.1.4.11);PLCG1 variant protein;1-phosphatidylinositol-4,5-bisphosphate phosphodiesterase gamma-1;Phosphoinositide phospholipase C;Phospholipase C-gamma-1;PLC-II;PLC-148;Phosphplipase C-gamma 1	PLCG1;RP3-511B24.2-013;hCG_2018597;PLCG1 variant protein;PLC1	A2A284;B4DMA3;Q4LE43;P19174;Q6LC80	1	0	0.395809	0	0.0242286		A2A284
Nuclear mitotic apparatus protein 1;SP-H antigen;cDNA FLJ76708, highly similar to Homo sapiens nuclear mitotic apparatus protein 1 (NUMA1), mRNA;NUMA1 protein;Nuclear mitotic apparatus protein 1 variant;Putative uncharacterized protein;Nuclear mitotic apparatus protein;NUMA1 variant protein	NUMA1;NUMA;NuMA;NUMA1 variant protein	Q14980-2;Q14980;A8K394;Q3SYK8;Q59HB8;Q7Z757;Q96HN5;Q9UPG3;Q14980-1;Q9UNL7;Q4LE64	1	0.233688	0.188355	0.119607	0.024258		Q14980
Nucleoside diphosphate kinase;Nucleoside diphosphate kinase B;nm23-H2;C-myc purine-binding transcription factor PUF;Putative nucleoside diphosphate kinase	NME1-NME2;hCG_2001850;NME2;NM23B;NME2P1	Q32Q12;Q1WM23;P22392;Q6FHN3;O60361	1	0.332455	0.156188	0.121455	0.0243929		Q32Q12
cDNA, FLJ95068, highly similar to Homo sapiens eukaryotic translation elongation factor 1 delta (guanine nucleotide exchange protein) (EEF1D), transcript variant 1, mRNA;FP1047;EEF1D protein;Eukaryotic translation elongation factor 1 delta (Guanine nucleotide exchange protein);Eukaryotic translation elongation factor 1 delta (Guanine nucleotide exchange protein), isoform CRA_b;cDNA: FLJ20897 fis,…	EEF1D;hCG_1994718;EF1D	B2RAR6;Q71RH4;Q96I38;Q9BW34;Q9H7G6;P29692;B4DDU4	1	0.343785	0.284455	0.0250673	0.0244001		B2RAR6
26S proteasome non-ATPase regulatory subunit 3;Proteasome subunit p58;cDNA FLJ12834 fis, clone NT2RP2003158, highly similar to 26S proteasome non-ATPase regulatory subunit 3;Proteasome (Prosome, macropain) 26S subunit, non-ATPase, 3;cDNA FLJ30049 fis, clone ADRGL1000033, highly similar to 26S proteasome non-ATPase regulatory subunit 3;cDNA FLJ56054, highly similar to 26S proteasome non-ATPase reg…	PSMD3;hCG_30012	O43242;B3KMW9;B3KNN7;B4DEB0;B4DPM7;B4DT72;B4DV84;Q6IBN0;Q8N9M2;Q96N86	1	0.349354	0.246095	0.0395285	0.0244903		O43242
Basement membrane-specific heparan sulfate proteoglycan core protein;Perlecan;Perlecan proteoglycan 2;HSPG2 protein;Basement membrane-specific heparan sulfate proteoglycan core protein variant	HSPG2	P98160;B6EU51;Q2VPA1;Q59EG0	1	0.803954	0.112825	0.129859	0.0245143		P98160
Receptor tyrosine-protein kinase erbB-2;p185erbB2;C-erbB-2;NEU proto-oncogene;Tyrosine kinase-type cell surface receptor HER2;MLN 19;V-erb-b2 erythroblastic leukemia viral oncogene homolog 2, neuro/glioblastoma derived oncogene homolog (Avian);V-erb-b2 erythroblastic leukemia viral oncogene homolog 2, neuro/glioblastoma derived oncogene homolog (Avian), isoform CRA_c;cDNA FLJ59518, highly similar…	ERBB2;HER2;NEU;NGL;hCG_28177	P04626;B2RZG3;B4DHN3;B4DLA2;B4DTR1;Q4H1F1;Q4H1F2;Q9NP09	1	0	0.398444	0	0.0245288		P04626
Prostaglandin D2 synthase 21kDa (Brain);Prostaglandin-H2 D-isomerase;Lipocalin-type prostaglandin-D synthase;Glutathione-independent PGD synthetase;Prostaglandin-D2 synthase;PGDS2;Beta-trace protein;Cerebrin-28;cDNA PSEC0009 fis, clone NT2RM1000731, highly similar to Prostaglandin-H2 D-isomerase (EC 5.3.99.2);Prostaglandin D2 synthase 21kDa (Brain), isoform CRA_a;cDNA, FLJ93254, Homo sapiens pros…	PTGDS;RP11-229P13.6-003;RP11-229P13.6-005;PDS;hCG_1780827;RP11-229P13.6-004	Q5SQ11;Q5SQ09;P41222;B2R727;Q5SQ12	1	4.95515	0.468882	1.70623	0.0245463		Q5SQ11
Metaxin-2;Mitochondrial outer membrane import complex protein 2;cDNA FLJ10425 fis, clone NT2RP1000326, highly similar to Metaxin-2;cDNA FLJ51595, highly similar to Metaxin-2;Metaxin 2;Metaxin 2, isoform CRA_c	MTX2;hCG_1778458	O75431;B3KM74;Q8IZ68	1	1.44431	0.349906	0.185613	0.0245555		O75431
DnaJ homolog subfamily B member 6;Heat shock protein J2;MSJ-1;HHDJ1;MRJ	DNAJB6;HSJ2;MRJ;MSJ1	O75190-3;O75190	1	0.599877	0.567135	0.528802	0.0246706		O75190
Frataxin, mitochondrial;Friedreich ataxia protein;Frataxin intermediate form;Frataxin(56-210);Frataxin(81-210);Putative uncharacterized protein FXN	FXN;FRDA;X25	Q16595-1;Q16595;A8MXJ6;Q16595-2	1	2.72777	0.102598	0.60563	0.0246714		Q16595
Transcription elongation factor B polypeptide 2;RNA polymerase II transcription factor SIII subunit B;SIII p18;Elongin B;Elongin 18 kDa subunit	TCEB2	Q15370	1	0.119139	0.453477	0.113211	0.02469		Q15370
Heat shock protein HSP 90-beta;HSP 84;cDNA FLJ77842;Heat shock protein 90kDa alpha (Cytosolic), class B member 1, isoform CRA_a;cDNA, FLJ92550, Homo sapiens heat shock 90kDa protein 1, beta (HSPCB), mRNA;cDNA FLJ53619, highly similar to Heat shock protein HSP 90-beta;cDNA FLJ54023, highly similar to Heat shock protein HSP 90-beta;HSP90AB1 protein;cDNA: FLJ21717 fis, clone COL10322;Putative heat s…	HSP90AB1;HSP90B;HSPC2;HSPCB;hCG_19001;HSP90AB3P;HSP90BC	P08238;A8K3W9;B2R5P0;B4DGL0;B4DMA2;Q6PK50;Q9H6X9;Q58FF7	1	0.378046	0.242354	0.0309096	0.0247226		P08238
Myosin regulatory light chain 2, atrial isoform;Myosin regulatory light chain 7	MYL7;MYLC2A	Q01449	1	0.113449	0.249624	0.122221	0.0248788		Q01449
Solute carrier family 2, facilitated glucose transporter member 1;Glucose transporter type 1, erythrocyte/brain;HepG2 glucose transporter;cDNA FLJ77473, highly similar to Homo sapiens solute carrier family 2 (facilitated glucose transporter), member 1 (SLC2A1), mRNA;cDNA FLJ16785 fis, clone NT2RI2015342, highly similar to Solute carrier family 2, facilitated glucose transporter member 1;cDNA FLJ6…	SLC2A1;GLUT1	P11166;A8K9S6;B3KVN0;B4DDR6;Q0P512;Q59GX2;A8MWM7;B4DKW1	1	0	0.401771	0	0.0249099		P11166
Ran-specific GTPase-activating protein;Ran-binding protein 1;RAN binding protein 1 variant;RAN binding protein 1, isoform CRA_f;cDNA FLJ40340 fis, clone TESTI2032681, moderately similar to RAN-SPECIFIC GTPASE-ACTIVATING PROTEIN;cDNA FLJ57507, highly similar to Ran-specific GTPase-activating protein	RANBP1;hCG_17886	P43487;Q53EY3;B3KUP2;B4DE76	1	0	0.40243	0	0.0249857		P43487
PDZ and LIM domain protein 5;Enigma homolog;Enigma-like PDZ and LIM domains protein;Putative uncharacterized protein LIM;PRO2489	PDLIM5;ENH;L9;LIM	Q96HC4;Q4W5K9;Q9P1D1;Q59FC9	1	1.36208	0.41284	0.365064	0.0250009		Q96HC4
cDNA FLJ76855, highly similar to Homo sapiens exportin 7 (XPO7), mRNA;Exportin-7;Ran-binding protein 16;cDNA FLJ56596, highly similar to Exportin-7	XPO7;KIAA0745;RANBP16	A8K607;Q9UIA9;B4DSP8	1	0.203512	0.165847	0.352493	0.0250024		A8K607
Olfactomedin-like protein 3;HNOEL-iso;cDNA FLJ58142, highly similar to Olfactomedin-like protein 3	OLFML3;PSEC0035;PSEC0173;PSEC0244;UNQ663/PRO1294	Q9NRN5-1;Q9NRN5;Q9NRN5-2;B4DNG0	1	0.195179	0.629381	0.33806	0.0250444		Q9NRN5
Adenylyl cyclase-associated protein 2;Adenylyl cyclase-associated protein	CAP2;hCG_37307;RP11-14H3.2-001;DKFZp686D0714	P40123;B2R5Y3;Q9BYW9;Q5JPJ8	1	0.254152	0.239516	0.142901	0.025083		P40123
Rho-associated protein kinase 2;Rho-associated, coiled-coil-containing protein kinase 2;p164 ROCK-2;Rho kinase 2;Putative uncharacterized protein ROCK2;cDNA FLJ51533, highly similar to Rho-associated protein kinase 2 (EC 2.7.11.1);ROCK2 protein	ROCK2;KIAA0619	O75116;Q53SJ7;B4DRJ9;Q14DU5	1	0	0.403918	0	0.025157		O75116
Dynein light chain 1, cytoplasmic;Dynein light chain LC8-type 1;8 kDa dynein light chain;DLC8;Protein inhibitor of neuronal nitric oxide synthase;Dynein, light chain, LC8-type 1;DNCL1 protein;Dynein, light chain, LC8-type 1, isoform CRA_a;cDNA, FLJ92051, Homo sapiens dynein, cytoplasmic, light polypeptide 1 (DNCL1),mRNA	DYNLL1;DLC1;DNCL1;DNCLC1;HDLC1;hCG_27767	P63167;Q6FGH9	1	0.747368	0.213373	0.275189	0.0252253		P63167
ATP2B4 protein;cDNA FLJ78761, highly similar to Homo sapiens ATPase, Ca++ transporting, plasma membrane 4 (ATP2B4), transcript variant 1, mRNA;Plasma membrane calcium-transporting ATPase 4;Plasma membrane calcium ATPase isoform 4;Plasma membrane calcium pump isoform 4;Matrix-remodeling-associated protein 1;ATPase, Ca++ transporting, plasma membrane 4;ATPase, Ca++ transporting, plasma membrane 4, …	ATP2B4;ATP2B2;MXRA1;RP11-397P13.1-002;hCG_18445;RP11-397P13.1-001;DKFZp686M088;DKFZp686K08109	A7E2D8;A8K8U3;P23634-2;P23634;B1APW5;P23634-3;P23634-4;A1X4Q2;P23634-5;P23634-1;P23634-8;P23634-6;A1X4Q1;B1APW6;Q68DH9;Q7Z3S1;P23634-7	1	0.503226	0.0966949	0.157737	0.025441		A7E2D8
STE20/SPS1-related proline-alanine-rich protein kinase;Serine/threonine-protein kinase 39;DCHT;Putative uncharacterized protein STK39;Small intestine SPAK-like kinase	STK39;SPAK	Q9UEW8;Q53S90;Q53SL7;Q53SS1;Q6E0B2	1	0	0.406488	0	0.0254541		Q9UEW8
Rho GTPase-activating protein 1;Rho-type GTPase-activating protein 1;Rho-related small GTPase protein activator;GTPase-activating protein rhoOGAP;p50-RhoGAP;CDC42 GTPase-activating protein;cDNA FLJ60782, highly similar to Rho-GTPase-activating protein 1	ARHGAP1;CDC42GAP;RHOGAP1	Q07960;B4DPZ4	1	0.322065	0.223901	0.279095	0.0254642		Q07960
Alpha-1-antichymotrypsin;Cell growth-inhibiting gene 24/25 protein;Alpha-1-antichymotrypsin His-Pro-less;cDNA FLJ35730 fis, clone TESTI2003131, highly similar to ALPHA-1-ANTICHYMOTRYPSIN	SERPINA3;AACT;GIG24;GIG25	P01011-2;P01011;B3KS79;P01011-1	1	6.30702	0.428746	2.03687	0.0255419		P01011
GMP synthase [glutamine-hydrolyzing];Glutamine amidotransferase;GMP synthetase;cDNA FLJ75406, highly similar to Homo sapiens guanine monphosphate synthetase (GMPS), mRNA;Guanine monphosphate synthetase, isoform CRA_b;cDNA, FLJ79481, highly similar to GMP synthase (glutamine-hydrolyzing) (EC6.3.5.2);cDNA FLJ57604, highly similar to GMP synthase (glutamine-hydrolyzing) (EC 6.3.5.2);cDNA FLJ57661, h…	GMPS;hCG_1811302	P49915;A8K639;B4DUT7;B4DXV7;Q53F90	1	0	0.407746	0	0.0256001		P49915
Ras-related C3 botulinum toxin substrate 1;p21-Rac1;Ras-like protein TC25;Cell migration-inducing gene 5 protein;cDNA FLJ77333, highly similar to Homo sapiens ras-related C3 botulinum toxin substrate 1 (rho family, small GTP binding protein Rac1) (RAC1), transcript variant Rac1b, mRNA;Ras-related C3 botulinum toxin substrate 1 (Rho family, small GTP binding protein Rac1);Ras-related C3 botulinum …	RAC1;MIG5;hCG_14926;tcag7.839;RAC3	P63000-2;P63000;A4D2P0;P63000-1;A4D2P1;A4D2P2;P60763	1	0.251344	0.340996	0.226012	0.0256109		P63000
Polypeptide N-acetylgalactosaminyltransferase 2;Polypeptide GalNAc transferase 2;Protein-UDP acetylgalactosaminyltransferase 2;UDP-GalNAc:polypeptide N-acetylgalactosaminyltransferase 2;Polypeptide N-acetylgalactosaminyltransferase 2 soluble form	GALNT2	Q10471;A8K1Y3	1	0	0.408459	0	0.0256829		Q10471
Exocyst complex component 4;Exocyst complex component Sec8;Exocyst complex component 4, isoform CRA_a;Putative uncharacterized protein DKFZp451H153;SEC8-like 1 (S. cerevisiae);EXOC4 protein	EXOC4;KIAA1699;SEC8;SEC8L1;DKFZp451H153;hCG_1811079;tcag7.1185	Q96A65;Q541U8;Q6NX51;Q6PJ82;Q8TAR2	1	0	0.409013	0	0.0257472		Q96A65
Myeloid-associated differentiation marker;SB135;HCG1640809, isoform CRA_b;cDNA, FLJ93079;cDNA FLJ53753, highly similar to Myeloid-associated differentiation marker	MYADM;UNQ553/PRO1110;hCG_1640809	Q96S97;B2RE58;B4DG42	1	0.233612	0.228468	0.149816	0.0257547		Q96S97
TIP41-like protein;Putative MAPK-activating protein PM10	TIPRL	O75663-1;O75663;O75663-2	1	0.211007	0.315664	0.365475	0.0257671		O75663
Proteasome subunit alpha type-2;Proteasome component C3;Macropain subunit C3;Multicatalytic endopeptidase complex subunit C3;Proteasome subunit alpha type;Putative uncharacterized protein DKFZp686D09174;Proteasome (Prosome, macropain) subunit, alpha type, 2, isoform CRA_a	PSMA2;PSC3;DKFZp686D09174;hCG_19883	P25787;Q53GF5;Q6MZI6	1	0.422729	0.311678	0.369208	0.025773		P25787
BAG family molecular chaperone regulator 3;Bcl-2-associated athanogene 3;Bcl-2-binding protein Bis;Docking protein CAIR-1;BCL2-associated athanogene 3 variant	BAG3;BIS	O95817;Q53GY1	1	0.713246	0.0514826	0.116738	0.0257904		O95817
40S ribosomal protein S24	RPS24;RP11-6P10.1-001;hCG_22610;DKFZp686N1586;RP11-6P10.1-003	P62847-1;P62847;Q5T0P7;Q7Z3D1;P62847-2;Q5T0P8	1	0	0.409898	0	0.0258503		P62847
RING finger protein 214;cDNA FLJ54868, weakly similar to Ubiquitin ligase protein DZIP3 (EC 6.3.2.-);Putative uncharacterized protein DKFZp547C195;Ring finger protein 214;cDNA FLJ58281	RNF214;DKFZp547C195;hCG_38328	Q8ND24;B2RUW0;B4DTD1	1	0	0.4099	0	0.0258505		Q8ND24
Small muscular protein;Stretch-responsive skeletal muscle protein	SMPX;SRMX	Q9UHP9;B1AWX2	1	0.571922	0.118661	0.0640944	0.0259073		Q9UHP9
cDNA FLJ39696 fis, clone SMINT2011033, highly similar to Sorting and assembly machinery component 50 homolog		B3KUE6	1	0.19929	0.138773	0.34518	0.025924		B3KUE6
Macrophage migration inhibitory factor;Phenylpyruvate tautomerase;L-dopachrome tautomerase;L-dopachrome isomerase;Glycosylation-inhibiting factor	MIF;GLIF;MMIF	P14174;A5Z1R8;A6MUU8;B2R4S3;Q6FHV0	1	0.352296	0.324879	0.0999526	0.025934		P14174
Tripartite motif-containing protein 54;Muscle-specific RING finger protein 3;Muscle-specific RING finger protein;RING finger protein 30	TRIM54;MURF;MURF3;RNF30	Q9BYV2-2;Q9BYV2;Q9BYV2-1	1	0.311664	0.0235499	0.273456	0.0259678		Q9BYV2
Cytoplasmic aconitate hydratase;Citrate hydro-lyase;Iron-responsive element-binding protein 1;Iron regulatory protein 1;Ferritin repressor protein;Aconitase 1, soluble;Aconitase 1, soluble, isoform CRA_a;Aconitase 1 variant	ACO1;IREB1;RP11-334P12.1-001;hCG_30165;IRP1;RP11-334P12.1-003	P21399;Q5VZA7;Q9HBB2;Q59FI0;Q5VZA6	1	1.50138	0.28938	0.308982	0.0259719		P21399
[Pyruvate dehydrogenase [lipoamide]] kinase isozyme 1, mitochondrial;Pyruvate dehydrogenase kinase isoform 1;Pyruvate dehydrogenase kinase, isozyme 1, isoform CRA_a;cDNA, FLJ93099, Homo sapiens pyruvate dehydrogenase kinase, isoenzyme 1 (PDK1), nuclear gene encoding mitochondrial protein, mRNA;Putative uncharacterized protein PDK1;Mitochondrial pyruvate dehydrogenase kinase isoenzyme 1	PDK1;hCG_15722	Q15118;B2R6T1;Q53R49;Q308M4	1	0.460349	0.32034	0.134577	0.0259735		Q15118
Lupus La protein;Sjoegren syndrome type B antigen;La ribonucleoprotein;La autoantigen;Autoantigen La;La 4.1 protein;Ribonucleoprotein (La);Sjogren syndrome antigen B (Autoantigen La);Putative uncharacterized protein SSB;Sjogren syndrome antigen B (Autoantigen La), isoform CRA_c;SS-B/La protein	SSB;hCG_2005701	P05455;B5BUB5;Q14730;Q15367;Q53XJ4;Q9UMH5;Q9UMH6	1	0.121153	0.359771	0.107968	0.0259879		P05455
Serpin H1;Collagen-binding protein;47 kDa heat shock protein;Rheumatoid arthritis-related antigen RA-A47;Arsenic-transactivated protein 3;Cell proliferation-inducing gene 14 protein;cDNA FLJ78501, highly similar to Homo sapiens serpin peptidase inhibitor, clade H (heat shock protein 47), member 1, (collagen binding protein 1) (SERPINH1), mRNA;cDNA FLJ16630 fis, clone TESTI4019756, highly similar …	SERPINH1;CBP1;CBP2;HSP47;SERPINH2;PIG14;hCG_26462;ra-a47	P50454;A8K259;B3KVJ3;Q9NPA9;B4DN87	1	0.0756658	0.340163	0.0532987	0.0261335		P50454
Androgen-induced protein 1;AIG-1;Androgen-induced 1;Androgen-induced 1 variant;cDNA FLJ61152, highly similar to Androgen-induced protein 1 (AIG-1)	AIG1;CGI-103;RP1-95L4.1-005;RP1-95L4.1-003;RP1-95L4.1-004	Q9NVV5-1;Q9NVV5;Q5T2H2;Q9NVV5-2;Q53HV5;Q9NVV5-3;Q5T2H3;B4DPX2;Q5THU2;Q9NVV5-5	1	1.41855	0.211055	0.2621	0.0261833		Q9NVV5
26S proteasome non-ATPase regulatory subunit 11;26S proteasome regulatory subunit S9;26S proteasome regulatory subunit p44.5;cDNA FLJ76114, highly similar to Homo sapiens proteasome (prosome, macropain) 26S subunit, non-ATPase, 11 (PSMD11), mRNA;Proteasome (Prosome, macropain) 26S subunit, non-ATPase, 11, isoform CRA_a;cDNA FLJ58882, highly similar to 26S proteasome non-ATPase regulatory subunit …	PSMD11;hCG_28139	O00231;A8K3I7;B4DTS5;Q53FT5	1	0.502731	0.163937	0.0413648	0.0261885		O00231
Endonuclease G, mitochondrial	ENDOG	Q14249;Q5T281	1	0.187937	0.164669	0.170718	0.0262135		Q14249
Carbonic anhydrase 2;Carbonic anhydrase II;Carbonate dehydratase II;Carbonic anhydrase C;cDNA, FLJ93439, Homo sapiens carbonic anhydrase II (CA2), mRNA	CA2;hCG_38804;carbonic anhydrase II/ CA II	P00918;B2R7G8;Q6LD99	1	10.3317	0.650043	4.10142	0.0262398		P00918
Guanine nucleotide-binding protein G(I)/G(S)/G(T) subunit beta-2;Transducin beta chain 2;G protein subunit beta-2;cDNA FLJ32188 fis, clone PLACE6002056, highly similar to Guanine nucleotide-binding protein G(I)/G(S)/G(T) subunit beta 2;GNB2 protein;cDNA FLJ77321, highly similar to Homo sapiens guanine nucleotide binding protein (G protein), beta polypeptide 2 (GNB2), mRNA;Guanine nucleotide bindi…	GNB2;hCG_20449	P62879;B3KPU1;Q6FHM2	1	0.424913	0.0526651	0.186977	0.0262819		P62879
COP9 signalosome complex subunit 2;JAB1-containing signalosome subunit 2;Thyroid receptor-interacting protein 15;Alien homolog;COP9 constitutive photomorphogenic homolog subunit 2 variant;cDNA, FLJ93029, highly similar to Homo sapiens COP9 constitutive photomorphogenic homolog subunit 2 (Arabidopsis) (COPS2), mRNA;cDNA FLJ52928, highly similar to COP9 signalosome complex subunit 2	COPS2;CSN2;TRIP15	P61201-2;P61201;Q59EL2;P61201-1;B2R6N0;B4DIH5;Q53HJ0	1	0.1763	0.361664	0.18692	0.0263016		P61201
Selenide, water dikinase 1;Selenophosphate synthetase 1;Selenium donor protein 1;cDNA FLJ57394, highly similar to Selenide, water dikinase 1 (EC 2.7.9.3);cDNA FLJ60186, highly similar to Selenide, water dikinase 1 (EC 2.7.9.3);Selenophosphate synthetase 1, isoform CRA_a	SEPHS1;SELD;SPS;SPS1;RP11-24J20.2-002;hCG_2017606;RP11-24J20.2-003	P49903;B4DLS1;B4DWK0;Q5T5U9;Q5T5U6	1	0	0.414249	0	0.0263592		P49903
Heat shock protein 75 kDa, mitochondrial;Tumor necrosis factor type 1 receptor-associated protein;TNFR-associated protein 1;cDNA FLJ58608, highly similar to Heat shock protein 75 kDa, mitochondrial;TNF receptor-associated protein 1 variant;TNF receptor-associated protein 1;cDNA FLJ33058 fis, clone TRACH1000181, highly similar to Heat shock protein 75 kDa, mitochondrial;cDNA FLJ36025 fis, clone TE…	TRAP1;HSP75	Q12931;B4DR68;Q53FS6;Q53G55;Q59EK6;Q5CAQ4;Q8N9Z3;Q9BV61	1	0.846631	0.111546	0.0804133	0.0267039		Q12931
Grancalcin;Grancalcin, EF-hand calcium binding protein, isoform CRA_a;cDNA, FLJ92668, Homo sapiens grancalcin, EF-hand calcium binding protein (GCA),mRNA	GCA;GCL;hCG_40272	P28676;B2R5X3	1	0	0.417204	0	0.0267068		P28676
Protein XRP2;cDNA, FLJ92928, highly similar to Homo sapiens retinitis pigmentosa 2 (X-linked recessive) (RP2), mRNA	RP2	O75695;B2R6F5	1	0	0.417577	0	0.0267509		O75695
cDNA FLJ34596 fis, clone KIDNE2009191, highly similar to TRANSLIN;Translin, isoform CRA_b;Translin;Translin variant	TSN;hCG_37642	B3KRM8;Q15631;Q53GR3	1	0	0.421371	0	0.0272		B3KRM8
Insulin-like growth factor-binding protein 7;MAC25 protein;Prostacyclin-stimulating factor;PGI2-stimulating factor;IGFBP-rP1;Tumor-derived adhesion factor;cDNA FLJ56737, highly similar to Insulin-like growth factor-binding protein 7	IGFBP7;MAC25;PSF	Q16270;B4E1N2	1	0	0.421527	0	0.0272186		Q16270
40S ribosomal protein S21;Ribosomal protein S21;RPS21 protein;Ribosomal protein S21, isoform CRA_d;Ribosomal protein S21, isoform CRA_e	RPS21;hCG_41768;RP5-908M14.8-003	P63220;Q6FGH5;Q8WVC2;Q9BYK1	1	0.119481	0.373128	0.00211714	0.0272765		P63220
Putative uncharacterized protein CD81;CD81 antigen;26 kDa cell surface protein TAPA-1;Target of the antiproliferative antibody 1;Tetraspanin-28	CD81;TAPA1;TSPAN28	A6NMH8;P60033	1	0.388669	0.189064	0.357287	0.0274149		A6NMH8
Ig kappa chain V-III region HAH;Ig kappa chain V-III region HIC;Myosin-reactive immunoglobulin light chain variable region;HRV Fab N27-VL;HRV Fab N28-VL;Ig kappa chain V-III region SIE;Ig kappa chain V-III region WOL;HRV Fab 026-VL;K light chain variable region;Cold agglutinin FS-2 L-chain;Ig kappa chain V-III region GOL;Rheumatoid factor;Ig kappa chain V-III region Ti;Ig kappa chain V-III region…		P18135;P18136;Q9UL78;A2IPI2;A2IPI3;P01620;P01623;A2IPI5;A2NXP9;A2NB46;P04206;P01622;P01621	1	18.7541	1.73205	8.47125	0.0275846		P18135
Sorting nexin-6;TRAF4-associated factor 2;cDNA FLJ77179, highly similar to Homo sapiens sorting nexin 6 (SNX6) mRNA;cDNA FLJ58001, highly similar to Sorting nexin-6;Sorting nexin 6, isoform CRA_e;MSTP010;cDNA FLJ11394 fis, clone HEMBA1000592, highly similar to Sorting nexin-6	SNX6;hCG_2013610	Q9UNH7;A8K885;B4DJS7;Q5QTQ6	1	0	0.424992	0	0.0276313		Q9UNH7
Ras-related protein Rab-11B;GTP-binding protein YPT3;RAB11B protein;cDNA FLJ61134, highly similar to Ras-related protein Rab-11B;cDNA FLJ51542, highly similar to Ras-related protein Rab-11B;RAB11B, member RAS oncogene family;Ras-related protein Rab-11A;YL8;RAB11A, member RAS oncogene family, isoform CRA_a;cDNA, FLJ92031, Homo sapiens RAB11A, member RAS oncogene family (RAB11A), mRNA;cDNA FLJ61136…	RAB11B;YPT3;RAB11A;RAB11;hCG_22519	Q15907;A5YM50;B4DMK0;B4DT13;Q5U0I1;Q6FHR0;Q6FI42;P62491;B2R4B6;B4DMN1	1	0.379249	0.328169	0.105645	0.0276619		Q15907
40S ribosomal protein S8;Ribosomal protein S8;Similar to ribosomal protein S8	RPS8;OK/SW-cl.83;RP11-269F19.3-001;hCG_2031852;RP11-269F19.3-003	P62241;Q5JR94;Q5JR95;Q9BS10	1	0.126298	0.268928	0.123486	0.0277259		P62241
Adenylate kinase 2, mitochondrial;ATP-AMP transphosphorylase 2;cDNA FLJ55097, highly similar to Adenylate kinase isoenzyme 2, mitochondrial (EC 2.7.4.3)	AK2;ADK2	P54819-1;P54819;A8K6L1;B4DHH7;P54819-2;B4DL64;Q5EB54;P54819-3;B4DLK2;P54819-4	1	1.3736	0.347629	0.22004	0.027854		P54819
Cytoplasmic dynein 1 light intermediate chain 2;Dynein light intermediate chain 2, cytosolic;LIC53/55;cDNA FLJ75730, highly similar to Homo sapiens dynein, cytoplasmic, light intermediate polypeptide 2 (DNCLI2), mRNA;Dynein, cytoplasmic 1, light intermediate chain 2, isoform CRA_a;cDNA FLJ56694, highly similar to Cytoplasmic dynein 1 light intermediate chain 2;cDNA FLJ52924, highly similar to Cyt…	DYNC1LI2;DNCLI2;LIC2;hCG_28828	O43237;A8K6V1;B4DHD8;B4DZP4;B4E2E0	1	0.185027	0.23175	0.17735	0.0279117		O43237
Galectin-3-binding protein;Lectin galactoside-binding soluble 3-binding protein;Mac-2-binding protein;Tumor-associated antigen 90K;Basement membrane autoantigen p105;cDNA FLJ53478, highly similar to Galectin-3-binding protein;cDNA FLJ53427, highly similar to Galectin-3-binding protein;cDNA FLJ31415 fis, clone NT2NE2000284, highly similar to Galectin-3-binding protein;cDNA FLJ54583, highly similar…	LGALS3BP;M2BP	Q08380;B4DVE1;B4DWA8;B3KP88;B4DDG4;B4DI70	1	3.22537	0.21337	0.886949	0.0281424		Q08380
Transmembrane emp24 domain-containing protein 2;RNP24 protein;Transmembrane emp24 domain trafficking protein 2, isoform CRA_a;cDNA, FLJ93436, Homo sapiens coated vesicle membrane protein (RNP24), mRNA;cDNA FLJ52153, highly similar to Transmembrane emp24 domain-containing protein 2	TMED2;RNP24;hCG_1743563	Q15363;Q6FHT8;B4DP27	1	0.0489014	0.325608	0.0846998	0.0281565		Q15363
T-complex protein 1 subunit theta;CCT-theta;Renal carcinoma antigen NY-REN-15;cDNA FLJ53379, highly similar to T-complex protein 1 subunit theta;cDNA FLJ59382, highly similar to T-complex protein 1 subunit theta;Chaperonin containing TCP1, subunit 8 (Theta) variant;CCT8 protein;Chaperonin containing TCP1, subunit 8 (Theta), isoform CRA_c	CCT8;CCTQ;KIAA0002;hCG_1810843	P50990;B4DEM7;B4DQH4;Q53HU0;Q7Z759	1	0.436095	0.187691	0.093947	0.0282556		P50990
6-phosphofructokinase type C;Phosphofructokinase 1;Phosphohexokinase;Phosphofructo-1-kinase isozyme C;6-phosphofructokinase, platelet type;Phosphofructokinase, platelet;cDNA FLJ78683, highly similar to Homo sapiens phosphofructokinase, platelet (PFKP), mRNA;cDNA FLJ35278 fis, clone PROST2006579, highly similar to 6-phosphofructokinase type C (EC 2.7.1.11);Phosphofructokinase-P;PFKP protein;Simila…	PFKP;PFKF;RP11-298E9.2-003;PFK-P;RP11-298E9.2-004	Q01813;Q5VSR8;B3KS15;O14943;Q49A78;Q5VSR7;Q8WTZ9	1	0.154912	0.31629	0.0482069	0.0282975		Q01813
Prolyl 4-hydroxylase subunit alpha-1;4-PH alpha-1;Procollagen-proline,2-oxoglutarate-4-dioxygenase subunit alpha-1;Procollagen-proline, 2-oxoglutarate 4-dioxygenase (Proline 4-hydroxylase), alpha polypeptide I;Procollagen-proline, 2-oxoglutarate 4-dioxygenase (Proline 4-hydroxylase), alpha polypeptide I variant;Procollagen-proline, 2-oxoglutarate 4-dioxygenase (Proline 4-hydroxylase), alpha polyp…	P4HA1;P4HA;RP11-344N10.1-002;hCG_19276	P13674-1;P13674;P13674-2;Q5VSQ6	1	0	0.43065	0	0.0283102		P13674
Exocyst complex component 7;Exocyst complex component Exo70;EXOC7 splice variant 6;Putative uncharacterized protein EXOC7;cDNA FLJ58532, highly similar to Exocyst complex component 7;2-5-3p;Putative uncharacterized protein DKFZp686P1551	EXOC7;EXO70;KIAA1067;DKFZp686P1551	Q9UPT5-3;Q9UPT5;B5MC69;Q9UPT5-1;B4DJ07;Q5G0E1;Q9UPT5-2;Q63HP7;Q9UPT5-4	1	0.300122	0.0619309	0.321545	0.0283207		Q9UPT5
Putative uncharacterized protein DCTN1;cDNA FLJ56465, highly similar to Dynactin-1;Dynactin subunit 1;150 kDa dynein-associated polypeptide;DAP-150;p150-glued;p135;Putative uncharacterized protein DKFZp686I0746;DCTN1 protein	DCTN1;DKFZp686I0746	A8MY36;A8MWX9;B4DM45;Q14203-1;Q14203;Q6MZZ3;Q14203-2;Q6IQ37	1	0.803387	0.0753082	0.138878	0.0283364		A8MY36
Abhydrolase domain-containing protein 10, mitochondrial	ABHD10	Q9NUJ1	1	2.33315	0.183443	0.664145	0.0284256		Q9NUJ1
Leucyl-tRNA synthetase, cytoplasmic;Leucine--tRNA ligase;LARS protein;Leucyl-tRNA synthetase;Leucyl-tRNA synthetase, isoform CRA_a;cDNA, FLJ96156, highly similar to Homo sapiens leucyl-tRNA synthetase (LARS), mRNA;cDNA FLJ58157, highly similar to Leucyl-tRNA synthetase, cytoplasmic (EC 6.1.1.4);cDNA FLJ45065 fis, clone BRAWH3024506, highly similar to Leucyl-tRNA synthetase, cytoplasmic (EC 6.1.1.…	LARS;KIAA1352;hCG_1782246;PIG44;DKFZp762P233	Q9P2J5;A7E266;B2RCM2;B4DER1;Q0VGM8;Q6NVI4;A2RRR4;B3KXA9;B4DJ10;B4E266;Q2TU79;Q9H8E3;Q9HAM7;Q9NPU8;Q9NVC0;Q9NVP8	1	0.241607	0.213901	0.210155	0.0284438		Q9P2J5
39S ribosomal protein L49, mitochondrial;L49mt;MRP-L49;Protein NOF1;Neighbor of FAU;Mitochondrial ribosomal protein L49, isoform CRA_b;cDNA, FLJ92082, Homo sapiens mitochondrial ribosomal protein L49 (MRPL49), nucleargene encoding mitochondrial protein, mRNA;Mitochondrial ribosomal protein L49 variant	MRPL49;C11orf4;NOF1;OK/SW-cl.67;hCG_23367	Q13405;B2R4G6;Q59GE9	1	0.479424	0.326026	0.446288	0.0284612		Q13405
28 kDa heat- and acid-stable phosphoprotein;PDGF-associated protein;PDGFA-associated protein 1	PDAP1;HASPP28	Q13442	1	0	0.434043	0	0.0287203		Q13442
cDNA FLJ33051 fis, clone TRACH1000063, highly similar to B-cell receptor-associated protein 31;B-cell receptor-associated protein 31, isoform CRA_b;cDNA FLJ43643 fis, clone STOMA2008546, highly similar to B-cell receptor-associated protein 31;B-cell receptor-associated protein 31 variant;B-cell receptor-associated protein 31;BCR-associated protein Bap31;p28 Bap31;Protein CDM;6C6-AG tumor-associat…	BCAP31;hCG_2004982;BAP31;DXS1357E	B3KQ79;Q53G72;Q53HT6;P51572	1	0.403427	0.226859	0.210624	0.0287579		B3KQ79
Serine/threonine-protein phosphatase 2A catalytic subunit alpha isoform;Replication protein C;Serine/threonine protein phosphatase	PPP2CA;hCG_16586	P67775;B3KQ51;B3KUN1;Q6I9T8	1	0.293079	0.247107	0.194495	0.0288749		P67775
NSFL1 cofactor p47;p97 cofactor p47;UBX domain-containing protein 2C;Putative uncharacterized protein NSFL1C;p47 protein isoform a variant;NSFL1 (P97) cofactor (P47), isoform CRA_f;cDNA, FLJ96489, Homo sapiens likely ortholog of rat p47 (p47), mRNA;cDNA FLJ36526 fis, clone TRACH2003347, highly similar to NSFL1 cofactor p47;cDNA FLJ55103, highly similar to NSFL1 cofactor p47;NSFL1 (P97) cofactor (…	NSFL1C;UBXN2C;hCG_2019614;RP4-776F14.2-005;RP4-776F14.2-004	Q9UNZ2-5;Q9UNZ2;A6ND98;Q53FF5;Q5JXA5;Q9UNZ2-1;B2RD74;Q53FE8;A2A2L1;Q9UNZ2-4;Q5JXA4	1	0.252988	0.273489	0.23025	0.0289612		Q9UNZ2
Collapsin response mediator protein 4 long variant;DPYSL3 protein;Dihydropyrimidinase-like 3;Dihydropyrimidinase-related protein 3;Unc-33-like phosphoprotein;Collapsin response mediator protein 4;cDNA FLJ57528, highly similar to Dihydropyrimidinase-related protein 3	LCRMP;DPYSL3;CRMP4;DRP3;ULIP	B3SXQ8;Q6DEN2;Q8IXW6;Q14195;B4DLZ4	1	0.157761	0.413891	0.0465927	0.0289918		B3SXQ8
T-complex protein 1 subunit epsilon;CCT-epsilon;cDNA FLJ75559, highly similar to Homo sapiens chaperonin containing TCP1, subunit 5 (epsilon) (CCT5), mRNA;Chaperonin containing TCP1, subunit 5 (Epsilon);cDNA FLJ78433, highly similar to Homo sapiens chaperonin containing TCP1, subunit 5 (epsilon) (CCT5), mRNA;cDNA FLJ50442, highly similar to T-complex protein 1 subunit epsilon;cDNA FLJ51711, highl…	CCT5;CCTE;KIAA0098;hCG_37428	P48643;A8JZY8;A8K2X8;B4DDU6;B4DE30;B4DX08;B4DYC8;B4DYD8;Q96GI1;Q9BU08;Q9HB74	1	0.346716	0.243723	0.0464011	0.02916		P48643
Plasminogen activator inhibitor 1 RNA-binding protein;PAI1 RNA-binding protein 1;SERPINE1 mRNA-binding protein 1;Putative uncharacterized protein DKFZp686P17171;PAI-1 mRNA-binding protein variant;SERPINE1 mRNA binding protein 1;cDNA, FLJ92551, Homo sapiens PAI-1 mRNA-binding protein (PAI-RBP1), mRNA	SERBP1;PAIRBP1;CGI-55;DKFZp686P17171;RP11-393N21.3-001	Q8NC51-1;Q8NC51;Q8NC51-3;Q5VU20;Q8NC51-2;Q5VU22;Q63HR1;Q8NC51-4;Q5VU21	1	0.105224	0.252137	0.182253	0.0291907		Q8NC51
Replication protein A 70 kDa DNA-binding subunit;Replication factor A protein 1;Single-stranded DNA-binding protein;cDNA FLJ75577, highly similar to Homo sapiens replication protein A1, 70kDa (RPA1), mRNA;Replication protein A1, 70kDa	RPA1;REPA1;RPA70;hCG_28721	P27694;A8K0Y9	1	0	0.438025	0	0.0292041		P27694
Caprin-1;Cytoplasmic activation- and proliferation-associated protein 1;GPI-anchored membrane protein 1;GPI-anchored protein p137;p137GPI;Cell cycle-associated protein 1;Membrane component chromosome 11 surface marker 1;cDNA FLJ46087 fis, clone TESTI2009497, highly similar to GPI-anchored protein p137;cDNA FLJ57278	CAPRIN1;GPIAP1;GPIP137;M11S1	Q14444-1;Q14444;B3KXU8;Q14444-2;B4DSF8	1	0.121256	0.212047	0.210021	0.0292762		Q14444
Myosin-14;Myosin heavy chain 14;Myosin heavy chain, non-muscle IIc;Non-muscle myosin heavy chain IIc;MYH14 variant protein;Myosin;MYH14 protein;cDNA FLJ43092 fis, clone COLON2002520, highly similar to Myosin-14;cDNA FLJ56368, highly similar to Myosin-14;cDNA FLJ16179 fis, clone BRHIP3000070, highly similar to Myosin-14	MYH14;KIAA2034;FP17425	Q7Z406-2;Q7Z406;B0I1S2;Q14780;Q7Z406-1;A1L2Z2;B3KWH4;B4E177;Q7Z406-4;B3KV65;Q7Z406-5	1	3.31089	0.364412	0.829246	0.0293853		Q7Z406
Asparaginyl-tRNA synthetase, cytoplasmic;Asparagine--tRNA ligase;cDNA FLJ52703, highly similar to Asparaginyl-tRNA synthetase, cytoplasmic (EC6.1.1.22)	NARS;ASNS	O43776;B4DN60	1	0.143179	0.380454	0.141516	0.0294482		O43776
Aspartyl-tRNA synthetase, mitochondrial;Aspartate--tRNA ligase;cDNA FLJ76156, highly similar to Homo sapiens aspartyl-tRNA synthetase 2 (DARS2), mRNA;cDNA FLJ12692 fis, clone NT2RM4002623, weakly similar to ASPARTYL-TRNA SYNTHETASE (EC 6.1.1.12);cDNA FLJ10514 fis, clone NT2RP2000710, weakly similar to ASPARTYL-TRNA SYNTHETASE (EC 6.1.1.12)	DARS2	Q6PI48;A8K4A8;Q9H9J7;Q9NVT8	1	0.312376	0.154999	0.280638	0.0294779		Q6PI48
Protein flightless-1 homolog;cDNA FLJ50778, highly similar to Protein flightless-1 homolog;cDNA FLJ50164, highly similar to Protein flightless-1 homolog;cDNA FLJ51784, highly similar to Protein flightless-1 homolog;Flightless I homolog variant	FLII;FLIL	Q13045;B4DIX0;B4DIL0;B4DNA8;Q59H95	1	0.427509	0.0549052	0.28115	0.0295124		Q13045
Gelsolin;Actin-depolymerizing factor;Brevin;AGEL;Gelsolin (Amyloidosis, Finnish type);Gelsolin (Amyloidosis, Finnish type), isoform CRA_c;cDNA, FLJ96557, Homo sapiens gelsolin (amyloidosis, Finnish type) (GSN), mRNA;Putative uncharacterized protein DKFZp313L0718;cDNA FLJ38961 fis, clone NT2RI2000276, highly similar to Gelsolin;cDNA FLJ43831 fis, clone TESTI4005534, highly similar to Gelsolin;Gels…	GSN;RP11-477J21.1-001;hCG_27454;RP11-477J21.1-003;DKFZp313L0718;RP11-477J21.1-013	P06396-1;P06396;Q5T0I2;Q5T0I1;Q69YR8;P06396-2;A2A418;Q3SX14	1	0.67922	0.080683	0.0718852	0.0297204		P06396
Beta-lactamase-like protein 2;cDNA FLJ76011, highly similar to Homo sapiens lactamase, beta 2 (LACTB2), mRNA	LACTB2;CGI-83	Q53H82;A8K2D6	1	0	0.442261	0	0.029722		Q53H82
Dystrophin;DMD protein;Duchenne muscular dystrophy gene;Duchenne muscular dystrophy protein	DMD;GS1-19O24.1-002;GS1-19O24.1-006;GS1-19O24.1-004	P11532-1;P11532;P11532-4;Q4G0X0;Q6PK12;Q8WYE2;B1AK23;Q548X2;Q7KZ40;Q8WYE3;Q8WYE4;Q8WYE5;Q8WYE6;Q8WYE7;Q8WYE8;Q8WYE9;Q8WYF0;Q8WYF1;Q8WYF2;Q8WYF5;Q9UMG1;Q9UPB5;Q8WYD8;Q8WYD9;Q8WYE0;Q8WYE1;Q9UEH4;Q9UPB4;P11532-2;P11532-3;Q14172;Q8WYC7;Q8WYC8;Q8WYC9;Q8WYD0;Q8WYD1;Q8WYD2;Q8WYD3;Q8WYD4;Q8WYD5;Q8WYD6;Q8WYD7;Q9UME2;Q9UMK7;Q9UMK8	1	2.06454	0.194434	0.434815	0.0297531		P11532
Collagen alpha-1(XII) chain;Collagen, type XII, alpha 1	COL12A1;COL12A1L;RP1-238D15.1-007	Q99715-1;Q99715;Q99715-4;Q99715-2;A2A2K4	1	0.0505473	0.480372	0.0875504	0.0297567		Q99715
Synaptopodin-2;Myopodin;Genethonin-2;cDNA FLJ54419, highly similar to Synaptopodin-2;Synaptopodin 2;Myopodin isoform 2	SYNPO2	Q9UMS6;B4DLE4;B2RWP6;B2Y8J9	1	4.65859	0.623441	1.64322	0.02989		Q9UMS6
Acyl-protein thioesterase 1;Lysophospholipase 1;Lysophospholipase I;cDNA FLJ60607, highly similar to Acyl-protein thioesterase 1 (EC 3.1.2.-);LYPLA1 protein;cDNA FLJ78542, highly similar to Homo sapiens lysophospholipase I (LYPLA1), mRNA;Lysophospholipase I, isoform CRA_a;cDNA, FLJ94339, Homo sapiens lysophospholipase I (LYPLA1), mRNA;cDNA FLJ52008, highly similar to Acyl-protein thioesterase 1 (…	LYPLA1;APT1;LPL1;hCG_1983522	O75608-1;O75608;B4DJV9;Q6IAQ1;O75608-2;B4DP64	1	2.17982	0.344826	0.867146	0.0299548		O75608
Glutamate receptor-like protein 1A;GRINL1A combined protein;GRINL1A complex locus protein 1;GRINL1A upstream protein;Protein GRINL1A	GCOM1;GRINL1A	Q6K051-2;Q6K051;Q6K051-5;Q6K051-1;Q6K051-3;Q6K051-11;Q6K051-4;Q6K051-6;Q6K051-7;Q6K051-10;Q6K051-8;Q6K051-9	1	7.03954	1.73205	1.68111	0.0300391		Q6K051
Putative uncharacterized protein WDR1;WD repeat-containing protein 1 isoform 1 variant;WD repeat domain 1, isoform CRA_a;WD repeat-containing protein 1;Actin-interacting protein 1;NORI-1;cDNA FLJ45763 fis, clone N1ESE2000698, highly similar to WD repeat protein 1;cDNA FLJ58303, highly similar to WD repeat protein 1	WDR1;hCG_19377	A8MPU4;Q53GN4;Q59ER5;O75083-1;O75083;A8MVA9;Q53H17;O75083-2;O75083-3;B3KXN4;B4DY05	1	0.377626	0.273815	0.0214098	0.0301782		A8MPU4
Mitochondrial import receptor subunit TOM40 homolog;Translocase of outer membrane 40 kDa subunit homolog;Protein Haymaker;p38.5	TOMM40;C19orf1;PEREC1;TOM40	O96008-1;O96008;O96008-2	1	0	0.446604	0	0.0302565		O96008
Profilin-1;Profilin I;Profilin	PFN1;hCG_32691	P07737;Q53Y44	1	0.314275	0.375889	0.171064	0.0304527		P07737
Ribosomal protein L10;60S ribosomal protein L10;Protein QM;Tumor suppressor QM;Laminin receptor homolog	RPL10;XX-FW83563B9.1-011;DXS648E;QM	Q5HY50;P27635	1	0.206973	0.284943	0.230631	0.0305426		Q5HY50
6-phosphofructokinase, liver type;Phosphofructokinase 1;Phosphohexokinase;Phosphofructo-1-kinase isozyme B;cDNA FLJ30173 fis, clone BRACE2000969, highly similar to 6-phosphofructokinase, liver type (EC 2.7.1.11);cDNA FLJ61026, highly similar to Homo sapiens phosphofructokinase, liver (PFKL), transcript variant 1, mRNA;Liver phosphofructokinase isoform a variant;Putative uncharacterized protein DK…	PFKL;DKFZp686L2097;DKFZp686G1648	P17858-1;P17858;B3KNQ7;B4E108;Q59GI2;Q6MZK4;Q7L2M7;Q7Z3R9;Q9BSP4;P17858-2	1	0.252432	0.432359	0.201498	0.0305502		P17858
Heat shock 70 kDa protein 1;HSP70.1;HSP70-1/HSP70-2;Heat shock 70kDa protein 1A;Heat shock 70kDa protein 1B;cDNA FLJ75127, highly similar to Homo sapiens heat shock 70kDa protein 1A, mRNA;cDNA FLJ54328, highly similar to Heat shock 70 kDa protein 1;cDNA FLJ54283, highly similar to Heat shock 70 kDa protein 1;Heat shock protein 72;cDNA FLJ54370, highly similar to Heat shock 70 kDa protein 1;cDNA F…	HSPA1A;HSPA1;HSPA1B;DAAP-21F2.7-001;DAAP-21F2.8-001;DADB-333F21.2-001;DADB-333F21.4-001;hCG_1820593;hCG_43726;HSP70-1;DAAP-21F2.8-002;DADB-333F21.4-002;DAQB-147D11.2-002;XXbac-BCX40G17.4-002;XXbac-BPG254B15.2-002	P08107;A8K5I0;B4DI39;B4E1S9;Q9UQC1;B4DNT8;B4DWK5;Q59EJ3;B4E388;B3KTT5;B4DVU9;Q5SP16;B4DNX1;B4E1T6	1	0.619008	0.101746	0.0986433	0.0307342		P08107
Protein AMBP;Alpha-1-microglobulin;Complex-forming glycoprotein heterogeneous in charge;Alpha-1 microglycoprotein;Inter-alpha-trypsin inhibitor light chain;Bikunin;HI-30;Uronic-acid-rich protein;EDC1;Trypstatin;Inter-alpha-trypsin inhibitor	AMBP;HCP;ITIL	P02760;P78492	1	0.719149	0.265256	0.143212	0.0307711		P02760
ATP-dependent DNA helicase 2 subunit 1;ATP-dependent DNA helicase II 70 kDa subunit;Lupus Ku autoantigen protein p70;70 kDa subunit of Ku antigen;Thyroid-lupus autoantigen;CTC box-binding factor 75 kDa subunit;DNA repair protein XRCC6;cDNA, FLJ96699, highly similar to Homo sapiens thyroid autoantigen 70kDa (Ku antigen) (G22P1), mRNA;X-ray repair complementing defective repair in Chinese hamster c…	XRCC6;G22P1;CTA-216E10.7-005;CTA-216E10.7-002;hCG_2013151;CTA-216E10.7-004	P12956;B2RDN9;B1AHC9;B4DE32;B4E356;Q6IC76;B1AHC8;B1AHC7	1	0.143155	0.340606	0.0466687	0.0308461		P12956
Threonyl-tRNA synthetase, cytoplasmic;Threonine--tRNA ligase;cDNA FLJ75173, highly similar to Homo sapiens threonyl-tRNA synthetase, mRNA;Threonyl-tRNA synthetase, isoform CRA_b;cDNA, FLJ96812, highly similar to Homo sapiens threonyl-tRNA synthetase (TARS), mRNA;cDNA FLJ38533 fis, clone HCHON2001108, highly similar to Threonyl-tRNA synthetase, cytoplasmic (EC 6.1.1.3);Threonyl-tRNA synthetase var…	TARS;hCG_36827	P26639;A8K8I1;B2RDX5;B3KTN2;Q53GX7;Q5M7Z9;B4DEG8;B4DKZ9	1	0.554156	0.288527	0.235867	0.0310546		P26639
Ankyrin-3;Ankyrin-G	ANK3	Q12955;Q5VXD5	1	0.448247	0.268773	0.0270303	0.0312419		Q12955
Ras-associated and pleckstrin homology domains-containing protein 1;Lamellipodin;Proline-rich EVH1 ligand 2;Protein RMO1;Amyotrophic lateral sclerosis 2 chromosomal region candidate gene 9 protein	RAPH1;ALS2CR18;ALS2CR9;KIAA1681;LPD;PREL2;RMO1	Q70E73-6;Q70E73;Q70E73-10	1	0	0.454825	0	0.0312773		Q70E73
Uncharacterized potential DNA-binding protein C17orf49	C17orf49	Q8IXM2	1	0	0.455806	0	0.0313999		Q8IXM2
cDNA FLJ51091, highly similar to 65 kDa Yes-associated protein;cDNA FLJ51192, highly similar to 65 kDa Yes-associated protein;Yes-associated protein 2;Yes-associated protein 1, 65kDa, isoform CRA_a;Putative uncharacterized protein DKFZp451O0517;YAP1 protein;Yes-associated protein 1, 65kDa, isoform CRA_d;65 kDa Yes-associated protein;YAP65	YAP2;YAP1;hCG_41478;DKFZp451O0517;YAP65	B4DTY1;B4E2Y3;Q7Z574;Q86T74;Q8IUY9;P46937	1	0	0.455808	0	0.0314002		B4DTY1
Coatomer subunit gamma;Gamma-coat protein;cDNA FLJ77708, highly similar to Homo sapiens coatomer protein complex, subunit gamma (COPG), mRNA;cDNA FLJ10862 fis, clone NT2RP4001574, highly similar to Coatomer subunit gamma;cDNA FLJ41945 fis, clone PLACE6019676, highly similar to Coatomer subunit gamma;Gamma1-COP;Coatomer protein complex, subunit gamma, isoform CRA_a;COPG protein	COPG;COPG1;hCG_1791262	Q9Y678;A8K6M8;B3KMF6;B3KW21;Q54AC4;Q8WUI6	1	0.176889	0.37896	0.15776	0.0314261		Q9Y678
Ubiquitin-conjugating enzyme E2 O;Ubiquitin-protein ligase O;Ubiquitin carrier protein O;Ubiquitin-conjugating enzyme E2 of 230 kDa	UBE2O;KIAA1734	Q9C0C9	1	0.168707	0.0872537	0.29221	0.031475		Q9C0C9
Filamin B;Filamin-B;Beta-filamin;Actin-binding-like protein;Thyroid autoantigen;Truncated actin-binding protein;ABP-280 homolog;ABP-278;Filamin 3;Filamin homolog 1;Putative uncharacterized protein DKFZp686A1668;Filamin B variant 2	FLNB;FLN1L;FLN3;TABP;TAP;DKFZp686A1668	B2ZZ83;O75369-7;O75369;Q60FE7;Q68CT4;O75369-1;B2ZZ85;O75369-2;B2ZZ84;O75369-3;O75369-6;O75369-4;Q8WXT3;O75369-5	1	0.565895	0.236025	0.0430693	0.0314942		B2ZZ83
Glycosyltransferase 25 family member 1;cDNA FLJ32578 fis, clone SPLEN2000258, highly similar to Homo sapiens glycosyltransferase 25 domain containing 1 (GLT25D1), mRNA;GLT25D1 protein;cDNA: FLJ22329 fis, clone HRC05659	GLT25D1;PSEC0241	Q8NBJ5;B3KQ10;Q8WUI9;Q9H6F1	1	0	0.458271	0	0.0317088		Q8NBJ5
40S ribosomal protein S9;Ribosomal protein S9;Ribosomal protein S9, isoform CRA_a;Putative uncharacterized protein RPS9;Ribosomal protein S9, isoform CRA_c;RPS9 protein	RPS9;XXbac-BCX105G6.6-001;XXbac-BPG111L9.6-001;hCG_2009111	P46781;A9C4C1;B5MCT8;A5D904	1	0.150623	0.33768	0.0597699	0.0318572		P46781
Host cell factor;HCF-1;C1 factor;VP16 accessory protein;VCAF;CFF;HCF N-terminal chain 1;HCF N-terminal chain 2;HCF N-terminal chain 3;HCF N-terminal chain 4;HCF N-terminal chain 5;HCF N-terminal chain 6;HCF C-terminal chain 1;HCF C-terminal chain 2;HCF C-terminal chain 3;HCF C-terminal chain 4;HCF C-terminal chain 5;HCF C-terminal chain 6;HCFC1 protein;Putative uncharacterized protein HCFC1	HCFC1;HCF1;HFC1	P51610-1;P51610;Q05C05;P51610-2;A6NEM2	1	0.132238	0.363258	0.116374	0.0319308		P51610
cDNA FLJ55467, highly similar to Septin-2;Putative uncharacterized protein NEDD5;Septin-2;Neural precursor cell expressed developmentally down-regulated protein 5;Putative uncharacterized protein SEPT2	NEDD5;SEPT2;DIFF6;KIAA0158	B4DGE8;Q53QU3;Q15019;B5MCX3	1	0.428018	0.166543	0.177917	0.0319589		B4DGE8
Eukaryotic translation initiation factor 3 subunit B;Eukaryotic translation initiation factor 3 subunit 9;eIF-3-eta;eIF3 p116;eIF3 p110;Prt1 homolog;Eukaryotic translation initiation factor 3, subunit 9 eta, 116kDa;Eukaryotic translation initiation factor 3, subunit 9 eta, 116kDa, isoform CRA_b;cDNA FLJ53410, highly similar to Eukaryotic translation initiation factor 3 subunit 9;cDNA FLJ53461, hi…	EIF3B;EIF3S9;hCG_1998988;tcag7.544	P55884-2;P55884;P55884-1;A4D210;B4DV79;B4DXN6;Q59FS8;Q86UM1;Q96G38	1	0.204993	0.272001	0.177611	0.0319792		P55884
14-3-3 protein gamma;Protein kinase C inhibitor protein 1;14-3-3 protein gamma, N-terminally processed;cDNA FLJ14168 fis, clone NT2RP2001440, highly similar to 14-3-3 protein gamma;cDNA FLJ51843, highly similar to 14-3-3 protein gamma;cDNA FLJ52141, highly similar to 14-3-3 protein gamma	YWHAG	P61981;B3KNB4;B4DHC4;B4DE78	1	0.590704	0.327646	0.205121	0.0320232		P61981
Vacuolar protein sorting 28 homolog (S. cerevisiae);Vacuolar protein sorting-associated protein 28 homolog;ESCRT-I complex subunit VPS28;H-Vps28;Vacuolar sorting protein 28;Vacuolar protein sorting 28 (Yeast), isoform CRA_a	VPS28;hCG_24005	Q86VK0;Q9UK41;Q548N1	1	0.130136	0.265965	0.225402	0.0320547		Q86VK0
Carboxymethylenebutenolidase homolog;cDNA, FLJ96437	CMBL	Q96DG6;B2RD36	1	4.3088	0.44839	1.36035	0.032079		Q96DG6
Haptoglobin;Haptoglobin alpha chain;Haptoglobin beta chain;HP protein;cDNA FLJ31310 fis, clone LIVER1000165, highly similar to Haptoglobin	HP	P00738;Q0VAC5;Q6PEJ8;B3KP77;Q6NSB4	1	6.95943	0.183572	2.91885	0.0321579		P00738
Acetyl-coenzyme A transporter 1;Solute carrier family 33 member 1;Solute carrier family 33 (Acetyl-CoA transporter), member 1, isoform CRA_a;cDNA, FLJ92565, Homo sapiens solute carrier family 33 (acetyl-CoA transporter),member 1 (SLC33A1), mRNA	SLC33A1;ACATN;AT1;hCG_2022174	O00400;B2R5Q2	1	0	0.464212	0	0.0324574		O00400
TRIO and F-actin-binding protein;Protein Tara;Trio-associated repeat on actin;Putative uncharacterized protein TRIOBP;TRIO and F-actin binding protein	TRIOBP;KIAA1662;TARA;HRIHFB2122;Z83844.4-005	Q9H2D6-1;Q9H2D6;Q9H2D6-3;Q9H2D6-2;Q9H2D6-5;A6NID1;B1AHD6	1	0	0.464942	0	0.0325497		Q9H2D6
DnaJ homolog subfamily C member 13;Required for receptor-mediated endocytosis 8;DnaJ (Hsp40) homolog, subfamily C, member 13;cDNA FLJ13106 fis, clone NT2RP3002455, highly similar to DnaJ homolog subfamily C member 13;DNAJC13 protein	DNAJC13;KIAA0678;RME8	O75165;A7E2Y5;B3KN02;Q0D2M7	1	0	0.466728	0	0.0327762		O75165
Importin subunit alpha-2;Karyopherin subunit alpha-2;SRP1-alpha;RAG cohort protein 1;cDNA FLJ78270, highly similar to Homo sapiens karyopherin alpha 2 (RAG cohort 1, importin alpha 1)(KPNA2), mRNA;Karyopherin alpha 2 (RAG cohort 1, importin alpha 1)	KPNA2;RCH1;SRP1	P52292;A8K7D9;Q53YE3;Q6NVW7;Q7Z726	1	0	0.467205	0	0.0328368		P52292
Nuclear pore complex protein Nup155;Nucleoporin Nup155;155 kDa nucleoporin;cDNA FLJ56637, highly similar to Nuclear pore complex protein Nup155;cDNA FLJ11241 fis, clone PLACE1008603, highly similar to Nuclear pore complex protein Nup155	NUP155;KIAA0791	O75694-1;O75694;B4DLT2;O75694-2;B3KMK3	1	0	0.467488	0	0.0328728		O75694
Long-chain-fatty-acid--CoA ligase 1;Long-chain acyl-CoA synthetase 1;Long-chain acyl-CoA synthetase 2;Palmitoyl-CoA ligase 1;Palmitoyl-CoA ligase 2;Acyl-CoA synthetase 1;Long-chain fatty acid-CoA ligase 2;cDNA FLJ76467, highly similar to Homo sapiens acyl-CoA synthetase long-chain family member 1 (ACSL1), mRNA;Acyl-CoA synthetase long-chain family member 1 isoform a;cDNA FLJ54220, highly similar …	ACSL1;FACL1;FACL2;LACS;LACS1;LACS2	P33121-1;P33121;A8K9T3;Q108N1;P33121-2;B4E0R0	1	6.82535	0.350314	2.70206	0.0328969		P33121
Transcription factor BTF3 homolog 4;Basic transcription factor 3-like 4;Basic transcription factor 3-like 4, isoform CRA_c;cDNA FLJ14676 fis, clone NT2RP2004013, highly similar to Transcription factor BTF3 homolog 4;BTF3L4 protein	BTF3L4;hCG_2031635	Q96K17;B3KNJ1;Q6PJ77	1	0.0366639	0.420029	0.0635038	0.0329153		Q96K17
Prenylcysteine oxidase 1;Prenylcysteine lyase;cDNA, FLJ95254, highly similar to Homo sapiens prenylcysteine lyase (PCL1), mRNA;Putative uncharacterized protein PCYOX1	PCYOX1;KIAA0908;PCL1;UNQ597/PRO1183;hCG_1643219	Q9UHG3;B2RB14;Q53ST0;Q584P1	1	1.72018	0.239286	0.324177	0.0329887		Q9UHG3
cDNA, FLJ94230, highly similar to Homo sapiens thioredoxin-like 1 (TXNL1), mRNA;Thioredoxin-like protein 1;32 kDa thioredoxin-related protein;cDNA FLJ37607 fis, clone BRCOC2010980, highly similar to Thioredoxin-like protein 1;Thioredoxin-like 1 variant	TXNL1;TRP32;TXL;TXNL	B2R960;O43396;B3KT45;Q59G46	1	0.567899	0.160934	0.0710336	0.0330503		B2R960
Hemoglobin subunit beta;Hemoglobin beta chain;Beta-globin;LVV-hemorphin-7;Hemoglobin beta globin chain;Beta-globin Tacoma variant;Beta-globin Showa Yakushiji variant;Beta globin;Mutant beta-globin;Hbbm fused globin protein;Hemoglobin beta;Beta globin chain;Mutant hemoglobin beta chain;Hemoglobin beta chain variant Hb.Sinai-Bel Air;Hemoglobin beta chain variant Hb-I_Toulouse;Mutant beta globin;Par…	HBB	P68871;A1YZ08;A4GX73;B2M0Y1;B2M1S6;B2M1S7;B2ZUE0;B3VL05;B3VL17;B3VL31;B3VL86;Q14477;Q3LR79;Q3Y9I8;Q4JLR8;Q4TWB7;Q4TZM4;Q52MT0;Q549N7;Q6J1Z7;Q6J1Z8;Q6R7N2;Q6V0K9;Q6VFQ5;Q6VFQ6;Q8IUL9;Q8IZI0;Q9BWU5;Q9BWV6;Q9GZL9;Q9UE58;Q9UK54;Q14473;A9YUX2;B3VL12;B5ANL9;O95408;O95412;Q0Z944;Q14484;Q7Z2K5;Q7Z7B3;Q86VF0;Q9BXA2;Q9H1I6;Q9HAR8;Q9UBV6;Q9UP81	1	4.34956	0.184715	1.46961	0.0330555		P68871
Uncharacterized protein KIAA0564;cDNA FLJ37836 fis, clone BRSSN2010587, weakly similar to Homo sapiens MDN1, midasin homolog (yeast) (MDN1), mRNA	KIAA0564	A3KMH1-1;A3KMH1;A3KMH1-2;B3KT81;A3KMH1-3	1	2.81151	0.306628	1.05428	0.0330912		A3KMH1
HEAT repeat-containing protein 1;Protein BAP28;HEATR1 protein;HEAT repeat containing 1;cDNA FLJ53502, highly similar to HEAT repeat-containing protein 1;cDNA FLJ40893 fis, clone UTERU2001607;cDNA FLJ43675 fis, clone SYNOV4008440, highly similar to HEAT repeat-containing protein 1	HEATR1;BAP28;RP11-385F5.3-002	Q9H583;A2VDI1;B2RWN5;B4E263;Q8N7L7;Q96ES5;B3KWS1;Q5T3Q7	1	0	0.469255	0	0.0330976		Q9H583
Protein DJ-1;Oncogene DJ1;Parkinson disease protein 7;Parkinson disease (Autosomal recessive, early onset) 7;cDNA, FLJ92274, highly similar to Homo sapiens Parkinson disease (autosomal recessive, early onset) 7 (PARK7), mRNA	PARK7;hCG_2006386	Q99497;B2R4Z1	1	1.57025	0.15715	0.422578	0.0332954		Q99497
Fructose-bisphosphate aldolase C;Brain-type aldolase;Fructose-bisphosphate aldolase;Putative uncharacterized protein ALDOC	ALDOC;ALDC;hCG_31801	P09972;B2R5R3;A8MVZ9	1	0.62309	0.190593	0.10457	0.033387		P09972
cDNA FLJ77033, highly similar to Homo sapiens hydroxyacylglutathione hydrolase (HAGH), mRNA;cDNA FLJ60825, highly similar to Homo sapiens hydroxyacylglutathione hydrolase (HAGH), transcript variant 1, mRNA;cDNA FLJ60347, highly similar to Homo sapiens hydroxyacylglutathione hydrolase (HAGH), transcript variant 1, mRNA;Hydroxyacylglutathione hydrolase;Glyoxalase II	HAGH;GLO2;HAGH1	A8K290;B4DRA7;B4DT01;Q16775	1	1.69352	0.230037	0.198592	0.0334343		A8K290
3-hydroxyacyl-CoA dehydrogenase type-2;3-hydroxyacyl-CoA dehydrogenase type II;Type II HADH;3-hydroxy-2-methylbutyryl-CoA dehydrogenase;17-beta-hydroxysteroid dehydrogenase 10;Mitochondrial ribonuclease P protein 2;Endoplasmic reticulum-associated amyloid beta-peptide-binding protein;Short-chain type dehydrogenase/reductase XH98G2;HADH2 protein;Hydroxysteroid (17-beta) dehydrogenase 10;Hydroxyacy…	HSD17B10;ERAB;HADH2;MRPP2;SCHAD;XH98G2;RP3-339A18.2-001;hCG_19788;RP3-339A18.2-002;RP3-339A18.2-004	Q99714-1;Q99714;Q6IBS9;Q99714-2;Q5H927;Q5H928	1	0.549486	0.198402	0.0327567	0.0335787		Q99714
60S ribosomal protein L13a;23 kDa highly basic protein;Ribosomal protein L13a variant;FWP004;RPL13A protein;Novel protein similar to ribosomal protein L13a RPL13A;Ribosomal protein L13a;Ribosomal protein L13a, isoform CRA_b	RPL13A;RP11-365K22.1-001;RPL13a;hCG_1998057	P40429;Q53H34;Q5QTS3;Q9BSQ6;Q5VY36;Q0VGL3;Q8J015	1	0.308211	0.367705	0.040541	0.0336601		P40429
Calpain small subunit 1;Calcium-dependent protease small subunit 1;Calcium-dependent protease small subunit;Calpain regulatory subunit;Calcium-activated neutral proteinase small subunit	CAPNS1;CAPN4;CAPNS	P04632	1	0.647967	0.159036	0.300898	0.0336815		P04632
NDRG family member 3;NDRG family member 3, isoform CRA_c;Protein NDRG3;NDRG family member 3, isoform CRA_d;Putative uncharacterized protein NDRG3	NDRG3;RP3-460J8.1-003;hCG_1785125;RP3-460J8.1-005	Q5TH30;Q9UGV2-1;Q9UGV2;Q9UGV2-2;A2A2S8;Q9UGV2-3;A6NP49	1	0.511728	0.352229	0.484253	0.0337116		Q5TH30
ATP-dependent RNA helicase DDX1;DEAD box protein 1;DEAD box protein retinoblastoma;DEAD box polypeptide 1;DEAD (Asp-Glu-Ala-Asp) box polypeptide 1, isoform CRA_d;cDNA, FLJ94573, Homo sapiens DEAD (Asp-Glu-Ala-Asp) box polypeptide 1 (DDX1), mRNA;cDNA FLJ57326, highly similar to ATP-dependent RNA helicase DDX1 (EC 3.6.1.-);cDNA FLJ51017, highly similar to ATP-dependent RNA helicase DDX1 (EC 3.6.1.-…	DDX1;hCG_15914	Q92499;A3RJH1;B4DME8;B4DP70;B4DPN6	1	0.642754	0.162831	0.212886	0.0337467		Q92499
cDNA FLJ77718;Cellular nucleic acid binding protein alpha variant 1;Zinc finger protein 9 (A cellular retroviral nucleic acid binding protein);Cellular nucleic acid-binding protein;Zinc finger protein 9;Zinc finger protein 9 (A cellular retroviral nucleic acid binding protein), isoform CRA_c;cDNA, FLJ95153, Homo sapiens zinc finger protein 9 (a cellular retroviral nucleicacid binding protein) (ZN…	CNBP;RNF163;ZNF9;hCG_20000	A8K7V4;Q5U0E9;P62633-1;P62633;B2RAV9;Q4JGY0;Q4JGY1;P62633-2;P62633-3;B4DP17;Q6T598	1	0.191707	0.558667	0.209051	0.0338129		A8K7V4
Ras-related protein R-Ras2;Ras-like protein TC21;Teratocarcinoma oncogene;Related RAS viral (R-ras) oncogene homolog 2, isoform CRA_b;cDNA, FLJ94625, Homo sapiens related RAS viral (r-ras) oncogene homolog 2 (RRAS2),mRNA	RRAS2;TC21;hCG_1991895	P62070;B2R9Z3	1	2.06541	0.240708	0.271969	0.0338805		P62070
cDNA FLJ58953, highly similar to 40S ribosomal protein S20;40S ribosomal protein S20;Ribosomal protein S20, isoform CRA_b;Ribosomal protein S20, isoform CRA_c;cDNA, FLJ92069, Homo sapiens ribosomal protein S20 (RPS20), mRNA	RPS20;hCG_40753	B4DW28;P60866;B2R4F4	1	0.216518	0.294328	0.191347	0.0340097		B4DW28
Peroxiredoxin-1;Thioredoxin peroxidase 2;Thioredoxin-dependent peroxide reductase 2;Proliferation-associated gene protein;Natural killer cell-enhancing factor A;cDNA, FLJ92164, highly similar to Homo sapiens peroxiredoxin 1 (PRDX1), mRNA;Peroxiredoxin 1 (Peroxiredoxin 1, isoform CRA_a)	PRDX1;PAGA;PAGB;TDPX2;hCG_1780053	Q06830;B2R4P2;B5BU26	1	0.78622	0.13066	0.23092	0.0341574		Q06830
Xaa-Pro aminopeptidase 1;X-Pro aminopeptidase 1;X-prolyl aminopeptidase 1, soluble;Cytosolic aminopeptidase P;Soluble aminopeptidase P;Aminoacylproline aminopeptidase;cDNA FLJ76203, highly similar to Homo sapiens X-prolyl aminopeptidase (aminopeptidase P) 1, soluble (XPNPEP1), mRNA;cDNA FLJ36374 fis, clone THYMU2008185, highly similar to Xaa-Pro aminopeptidase 1 (EC 3.4.11.9);cDNA FLJ58474, highl…	XPNPEP1;XPNPEPL;XPNPEPL1;RP11-451M19.1-002;RP11-451M19.1-016	Q9NQW7-1;Q9NQW7;A8K071;B3KSI7;B4E2P4;Q9NQW7-2;Q5T6H2;B4DIS4;Q5T6H7	1	0.495395	0.19154	0.0610881	0.0342227		Q9NQW7
Nuclear transport factor 2;Placental protein 15;Nuclear transport factor 2, isoform CRA_a;cDNA, FLJ92083, Homo sapiens nuclear transport factor 2 (NUTF2), mRNA	NUTF2;NTF2;hCG_28108	P61970;B2R4G7	1	0.377161	0.480789	0.383354	0.0343195		P61970
Uncharacterized protein C10orf58;Putative uncharacterized protein C10orf58;cDNA, FLJ96497	C10orf58;PRO2290;PSEC0139;UNQ611/PRO1198	Q9BRX8;A6NDF1;B2RD81	1	0.264803	0.469524	0.121559	0.0343861		Q9BRX8
LRR FLI-I interacting protein 1;cDNA FLJ52713, moderately similar to Mus musculus leucine rich repeat (in FLII) interacting protein 1 (Lrrfip1), mRNA;LRRFIP1 protein;Putative uncharacterized protein tmp_locus_7	LRRFIP1;tmp_locus_7	Q9Y607;B4DPC0;Q9BSL6	1	0.156021	0.157313	0.270236	0.0343929		Q9Y607
Prosaposin;Proactivator polypeptide;Saposin-A;Protein A;Saposin-B-Val;Saposin-B;Sphingolipid activator protein 1;Cerebroside sulfate activator;Dispersin;Sulfatide/GM1 activator;Saposin-C;Co-beta-glucosidase;A1 activator;Glucosylceramidase activator;Sphingolipid activator protein 2;Saposin-D;Protein C;Component C;cDNA FLJ54596, highly similar to Proactivator polypeptide;cDNA FLJ54136, highly simil…	PSAP;RP11-472K8.1-002;GLBA;SAP1;RP11-472K8.1-001;hCG_1787837	B1AVU8;P07602-3;P07602;B4DEK5;B4DRB7;O75905;Q59EN5;P07602-2;Q53FJ5;P07602-1;Q53Y86;Q5BJH1	1	2.35495	0.366037	0.809149	0.034548		B1AVU8
ATP-dependent DNA helicase Q1;DNA-dependent ATPase Q1;cDNA FLJ76305, highly similar to Homo sapiens RecQ protein-like (DNA helicase Q1-like) (RECQL), transcript variant 1, mRNA;RecQ protein-like (DNA helicase Q1-like), isoform CRA_a;Putative uncharacterized protein RECQL	RECQL;RECQL1;hCG_2009728	P46063;A8K6G2;A8MUG3	1	0.709705	0.127863	0.0908408	0.0345794		P46063
Titin;Connectin;Rhabdomyosarcoma antigen MU-RMS-40.14	TTN	Q8WZ42-8;Q8WZ42;Q8WZ42-1;Q8WZ42-2;Q8WZ42-7;Q8WZ42-4	1	1.41636	0.16936	0.192306	0.0345829		Q8WZ42
T-complex protein 1 subunit beta;CCT-beta;cDNA FLJ75037, highly similar to Homo sapiens chaperonin containing TCP1, subunit 2 (beta) (CCT2),mRNA;PRO1633	CCT2;99D8.1;CCTB	P78371;A8K402;B5BTY7;Q9H369	1	0.375169	0.279065	0.0678413	0.0345976		P78371
Dihydrolipoyl dehydrogenase, mitochondrial;Dihydrolipoamide dehydrogenase;Glycine cleavage system L protein;Dihydrolipoyl dehydrogenase;cDNA FLJ50515, highly similar to Dihydrolipoyl dehydrogenase, mitochondrial (EC 1.8.1.4);cDNA FLJ56112, highly similar to Dihydrolipoyl dehydrogenase, mitochondrial (EC 1.8.1.4)	DLD;GCSL;LAD;PHE3;hCG_17110	P09622;B2R5X0;B4DFL1;B4DHG0;B4DMK9	1	1.66538	0.254736	0.241075	0.0346262		P09622
NADH dehydrogenase [ubiquinone] 1 alpha subcomplex subunit 10, mitochondrial;NADH-ubiquinone oxidoreductase 42 kDa subunit;Complex I-42kD;cDNA FLJ76144, highly similar to Homo sapiens NADH dehydrogenase (ubiquinone) 1 alpha subcomplex, 10, 42kDa (NDUFA10), mRNA;Putative uncharacterized protein NDUFA10;NADH dehydrogenase;NADH dehydrogenase ubiquinone 1 alpha subcomplex	NDUFA10	O95299;A8K413;Q53QE8;Q53SW4;Q7Z518;Q8WXC9	1	2.33677	0.253659	0.537505	0.0347026		O95299
Proteasome subunit beta type-5;Proteasome epsilon chain;Macropain epsilon chain;Multicatalytic endopeptidase complex epsilon chain;Proteasome subunit X;Proteasome chain 6;Proteasome subunit MB1;Proteasome subunit beta type	PSMB5;LMPX;hCG_41732	P28074;B2R4N9	1	0.440671	0.334438	0.0911166	0.0347892		P28074
Mitochondrial import receptor subunit TOM7 homolog;Translocase of outer membrane 7 kDa subunit homolog;TOMM7 protein;Translocase of outer mitochondrial membrane 7 homolog (Yeast);Putative uncharacterized protein TOM7;Translocase of outer mitochondrial membrane 7 homolog (Yeast), isoform CRA_b;Putative uncharacterized protein TOMM7;Translocase of outer mitochondrial membrane 7 homolog (Yeast), iso…	TOMM7;TOM7;TOMM07;AD-014;hCG_1659575	Q9P0U1;Q75MR5;B5MD00	1	0	0.482451	0	0.0347927		Q9P0U1
Glutathione S-transferase Mu 1;GSTM1-1;GST class-mu 1;GSTM1a-1a;GSTM1b-1b;HB subunit 4;GTH4;GSTM1 protein	GSTM1;GST1	P09488;Q16041;Q8TC98	1	2.53626	1.03332	1.68928	0.0348342		P09488
C-1-tetrahydrofolate synthase, cytoplasmic;Methylenetetrahydrofolate dehydrogenase;Methenyltetrahydrofolate cyclohydrolase;Formyltetrahydrofolate synthetase;Methylenetetrahydrofolate dehydrogenase (NADP+ dependent) 1, methenyltetrahydrofolate cyclohydrolase, formyltetrahydrofolate synthetase, isoform CRA_a;cDNA, FLJ92681, Homo sapiens methylenetetrahydrofolate dehydrogenase (NADP+dependent), meth…	MTHFD1;MTHFC;MTHFD;hCG_41677	P11586;B2R5Y2	1	0.519063	0.275843	0.0432672	0.0349411		P11586
Carbonic anhydrase 4;Carbonic anhydrase IV;Carbonate dehydratase IV;CA4 protein;cDNA FLJ76600, highly similar to Homo sapiens carbonic anhydrase IV (CA4), mRNA;Carbonic anhydrase IV, isoform CRA_b	CA4;hCG_1748066	P22748;Q6FHI7	1	5.44624	0.430513	2.04749	0.0351404		P22748
Annexin A6;Annexin-6;Annexin VI;Lipocortin VI;p68;p70;Protein III;Chromobindin-20;67 kDa calelectrin;Calphobindin-II;cDNA FLJ75116, highly similar to Homo sapiens annexin A6, transcript variant 1, mRNA;cDNA FLJ26567 fis, clone LNF05260, highly similar to Annexin VI	ANXA6;ANX6	P08133;A8K3Q7;Q6ZP35	1	0.411392	0.118464	0.168173	0.0352118		P08133
Protein arginine N-methyltransferase 5;Histone-arginine N-methyltransferase PRMT5;Shk1 kinase-binding protein 1 homolog;SKB1Hs;Jak-binding protein 1;72 kDa ICln-binding protein;cDNA, FLJ96564, highly similar to Homo sapiens SKB1 homolog (S. pombe) (SKB1), mRNA;Protein arginine methyltransferase 5 isoform a (Protein arginine methyltransferase 5, isoform CRA_b);cDNA FLJ90770 fis, clone THYRO1000866…	PRMT5;HRMT1L5;IBP72;JBP1;SKB1;hCG_41976	O14744;B2RDD7;B5BU10;A8MZ91;B4DV00;B4DX49;B4DY30;A8MTP3	1	0.192589	0.412054	0.203646	0.0352484		O14744
Myoglobin;cDNA, FLJ94722, highly similar to Homo sapiens myoglobin (MB), mRNA;cDNA FLJ55163, highly similar to Myoglobin;MB protein	MB;RP4-569D19.7-003;RP4-569D19.7-002	P02144;B2RA67;B0QYF8;B4DUI1;Q8WVH6;B0QYU8	1	4.53633	0.938454	0.79803	0.0352624		P02144
Glucose-6-phosphate isomerase;Phosphoglucose isomerase;Phosphohexose isomerase;Autocrine motility factor;Neuroleukin;Sperm antigen 36	GPI	B4DE36;B4DG39;P06744;B4DVJ0	1	0.571154	0.0696676	0.163987	0.0352836		B4DE36
cDNA FLJ78372, highly similar to Homo sapiens alpha-1-B glycoprotein (A1BG), mRNA;Alpha-1B-glycoprotein;Alpha-1-B glycoprotein	A1BG	A8K052;Q68CK0;P04217	1	5.00939	0.368207	2.26085	0.0353055		A8K052
Cytochrome c1, heme protein, mitochondrial;Ubiquinol-cytochrome-c reductase complex cytochrome c1 subunit;Cytochrome b-c1 complex subunit 4;Complex III subunit 4;Complex III subunit IV;Putative uncharacterized protein	CYC1	P08574;Q8TBT6	1	3.01428	0.435567	0.5483	0.0353976		P08574
General vesicular transport factor p115;Protein USO1 homolog;Transcytosis-associated protein;Vesicle-docking protein;Putative uncharacterized protein DKFZp451D234	USO1;VDP;DKFZp451D234	O60763;B2RAQ0;Q86TB8	1	0.665635	0.151774	0.240605	0.0354335		O60763
High mobility group protein B3;High mobility group protein 4;High mobility group protein 2a;Non-histone chromosomal protein;High mobility group protein B3-like-1;High-mobility group protein 4-like	HMGB3;HMG2A;HMG4;HMGB3L1;HMG4L	O15347;Q16466;Q3SYE8	1	0	0.487547	0	0.0354548		O15347
Beta-hexosaminidase subunit alpha;N-acetyl-beta-glucosaminidase subunit alpha;Beta-N-acetylhexosaminidase subunit alpha;cDNA FLJ60630, highly similar to Beta-hexosaminidase alpha chain (EC 3.2.1.52);cDNA FLJ53927, highly similar to Beta-hexosaminidase alpha chain (EC 3.2.1.52);HEXA protein;cDNA FLJ50884, highly similar to Beta-hexosaminidase alpha chain (EC 3.2.1.52)	HEXA	P06865;B4DKE7;B4DVA7;Q53HS8;Q6AI32;Q6PJ76;Q9BVJ8;B4DVL8	1	0.603354	0.573987	0.610819	0.035524		P06865
Kininogen-1;High molecular weight kininogen;Williams-Fitzgerald-Flaujeac factor;Fitzgerald factor;Alpha-2-thiol proteinase inhibitor;Kininogen-1 heavy chain;T-kinin;Ile-Ser-Bradykinin;Bradykinin;Kallidin I;Lysyl-bradykinin;Kallidin II;Kininogen-1 light chain;Low molecular weight growth-promoting factor;cDNA FLJ56836, highly similar to Kininogen-1;Kininogen 1, isoform CRA_b;cDNA FLJ53075, highly s…	KNG1;BDK;KNG;hCG_2021397	P01042-1;P01042;B4E1C2;P01042-2;A8K474;B2RCR2;B4DPP8;Q53EQ0;Q6PAU9;Q05CF8	1	3.26288	0.15058	1.093	0.0355307		P01042
Fat storage-inducing transmembrane protein 2;Fat-inducing protein 2	FITM2;C20orf142;FIT2	Q8N6M3	1	6.23136	0.338589	2.80385	0.0357817		Q8N6M3
E3 ubiquitin-protein ligase UBR4;N-recognin-4;Zinc finger UBR1-type protein 1;Retinoblastoma-associated factor of 600 kDa;600 kDa retinoblastoma protein-associated factor;RBAF600;p600;cDNA FLJ10371 fis, clone NT2RM2001903, highly similar to Homo sapiens ubiquitin protein ligase E3 component n-recognin 4 (UBR4), mRNA;cDNA FLJ12511 fis, clone NT2RM2001727, highly similar to Homo sapiens ubiquitin p…	UBR4;KIAA0462;KIAA1307;RBAF600;ZUBR1	Q5T4S7-2;Q5T4S7;Q5T4S7-1;Q5T4S7-4;Q5T4S7-3;B3KM62;B3KMT2;B4DYV5;Q96HY5	1	0.349901	0.303114	0.12025	0.0358407		Q5T4S7
Dystonin;Bullous pemphigoid antigen 1, isoforms 6/9/10;Trabeculin-beta;Hemidesmosomal plaque protein;Dystonia musculorum protein;DST protein;Putative uncharacterized protein CATX-15;Bullous pemphigoid antigen 1, isoform 7	DST;RP3-361I14.2-004;RP3-361I14.2-001;BPAG1;DMH;DT;KIAA0728;CATX-15;RP3-361I14.2-011	Q5TBT2;Q5TBT1;O94833-2;O94833;O94833-3;Q86T18;Q9HDA7;Q8WXK8;Q5TF24	1	1.52778	0.672128	0.866854	0.0358817		Q5TBT2
UPF0555 protein KIAA0776;KIAA0776 protein;cDNA FLJ51863	KIAA0776	O94874;A0PJ53;B4DJ57	1	0.151486	0.176396	0.262382	0.0359224		O94874
78 kDa glucose-regulated protein;GRP 78;Heat shock 70 kDa protein 5;Immunoglobulin heavy chain-binding protein;Endoplasmic reticulum lumenal Ca(2+)-binding protein grp78;Heat shock 70kDa protein 5 (Glucose-regulated protein, 78kDa);Heat shock 70kDa protein 5 (Glucose-regulated protein, 78kDa), isoform CRA_a;cDNA FLJ60062, highly similar to 78 kDa glucose-regulated protein;HSPA5 protein	HSPA5;GRP78;RP11-65N13.5-001;hCG_29661	P11021;B0QZ61;B4DEF7;Q2KHP4	1	0.603603	0.185436	0.118463	0.0360753		P11021
Stathmin;Phosphoprotein p19;Leukemia-associated phosphoprotein p18;Oncoprotein 18;pp17;Prosolin;Metablastin;Protein Pr22	STMN1;LAP18;OP18;hCG_23745;RP1-125I3.5-006;RP1-125I3.5-004	P16949;B2R4E7;B5BU83;Q96CE4;A2A2D2;A2A2D0;Q59G27	1	0	0.492515	0	0.0361043		P16949
Cytochrome c oxidase subunit 5A, mitochondrial;Cytochrome c oxidase polypeptide Va;Cytochrome c oxidase subunit Va	COX5A	P20674;Q71UP1	1	2.67552	0.16048	0.914163	0.0361382		P20674
Reticulocalbin-1;Proliferation-inducing gene 20 protein	RCN1;RCN	Q15293;Q5J7V8	1	0	0.492885	0	0.0361528		Q15293
Adipophilin;Adipose differentiation-related protein;cDNA FLJ57380, highly similar to Adipophilin;ADFP protein;Adipose differentiation-related protein, isoform CRA_b;cDNA, FLJ93444, highly similar to Homo sapiens adipose differentiation-related protein (ADFP), mRNA	ADFP;RP11-151J10.1-007;hCG_28271	Q99541;B4DJK9;Q6FHZ7	1	0	0.493744	0	0.0362655		Q99541
NADH dehydrogenase [ubiquinone] iron-sulfur protein 6, mitochondrial;NADH-ubiquinone oxidoreductase 13 kDa-A subunit;Complex I-13kD-A;NDUFS6 protein;cDNA FLJ12441 fis, clone NT2RM1000132, highly similar to NADH-ubiquinone oxidoreductase 13 kDa-A subunit, mitochondrial (EC 1.6.5.3);NADH dehydrogenase (Ubiquinone) Fe-S protein 6, 13kDa (NADH-coenzyme Q reductase), isoform CRA_a	NDUFS6;hCG_21432	O75380;Q6IBC4	1	2.94598	0.291904	1.0141	0.0363026		O75380
AP-2 complex subunit alpha-1;Adapter-related protein complex 2 alpha-1 subunit;Adaptor protein complex AP-2 subunit alpha-1;Alpha1-adaptin;Plasma membrane adaptor HA2/AP2 adaptin alpha A subunit;Alpha-adaptin A;Clathrin assembly protein complex 2 alpha-A large chain;100 kDa coated vesicle protein A;cDNA FLJ36998 fis, clone BRACE2007295, highly similar to ALPHA-ADAPTIN A	AP2A1;ADTAA;CLAPA1	O95782-1;O95782;Q8N9K4;O95782-2	1	0.221805	0.201604	0.216512	0.0363926		O95782
cDNA FLJ55422, highly similar to Septin-9;Ovarian/Breast septin epsilon;cDNA FLJ54900, highly similar to Septin-9;cDNA FLJ54882, highly similar to Septin-9;Septin 9, isoform CRA_b;cDNA FLJ75490, highly similar to Homo sapiens septin 9, mRNA;Septin 9, isoform CRA_f;cDNA FLJ31933 fis, clone NT2RP7006304, highly similar to Septin-9	Ov/Br septin;SEPT9;hCG_1986631	B4DTL7;Q96QF2;B4E274;B4DTL9;A8K2V3;B3KPM0	1	0.200661	0.24685	0.194733	0.0363934		B4DTL7
cDNA FLJ59461, highly similar to Pyruvate dehydrogenase E1 component alpha subunit, somatic form, mitochondrial (EC 1.2.4.1);Mitochondrial PDHA1;Pyruvate dehydrogenase (Lipoamide) alpha 1;Pyruvate dehydrogenase E1-alpha-subunit;Pyruvate dehydrogenase E1 component subunit alpha, somatic form, mitochondrial;PDHE1-A type I;PDHA1;cDNA, FLJ92558, highly similar to Homo sapiens pyruvate dehydrogenase (…	PDHA1;RP11-723P2.1-009;PHE1A;RP11-723P2.1-004;hCG_17571;PDHA1/LOC79064	A5YVE9;Q5JPU1;Q99725;P08559;A5YPB6;B2R5P7;Q53GE3;Q53H41;Q5JPT8;A5PHJ9	1	2.21426	0.372175	0.424977	0.0364564		A5YVE9
Mitochondrial fission 1 protein;Fis1 homolog;Tetratricopeptide repeat protein 11;TPR repeat protein 11	FIS1;TTC11;CGI-135	Q9Y3D6	1	0.343547	0.449258	0.59504	0.0364698		Q9Y3D6
Nucleoprotein TPR;TPR protein;Tpr protein;Tpr	TPR;Tpr;tpr	P12270;A0PJC9;Q15624;Q504U6;Q58F23;Q99968;Q9UE33	1	0	0.495311	0	0.0364714		P12270
Pleckstrin homology domain-containing family A member 7;cDNA FLJ54499, highly similar to Homo sapiens pleckstrin homology domain containing, family A member 7 (PLEKHA7), mRNA;cDNA FLJ54484, highly similar to Homo sapiens pleckstrin homology domain containing, family A member 7 (PLEKHA7), mRNA	PLEKHA7	Q6IQ23-2;Q6IQ23;Q6IQ23-1;B4DK33;B4DWC3	1	0	0.495878	0	0.0365461		Q6IQ23
6-phosphogluconolactonase	PGLS	O95336	1	0.58361	0.138283	0.122618	0.0365782		O95336
Retinal dehydrogenase 2;Aldehyde dehydrogenase family 1 member A2;Retinaldehyde-specific dehydrogenase type 2;cDNA FLJ55560, highly similar to Retinal dehydrogenase 2 (EC 1.2.1.36);cDNA FLJ59801, highly similar to Retinal dehydrogenase 2 (EC 1.2.1.36);RALDH2-T	ALDH1A2;RALDH2	O94788-1;O94788;B4DH89;B4DZR2;O94788-2;Q9UED3	1	0	0.497072	0	0.0367034		O94788
Phosphoglucomutase-like protein 5;Phosphoglucomutase-related protein;Aciculin;Phosphoglucomutase 5	PGM5;PGMRP;RP11-274B18.5-004	Q15124-1;Q15124;Q15124-2;B1AM46	1	1.37214	0.0712577	0.114212	0.0367552		Q15124
ATP-dependent RNA helicase DDX3X;DEAD box protein 3, X-chromosomal;Helicase-like protein 2;DEAD box, X isoform;DEAD (Asp-Glu-Ala-Asp) box polypeptide 3, X-linked;cDNA FLJ76819, highly similar to Homo sapiens DEAD (Asp-Glu-Ala-Asp) box polypeptide 3, X-linked (DDX3X), transcript variant 2, mRNA;HCG19318, isoform CRA_a;cDNA FLJ60399, highly similar to ATP-dependent RNA helicase DDX3X (EC 3.6.1.-);D…	DDX3X;DBX;DDX3;RP1-169I5.3-001;hCG_19318	O00571;A8K538;B4E3E8;B5BTY4;Q59GX6;Q5S4N1;B4DLU5	1	0.612823	0.404325	0.425004	0.0367919		O00571
Ubiquitin-conjugating enzyme E2 K;Ubiquitin-conjugating enzyme E2-25 kDa;Ubiquitin-protein ligase;Ubiquitin carrier protein;Huntingtin-interacting protein 2;cDNA FLJ57995, moderately similar to Ubiquitin-conjugating enzyme E2-25 kDa (EC 6.3.2.19);cDNA FLJ36214 fis, clone THYMU2000672, highly similar to Ubiquitin-conjugating enzyme E2-25 kDa (EC 6.3.2.19);Huntingtin interacting protein 2, isoform …	UBE2K;HIP2;LIG;hCG_38552	P61086-1;P61086;B4DIZ2;P61086-2;A8K5Y9;B3KSH4	1	0	0.497979	0	0.0368229		P61086
Serine beta-lactamase-like protein LACTB, mitochondrial	LACTB;MRPL56;UNQ843/PRO1781	P83111-1;P83111	1	2.2221	0.632765	1.20973	0.0368905		P83111
Multifunctional protein ADE2;Phosphoribosylaminoimidazole-succinocarboxamide synthase;SAICAR synthetase;Phosphoribosylaminoimidazole carboxylase;AIR carboxylase;Putative uncharacterized protein DKFZp781N1372	PAICS;ADE2;AIRC;PAIS;DKFZp781N1372	P22234;B4DGX3;Q68CQ5	1	0.259501	0.296278	0.266344	0.0370592		P22234
Calcium-regulated heat stable protein 1;Calcium-regulated heat-stable protein of 24 kDa;Calcium regulated heat stable protein 1, 24kDa, isoform CRA_a;cDNA, FLJ92038, highly similar to Homo sapiens calcium regulated heat stable protein 1, 24kDa (CARHSP1), mRNA	CARHSP1;hCG_15404	Q9Y2V2;B2R4C3	1	0	0.499868	0	0.0370724		Q9Y2V2
Dynamin-2;cDNA FLJ78533, highly similar to Homo sapiens dynamin 2 (DNM2), transcript variant 4, mRNA;cDNA FLJ56447, highly similar to Dynamin-2 (EC 3.6.5.5);cDNA FLJ40556 fis, clone THYMU2002583, highly similar to DYNAMIN 2;Dynamin II (AA 474-866] [Homo sapiens]);Dynamin 2 isoform 4 variant	DNM2;DYN2	P50570-1;P50570;A8K1B6;P50570-2;B4DJ53;Q8N1K8;Q9UPH5;Q59G96	1	0.607352	0.121355	0.0775255	0.037128		P50570
UPF0366 protein C11orf67	C11orf67;PTD015	Q9H7C9-1;Q9H7C9	1	4.75297	0.396193	1.6246	0.0371923		Q9H7C9
60S ribosomal protein L18;Ribosomal protein L18	RPL18	Q07020;Q0QEW2;B4DDY5	1	0.305567	0.226725	0.136551	0.0372115		Q07020
Vacuolar protein sorting-associated protein 35;Vesicle protein sorting 35;Maternal-embryonic 3;Vacuolar protein sorting 35 variant;Putative uncharacterized protein DKFZp686O2462	VPS35;MEM3;TCCCTA00141;DKFZp686O2462	Q96QK1;Q53FR4;Q5HYM2	1	0.516057	0.325577	0.11139	0.0373023		Q96QK1
Beta-sarcoglycan;43 kDa dystrophin-associated glycoprotein;A3b;cDNA FLJ75413, highly similar to Homo sapiens sarcoglycan, beta (43kDa dystrophin-associated glycoprotein) (SGCB), mRNA;Sarcoglycan, beta (43kDa dystrophin-associated glycoprotein);Sarcoglycan, beta (43kDa dystrophin-associated glycoprotein), isoform CRA_a;SGCB protein	SGCB;hCG_20638	Q16585;Q5U0N0;Q6IBJ4	1	1.91276	0.38918	0.104086	0.037379		Q16585
UPF0468 protein C16orf80;Transcription factor IIB;cDNA FLJ58848, highly similar to Homo sapiens transcription factor IIB	C16orf80	Q9Y6A4;B4DN94	1	0	0.502585	0	0.0374324		Q9Y6A4
cDNA FLJ53615, highly similar to Fibromodulin;Fibromodulin;Collagen-binding 59 kDa protein;Keratan sulfate proteoglycan fibromodulin;cDNA FLJ35580 fis, clone SPLEN2006389, highly similar to FIBROMODULIN	FMOD;FM;SLRR2E	B4E1J3;Q12833;Q8IV47;Q06828;B3KS64	1	0.451558	0.622439	0.782122	0.0374913		B4E1J3
Putative uncharacterized protein NUDT5;ADP-sugar pyrophosphatase;Nucleoside diphosphate-linked moiety X motif 5;YSA1H;Nudix (Nucleoside diphosphate linked moiety X)-type motif 5, isoform CRA_c;cDNA FLJ76398, highly similar to Homo sapiens nudix (nucleoside diphosphate linked moiety X)-type motif 5 (NUDT5), mRNA	NUDT5;HSPC115;hCG_2017710	A6NFX8;Q9UKK9;A8K516;A6NJU6;A6NHE8	1	0	0.503194	0	0.0375131		A6NFX8
Phosphoglycerate kinase 1;Primer recognition protein 2;Cell migration-inducing gene 10 protein;Phosphoglycerate kinase	PGK1;PGKA;MIG10;OK/SW-cl.110;hCG_20034	P00558;A8K4W6;B4DHM5;B4E1H9;B4DHB3	1	0.704331	0.0710315	0.0879264	0.0377893		P00558
D-beta-hydroxybutyrate dehydrogenase, mitochondrial;3-hydroxybutyrate dehydrogenase	BDH1;BDH	Q02338;A1E284	1	2.71469	0.468274	1.01312	0.0378146		Q02338
Putative uncharacterized protein MRPS36;28S ribosomal protein S36, mitochondrial;MRP-S36	MRPS36;DC47	A8MWD6;P82909	1	2.20159	0.11903	0.715382	0.0378572		A8MWD6
ATP-citrate synthase;ATP-citrate (pro-S-)-lyase;Citrate cleavage enzyme;cDNA FLJ56442, highly similar to ATP-citrate synthase (EC 2.3.3.8);cDNA FLJ55447, highly similar to ATP-citrate synthase (EC 2.3.3.8);ACLY variant protein;cDNA FLJ37765 fis, clone BRHIP2024742, highly similar to ATP-CITRATE	ACLY;ACLY variant protein	P53396;B4DIM0;B4E3P0;Q4LE36;Q8N9C4	1	0.214336	0.519961	0.185646	0.037911		P53396
C4b-binding protein alpha chain;Proline-rich protein;cDNA FLJ51597, highly similar to C4b-binding protein alpha chain;cDNA FLJ51598, highly similar to C4b-binding protein alpha chain;Complement component 4 binding protein, alpha;Complement component 4 binding protein, alpha, isoform CRA_c;cDNA, FLJ93660, Homo sapiens complement component 4 binding protein, alpha (C4BPA),mRNA;Putative uncharacteri…	C4BPA;C4BP;RP11-164O23.4-001;hCG_1986997	P04003;B4E1D8;B4E1E1;Q5VVQ8;A8MVU6	1	9.22668	0.326392	4.47907	0.0381069		P04003
Serine/threonine-protein kinase mTOR;Mammalian target of rapamycin;FKBP12-rapamycin complex-associated protein;FK506-binding protein 12-rapamycin complex-associated protein 1;Rapamycin target protein;RAPT1;cDNA FLJ44809 fis, clone BRACE3044172, highly similar to FKBP12-rapamycin complex-associated protein;cDNA FLJ60991, highly similar to FKBP12-rapamycin complex-associated protein;cDNA FLJ56559, …	FRAP1;FRAP;FRAP2;FRAP1 variant protein;RP4-635E18.1-002	P42345;B3KX59;B4DZD5;B4E2H2;Q4LE76;Q96QW8;B1AKP8	1	0	0.507727	0	0.0381164		P42345
Phosphate carrier protein, mitochondrial;Phosphate transport protein;Solute carrier family 25 member 3;cDNA FLJ35370 fis, clone SKMUS2001693, highly similar to Phosphate carrier protein, mitochondrial;Solute carrier family 25 (Mitochondrial carrier; phosphate carrier), member 3, isoform CRA_b;cDNA, FLJ96465, highly similar to Homo sapiens solute carrier family 25 (mitochondrial carrier;phosphate …	SLC25A3;PHC;OK/SW-cl.48;hCG_36721	Q00325-1;Q00325;B3KS34;Q00325-2;B2RE88;Q53HC3;Q7Z7N7;Q8NCF7	1	1.95167	0.186612	0.353563	0.0381392		Q00325
Tumor protein D54;Tumor protein D52-like 2;Tumor protein D52-like 2, isoform CRA_c;cDNA FLJ30506 fis, clone BRAWH2000522, highly similar to Homo sapiens tumor protein D52-like 2 (TPD52L2), transcript variant 4, mRNA;Tumor protein D52-like 2, isoform CRA_b;cDNA FLJ53635, highly similar to Homo sapiens tumor protein D52-like 2 (TPD52L2), transcript variant 6, mRNA;HCCR-binding protein 2;Putative un…	TPD52L2;RP4-591C20.2-001;hCG_22755;RP4-591C20.2-006;DKFZp686A1765;RP4-591C20.2-005	O43398;Q5JWU5;Q5JWU8;O43399-2;O43399;B4DPJ6;Q5J908;Q68E05	1	0.306524	0.228301	0.254614	0.0381478		O43398
26S protease regulatory subunit 7;Proteasome 26S subunit ATPase 2;Protein MSS1;Proteasome (Prosome, macropain) 26S subunit, ATPase, 2;Proteasome (Prosome, macropain) 26S subunit, ATPase, 2, isoform CRA_b;Putative uncharacterized protein Nbla10058;Putative uncharacterized protein PSMC2	PSMC2;MSS1;hCG_18195;tcag7.887;Nbla10058	P35998;A4D0Q1;Q3LIA5;Q75L23	1	0.602697	0.116095	0.1006	0.0381861		P35998
Pyruvate dehydrogenase E1 component subunit beta, mitochondrial;Pyruvate dehydrogenase (Lipoamide) beta, isoform CRA_a;cDNA, FLJ93492, highly similar to Homo sapiens pyruvate dehydrogenase (lipoamide) beta (PDHB), mRNA;cDNA FLJ52988, highly similar to Pyruvate dehydrogenase E1 component subunit beta, mitochondrial (EC 1.2.4.1)	PDHB;PHE1B;hCG_27731	P11177-1;P11177;B2R7L0;P11177-2;B4DDD7	1	1.825	0.49871	0.575744	0.0385168		P11177
Nck-associated protein 1;p125Nap1;Membrane-associated protein HEM-2;cDNA FLJ11291 fis, clone PLACE1009659, highly similar to Nck-associated protein 1	NCKAP1;HEM2;KIAA0587;NAP1	Q9Y2A7;B3KMK7;Q53QN5;Q53S94;Q53Y35	1	0.187899	0.320474	0.32545	0.038528		Q9Y2A7
Splicing factor 3B subunit 3;Spliceosome-associated protein 130;Pre-mRNA-splicing factor SF3b 130 kDa subunit;STAF130;cDNA FLJ78677, highly similar to Homo sapiens splicing factor 3b, subunit 3, 130kDa (SF3B3), mRNA;cDNA FLJ10435 fis, clone NT2RP1000493, highly similar to Splicing factor 3B subunit 3;cDNA FLJ90452 fis, clone NT2RP3001475, highly similar to Splicing factor 3B subunit 3	SF3B3;KIAA0017;SAP130	Q15393-1;Q15393;A8K6V3;B3KM77;B3KQH1	1	0.546096	0.395599	0.198056	0.0385413		Q15393
40S ribosomal protein S6;Phosphoprotein NP33;Ribosomal protein S6;cDNA FLJ78049, highly similar to Homo sapiens ribosomal protein S6 (RPS6), mRNA;Ribosomal protein S6, isoform CRA_e;cDNA, FLJ92127, Homo sapiens ribosomal protein S6 (RPS6), mRNA;Ribosomal protein S6, isoform CRA_a	RPS6;OK/SW-cl.2;RP11-513M16.6-001;hCG_1741512;RP11-513M16.6-004;RP11-513M16.6-002	P62753;A2A3R6;Q96DV6;A2A3R7;A2A3R5	1	0.140857	0.307783	0.132995	0.0385415		P62753
Tubulointerstitial nephritis antigen-like;Tubulointerstitial nephritis antigen-related protein;Glucocorticoid-inducible protein 5;Oxidized LDL-responsive gene 2 protein;cDNA FLJ77636, highly similar to Homo sapiens tubulointerstitial nephritis antigen-like 1 (TINAGL1), mRNA;Tubulointerstitial nephritis antigen-like 1, isoform CRA_b;cDNA FLJ53214, highly similar to Tubulointerstitial nephritis ant…	TINAGL1;GIS5;LCN7;OLRG2;TINAGL;PP6614;PSEC0088;UNQ204/PRO230;hCG_41620	Q9GZM7-1;Q9GZM7;A8K9Q5;B4DVG5;B4DPK6	1	2.68088	0.962119	0.268756	0.0387405		Q9GZM7
Lymphokine-activated killer T-cell-originated protein kinase;T-LAK cell-originated protein kinase;PDZ-binding kinase;Spermatogenesis-related protein kinase;MAPKK-like protein kinase;Nori-3;Cancer/testis antigen 84;cDNA FLJ58333, highly similar to T-lymphokine-activated killer cell-originated protein kinase (EC 2.7.12.2)	PBK;TOPK	Q96KB5;B4DX68	1	0	0.512502	0	0.0387552		Q96KB5
Interleukin enhancer-binding factor 2;Nuclear factor of activated T-cells 45 kDa;cDNA FLJ51660, highly similar to Interleukin enhancer-binding factor 2;Interleukin enhancer binding factor 2 variant	ILF2;NF45;PRO3063	Q12905;B4DY09;Q53FG3	1	0.193922	0.399099	0.0353796	0.038782		Q12905
Splicing factor, arginine/serine-rich 1;pre-mRNA-splicing factor SF2, P33 subunit;Alternative-splicing factor 1;cDNA FLJ77645, highly similar to Homo sapiens splicing factor, arginine/serine-rich 1 (splicing factor 2, alternate splicing factor) (SFRS1), mRNA;Splicing factor, arginine/serine-rich 1 (Splicing factor 2, alternate splicing factor), isoform CRA_a;cDNA, FLJ93198, Homo sapiens splicing …	SFRS1;ASF;SF2;SF2P33;OK/SW-cl.3;hCG_1774411	Q07955-1;Q07955;A8K1L8;B2R6Z7;Q07955-2;Q07955-3;Q59FA2	1	0.0493932	0.44609	0.0855515	0.0387873		Q07955
Poly(rC)-binding protein 1;Alpha-CP1;Nucleic acid-binding protein SUB2.3;Poly(RC) binding protein 1;Putative uncharacterized protein PCBP1;cDNA, FLJ94964, highly similar to Homo sapiens poly(rC) binding protein 1 (PCBP1), mRNA	PCBP1;hCG_1776997	Q15365;Q53SS8	1	0.373682	0.344048	0.0951873	0.0388917		Q15365
Tumor suppressor p53-binding protein 1;Putative uncharacterized protein TP53BP1;cDNA FLJ78617;cDNA FLJ41424 fis, clone BRHIP2003748, highly similar to Tumor suppressor p53-binding protein 1	TP53BP1	Q12888-2;Q12888;Q12888-1;A6NNK5;A8KA50;B3KVT9	1	0	0.513682	0	0.0389135		Q12888
Emerin;EMD protein;Emerin (Emery-Dreifuss muscular dystrophy), isoform CRA_a;Emerin (Emery-Dreifuss muscular dystrophy), isoform CRA_b	EMD;EDMD;STA;XX-FW88778H2.1-001;hCG_41343;XX-FW88778H2.1-010	P50402;Q6FI02;Q5HY57	1	0	0.513689	0	0.0389144		P50402
Transcription elongation factor B polypeptide 1;RNA polymerase II transcription factor SIII subunit C;SIII p15;Elongin 15 kDa subunit;Elongin-C	TCEB1	Q15369	1	0.333323	0.360729	0.161232	0.0391062		Q15369
Isobutyryl-CoA dehydrogenase, mitochondrial;Acyl-CoA dehydrogenase family member 8;Activator-recruited cofactor 42 kDa component;cDNA FLJ90159 fis, clone HEMBB1002465, weakly similar to ACYL-COA DEHYDROGENASE (EC 1.3.99.-);Acyl-Coenzyme A dehydrogenase family, member 8, isoform CRA_a;Acyl-Coenzyme A dehydrogenase family, member 8 variant	ACAD8;ARC42;IBD;hCG_37259	Q9UKU7;Q6ZWP6;Q59FC2	1	2.01163	0.416854	0.625348	0.0391686		Q9UKU7
Nucleoside diphosphate kinase A;Tumor metastatic process-associated protein;Metastasis inhibition factor nm23;nm23-H1;Granzyme A-activated DNase	NME1;NDPKA;NM23	Q86XQ2;P15531;Q6FGK3	1	0.241256	0.535407	0.21539	0.0391835		Q86XQ2
U1 small nuclear ribonucleoprotein A;cDNA, FLJ93681, highly similar to Homo sapiens small nuclear ribonucleoprotein polypeptide A (SNRPA), mRNA	SNRPA	P09012;B2R802	1	0	0.516093	0	0.0392376		P09012
Annexin A3;Annexin-3;Annexin III;Lipocortin III;Placental anticoagulant protein III;35-alpha calcimedin;Inositol 1,2-cyclic phosphate 2-phosphohydrolase;Annexin A3, isoform CRA_a;cDNA, FLJ94587, Homo sapiens annexin A3 (ANXA3), mRNA;Putative uncharacterized protein ANXA3	ANXA3;ANX3;hCG_24350	P12429;B2R9W6;A6NLK4	1	0.374777	0.319163	0.0617174	0.0393635		P12429
Protein arginine N-methyltransferase 1;Interferon receptor 1-bound protein 4;cDNA FLJ55610, highly similar to Protein arginine N-methyltransferase 1 (EC 2.1.1.-);PRMT1 protein;Protein arginine methyltransferase 1 isoform 4;cDNA FLJ60588, highly similar to Protein arginine N-methyltransferase 1 (EC 2.1.1.-)	PRMT1;HMT2;HRMT1L2;IR1B4	Q99873-1;Q99873;B4E3C3;Q8WUW5;Q99873-2;Q6LEU5;Q99873-3;Q5U8W9;B4DJ87	1	0	0.517164	0	0.0393819		Q99873
Short/branched chain specific acyl-CoA dehydrogenase, mitochondrial;2-methyl branched chain acyl-CoA dehydrogenase;2-methylbutyryl-coenzyme A dehydrogenase;cDNA FLJ57418, highly similar to Short/branched chain specific acyl-CoAdehydrogenase, mitochondrial (EC 1.3.99.-);Acyl-Coenzyme A dehydrogenase, short/branched chain;cDNA, FLJ94986, Homo sapiens acyl-Coenzyme A dehydrogenase, short/branched ch…	ACADSB;RP11-162A23.1-001;hCG_1781685	P45954;B4DQ51;Q5SQN6	1	3.47645	0.0249428	1.25994	0.0394345		P45954
Cytochrome b-c1 complex subunit 6, mitochondrial;Ubiquinol-cytochrome c reductase complex 11 kDa protein;Cytochrome c1 non-heme 11 kDa protein;Mitochondrial hinge protein;Complex III subunit VIII;Complex III subunit 6;Ubiquinol-cytochrome c reductase hinge protein, isoform CRA_a;cDNA, FLJ92239, highly similar to Homo sapiens ubiquinol-cytochrome c reductase hinge protein (UQCRH), mRNA;UQCRH prote…	UQCRH;hCG_22091	P07919;B2R4V9;Q567R0	1	2.38864	0.533916	0.248708	0.0394346		P07919
Putative uncharacterized protein USP14;Ubiquitin carboxyl-terminal hydrolase;Ubiquitin carboxyl-terminal hydrolase 14;Ubiquitin thioesterase 14;Ubiquitin-specific-processing protease 14;Deubiquitinating enzyme 14;cDNA FLJ38197 fis, clone FCBBF1000367, highly similar to Ubiquitin carboxyl-terminal hydrolase 14 (EC 3.1.2.15)	USP14;TGT	A8MYA5;B2RD79;P54578;A6NJA2;B3KTG4	1	0.674156	0.0807253	0.241269	0.0396219		A8MYA5
CTP synthase 1;UTP--ammonia ligase 1;CTP synthetase 1;cDNA FLJ60075, highly similar to CTP synthase 1 (EC 6.3.4.2);cDNA FLJ59392, highly similar to CTP synthase 1 (EC 6.3.4.2);cDNA FLJ58563, highly similar to CTP synthase 1 (EC 6.3.4.2)	CTPS	P17812;B4DMB5;B4DR64;B4E1E0	1	0.0935917	0.383932	0.162106	0.0399085		P17812
Cell surface glycoprotein MUC18;Melanoma-associated antigen MUC18;Melanoma cell adhesion molecule;Melanoma-associated antigen A32;S-endo 1 endothelial-associated antigen;Cell surface glycoprotein P1H12;cDNA FLJ78619, highly similar to Homo sapiens melanoma cell adhesion molecule (MCAM), mRNA;cDNA, FLJ92775, highly similar to Homo sapiens melanoma cell adhesion molecule (MCAM), mRNA;cDNA FLJ46477 …	MCAM;MUC18	P43121-1;P43121;A8K6A6;B2R642;B3KXZ9;P43121-2	1	0.298692	0.284283	0.0814569	0.0399679		P43121
40S ribosomal protein S5;40S ribosomal protein S5, N-terminally processed;Ribosomal protein S5, isoform CRA_a;cDNA, FLJ92205, Homo sapiens ribosomal protein S5 (RPS5), mRNA;Ribosomal protein S5 variant	RPS5;hCG_201358	P46782;B2R4T2;Q53G25	1	0.144319	0.602592	0.171575	0.0400175		P46782
Protein disulfide-isomerase A4;Protein ERp-72;cDNA FLJ78033, highly similar to Homo sapiens protein disulfide isomerase family A, member 4, mRNA;Protein disulfide isomerase family A, member 4, isoform CRA_a;Putative uncharacterized protein ERP70	PDIA4;ERP70;ERP72;hCG_15300	P13667;A8K4K6;Q549T6	1	0.18439	0.475424	0.0576553	0.0402785		P13667
Full-length cDNA clone CS0DI019YF20 of Placenta of Homo sapiens (human)		Q86TT2	1	13.4984	0.121461	6.64038	0.0403435		Q86TT2
Heterogeneous nuclear ribonucleoprotein U-like protein 1;Adenovirus early region 1B-associated protein 5;E1B-55 kDa-associated protein 5;cDNA FLJ75163, highly similar to Homo sapiens heterogeneous nuclear ribonucleoprotein U-like 1 (HNRPUL1), transcript variant 4, mRNA;cDNA FLJ78309, highly similar to Homo sapiens heterogeneous nuclear ribonucleoprotein U-like 1 (HNRPUL1), transcript variant 1, m…	HNRNPUL1;E1BAP5;HNRPUL1;hCG_2039741	Q9BUJ2-1;Q9BUJ2;A8K3W4;A8K5K0;A8K6U7;B3KMW7;Q9BUJ2-2;Q9BUJ2-4;B3KM60;Q9BUJ2-3	1	0	0.524365	0	0.0403561		Q9BUJ2
Elongation factor 1-alpha 2;eEF1A-2;Statin S1;Eukaryotic translation elongation factor 1 alpha 2 variant	EEF1A2;EEF1AL;STN	Q05639;B5BUF3;Q59GP5	1	0.736453	0.361672	0.263149	0.0407165		Q05639
Transmembrane protein 43;Protein LUMA;FLJ00144 protein	TMEM43;UNQ2564/PRO6244;FLJ00144	Q9BTV4;Q8TEP9	1	0.179773	0.444535	0.156342	0.0407602		Q9BTV4
DAZ-associated protein 1;Deleted in azoospermia-associated protein 1;cDNA FLJ35575 fis, clone SPLEN2006143, highly similar to DAZ-associated protein 1	DAZAP1	Q96EP5-1;Q96EP5;B3KS63;Q96EP5-2	1	0	0.527814	0	0.0408253		Q96EP5
Cleavage and polyadenylation specificity factor subunit 5;Cleavage and polyadenylation specificity factor 25 kDa subunit;Pre-mRNA cleavage factor Im 25 kDa subunit;Nucleoside diphosphate-linked moiety X motif 21;cDNA, FLJ93125, highly similar to Homo sapiens cleavage and polyadenylation specific factor 5, 25 kDa(CPSF5), mRNA	NUDT21;CFIM25;CPSF25;CPSF5	O43809;B2R6U8	1	0	0.52861	0	0.0409337		O43809
Protein S100-A13;S100 calcium-binding protein A13	S100A13	Q99584	1	0.668851	0.17595	0.130289	0.0409443		Q99584
Hemopexin;Beta-1B-glycoprotein;HPX protein	HPX	P02790;Q9BS19	1	8.65636	0.659649	3.49726	0.0410052		P02790
Ribonucleoside-diphosphate reductase large subunit;Ribonucleoside-diphosphate reductase subunit M1;Ribonucleotide reductase large subunit;Ribonucleoside-diphosphate reductase;cDNA FLJ51133, highly similar to Ribonucleoside-diphosphate reductase large subunit (EC 1.17.4.1);cDNA FLJ51135, highly similar to Ribonucleoside-diphosphate reductase large subunit (EC 1.17.4.1)	RRM1;RR1	P23921;B4DNN4;B4DXB0;B4DXD1;B4E0I8;Q53GZ5;B4DS95	1	0	0.529263	0	0.0410229		P23921
Proteasome subunit alpha type-1;Proteasome component C2;Macropain subunit C2;Multicatalytic endopeptidase complex subunit C2;Proteasome nu chain;30 kDa prosomal protein;PROS-30;Proteasome subunit alpha type;Putative uncharacterized protein PSMA1	PSMA1;PROS30;PSC2;hCG_23437	P25786-2;P25786;P25786-1;A8K400;A8MVJ4;Q53YE8	1	0.730544	0.143104	0.100175	0.0412128		P25786
Putative uncharacterized protein GAA;Lysosomal alpha-glucosidase;Acid maltase;Aglucosidase alfa;76 kDa lysosomal alpha-glucosidase;70 kDa lysosomal alpha-glucosidase	GAA	A6NFM4;P10253	1	1.55323	0.866379	0.572486	0.041306		A6NFM4
Serine/threonine-protein kinase PAK 4;p21-activated kinase 4;cDNA FLJ76899, highly similar to Homo sapiens p21(CDKN1A)-activated kinase 4 (PAK4), mRNA;cDNA FLJ55049, highly similar to Serine/threonine-protein kinase PAK 4 (EC 2.7.11.1);cDNA FLJ58808, highly similar to Homo sapiens p21(CDKN1A)-activated kinase 4 (PAK4), transcript variant 4, mRNA;P21(CDKN1A)-activated kinase 4, isoform CRA_c;cDNA …	PAK4;KIAA1142;hCG_20282	O96013-1;O96013;A8K724;B4DE88;O96013-4;O96013-3;B4DGG6;B4DUG0;B4E3B5;O96013-2	1	0	0.532312	0	0.0414396		O96013
Arsenical pump-driving ATPase;Arsenite-translocating ATPase;Arsenical resistance ATPase;Arsenite-transporting ATPase	ASNA1;ARSA	O43681	1	0.326839	0.141058	0.29625	0.041492		O43681
Polypyrimidine tract binding protein 1;Polypyrimidine tract binding protein 1, isoform CRA_c;Polypyrimidine tract-binding protein 1;Heterogeneous nuclear ribonucleoprotein I;57 kDa RNA-binding protein PPTB-1;Polypyrimidine tract-binding protein 1 isoform c variant	PTBP1;hCG_20560;PTB	Q9BUQ0;P26599-2;P26599;P26599-1;Q59H49	1	0.0284009	0.476254	0.0491918	0.0415013		Q9BUQ0
40S ribosomal protein S27;Metallopan-stimulin 1;Ribosomal protein S27;Putative uncharacterized protein RPS27	RPS27;MPS1;RP11-422P24.3-001;hCG_1746747;hCG_1996850;hCG_2001249;LOC392748;tcag7.1276;RP11-422P24.3-002	P42677;Q5T4L6;A4D1G5;A8MWW4;Q5T4L4	1	0.117526	0.552479	0.116908	0.0415088		P42677
Coatomer subunit beta';Beta'-coat protein;p102;cDNA FLJ56271, highly similar to Coatomer subunit beta;Coatomer protein complex, subunit beta 2 (Beta prime), isoform CRA_b	COPB2;hCG_17220	P35606;B4DZI8	1	0.394206	0.440959	0.169371	0.0415089		P35606
Ubiquinol-cytochrome c reductase complex chaperone CBP3 homolog;Basic FGF-repressed Zic-binding protein;Ubiquinol-cytochrome c reductase complex chaperone;Ubiquinol-cytochrome c reductase complex chaperone, CBP3 homolog (Yeast);Chromosome 20 open reading frame 44, isoform CRA_g;Putative uncharacterized protein UQCC;cDNA FLJ59847, highly similar to Basic FGF-repressed Zic-binding protein	UQCC;BZFB;C20orf44;RP4-614O4.7-010;hCG_38219;RP4-614O4.7-003;RP4-614O4.7-007;RP4-614O4.7-018;RP4-614O4.7-006	Q9NVA1-1;Q9NVA1;Q3KRB6;Q9NVA1-4;Q9NVA1-2;B5MCA6;A6NJA7;B1AKV3;B1AKV6;B1AKV5;B5MCQ8;B1AKV4;B5MCM4;Q9NVA1-3	1	2.60212	0.239307	0.691333	0.0415328		Q9NVA1
Anamorsin;Cytokine-induced apoptosis inhibitor 1;cDNA FLJ77509;Cytokine induced apoptosis inhibitor 1, isoform CRA_b;Putative uncharacterized protein CIAPIN1;cDNA FLJ58887, highly similar to Anamorsin (Cytokine-induced apoptosis inhibitor 1) (CUA001)	CIAPIN1;CUA001;PRO0915;hCG_16498	Q6FI81-1;Q6FI81;Q6FI81-3;A8K8B6;A8MXX9;B4DHB9	1	0	0.533064	0	0.0415425		Q6FI81
Lumican;Keratan sulfate proteoglycan lumican;cDNA, FLJ93075, Homo sapiens lumican (LUM), mRNA;Lumican variant	LUM;LDC;SLRR2D;hCG_24108	P51884;B2R6R5;Q53FV4	1	2.50139	0.626566	1.33343	0.041596		P51884
Nuclear autoantigenic sperm protein;cDNA FLJ76872, highly similar to Homo sapiens nuclear autoantigenic sperm protein (histone-binding) (NASP), transcript variant 2, mRNA;Nuclear autoantigenic sperm protein (Histone-binding), isoform CRA_d;cDNA FLJ53158, highly similar to Nuclear autoantigenic sperm protein;cDNA FLJ53176, highly similar to Nuclear autoantigenic sperm protein;NASP protein;Nuclear …	NASP;hCG_40880	P49321-1;P49321;A8K6H2;B4DQP3;B4DS57;Q6PJY7;Q9P1N1;Q53H03;Q5T622	1	0	0.534196	0	0.0416977		P49321
Ig lambda chain V-III region LOI		P80748	1	6.97408	0.313311	3.17496	0.0417292		P80748
Enhanced at puberty protein 1	EAP1;C14orf4;KIAA1865;My039	Q9H1B7	1	0	0.534706	0	0.0417676		Q9H1B7
cDNA FLJ31747 fis, clone NT2RI2007377, highly similar to RNA-BINDING PROTEIN EWS;Ewing sarcoma breakpoint region 1, isoform CRA_h;RNA-binding protein EWS;EWS oncogene;Ewing sarcoma breakpoint region 1 protein;Ewing sarcoma breakpoint region 1;Ewing sarcoma breakpoint region 1, isoform CRA_f;EWSR1 protein;Ewing sarcoma breakpoint region 1, isoform CRA_b;Ewing sarcoma breakpoint region 1, isoform C…	EWSR1;hCG_2010995;EWS;AC002059.7-001;AC002059.7-002;AC002059.7-007;AC002059.7-008	Q96MX4;Q01844-1;Q01844;Q5THL0;Q96FE8;B0QYK0;B0QYK1;Q96MN4;Q01844-2	1	0	0.538339	0	0.0422669		Q96MX4
Cytochrome c oxidase subunit 1;Cytochrome c oxidase polypeptide I;Cytochrome oxidase subunit I	MT-CO1;COI;COXI;MTCO1;COX1;cox1;CO1	P00395;A0S183;A0S1I7;A0SCP2;A1DSF3;A1DTC8;A1DTW0;A1XP63;A3RMP9;A4ZL80;A4ZLB9;A5YMT3;A6NAM9;A6YTK8;A6YU66;A6YV28;A6YV54;A6YYA4;A6YYY8;A6YZK9;A6Z0P9;A6Z1V1;A6Z5Z1;A6Z6C1;A6Z6U0;A6ZA20;A6ZEY2;A6ZFK2;A6ZG99;A6ZGQ2;A7LEL7;A7LFE0;A7XSQ0;A8JLF0;B0Z6P8;B0Z6V0;B1NTV9;B1NUB5;B1NUS1;B1NVJ4;B1PI08;B1W8A6;B2CB36;B2KM44;B2XEY0;B2XGN6;B2XH81;B2XHY2;B2XI93;B2XJ80;B2XLA7;B2XLI5;B2XLJ8;B2XM03;B2XNF6;B2XPY6;B2Y9D8;…	1	0	0.538622	0	0.0423058		P00395
Vesicle-trafficking protein SEC22b;SEC22 vesicle-trafficking protein homolog B;SEC22 vesicle-trafficking protein-like 1;ERS24;ERS-24	SEC22B;SEC22L1	O75396	1	0.467857	0.207717	0.21797	0.0423714		O75396
60S ribosomal protein L27a;Ribosomal protein L27a;cDNA, FLJ92028, Homo sapiens ribosomal protein L27a (RPL27A), mRNA	RPL27A;hCG_23888;L27a	P46776;B2R4B3;Q6NZ52;Q9BQQ5	1	0.322455	0.332271	0.0545803	0.0423903		P46776
Nebulette;Actin-binding Z-disk protein;HCG21545, isoform CRA_d;Nebulette variant 3;Nebulette variant 7;NEBL protein;Nebulette variant 4	NEBL;hCG_21545	O76041;B0YJ45;Q2TBD1;B0YJ47	1	2.57055	0.426989	1.02211	0.0425919		O76041
40S ribosomal protein S16;Ribosomal protein S16, isoform CRA_c;cDNA, FLJ96562, Homo sapiens ribosomal protein S16 (RPS16), mRNA;cDNA FLJ56786, moderately similar to 40S ribosomal protein S16;RPS16 protein	RPS16;hCG_43353	P62249;B2RDD5;B4DP32;Q6IPX4	1	0.194056	0.424021	0.029098	0.0426158		P62249
Inositol monophosphatase;Inositol-1(or 4)-monophosphatase;Lithium-sensitive myo-inositol monophosphatase A1;Inositol(Myo)-1(Or 4)-monophosphatase 1, isoform CRA_a;cDNA, FLJ93260, Homo sapiens inositol(myo)-1(or 4)-monophosphatase 1 (IMPA1), mRNA;cDNA FLJ58981, highly similar to Inositol monophosphatase (EC 3.1.3.25)	IMPA1;IMPA;hCG_21302	P29218;B2R733;B4DLN3	1	1.39618	0.0645761	0.153574	0.0427706		P29218
Sodium/potassium-transporting ATPase subunit alpha-3;Na(+)/K(+) ATPase alpha-3 subunit;Na(+)/K(+) ATPase alpha(III) subunit;cDNA FLJ30174 fis, clone BRACE2000975, highly similar to Sodium/potassium-transporting ATPase alpha-3 chain (EC 3.6.3.9);cDNA FLJ37309 fis, clone BRAMY2016611, highly similar to Sodium/potassium-transporting ATPase alpha-3 chain (EC 3.6.3.9);cDNA FLJ16157 fis, clone BRAWH200…	ATP1A3	P13637;B3KNQ8;B3KSY7;B3KV59;Q58I21;Q53ES0	1	1.85766	0.108493	0.542989	0.0427795		P13637
Putative uncharacterized protein DBN1;Drebrin;Developmentally-regulated brain protein;cDNA FLJ36806 fis, clone ASTRO1000165, highly similar to Drebrin;Drebrin 1, isoform CRA_d	DBN1;D0S117E;hCG_2039393	A8MV58;Q16643-1;Q16643;Q16643-2;B3KSQ7	1	0	0.54543	0	0.0432464		A8MV58
Ras-related protein Rap-1b;GTP-binding protein smg p21B;cDNA FLJ50714, moderately similar to Ras-related protein Rap-1b;Ras-related protein Rap-1b-like protein;cDNA FLJ51696, highly similar to Ras-related protein Rap-1b;PNAS-140;cDNA FLJ50711, moderately similar to Ras-related protein Rap-1b	RAP1B;OK/SW-cl.11	P61224;B4DW94;A6NIZ1;B4DQI8;Q9BXV4;B4DW74	1	0.552647	0.121102	0.149009	0.0433624		P61224
Alanine aminotransferase 1;Glutamic--pyruvic transaminase 1;Glutamate pyruvate transaminase 1;Glutamic--alanine transaminase 1;cDNA FLJ50023, highly similar to Alanine aminotransferase 1 (EC 2.6.1.2)	GPT;AAT1;GPT1	P24298;B0YJ18;B4DPT5	1	221.183	1.73205	119.488	0.0433929		P24298
Golgi reassembly-stacking protein 2;Golgi reassembly-stacking protein of 55 kDa;p59;Golgi phosphoprotein 6;cDNA FLJ59712, highly similar to Golgi reassembly-stacking protein 2;cDNA FLJ55232, highly similar to Golgi reassembly-stacking protein 2;Golgi reassembly stacking protein 2, 55kDa, isoform CRA_c;Putative uncharacterized protein GORASP2;cDNA FLJ54595, highly similar to Golgi reassembly-stack…	GORASP2;hCG_15834	Q9H8Y8-1;Q9H8Y8;B4DKT0;B4DNR1;Q53TE3;B4DEI4;Q9H8Y8-2;B4DQF1	1	0.289802	0.528966	0.207606	0.0435023		Q9H8Y8
Eukaryotic translation initiation factor 2 subunit 3;Eukaryotic translation initiation factor 2 subunit gamma;cDNA FLJ78120, highly similar to Homo sapiens eukaryotic translation initiation factor 2, subunit 3 gamma, 52kDa (EIF2S3), mRNA;cDNA, FLJ92541, highly similar to Homo sapiens eukaryotic translation initiation factor 2, subunit 3 gamma, 52kDa (EIF2S3), mRNA;Eukaryotic translation initiatio…	EIF2S3;EIF2G;hCG_1743102	P41091;A8K2Y2;B2R5N2;B5BTZ4;Q53HK3;Q2VIR3-1;Q2VIR3;Q2VIR3-2	1	0.374119	0.341048	0.149815	0.0435787		P41091
Clathrin interactor 1;Epsin-4;Epsin-related protein;Enthoprotin;Clathrin-interacting protein localized in the trans-Golgi region	CLINT1;ENTH;EPN4;EPNR;KIAA0171	Q14677-1;Q14677	1	0.0564595	0.43261	0.0977906	0.0437722		Q14677
Alpha-2-macroglobulin;C3 and PZP-like alpha-2-macroglobulin domain-containing protein 5	A2M;CPAMD5;FWP007	P01023;Q9BQ22	1	2.38842	0.228703	0.952628	0.0437739		P01023
Growth factor receptor-bound protein 2;Adapter protein GRB2;SH2/SH3 adapter GRB2;Protein Ash;Growth factor receptor-bound protein 2, isoform CRA_a;cDNA, FLJ96637, Homo sapiens growth factor receptor-bound protein 2 (GRB2), mRNA;cDNA FLJ33691 fis, clone BRAWH2002976, highly similar to GROWTH FACTOR RECEPTOR-BOUND PROTEIN 2;GRB2 protein	GRB2;ASH;hCG_27179	P62993-1;P62993;B0LPF3;B3KR50;Q6ICN0;P62993-2	1	0.2826	0.273626	0.122351	0.0438308		P62993
NADH dehydrogenase [ubiquinone] 1 beta subcomplex subunit 3;NADH-ubiquinone oxidoreductase B12 subunit;Complex I-B12;NADH dehydrogenase (Ubiquinone) 1 beta subcomplex, 3, 12kDa, isoform CRA_a;NDUFB3 protein;Putative uncharacterized protein NDUFB3	NDUFB3;hCG_1776639	O43676;Q6IB80	1	3.38952	0.0664047	1.27116	0.0438515		O43676
Eukaryotic translation initiation factor 2A;65 kDa eukaryotic translation initiation factor 2A;cDNA FLJ58035, highly similar to Homo sapiens eukaryotic translation initiation factor (eIF) 2A (eIF2A), mRNA;cDNA FLJ57962, highly similar to Homo sapiens eukaryotic translation initiation factor (eIF) 2A (eIF2A), mRNA	EIF2A;CDA02;MSTP004;MSTP089	Q9BY44-1;Q9BY44;B4DQ14;Q9BY44-2;B4DF96	1	0.153063	0.374971	0.265114	0.0438752		Q9BY44
Cytoplasmic dynein 1 intermediate chain 2;Cytoplasmic dynein intermediate chain 2;Dynein intermediate chain 2, cytosolic;DH IC-2;Dynein, cytoplasmic, intermediate polypeptide 2 variant;cDNA FLJ53290, highly similar to Cytoplasmic dynein 1 intermediate chain 2;cDNA FLJ55471, highly similar to Cytoplasmic dynein 1 intermediate chain 2;CDNA: FLJ22921 fis, clone KAT06711	DYNC1I2;DNCI2;DNCIC2	Q13409-1;Q13409;Q13409-5;Q13409-2;Q59GU5;B4DPZ3;Q13409-3;B4DX93;Q9H5W7;Q13409-6	1	0.109092	0.428345	0.108532	0.0439509		Q13409
Nucleolar protein 58;Nucleolar protein 5;cDNA FLJ13913 fis, clone Y79AA1000231, highly similar to Nucleolar protein NOP5;cDNA FLJ56668, highly similar to Nucleolar protein NOP5	NOP58;NOL5;NOP5;HSPC120	Q9Y2X3;B3KN82;B4DUY3	1	0	0.550717	0	0.043981		Q9Y2X3
39S ribosomal protein L12, mitochondrial;5c5-2;Mitochondrial ribosomal protein L7/L12	MRPL12;RPML12;MRPL7/L12	P52815;Q96Q74	1	0.578015	0.320679	0.0976321	0.0440615		P52815
cDNA FLJ77432, highly similar to Homo sapiens poly(rC) binding protein 2 (PCBP2), transcript variant 2, mRNA;Poly(RC) binding protein 2, isoform CRA_b;Poly(RC)-binding protein 2 isoform b variant;Poly(RC) binding protein 2;Poly(RC) binding protein 2, isoform CRA_d;Poly(rC)-binding protein 2;Alpha-CP2;Poly(RC) binding protein 2, isoform CRA_a;PCBP2 protein;cDNA FLJ58476, highly similar to Poly(rC)…	PCBP2;hCG_2017557	A8K7X6;Q59HD4;Q6IPF4;Q15366;Q68Y55;Q32Q82;B4DLC0;B4DXP5	1	0.41123	0.280814	0.12073	0.044139		A8K7X6
Acetyl-CoA acetyltransferase, mitochondrial;Acetoacetyl-CoA thiolase;T2;Acetyl-Coenzyme A acetyltransferase 1 (Acetoacetyl Coenzyme A thiolase), isoform CRA_b;cDNA, FLJ92949, Homo sapiens acetyl-Coenzyme A acetyltransferase 1 (acetoacetyl Coenzyme A thiolase) (ACAT1), nuclear gene encoding mitochondrial protein, mRNA	ACAT1;ACAT;MAT;hCG_39503	P24752;B2R6H1	1	1.88729	0.0740436	0.444733	0.044273		P24752
Lysyl-tRNA synthetase, isoform CRA_d;Putative uncharacterized protein KARS;Lysyl-tRNA synthetase;Lysine--tRNA ligase;cDNA FLJ44621 fis, clone BRACE2016896, highly similar to Lysyl-tRNA synthetase (EC 6.1.1.6)	KARS;KIAA0070	A8MSK1;Q9HB23;Q15046;Q6ZTI3	1	0.196934	0.23937	0.3411	0.0443034		A8MSK1
Zinc finger CCHC domain-containing protein 3;ZCCHC3 protein	ZCCHC3;C20orf99	Q9NUD5;Q3B7J3	1	0	0.553048	0	0.0443059		Q9NUD5
Obscurin;Obscurin-myosin light chain kinase;Obscurin-RhoGEF;Putative uncharacterized protein DKFZp666E245;Putative uncharacterized protein OBSCN	OBSCN;KIAA1556;KIAA1639;DKFZp666E245	Q5VST9-3;Q5VST9;Q658N7;Q5VST9-5;A8MRB5;Q5VST9-4	1	0.0999968	0.563074	0.1732	0.0443172		Q5VST9
Putative uncharacterized protein RPL23A;Ribosomal protein L23a, isoform CRA_a;60S ribosomal protein L23a;Ribosomal protein L23a, isoform CRA_b;cDNA, FLJ92405, Homo sapiens ribosomal protein L23a (RPL23A), mRNA	RPL23A;hCG_1988529	A8MUS3;A8MXA8;P62750;B2R5B2	1	0.25896	0.359532	0.108636	0.0443656		A8MUS3
Actin-related protein 3;Actin-like protein 3;cDNA FLJ51082, highly similar to Actin-like protein 3;cDNA FLJ52521, highly similar to Actin-like protein 3;cDNA FLJ51148, highly similar to Actin-like protein 3;cDNA FLJ52434, highly similar to Actin-like protein 3;cDNA, FLJ79112, highly similar to Actin-like protein 3;cDNA, FLJ79295, highly similar to Actin-like protein 3;ARP3 actin-related protein 3…	ACTR3;ARP3;hCG_26669	P61158;B4DT29;B4DTI0;B4DXW1;Q53QM2;Q59FV6	1	0.344944	0.359651	0.049069	0.0444274		P61158
Myosin binding protein C, cardiac;MYBPC3 protein;cDNA FLJ76866, highly similar to Homo sapiens myosin binding protein C, cardiac (MYBPC3), mRNA;Putative uncharacterized protein MYBPC3;cDNA FLJ58082, highly similar to Myosin-binding protein C, cardiac-type;Mutant cardiac myosin-binding protein C;Myosin-binding protein C, cardiac-type;Cardiac MyBP-C;C-protein, cardiac muscle isoform	MYBPC3	A5PL00;A5YM48;A8K6A4;A8MXZ9;B4DNB5;B6D425;B6D426;Q14896	1	1.8666	0.296981	0.393646	0.0444692		A5PL00
60S ribosomal protein L24;Ribosomal protein L30;Ribosomal protein L24, isoform CRA_a;cDNA, FLJ92265, Homo sapiens ribosomal protein L24 (RPL24), mRNA	RPL24;hCG_2023003	P83731;B2R4Y3;Q5T8W0	1	0.209755	0.25482	0.183725	0.0444756		P83731
Transcription elongation regulator 1;TATA box-binding protein-associated factor 2S;Transcription factor CA150;Transcription elongation regulator 1-like protein	TCERG1;CA150;TAF2S;TCERG1L	O14776-1;O14776;O14776-2;Q5VWI1	1	0	0.554639	0	0.0445281		O14776
Creatine kinase B-type;Creatine kinase B chain;B-CK;cDNA FLJ52237, highly similar to Creatine kinase B-type (EC 2.7.3.2)	CKB;CKBB	P12277;A8K236;B2R5R4;Q6FG40;B4DP56	1	2.25884	0.215479	0.913726	0.0445404		P12277
[Protein ADP-ribosylarginine] hydrolase-like protein 1;ADP-ribosylhydrolase 2	ADPRHL1;ARH2	Q8NDY3-1;Q8NDY3;Q8NDY3-2	1	0.953859	0.151845	0.128262	0.0446479		Q8NDY3
Myoferlin;Fer-1-like protein 3	MYOF;FER1L3;KIAA1207	Q9NZM1-1;Q9NZM1;Q9NZM1-6;Q9NZM1-2;Q9NZM1-3;Q9NZM1-5	1	0.550777	0.848761	0.780269	0.0446913		Q9NZM1
Myosin-9;Myosin heavy chain 9;Myosin heavy chain, non-muscle IIa;Non-muscle myosin heavy chain IIa;Cellular myosin heavy chain, type A;Non-muscle myosin heavy chain A;cDNA FLJ77145, highly similar to Homo sapiens myosin, heavy polypeptide 9, non-muscle (MYH9), mRNA;cDNA FLJ57040, highly similar to Myosin-9;Non-muscle myosin heavy polypeptide 9;MYH9 variant protein;Myosin, heavy polypeptide 9, non…	MYH9;hCG_41454	P35579-1;P35579;A8K6E4;B4E3S1;Q60FE2;Q86XU5;Q99529;P35579-2;Q2PS10;Q9UMJ0	1	0.298331	0.344666	0.0469098	0.0449142		P35579
Guanine nucleotide-binding protein G(I)/G(S)/G(T) subunit beta-1;Transducin beta chain 1;cDNA, FLJ92996, highly similar to Homo sapiens guanine nucleotide binding protein (G protein), beta polypeptide 1 (GNB1), mRNA;GNB1 protein;cDNA FLJ16663 fis, clone THYMU2005759, highly similar to Guanine nucleotide-binding proteinG(I)/G(S)/G(T) subunit beta 1;Guanine nucleotide binding protein (G protein), b…	GNB1;RP1-283E3.7-004;RP1-283E3.7-007;RP1-283E3.7-006	P62873;B2R6K4;Q1RMY8;B3KVK2;Q5QPT1;Q71UM6;Q71UM7;B1AKQ9;B1AKQ8	1	0.530278	0.155157	0.12149	0.0449681		P62873
Serum deprivation-response protein;Phosphatidylserine-binding protein;PS-p68;cDNA FLJ78516	SDPR	O95810;A8K2W3	1	1.64318	0.295104	0.390832	0.0449881		O95810
Putative uncharacterized protein LCN2;Neutrophil gelatinase-associated lipocalin;Lipocalin 2;p25;25 kDa alpha-2-microglobulin-related subunit of MMP-9;Lipocalin-2;Oncogene 24p3;cDNA FLJ55416, highly similar to Neutrophil gelatinase-associated lipocalin;Lipocalin 2 (Oncogene 24p3), isoform CRA_c;LCN2 protein	LCN2;NGAL;RP11-395P17.6-002;HNL;RP11-395P17.6-001;hCG_18559	A6NII8;B2ZDQ1;Q5SYV9;P80188;B4DWV4;Q5SYW0;Q6FGL5	1	2.05565	0.617828	0.695565	0.0450575		A6NII8
Aspartyl-tRNA synthetase, cytoplasmic;Aspartate--tRNA ligase;Cell proliferation-inducing gene 40 protein;cDNA FLJ77907, highly similar to Homo sapiens aspartyl-tRNA synthetase, mRNA;Aspartyl-tRNA synthetase, isoform CRA_a;Putative uncharacterized protein DARS;Putative uncharacterized protein DKFZp781B11202	DARS;PIG40;hCG_25752;DKFZp781B11202	P14868;A8K3J2;Q53T60;Q68CR9	1	0.361867	0.328005	0.0683338	0.0452267		P14868
Ras GTPase-activating protein-binding protein 1;G3BP-1;ATP-dependent DNA helicase VIII;HDH-VIII;GAP SH3 domain-binding protein 1;GTPase activating protein (SH3 domain) binding protein 1;Ras-GTPase-activating protein SH3-domain-binding protein variant;Putative uncharacterized protein DKFZp313K0921;cDNA FLJ50206, highly similar to Ras-GTPase-activating protein-binding protein 1 (EC 3.6.1.-);Putativ…	G3BP1;G3BP;DKFZp313K0921;DKFZp686L1159;hCG_39146	Q13283;Q32P45;Q53HH4;Q5HYE9;Q5U0Q1;Q6FI03	1	0	0.560353	0	0.0453287		Q13283
Monocarboxylate transporter 1;Solute carrier family 16 member 1;cDNA, FLJ92862, highly similar to Homo sapiens solute carrier family 16 (monocarboxylic acid transporters), member 1 (SLC16A1), mRNA;Solute carrier family 16, member 1 (Monocarboxylic acid transporter 1);Monocarboxylate transporter isoform 1;Solute carrier family 16 (Monocarboxylic acid transporters), member 1, isoform CRA_b;cDNA FLJ…	SLC16A1;MCT1;RP4-580L15.1-001;hCG_37455;RP4-580L15.1-002;RP4-580L15.1-005	P53985;B2R6A5;Q5T8R6;B4DKS0;B4E106;Q49A45;Q5T8R5;Q5T8R3	1	0.325073	0.0832723	0.303507	0.0453887		P53985
ATP synthase-coupling factor 6, mitochondrial;ATP synthase, H+ transporting, mitochondrial F0 complex, subunit F6, isoform CRA_b;ATP5J protein;Proliferation-inducing protein 36;cDNA, FLJ92165, Homo sapiens ATP synthase, H+ transporting, mitochondrial F0complex, subunit F6 (ATP5J), nuclear gene encoding mitochondrialprotein, mRNA;ATP synthase, H+ transporting, mitochondrial F0 complex, subunit F6;…	ATP5J;ATP5A;ATPM;hCG_2007844	P18859;Q6IB54;Q6NZ59;A8MUH2	1	2.15358	0.124823	0.522479	0.0453976		P18859
14-3-3 protein theta;14-3-3 protein tau;14-3-3 protein T-cell;Protein HS1;cDNA FLJ52118, highly similar to 14-3-3 protein theta;cDNA FLJ51144, highly similar to 14-3-3 protein theta;cDNA, FLJ79057, highly similar to 14-3-3 protein theta;Putative uncharacterized protein YWHAQ	YWHAQ	P27348;B4DMT8;B4DY04;Q53S41;Q53RR5	1	0.251162	0.452022	0.0906187	0.0454337		P27348
NADH dehydrogenase [ubiquinone] iron-sulfur protein 2, mitochondrial;NADH-ubiquinone oxidoreductase 49 kDa subunit;Complex I-49kD;NADH dehydrogenase (Ubiquinone) Fe-S protein 2, 49kDa (NADH-coenzyme Q reductase) variant;NADH-ubiquinone oxidoreductase NDUFS2 subunit	NDUFS2	O75306;Q53HG2;Q9HC11;Q9HC12	1	2.0929	0.438772	0.41413	0.045435		O75306
Hydroxymethylglutaryl-CoA lyase, mitochondrial;3-hydroxy-3-methylglutarate-CoA lyase;3-hydroxymethyl-3-methylglutaryl-Coenzyme A lyase;cDNA FLJ16378 fis, clone TKIDN2016399, highly similar to Hydroxymethylglutaryl-CoA lyase, mitochondrial (EC 4.1.3.4);3-hydroxymethyl-3-methylglutaryl-Coenzyme A lyase (Hydroxymethylglutaricaciduria), isoform CRA_b;3-hydroxymethyl-3-methylglutaryl-Coenzyme A lyase …	HMGCL;RP5-886K2.8-001;hCG_37683	P35914;B1AK13;Q6IBC0;B4DUP4;A6NMQ0	1	2.7909	0.14447	0.968712	0.0454892		P35914
Voltage-dependent anion-selective channel protein 3;Outer mitochondrial membrane protein porin 3	VDAC3	Q9Y277-1;Q9Y277	1	1.68035	0.158406	0.293892	0.0454979		Q9Y277
Synaptic glycoprotein SC2;Trans-2,3-enoyl-CoA reductase;cDNA FLJ10554 fis, clone NT2RP2002385, highly similar to Synaptic glycoprotein SC2;cDNA FLJ36768 fis, clone ADIPS1000064, highly similar to Synaptic glycoprotein SC2	GPSN2;SC2	Q9NZ01-1;Q9NZ01;B3KM97;B3KSQ1	1	0	0.561913	0	0.045548		Q9NZ01
UPF0317 protein C14orf159, mitochondrial;cDNA FLJ41538 fis, clone BRTHA2018129;C14orf159 variant protein;C14orf159 protein;Chromosome 14 open reading frame 159 variant;cDNA FLJ34075 fis, clone FCBBF3003216	C14orf159;UNQ2439/PRO5000;C14orf159 variant protein	Q7Z3D6-2;Q7Z3D6;B3KUI7;B3KVU6;Q4LE40;Q6IA66;Q7Z3D6-1;Q53HP9;Q8NB88;Q7Z3D6-3;Q7Z3D6-4;Q7Z3D6-5	1	1.81577	0.346609	0.637857	0.0455837		Q7Z3D6
cDNA FLJ76284, highly similar to Homo sapiens succinate-CoA ligase, GDP-forming, alpha subunit (SUCLG1), mRNA;cDNA, FLJ93802, highly similar to Homo sapiens succinate-CoA ligase, GDP-forming, alpha subunit (SUCLG1), mRNA;Succinyl-CoA ligase [GDP-forming] subunit alpha, mitochondrial;Succinyl-CoA synthetase subunit alpha;SUCLG1 protein;Putative uncharacterized protein tmp_locus_1	SUCLG1;tmp_locus_1	A8K4W7;B2R8A1;P53597;Q6IAL5	1	2.36568	0.0741708	0.697303	0.0456176		A8K4W7
Heat shock cognate 71 kDa protein;Heat shock 70 kDa protein 8;cDNA FLJ77848;cDNA FLJ38781 fis, clone LIVER2000216, highly similar to HEAT SHOCK COGNATE 71 kDa PROTEIN;cDNA FLJ55485, highly similar to Heat shock cognate 71 kDa protein;Heat shock 70kDa protein 8 isoform 1 variant;Putative uncharacterized protein;HSPA8 protein;cDNA FLJ20564 fis, clone KAT12033;Uncharacterized bone marrow protein BM0…	HSPA8;HSC70;HSP73;HSPA10	P11142-1;P11142;A8K7Q2;B3KTV0;B4E1Q1;Q53GZ6;Q96BE0;Q96H53;Q96IS6;Q9NWW3;Q9NZ87;P11142-2;Q53HF2	1	0.634841	0.183257	0.0324068	0.0456508		P11142
N-acetyl-D-glucosamine kinase;GlcNAc kinase;cDNA FLJ56394, highly similar to N-acetylglucosamine kinase (EC 2.7.1.59);N-acetylglucosamine kinase	NAGK;hCG_41008	Q9UJ70;B4DLZ5	1	0.315708	0.314723	0.136816	0.0456633		Q9UJ70
Xin actin-binding repeat-containing protein 2;Cardiomyopathy-associated protein 3;Beta-xin;Xeplin	XIRP2;CMYA3	A4UGR9-1;A4UGR9;A4UGR9-3;A4UGR9-2	1	3.65531	0.488444	1.40189	0.0457065		A4UGR9
Apolipoprotein O-like;Protein FAM121A;Putative uncharacterized protein DKFZp779P1227	APOOL;CXorf33;FAM121A;UNQ8193/PRO23204;DKFZp779P1227	Q6UXV4;Q68DW4	1	2.3779	0.0994302	0.761442	0.045798		Q6UXV4
Protein quaking;cDNA FLJ52494, highly similar to Mus musculus quaking (Qk), mRNA	QKI;HKQ	Q96PU8-4;Q96PU8;Q96PU8-7;Q96PU8-2;Q96PU8-1;Q96PU8-3;Q96PU8-6;B4DHR6;Q96PU8-8;Q96PU8-5	1	0.114657	0.423687	0.0995663	0.0459199		Q96PU8
Heat shock protein beta-8;Alpha-crystallin C chain;Small stress protein-like protein HSP22;E2-induced gene 1 protein;Protein kinase H11;Heat shock 22kDa protein 8;cDNA, FLJ92864, Homo sapiens protein kinase H11 (H11), mRNA	HSPB8;CRYAC;E2IG1;HSP22;PP1629;hCG_27207	Q9UJY1;B2R6A6	1	2.87103	0.330636	0.732278	0.0460289		Q9UJY1
Proteasome subunit alpha type-5;Proteasome zeta chain;Macropain zeta chain;Multicatalytic endopeptidase complex zeta chain;Proteasome subunit alpha type;cDNA FLJ52182, highly similar to Proteasome subunit alpha type 5 (EC 3.4.25.1);Proteasome (Prosome, macropain) subunit, alpha type, 5, isoform CRA_c	PSMA5;hCG_39916	P28066;B2R8F6;B4E2V4;Q5U0A0	1	0.761911	0.282552	0.372315	0.0461027		P28066
Rho-associated protein kinase 1;Rho-associated, coiled-coil-containing protein kinase 1;p160 ROCK-1;Renal carcinoma antigen NY-REN-35	ROCK1	B0YJ91;Q13464;Q2KHM4;Q59GZ4	1	0	0.566812	0	0.0462384		B0YJ91
60S ribosomal protein L38;Ribosomal protein L38, isoform CRA_a;cDNA, FLJ92401, Homo sapiens ribosomal protein L38 (RPL38), mRNA	RPL38;hCG_1986031	P63173;B2R5A8	1	0.162966	0.429647	0.282265	0.046285		P63173
60S ribosomal protein L6;TAX-responsive enhancer element-binding protein 107;Neoplasm-related protein C140	RPL6;TXREB1	B2R4K7;Q9HBB3;Q02878;B4DRX3;Q8N5Z7;Q8TBK5	1	0.171632	0.458149	0.0188698	0.0463148		B2R4K7
Dihydropteridine reductase;HDHPR;Quinoid dihydropteridine reductase;cDNA FLJ76220, highly similar to Homo sapiens quinoid dihydropteridine reductase (QDPR), mRNA;Quinoid dihydropteridine reductase, isoform CRA_d;cDNA FLJ42391 fis, clone 3NB692002806, highly similar to Dihydropteridine reductase (EC 1.5.1.34);Quinoid dihydropteridine reductase, isoform CRA_e	QDPR;DHPR;hCG_39606	P09417;A8K158;B3KW71	1	2.54198	0.0770614	0.90533	0.0463413		P09417
Myristoylated alanine-rich C-kinase substrate;Protein kinase C substrate, 80 kDa protein, light chain;MARCKS protein	MARCKS;MACS;PRKCSL	P29966;Q05C82;Q6NVI1	1	0.163421	0.491348	0.077785	0.0464195		P29966
Creatine kinase M-type;Creatine kinase M chain;M-CK;cDNA, FLJ93793, highly similar to Homo sapiens creatine kinase, muscle (CKM), mRNA;cDNA FLJ57602, highly similar to Creatine kinase M-type (EC 2.7.3.2);cDNA FLJ57403, moderately similar to Creatine kinase M-type (EC 2.7.3.2)	CKM;CKMM	P06732;B2R892;B4DUP1;B4DNF8	1	2.08063	0.211961	0.415928	0.0465843		P06732
Ig kappa chain V-IV region;Ig kappa chain V-IV region B17;Ig kappa chain V-IV region JI;Ig kappa chain V-IV region Len;Microfibrillar protein 2;Ig kappa chain V-IV region STH	IGKV4-1	P06312;P06314;P06313;P01625;Q9NP29;P83593	1	11.5694	1.73205	5.39176	0.0466778		P06312
Heat shock 70 kDa protein 4;Heat shock 70-related protein APG-2;HSP70RY;cDNA, FLJ79511, highly similar to Heat shock 70 kDa protein 4;cDNA, FLJ79520, highly similar to Heat shock 70 kDa protein 4;cDNA, FLJ79524, highly similar to Heat shock 70 kDa protein 4;cDNA, FLJ79536, highly similar to Heat shock 70 kDa protein 4;cDNA FLJ50510, highly similar to Heat shock 70 kDa protein 4;cDNA FLJ52593, hig…	HSPA4;APG2;HS24/p52;HS24/P52	P34932;B0AZS1;B0AZT0;B0AZU6;B4DH02;B4DIZ3;B4DN48;B4DSE8;B4DT47;B4DUS3;B4E0H6;B4E354;O14992;Q59GF8;Q7KYN0	1	0.331338	0.434352	0.0548829	0.0467724		P34932
Importin-9;Ran-binding protein 9;Importin 9;Importin 9, isoform CRA_b	IPO9;IMP9;KIAA1192;RANBP9;HSPC273;RP11-90L20.4-001;hCG_2025277	Q96P70;B1ASV5	1	0	0.570737	0	0.0467936		Q96P70
Transforming acidic coiled-coil-containing protein 2;Anti Zuai-1;TACC2 protein;Transforming, acidic coiled-coil containing protein 2;HCG41426, isoform CRA_c	TACC2;RP11-296H2.1-013;RP11-296H2.1-018;RP11-296H2.1-020;RP11-296H2.1-015;hCG_41426	O95359-4;O95359;B2RWP4;Q4VXL2;O95359-5;Q4VXL8;O95359-3;O95359-1;O95359-6;Q4VXL5;Q4VXL4;O95359-2	1	0.149412	0.253924	0.258789	0.046844		O95359
Aldehyde dehydrogenase X, mitochondrial;Aldehyde dehydrogenase family 1 member B1;Aldehyde dehydrogenase 5;cDNA FLJ51238, highly similar to Aldehyde dehydrogenase X, mitochondrial (EC 1.2.1.3)	ALDH1B1;ALDH5;ALDHX	P30837;B2R8F0;B4DLJ0	1	0.667997	0.670066	0.504992	0.0469193		P30837
Protein-cysteine N-palmitoyltransferase HHAT-like protein;Hedgehog acyltransferase-like protein;Glycerol uptake/transporter homolog	HHATL;C3orf3;GUP1;KIAA1173	Q9HCP6	1	2.6854	0.996576	0.0993014	0.0469995		Q9HCP6
ATP synthase subunit b, mitochondrial;cDNA FLJ78635, highly similar to Homo sapiens ATP synthase, H+ transporting, mitochondrial F0 complex, subunit b, isoform 1 (ATP5F1), transcript variant 1, mRNA;Cell proliferation-inducing protein 47;HCG39985, isoform CRA_a;cDNA, FLJ94101, Homo sapiens ATP synthase, H+ transporting, mitochondrial F0complex, subunit b, isoform 1 (ATP5F1), mRNA;ATP synthase, H+…	ATP5F1;hCG_39985;RP11-552M11.5-005	P24539;A8K4W2;Q08ET0;Q53GB3;Q5QNZ2	1	1.77234	0.110817	0.476609	0.0470198		P24539
Kinectin;Kinesin receptor;CG-1 antigen;Rhabdomyosarcoma antigen MU-RMS-40.19;KTN1 protein;cDNA FLJ61494, highly similar to Kinectin;cDNA FLJ31308 fis, clone LIVER1000139, highly similar to Kinectin;cDNA FLJ43510 fis, clone PERIC2003720, highly similar to Kinectin;Kinectin 1 (Kinesin receptor)	KTN1;CG1;KIAA0004	Q86UP2-1;Q86UP2;Q5GGW3;B4DZ88;Q86UP2-2;B3KP76;Q3SWV9;Q6NZ46;Q6PDF7;B3KWP6;Q17RZ5	1	0.272505	0.261785	0.158664	0.0470568		Q86UP2
EMILIN-1;Elastin microfibril interface-located protein 1;Elastin microfibril interfacer 1;Elastin microfibril interfacer 1, isoform CRA_b	EMILIN1;EMI;hCG_23707	Q9Y6C2;A5PL03	1	0.119774	0.655271	0.152086	0.0470837		Q9Y6C2
Sorcin;22 kDa protein;CP-22;V19;cDNA FLJ54267, moderately similar to Sorcin;Calcium binding protein amplified in mutlidrug-resistant cells;Putative uncharacterized protein SRI;cDNA FLJ60640, highly similar to Sorcin	SRI	P30626;B4DHQ6;Q75MZ6;A8MTH6;B4DKK2	1	0.502521	0.216319	0.286999	0.0471617		P30626
Adenylate kinase isoenzyme 4, mitochondrial;Adenylate kinase 3-like;ATP-AMP transphosphorylase;AK3L1 protein;Adenylate kinase 3-like 1;cDNA, FLJ94180, Homo sapiens adenylate kinase 3 (AK3), mRNA	AK3L1;AK3;AK4;AK3L2	P27144;B2R927	1	1.67909	0.306419	0.234251	0.0472394		P27144
Kinesin-1 heavy chain;Ubiquitous kinesin heavy chain;Conventional kinesin heavy chain;cDNA FLJ76989, highly similar to Homo sapiens kinesin family member 5B (KIF5B), mRNA;KIF5B protein	KIF5B;KNS;KNS1	P33176;A8K048;Q2TA90;Q66K46;Q6P164	1	0.491015	0.300466	0.171405	0.0472617		P33176
Nicotinamide phosphoribosyltransferase;Pre-B-cell colony-enhancing factor 1;Visfatin;Pre-B-cell colony enhancing factor 1;Pre-B-cell colony enhancing factor 1, isoform CRA_a;cDNA FLJ76475, highly similar to Homo sapiens pre-B-cell colony enhancing factor 1 (PBEF1), transcript variant 1, mRNA;Putative uncharacterized protein DKFZp666B131;Novel protein similar to Pre-B cell enhancing factor (PBEF)	NAMPT;PBEF;PBEF1;hCG_18025;tcag7.961;DKFZp666B131;RP11-92J19.4;RP11-92J19.4-001	P43490-1;P43490;A4D0Q9;Q658Z1;Q5SYT8;P43490-2;A4D0R0	1	0.404492	0.365236	0.0810715	0.0472873		P43490
Calnexin;Major histocompatibility complex class I antigen-binding protein p88;p90;IP90;Calnexin, isoform CRA_a;cDNA, FLJ92651, Homo sapiens calnexin (CANX), mRNA;cDNA FLJ55574, highly similar to Calnexin;cDNA FLJ54242, highly similar to Calnexin	CANX;hCG_1985937	P27824;B2R5V8;B4DGP8;B4E2T8	1	0.588855	0.0631086	0.183672	0.0474155		P27824
Hepatoma-derived growth factor;High-mobility group protein 1-like 2;cDNA, FLJ96580, highly similar to Homo sapiens hepatoma-derived growth factor (high-mobility group protein 1-like) (HDGF), mRNA;Hepatoma-derived growth factor (High-mobility group protein 1-like);cDNA FLJ75113;cDNA FLJ39092 fis, clone NT2RP7019835, highly similar to HEPATOMA-DERIVED GROWTH FACTOR;Hepatoma-derived growth factor (H…	HDGF;HMG1L2;RP11-66D17.10-003;RP11-66D17.10-002;hCG_1775235	P51858;B2RDE8;Q5SZ07;A8K8G0;B3KU21;Q5SZ08	1	0.4461	0.384885	0.0711325	0.0476234		P51858
Isocitrate dehydrogenase [NADP], mitochondrial;Oxalosuccinate decarboxylase;NADP(+)-specific ICDH;IDP;ICD-M;Isocitrate dehydrogenase 2 (NADP+), mitochondrial, isoform CRA_a;cDNA, FLJ93011, Homo sapiens isocitrate dehydrogenase 2 (NADP+), mitochondrial(IDH2), mRNA;cDNA FLJ50469, highly similar to Isocitrate dehydrogenase;cDNA, FLJ79287, highly similar to Isocitrate dehydrogenase;cDNA FLJ50654, hig…	IDH2;hCG_201466	P48735;B2R6L6;B4DFL2;B4DSZ6;Q13584;Q53GL5	1	2.09884	0.16668	0.588861	0.047676		P48735
26S proteasome non-ATPase regulatory subunit 12;26S proteasome regulatory subunit p55;Proteasome (Prosome, macropain) 26S subunit, non-ATPase, 12, isoform CRA_c;cDNA FLJ33879 fis, clone CTONG2007091, highly similar to 26S proteasome non-ATPase regulatory subunit 12;Putative uncharacterized protein PSMD12	PSMD12	O00232;A6NP15	1	0.318176	0.193616	0.551098	0.0477665		O00232
Histone H1.0;Histone H1(0);H1 histone family, member 0;cDNA, FLJ92958, Homo sapiens H1 histone family, member 0 (H1F0), mRNA;cDNA FLJ54804, highly similar to Histone H1.0	H1F0;H1FV;hCG_1641126	P07305;B2R6I0;B4DRD6	1	0.287567	0.28016	0.249041	0.0482463		P07305
60S ribosomal protein L31;cDNA, FLJ92036, highly similar to Homo sapiens ribosomal protein L31 (RPL31), mRNA;Ribosomal protein L31;RPL31 protein	RPL31	P62899;B2R4C1;Q76N53;Q6IRZ0	1	0.150024	0.440591	0.100476	0.0482712		P62899
Chitinase domain-containing protein 1;Stabilin-1-interacting chitinase-like protein;cDNA FLJ55809	CHID1;GL008;PSEC0104;SB139	Q9BWS9-1;Q9BWS9;B3KWB0;B4DN31;Q9BWS9-2;Q9BWS9-3	1	0.113027	0.327892	0.195768	0.0483455		Q9BWS9
Aminomethyltransferase, mitochondrial;Glycine cleavage system T protein;Aminomethyltransferase;cDNA FLJ59878, highly similar to Aminomethyltransferase, mitochondrial (EC 2.1.2.10);cDNA FLJ59850, moderately similar to Aminomethyltransferase, mitochondrial (EC 2.1.2.10);AMT protein	AMT;GCST;hCG_2001997	P48728;A8K3I5;B3KTU4;B4DE61;B4DGG9;Q96IG6;B4DEE9;B4DJQ0;B3KRJ7;Q49A62	1	1.76146	0.127125	0.477659	0.0484325		P48728
TIM21-like protein, mitochondrial;cDNA FLJ78000;Chromosome 18 open reading frame 55, isoform CRA_b;cDNA, FLJ94576	C18orf55;HSPC154;hCG_16049	Q9BVV7;A8K1K8	1	2.3098	0.326984	1.09058	0.0485382		Q9BVV7
Endoplasmic reticulum protein ERp29;ERp31;ERp28	ERP29;C12orf8;ERP28	P30040	1	0.543102	0.216511	0.0992594	0.0485629		P30040
Serine-threonine kinase receptor-associated protein;UNR-interacting protein;WD-40 repeat protein PT-WD;MAP activator with WD repeats;cDNA, FLJ79540, highly similar to Serine-threonine kinase receptor-associatedprotein;Serine/threonine kinase receptor associated protein;cDNA, FLJ92599, highly similar to Homo sapiens serine/threonine kinase receptor associated protein (STRAP), mRNA;cDNA FLJ51909, h…	STRAP;MAWD;UNRIP;hCG_25165	Q9Y3F4;B0AZV0;B2R5S5;B4DNJ6	1	0.548708	0.154402	0.217957	0.0487604		Q9Y3F4
Mothers against decapentaplegic homolog 2;Mad-related protein 2;SMAD 2;hSMAD2;JV18-1;MAD, mothers against decapentaplegic homolog 2 (Drosophila);SMAD, mothers against DPP homolog 2 (Drosophila), isoform CRA_b;cDNA, FLJ93422, Homo sapiens MAD, mothers against decapentaplegic homolog 2(Drosophila) (MADH2), mRNA	SMAD2;MADH2;MADR2;hCG_22544	Q15796-1;Q15796;Q53XR6;Q15796-2	1	0.311295	0.177016	0.227374	0.0488668		Q15796
Troponin T, cardiac muscle;Cardiac muscle troponin T;Troponin T type 2 (Cardiac);Cardiac troponin T;Troponin T cardiac isoform;Troponin T type 2 (Cardiac), isoform CRA_b;Troponin T type 2 cardiac;Troponin T	TNNT2;HNTN1;hCG_1641227	P45379-1;P45379;P45379-2;P45379-5;P45379-10;A2TDB9;P45379-8;P45379-6;A8K3K6;Q9BUF6;P45379-7;Q15607;Q7Z554;P45379-3;P45379-4;A9QLG1;A9QLG2;Q15608;P45379-9;A5Z1Y6;Q8IZA1	1	1.56872	0.24764	0.330545	0.048934		P45379
Chaperone activity of bc1 complex-like, mitochondrial;aarF domain-containing protein kinase 3;CABC1 protein;Chaperone, ABC1 activity of bc1 complex homolog (S. pombe);cDNA FLJ55470, highly similar to Chaperone-activity of bc1 complex-like, mitochondrial;cDNA FLJ59354, highly similar to Chaperone-activity of bc1 complex-like, mitochondrial;cDNA FLJ33175 fis, clone ADRGL2002392, highly similar to C…	CABC1;ADCK3;PP265;RP5-1087E8.1-002;RP5-1087E8.1-003	Q8NI60-1;Q8NI60;A1L377;Q5T7A4;Q8NI60-3;B4DVB7;Q8NI60-4;B4DN23;Q5T7A2;B4DED1;B4DU83	1	5.24611	0.471897	2.22092	0.048938		Q8NI60
Cytochrome b-c1 complex subunit 1, mitochondrial;Ubiquinol-cytochrome-c reductase complex core protein 1;Complex III subunit 1;Ubiquinol-cytochrome c reductase core protein I;cDNA, FLJ93573, highly similar to Homo sapiens ubiquinol-cytochrome c reductase core protein I(UQCRC1), mRNA;cDNA FLJ51625, highly similar to Ubiquinol-cytochrome-c reductase complex coreprotein I, mitochondrial (EC 1.10.2.2)	UQCRC1;hCG_41170	P31930;B2R7R8;B4DUL5	1	1.76344	0.436916	0.441485	0.0489619		P31930
IGH@ protein	IGH@	Q6P089	1	2.21846	0.723966	1.39051	0.0490469		Q6P089
Proto-oncogene C-crk;p38;Adapter molecule crk;V-crk sarcoma virus CT10 oncogene homolog (Avian);V-crk sarcoma virus CT10 oncogene homolog (Avian), isoform CRA_a;Putative uncharacterized protein CRK;V-crk sarcoma virus CT10 oncogene homolog (Avian), isoform CRA_d;cDNA FLJ77114, highly similar to Homo sapiens v-crk sarcoma virus CT10 oncogene homolog (avian) (CRK), transcript variant I, mRNA	CRK;hCG_28712	P46108-1;P46108;B0LPE8;P46108-2;Q96GA9	1	0.429429	0.508196	0.743792	0.0491659		P46108
Arylacetamide deacetylase-like 1;Neutral cholesterol ester hydrolase	AADACL1;KIAA1363	Q6PIU2	1	5.25241	0.35185	2.82376	0.0492803		Q6PIU2
Lipid storage droplet protein 5	LSDP5	Q00G26-1;Q00G26;Q00G26-2	1	5.09396	0.990286	1.69318	0.0492937		Q00G26
Supervillin;Archvillin;p205/p250;cDNA FLJ60365, highly similar to Supervillin;cDNA FLJ53284, highly similar to Supervillin;cDNA FLJ53285, highly similar to Supervillin;SVIL protein;Putative uncharacterized protein DKFZp686A17191;Putative uncharacterized protein DKFZp586H1823	SVIL;DKFZp686A17191;DKFZp586H1823	O95425-1;O95425;O95425-2;B4DXQ4;B4E3H1;B4E3N7;Q569J5;Q63HL8;Q659E9	1	0.42689	0.227128	0.117308	0.0493318		O95425
Zinc finger protein 512;cDNA FLJ52441, highly similar to Zinc finger protein 512;cDNA FLJ53912, highly similar to Zinc finger protein 512;Putative uncharacterized protein DKFZp666L156;ZNF512 protein;cDNA FLJ53832, highly similar to Zinc finger protein 512;cDNA, FLJ79198, highly similar to Zinc finger protein 512;Zinc finger protein 512, isoform CRA_c;cDNA FLJ51176, highly similar to Zinc finger p…	ZNF512;KIAA1805;DKFZp666L156;hCG_1784442	Q96ME7;Q53RZ7;B4DES6;B4DSM5;Q658M0;Q86XK6;B4E0X7	1	0	0.58934	0	0.0494485		Q96ME7
UV excision repair protein RAD23 homolog B;XP-C repair-complementing complex 58 kDa protein;RAD23 homolog B (S. cerevisiae), isoform CRA_b;cDNA FLJ43236 fis, clone HCHON2004531, highly similar to UV excision repair protein RAD23 homolog B;UV excision repair protein RAD23 homolog B variant;RAD23-like protein B;cDNA FLJ56531, highly similar to UV excision repair protein RAD23 homolog B;RAD23 homolo…	RAD23B;hCG_14678;RP11-131A5.1-002	P54727;B3KWK8;Q53F10;Q7Z5K8;B4DEA3;Q5W0S5	1	0.324308	0.289739	0.163154	0.0497037		P54727
Signal transducing adapter molecule 1;Signal transducing adapter molecule 1 variant 1;Signal transducing adapter molecule 1 variant 2;Signal transducing adaptor molecule (SH3 domain and ITAM motif) 1, isoform CRA_a;cDNA, FLJ95184, highly similar to Homo sapiens signal transducing adaptor molecule (SH3 domain and ITAM motif) 1 (STAM), mRNA;cDNA FLJ57683, highly similar to Signal transducing adapte…	STAM;STAM1;hCG_21417;STAM2;HBP;hCG_1783316	Q92783-1;Q92783;B0YJ99;B2RAY1;B4DZT2;Q92783-2;O75886-1;O75886;A8K8A0;A6NMU3	1	0	0.59206	0	0.0498399		Q92783
Inactive phospholipase C-like protein 1;Phospholipase C-deleted in lung carcinoma;Phospholipase C-related but catalytically inactive protein;cDNA FLJ59788, highly similar to Homo sapiens phospholipase C-like 1 (PLCL1), mRNA	PLCL1	Q15111-1;Q15111;B4DYZ4;Q15111-2	1	1.51871	0.645394	0.719959	0.0498727		Q15111
60S ribosomal protein L11;CLL-associated antigen KW-12;Cell growth-inhibiting protein 34;Ribosomal protein L11;Ribosomal protein L11, isoform CRA_b;cDNA, FLJ92077, Homo sapiens ribosomal protein L11 (RPL11), mRNA	RPL11;RP11-223J15.3-001;hCG_1739238;RP11-223J15.3-005	P62913-1;P62913;Q08ES8;Q5VVD0;P62913-2;Q5VVC8	1	0.358131	0.350924	0.201333	0.0498833		P62913
Sec1 family domain-containing protein 1;Syntaxin-binding protein 1-like 2;Sly1p;Putative uncharacterized protein SCFD1;Vesicle transport-related protein isoform a variant	SCFD1;C14orf163;KIAA0917;STXBP1L2;FKSG23	A8K2Z5;A8MVJ7;Q53GW1;Q8WVM8;A8MU36	1	0.485822	0.608329	0.304092	0.0500909		A8K2Z5
Proteasome subunit alpha type-4;Proteasome component C9;Macropain subunit C9;Multicatalytic endopeptidase complex subunit C9;Proteasome subunit L;Proteasome subunit alpha type;Proteasome subunit beta type;PSMA4 protein	PSMA4;PSC9;hCG_38932	P25789;B2RDG0;Q53XP2;Q7Z474;Q567Q5	1	0.627525	0.256322	0.276911	0.0503719		P25789
Nidogen-1;Entactin	NID1;NID	P14543-1;P14543;P14543-2	1	0.607537	0.172967	0.0906606	0.0505291		P14543
S-phase kinase-associated protein 1;Cyclin A/CDK2-associated protein p19;p19skp1;p19A;RNA polymerase II elongation factor-like protein;Organ of Corti protein 2;OCP-II;Transcription elongation factor B	SKP1;EMC19;OCP2;SKP1A;TCEB1L	P63208-1;P63208;P63208-2	1	0.111146	0.391037	0.19251	0.0506055		P63208
AP-3 complex subunit beta-1;Adapter-related protein complex 3 subunit beta-1;Adaptor protein complex AP-3 beta-1 subunit;Beta3A-adaptin;Clathrin assembly protein complex 3 beta-1 large chain;cDNA FLJ76822, highly similar to Homo sapiens adaptor-related protein complex 3, beta 1 subunit (AP3B1), mRNA;Adaptor-related protein complex 3 beta 1 subunit;cDNA FLJ51426, highly similar to Adapter-related …	AP3B1;ADTB3A	O00203-1;O00203;A8K586;Q3MNE1;O00203-2;B4E0B2	1	0.321402	0.702994	0.381578	0.0506113		O00203
E3 ubiquitin-protein ligase HUWE1;HECT, UBA and WWE domain-containing protein 1;Upstream regulatory element-binding protein 1;Mcl-1 ubiquitin ligase E3;ARF-binding protein 1;Large structure of UREB1;Homologous to E6AP carboxyl terminus homologous protein 9;cDNA FLJ59294, highly similar to HECT, UBA and WWE domain-containing protein 1 (EC 6.3.2.-);HECT, UBA and WWE domain containing 1;HUWE1 protein	HUWE1;KIAA0312;KIAA1578;UREB1;HSPC272;RP3-339A18.4-002;RP3-339A18.4-007	Q7Z6Z7-1;Q7Z6Z7;B4DGF6;Q7Z6Z7-3;Q7Z6Z7-2;Q5H924;Q5H962;Q8IWJ0	1	0.369284	0.320157	0.112508	0.0507415		Q7Z6Z7
Dual specificity protein phosphatase 3;Dual specificity protein phosphatase VHR;Dual specificity phosphatase 3;Dual specificity phosphatase 3 (Vaccinia virus phosphatase VH1-related);Dual specificity phosphatase 3 (Vaccinia virus phosphatase VH1-related), isoform CRA_a;DUSP3 protein	DUSP3;VHR;hCG_30287	P51452;B5BUI8;Q5U0J1;Q8IYJ9	1	0.831628	0.142004	0.19768	0.0508302		P51452
			1	0.322782	0.390105	0.108029	0.0508335
Erlin-2;Endoplasmic reticulum lipid raft-associated protein 2;Stomatin-prohibitin-flotillin-HflC/K domain-containing protein 2	ERLIN2;C8orf2;SPFH2;UNQ2441/PRO5003/PRO9924	O94905-1;O94905	1	0.360497	0.399705	0.0175834	0.0508613		O94905
Hydroxysteroid dehydrogenase-like protein 2;cDNA FLJ61200, highly similar to Homo sapiens hydroxysteroid dehydrogenase like 2 (HSDL2), mRNA;Putative uncharacterized protein HSDL2;cDNA, FLJ94174;cDNA FLJ52979, highly similar to Homo sapiens hydroxysteroid dehydrogenase like 2 (HSDL2), mRNA	HSDL2	Q6YN16-1;Q6YN16;B4E136;B5MD98;Q6YN16-2;B2R923;B4DWC7	1	1.78002	0.299643	0.296634	0.0510173		Q6YN16
Methylmalonyl-CoA mutase, mitochondrial;Methylmalonyl-CoA isomerase;cDNA, FLJ92992, highly similar to Homo sapiens methylmalonyl Coenzyme A mutase (MUT), nuclear gene encoding mitochondrial protein, mRNA;Methylmalonyl Coenzyme A mutase variant	MUT	P22033;B2R6K1;Q59HB4	1	2.69941	0.0938944	1.11077	0.0510501		P22033
Asporin;Periodontal ligament-associated protein 1;ASPN protein	ASPN;PLAP1;SLRR1C;UNQ215/PRO241	Q9BXN1;Q6P528	1	1.95765	0.536139	0.575326	0.0511684		Q9BXN1
Barrier-to-autointegration factor;Breakpoint cluster region protein 1;cDNA, FLJ92232, highly similar to Homo sapiens barrier to autointegration factor 1 (BANF1), mRNA	BANF1;BAF;BCRG1	O75531;B2R4V4	1	0.116456	0.415152	0.125499	0.0511722		O75531
Phosphatidylinositol-3,4,5-trisphosphate 5-phosphatase 2;SH2 domain-containing inositol-5'-phosphatase 2;Inositol polyphosphate phosphatase-like protein 1;Protein 51C;Inositol polyphosphate phosphatase-like 1;Inositol polyphosphate phosphatase-like 1, isoform CRA_b	INPPL1;SHIP2;hCG_23232	O15357-1;O15357;B2RTX5;O15357-2	1	0	0.602286	0	0.0513181		O15357
Alpha-aminoadipic semialdehyde synthase, mitochondrial;LKR/SDH;Lysine ketoglutarate reductase;Saccharopine dehydrogenase;Aminoadipate-semialdehyde synthase;Aminoadipate-semialdehyde synthase, isoform CRA_a;cDNA FLJ57358, highly similar to Alpha-aminoadipic semialdehyde synthase, mitochondrial	AASS;hCG_33410;tcag7.61	Q9UDR5;A4D0W4;B4DFY7	1	1.16266	0.208057	0.245065	0.0513828		Q9UDR5
39S ribosomal protein L40, mitochondrial;Nuclear localization signal-containing protein deleted in velocardiofacial syndrome;Up-regulated in metastasis;cDNA FLJ41774 fis, clone IMR322011689, highly similar to 39S ribosomal protein L40, mitochondrial;Mitochondrial ribosomal protein L40	MRPL40;NLVCF;URIM;hCG_17894	Q9NQ50;B3KVZ7	1	0.147839	0.281797	0.256064	0.0514062		Q9NQ50
Cytoskeleton-associated protein 5;Colonic and hepatic tumor over-expressed protein;Ch-TOG protein;CKAP5 protein	CKAP5;KIAA0097	Q14008-1;Q14008;Q0VAX7;Q8IYN5;Q14008-2;Q2TA89;Q6NSH4	1	0.238745	0.249173	0.221855	0.0514831		Q14008
Trifunctional purine biosynthetic protein adenosine-3;Phosphoribosylamine--glycine ligase;Glycinamide ribonucleotide synthetase;Phosphoribosylglycinamide synthetase;Phosphoribosylformylglycinamidine cyclo-ligase;Phosphoribosyl-aminoimidazole synthetase;AIR synthase;Phosphoribosylglycinamide formyltransferase;5'-phosphoribosylglycinamide transformylase;GAR transformylase;cDNA FLJ78616, highly simi…	GART;PGFT;PRGS;hCG_401180	P22102-1;P22102;A8K945;A8KA32;B4DJ93;Q15374;Q3B7A7;Q59HH3;Q71VH3;P22102-2;Q52M77	1	0.557965	0.257067	0.104234	0.051515		P22102
Isocitrate dehydrogenase [NAD] subunit alpha, mitochondrial;Isocitric dehydrogenase;NAD(+)-specific ICDH;cDNA FLJ55931, highly similar to Isocitrate dehydrogenase;Isocitrate dehydrogenase 3 (NAD+) alpha variant;cDNA FLJ52894, highly similar to Isocitrate dehydrogenase	IDH3A	P50213-1;P50213;B4DJB4;Q53GF8;B4DSY4;P50213-2	1	1.31778	0.152876	0.315313	0.0515362		P50213
DNA topoisomerase 1;DNA topoisomerase I;cDNA FLJ77890, highly similar to Homo sapiens type I DNA topoisomerase gene;Topoisomerase (DNA) I, isoform CRA_a;TOP1 protein;Putative uncharacterized protein	TOP1;hCG_38802	P11387;A8KA78;Q6NWZ5;Q6PK95;Q9BVT2	1	0.150133	0.25723	0.260038	0.0515553		P11387
Valyl-tRNA synthetase;Valine--tRNA ligase;Protein G7a;Valyl-tRNA synthetase, isoform CRA_a	VARS;DAAP-21F2.2-001;DAMC-117B11.3-001;G7A;VARS2;DADB-149K5.2-001;hCG_43695	B0V043;P26640;B0V1N1	1	0.31511	0.561315	0.292044	0.0515758		B0V043
Collagen alpha-3(VI) chain;Alpha 3 type VI collagen isoform 5 variant;Putative uncharacterized protein DKFZp686D23123;Similar to collagen, type VI, alpha 3;cDNA FLJ61583, highly similar to Collagen alpha-3(VI) chain;Putative uncharacterized protein DKFZp686K04147	COL6A3;DKFZp686D23123;DKFZp686K04147	P12111-1;P12111;P12111-2;Q59F25;Q6MZG6;Q8N4Z1;B4E3U5;Q63HQ4	1	1.28665	0.403193	0.266886	0.0516348		P12111
Ceruloplasmin;Ferroxidase;CP protein;Ceruloplasmin (Ferroxidase);Ceruloplasmin (Ferroxidase), isoform CRA_a;cDNA FLJ76826, highly similar to Homo sapiens ceruloplasmin (ferroxidase) (CP), mRNA;cDNA FLJ37971 fis, clone CTONG2009958, highly similar to CERULOPLASMIN (EC 1.16.3.1)	CP;hCG_1781201	P00450;A5PL27;A8K5A4;Q1L857;Q6NSB2;B3KTA8	1	12.0041	0.156104	6.81466	0.051853		P00450
Stress-70 protein, mitochondrial;75 kDa glucose-regulated protein;GRP 75;Heat shock 70 kDa protein 9;Peptide-binding protein 74;Mortalin;Catecholamine-regulated protein 40;Heat shock 70 kDa protein 9B;HSPA9 protein	HSPA9;GRP75;HSPA9B	P38646;A1XP52;Q2F839;Q8N1C8	1	1.4403	0.0420658	0.291722	0.052445		P38646
Acylphosphatase-2;Acylphosphate phosphohydrolase 2;Acylphosphatase, muscle type isozyme;Putative uncharacterized protein ACYP2;Acylphosphatase	ACYP2;ACYP	P14621;Q4ZFV7;Q53TK7	1	6.25	1.23961	3.85815	0.0525229		P14621
Regulator of nonsense transcripts 1;ATP-dependent helicase RENT1;Nonsense mRNA reducing factor 1;Up-frameshift suppressor 1 homolog;cDNA FLJ46894 fis, clone UTERU3019708, highly similar to Regulator of nonsense transcripts 1;PNORF1	UPF1;KIAA0221;RENT1;pNORF1	Q92900-1;Q92900;Q92900-2;B3KY55;O60385	1	0.0971634	0.398363	0.168292	0.0526492		Q92900
Protein disulfide-isomerase A3;Disulfide isomerase ER-60;ERp60;58 kDa microsomal protein;p58;ERp57;58 kDa glucose-regulated protein;cDNA PSEC0148 fis, clone PLACE1007202, highly similar to Protein disulfide-isomerase A3 (EC 5.3.4.1);cDNA PSEC0175 fis, clone OVARC1000169, highly similar to Protein disulfide-isomerase A3 (EC 5.3.4.1);cDNA FLJ59460, highly similar to Protein disulfide-isomerase A3 (…	PDIA3;ERP57;ERP60;GRP58	P30101;B3KQT2;B3KQT9;B4DDM1	1	0.319196	0.367154	0.0852168	0.0526746		P30101
Prolargin;Proline-arginine-rich end leucine-rich repeat protein;PRELP protein;Proline/arginine-rich end leucine-rich repeat protein;MSTP161	PRELP;SLRR2A;RP11-91B9.1-001;hCG_24330;MST161	P51888;Q6FG38;Q6FHG6;Q7Z4B2	1	9.0047	1.18628	5.96755	0.0527299		P51888
LIM and calponin homology domains-containing protein 1;Putative uncharacterized protein DKFZp686G03277;LIMCH1 protein	LIMCH1;KIAA1102;DKFZp686G03277	Q9UPQ0-4;Q9UPQ0;Q9UPQ0-5;Q9UPQ0-6;Q9UPQ0-9;Q6N054;Q6NVB9	1	4.76219	0.0160385	2.31928	0.0527623		Q9UPQ0
60S ribosomal protein L36;Ribosomal protein L36	RPL36;hCG_2005088	Q9Y3U8;B2R4Y1;Q9BYF3	1	0	0.613414	0	0.0529385		Q9Y3U8
Actin-related protein 2/3 complex subunit 2;Arp2/3 complex 34 kDa subunit;cDNA FLJ76076, highly similar to Homo sapiens actin related protein 2/3 complex, subunit 2, 34kDa (ARPC2), transcript variant 2, mRNA;Actin related protein 2/3 complex, subunit 2, 34kDa, isoform CRA_a;Putative uncharacterized protein ARPC2;PNAS-139	ARPC2;ARC34;PRO2446;hCG_16304	O15144;Q53R19;Q9BXV5	1	0.387171	0.389332	0.0180605	0.0529592		O15144
Prothrombin;Coagulation factor II;Activation peptide fragment 1;Activation peptide fragment 2;Thrombin light chain;Thrombin heavy chain;cDNA FLJ54622, highly similar to Prothrombin (EC 3.4.21.5);F2 protein;Prothrombin B-chain	F2	P00734;B2R7F7;B4DDT3;B4E1A7;Q15253;Q4QZ40;Q53H04;Q53H06;Q69EZ7;Q69EZ8;Q7Z7P3;Q86WA1;Q8TD58	1	2.21921	0.206971	0.542857	0.0531637		P00734
Putative uncharacterized protein ABLIM1;Actin binding LIM protein 1;cDNA FLJ16546 fis, clone PERIC2006443, highly similar to Homo sapiens actin binding LIM protein 1 (ABLIM1), transcript variant 3, mRNA;Actin-binding LIM protein 1;Actin-binding LIM protein family member 1;Actin-binding double zinc finger protein;LIMAB1;Limatin	ABLIM1;RP11-317F20.1-005;ABLIM;KIAA0059;LIMAB1;RP11-317F20.1-002;RP11-317F20.1-003;RP11-317F20.1-008	A6NCD9;Q5T6N4;A6NKJ2;B3KVH2;O14639-1;O14639;O14639-2;Q5T6N3;Q5T6N2;A8MSS6;Q5JVV3	1	1.86743	0.37896	0.236531	0.0532106		A6NCD9
Golgin B1;cDNA FLJ61596, highly similar to Golgin subfamily B member 1;Golgin subfamily B member 1;Giantin;Macrogolgin;372 kDa Golgi complex-associated protein;GCP372	GOLGB1	B2ZZ91;B4DTZ9;Q14789	1	0	0.615428	0	0.0532332		B2ZZ91
Dihydropyrimidinase-related protein 2;Collapsin response mediator protein 2;N2A3;Dihydropyrimidinase-like 2, isoform CRA_a;cDNA FLJ76838, highly similar to Homo sapiens dihydropyrimidinase-like 2 (DPYSL2), mRNA;Dihydropyrimidinase-like 2 short form;cDNA FLJ53166, highly similar to Dihydropyrimidinase-related protein 2;Dihydropyrimidinase-like 2 variant;cDNA FLJ35058 fis, clone OCBBF2018707, highl…	DPYSL2;CRMP2;hCG_17161	Q16555;A8K5H2;A9CQZ2;B4DR31;Q53ET2;Q59GB4;Q8NAN9	1	0.707046	0.0943978	0.158458	0.0532737		Q16555
Calreticulin;CRP55;Calregulin;HACBP;ERp60;grp60;cDNA FLJ53009, highly similar to Calreticulin;cDNA FLJ58668, highly similar to Calreticulin;Calreticulin variant;CALR protein;Calreticulin, isoform CRA_b	CALR;CRTC;hCG_172487	P27797;B4DHR1;B4E2Y9;Q53G71;Q6IAT4	1	0.20854	0.518755	0.0349302	0.0533075		P27797
Actin, alpha skeletal muscle;Alpha-actin-1;Actin, alpha 1, skeletal muscle;cDNA FLJ39583 fis, clone SKMUS2004897, highly similar to ACTIN, ALPHA SKELETAL MUSCLE;Putative uncharacterized protein ACTA1;Actin alpha 1 skeletal muscle protein	ACTA1;ACTA;RP5-1068B5.2-001;hCG_15512;RP5-1068B5.2-002;RP5-1068B5.2-003	P68133;Q5T8M9;B3KUD3;Q5T8M7;A6NL76;Q5T8M8;Q7Z7J6	1	19.627	1.05428	12.2721	0.0535106		P68133
Cardiomyopathy-associated protein 5;Myospryn;Dystrobrevin-binding protein 2;SPRY domain-containing protein 2;Tripartite motif-containing protein 76;Genethonin-3	CMYA5;C5orf10;DTNBP2;SPRYD2;TRIM76	Q8N3K9	1	7.59774	0.891358	3.80217	0.0536027		Q8N3K9
Peptidyl-prolyl cis-trans isomerase B;Cyclophilin B;S-cyclophilin;CYP-S1	PPIB;CYPB	P23284	1	0.158997	0.60948	0.0920052	0.0536328		P23284
Phenylalanyl-tRNA synthetase beta chain;Phenylalanine--tRNA ligase beta chain;cDNA FLJ75460, highly similar to Homo sapiens phenylalanine-tRNA synthetase-like, beta subunit, mRNA;cDNA FLJ57266, highly similar to Phenylalanyl-tRNA synthetase beta chain (EC 6.1.1.20);Phenylalanine-tRNA synthetase-like, beta subunit, isoform CRA_c;Putative uncharacterized protein FRSB;FARSB protein	FARSB;FARSLB;FRSB;HSPC173;hCG_2012454	Q9NSD9;A8K666;B4DFM0;Q4ZFX1;Q57ZJ5;Q9BR63	1	0.459146	0.409372	0.0906355	0.0536887		Q9NSD9
Ras-related protein Rab-1B;cDNA FLJ77824, highly similar to Homo sapiens RAB1B, member RAS oncogene family (RAB1B), mRNA;cDNA, FLJ96374, Homo sapiens RAB1B, member RAS oncogene family (RAB1B), mRNA;RAB1B protein;Small GTP-binding protein;Putative small GTP-binding protein (Rab1b)	RAB1B;rab1b	Q9H0U4;A8K7S1;Q6FIG4;Q92927;Q9H1C9	1	0.48423	0.187919	0.159074	0.0536988		Q9H0U4
Desmoglein-2;HDGC	DSG2;CDHF5	Q14126	1	0.503963	0.398154	0.137506	0.0539326		Q14126
cAMP-dependent protein kinase type I-alpha regulatory subunit;Tissue-specific extinguisher 1;Protein kinase, cAMP-dependent, regulatory, type I, alpha (Tissue specific extinguisher 1), isoform CRA_a;cDNA FLJ40261 fis, clone TESTI2025609, highly similar to cAMP-dependent protein kinase type I-alpha regulatory subunit;cDNA, FLJ92612, Homo sapiens protein kinase, cAMP-dependent, regulatory, type I, …	PRKAR1A;PKR1;PRKAR1;TSE1;hCG_28462;DKFZp779L0468	P10644;B2R5T5;Q68DQ4	1	0.724412	0.105331	0.0661599	0.0540296		P10644
Serine/threonine protein phosphatase;Serine/threonine-protein phosphatase 2B catalytic subunit beta isoform;Calmodulin-dependent calcineurin A subunit beta isoform;CAM-PRP catalytic subunit;Protein phosphatase from PCR H32 protein;Protein phosphatase 3 (Formerly 2B), catalytic subunit, beta isoform	PPP3CB;hCG_18332;CALNA2;CALNB;CNA2;RP11-345K20.1-002;RP11-345K20.1-003	Q8N1F0;P16298-1;P16298;P16298-3;P16298-2;Q5F2F8;Q9UMB2;Q5F2G0	1	0.236079	0.469859	0.0487499	0.054175		Q8N1F0
Platelet endothelial cell adhesion molecule;PECAM-1;EndoCAM;GPIIA';cDNA FLJ76270, highly similar to Homo sapiens platelet/endothelial cell adhesion molecule (CD31 antigen) (PECAM1), mRNA;Putative uncharacterized protein PECAM1	PECAM1	P16284-1;P16284;A8K3S7;P16284-6;P16284-2;P16284-4;P16284-3;P16284-5;B5MDK5	1	0.433236	0.299737	0.0577107	0.0542137		P16284
40S ribosomal protein S28;HCG26477;Ribosomal protein S28, isoform CRA_a;cDNA, FLJ92192, Homo sapiens ribosomal protein S28 (RPS28), mRNA	RPS28;hCG_23961;hCG_26477	P62857;B2R4R9	1	0.0530582	0.560609	0.0918995	0.0542937		P62857
Plexin-B2;MM1;Plexin B2;Putative uncharacterized protein Nbla00445	PLXNB2;KIAA0315;RP3-402G11.19-002;Nbla00445	O15031;A6QRH2;Q3LIB1	1	0.242866	0.376349	0.420656	0.0543087		O15031
3-hydroxyisobutyrate dehydrogenase, mitochondrial;3'-hydroxyisobutyrate dehydrogenase;NS5ATP1;3-hydroxyisobutyrate dehydrogenase;3-hydroxyisobutyrate dehydrogenase, isoform CRA_a;cDNA, FLJ96784, Homo sapiens 3-hydroxyisobutyrate dehydrogenase (HIBADH), mRNA	HIBADH;NS5ATP1;hCG_39034;tcag7.211	P31937;Q546Z2	1	2.28793	0.242117	0.814105	0.0547152		P31937
Phosphoribosyl pyrophosphate synthetase-associated protein 2;41 kDa phosphoribosypyrophosphate synthetase-associated protein;cDNA, FLJ93570, highly similar to Homo sapiens phosphoribosyl pyrophosphate synthetase-associated protein 2 (PRPSAP2), mRNA;cDNA FLJ52841, highly similar to Phosphoribosyl pyrophosphatesynthetase-associated protein 2;cDNA FLJ52829, highly similar to Phosphoribosyl pyrophosp…	PRPSAP2	O60256;B2R7R5;B4E329;B4E1M8	1	0.122864	0.433418	0.212806	0.0547233		O60256
High mobility group protein B1;High mobility group protein 1;High-mobility group box 1;High-mobility group box 1 variant;Putative high mobility group protein 1-like 1;High mobility group 1 protein;High mobility group protein HMG1;High mobility group protein 1-like 10;Similar to nonhistone chromosomal protein HMG-1 [Homo sapiens]; probable pseudogene; similar to P09429 (PID:g123369)	HMGB1;HMG1;RP11-550P23.1-002;RP11-550P23.1-003;HMG1L1;RP11-550P23.1-005;HMG1L10;WUGSC:H_NH0244E06.1	P09429;Q5T7C6;Q59GW1;Q5T7C4;B2RPK0;Q5T7C0;Q9NYD7;Q9UGV6;Q75MM1	1	0.295961	0.219248	0.274637	0.054751		P09429
Carboxylesterase 2;cDNA FLJ76104, highly similar to Homo sapiens carboxylesterase 2 (intestine, liver) (CES2), transcript variant 1, mRNA;Carboxylesterase 2 isoform 1 variant;CES2 protein	CES2;ICE	O00748-1;O00748;A8K367;Q53H57;O00748-2;Q4G0E9;Q6IPK9	1	3.32295	0.879587	2.29916	0.054828		O00748
60S ribosomal protein L13;Breast basic conserved protein 1;Ribosomal protein L13	RPL13;BBC1;OK/SW-cl.46;hCG_1723872	P26373;A8K4C8;B4DLX3;O60250;Q567Q8;Q6NZ55	1	0.305414	0.402086	0.1797	0.0550527		P26373
Serine/threonine-protein phosphatase 5;Protein phosphatase T;Serine/threonine protein phosphatase	PPP5C;PPP5;hCG_21093	P53041;B2R6R6;B4DDZ8;B4DLP6;Q53FR0;Q53XV2;Q9BPW0	1	0.273625	0.243532	0.298831	0.0551139		P53041
NLR family member X1;Nucleotide-binding oligomerization domain protein 5;Nucleotide-binding oligomerization domain protein 9;Nucleotide-binding oligomerization domain protein 26;Protein Caterpiller 11.3	NLRX1;NOD26;NOD5;NOD9	Q86UT6-1;Q86UT6;Q86UT6-2	1	2.77838	0.768073	0.961217	0.0553227		Q86UT6
Acylamino-acid-releasing enzyme;Acyl-peptide hydrolase;Acylaminoacyl-peptidase;Oxidized protein hydrolase	APEH;D3F15S2;D3S48E;DNF15S2	P13798	1	0.588148	0.244259	0.149172	0.05553		P13798
Alcohol dehydrogenase class-3;Alcohol dehydrogenase class-III;Alcohol dehydrogenase 5;Alcohol dehydrogenase class chi chain;S-(hydroxymethyl)glutathione dehydrogenase;Glutathione-dependent formaldehyde dehydrogenase;Alcohol dehydrogenase 5 (Class III), chi polypeptide;ADH5 protein;Alcohol dehydrogenase 5 (Class III), chi polypeptide, isoform CRA_a;cDNA, FLJ92689, highly similar to Homo sapiens al…	ADH5;ADHX;FDH;hCG_41483	P11766;Q5U043;Q6FI45;Q6IRT1;Q2VIM7	1	1.34155	0.178742	0.324217	0.0555578		P11766
Cysteine desulfurase, mitochondrial;cDNA, FLJ92597, highly similar to Homo sapiens NFS1 nitrogen fixation 1 (S. cerevisiae) (NFS1), mRNA;cDNA FLJ10608 fis, clone NT2RP2005239, highly similar to Cysteine desulfurase, mitochondrial (EC 2.8.1.7);NFS1 nitrogen fixation 1 (S. cerevisiae), isoform CRA_a;cDNA FLJ57724, highly similar to Cysteine desulfurase, mitochondrial (EC 2.8.1.7);cDNA FLJ57224, hig…	NFS1;NIFS;HUSSY-08;hCG_38220;RP1-309K20.1-003	Q9Y697-1;Q9Y697;B2R5S3;B3KMA5;B4DHP7;B4DXH0;Q53FP3;Q9Y697-2;B4DNL7;B4DXK9;Q5QP19	1	6.31717	0.460911	2.96118	0.0556175		Q9Y697
Signal recognition particle 9 kDa protein;cDNA FLJ76514, highly similar to Homo sapiens signal recognition particle 9kDa (SRP9), mRNA;HCG1781062;Signal recognition particle 9kDa, isoform CRA_a;Similar to signal recognition particle 9kD;SRP9 protein;Signal recognition particle 9 kDa isoform;Signal recognition particle 9kDa, isoform CRA_b;Putative uncharacterized protein DKFZp564M2223	SRP9;hCG_1781062;hCG_1984300;DKFZp564M2223	P49458;A8K0N0;Q8WVW9;Q6NVX0;Q8WTW0;Q659G3;Q6P2S0	1	0.0239249	0.612657	0.0414392	0.0556444		P49458
Acid ceramidase;Acylsphingosine deacylase;N-acylsphingosine amidohydrolase;Putative 32 kDa heart protein;Acid ceramidase subunit alpha;Acid ceramidase subunit beta;cDNA FLJ77858, highly similar to Homo sapiens N-acylsphingosine amidohydrolase (acid ceramidase) 1 (ASAH1), transcript variant 1, mRNA;N-acylsphingosine amidohydrolase 1;N-acylsphingosine amidohydrolase (Acid ceramidase) 1 preproprotei…	ASAH1;ASAH;HSD33;HSD-33	Q13510;A8K0B6;B1B5P6;B1B5Q0;B1B5Q9;B1B5R8;B1B5T0;B1B5T7;Q53H01;B3KUZ6;B1B5P7;B1B5R9;Q96AS2	1	3.30353	0.507484	1.28963	0.0557185		Q13510
Hypoxia up-regulated protein 1;150 kDa oxygen-regulated protein;Orp150;Oxigen-regulated protein 150;cDNA, FLJ94899, Homo sapiens hypoxia up-regulated 1 (HYOU1), mRNA;cDNA FLJ45395 fis, clone BRHIP3027191, highly similar to 150 kDa oxygen-regulated protein (Orp150);HYOU1 protein;Putative uncharacterized protein DKFZp686N08236	HYOU1;ORP150;DKFZp686N08236	Q9Y4L1;A8C1Z0;B3KXH0;Q05D91;Q68D25;Q6IN67;Q9BST8	1	0.369372	0.48213	0.218967	0.0559095		Q9Y4L1
Myopalladin;145 kDa sarcomeric protein;MYPN protein;Putative uncharacterized protein MYPN	MYPN;MYOP	Q86TC9-1;Q86TC9;A5PKT7;Q86TC9-3;Q86TC9-2;A8MZD4	1	3.15047	0.141206	1.30155	0.0563839		Q86TC9
Alpha-2-HS-glycoprotein;Ba-alpha-2-glycoprotein;Alpha-2-Z-globulin;Fetuin-A;Alpha-2-HS-glycoprotein chain A;Alpha-2-HS-glycoprotein chain B;Alpha-2-HS-glycoprotein, isoform CRA_c;cDNA, FLJ93429, Homo sapiens alpha-2-HS-glycoprotein (AHSG), mRNA	AHSG;FETUA;PRO2743;hCG_16147	P02765;A8K9N6;B2R7G1	1	0.501946	0.416736	0.115045	0.0563862		P02765
Uveal autoantigen with coiled-coil domains and ankyrin repeats;UACA protein;cDNA FLJ30873 fis, clone FEBRA2004325, moderately similar to Canis familiaris C3VS protein	UACA;KIAA1561	Q9BZF9;Q05DB3;Q96NH6	1	0	0.637413	0	0.0564725		Q9BZF9
Mimecan;Osteoglycin;Osteoinductive factor;cDNA FLJ78199, highly similar to Homo sapiens osteoglycin (osteoinductive factor, mimecan) (OGN), transcript variant 3, mRNA;Osteoglycin (Osteoinductive factor, mimecan), isoform CRA_a;cDNA PSEC0219 fis, clone HEMBA1005229, highly similar to Mimecan;cDNA FLJ59205, highly similar to Mimecan;Osteoglycin OG	OGN;OIF;SLRR3A;hCG_31130;RP11-77D6.1-003	P20774;A8K0R3;B4DI63;Q7Z532;Q5TBF5	1	0.509784	0.292594	0.148565	0.0566844		P20774
Glycogen phosphorylase, brain form;Phosphorylase	PYGB	P11216;B4DSD8;Q59GM9	1	0.547717	0.225667	0.134151	0.0566979		P11216
Nucleoside-triphosphatase C1orf57;Nucleoside triphosphate phosphohydrolase;Chromosome 1 open reading frame 57;Chromosome 1 open reading frame 57, isoform CRA_d;cDNA, FLJ95865;Chromosome 1 open reading frame 57, isoform CRA_a	C1orf57;RP4-659I19.2-001;hCG_15829;RP4-659I19.2-002	Q9BSD7;Q5TDE9;Q5TDF0	1	0.180611	0.258502	0.312828	0.0567931		Q9BSD7
Programmed cell death protein 4;Nuclear antigen H731-like;Neoplastic transformation inhibitor protein;Protein 197/15a;cDNA, FLJ92910, highly similar to Homo sapiens programmed cell death 4 (neoplastic transformation inhibitor) (PDCD4), transcript variant 1, mRNA;cDNA, FLJ96314, highly similar to Homo sapiens programmed cell death 4 (neoplastic transformation inhibitor) (PDCD4), transcript variant…	PDCD4;H731	Q53EL6;B2R6E2;B2RCV4;B4DKX4;B5ME91	1	0	0.639699	0	0.0568118		Q53EL6
MAP kinase-activated protein kinase 2;Mitogen-activated protein kinase-activated protein kinase 2;Mitogen-activated protein kinase-activated protein kinase 2, isoform CRA_e;Mitogen-activated protein kinase-activated protein kinase 2, isoform CRA_b;MAP kinase-activated protein kinase 3;Chromosome 3p kinase;cDNA FLJ78027, highly similar to Homo sapiens mitogen-activated protein kinase-activated pro…	MAPKAPK2;RP11-343H5.3-001;hCG_22205;RP11-343H5.3-002;MAPKAPK3;hCG_17458	P49137-1;P49137;Q5SY41;P49137-2;Q5SY30;Q16644;A8K4K4;B2R8Z2;B5BU67;B5BUJ8	1	0	0.639791	0	0.0568254		P49137
cDNA FLJ54776, highly similar to Cell division control protein 42 homolog;Cell division control protein 42 homolog;G25K GTP-binding protein;Putative uncharacterized protein;cDNA FLJ55107, highly similar to Cell division control protein 42 homolog;Cell division cycle 42 (GTP binding protein, 25kDa)	CDC42;RP1-224A6.5-004	B4E1U9;P60953-2;P60953;P60953-1;Q9UJM1;B4DMH5;Q5JYX0;Q9UJM0	1	0.25026	0.363085	0.263088	0.0571282		B4E1U9
Four and a half LIM domains 1 variant;Four and a half LIM domains protein 1;Skeletal muscle LIM-protein 1;cDNA FLJ16189 fis, clone BRTHA2012714, highly similar to Four and a half LIM domains protein 1;cDNA FLJ78310, highly similar to Homo sapiens four and a half LIM domains 1 (FHL1), mRNA;FHL1 protein;Four and a half LIM domains 1, isoform CRA_a;Four and a half LIM domains 1;cDNA FLJ34383 fis, cl…	FHL1;SLIM1;hCG_33097;RP11-535K18.1-007;RP11-535K18.1-008;RP11-535K18.1-012;RP11-535K18.1-006;RP11-535K18.1-003;RP11-535K18.1-011	Q53FI7;Q13642-1;Q13642;Q6IB30;Q5JXI8;Q13642-2;Q5JXI3;Q5JXH7;Q5JXH8;Q5JXI2;Q13642-3;Q5JXH9;B3KRI9	1	2.16613	0.0355727	0.718783	0.0571907		Q53FI7
Complement component C9;Complement component C9a;Complement component C9b;Complement component 9	C9	P02748;Q9UGI4	1	24.72	1.20023	14.5996	0.0572195		P02748
Mitofusin-2;Transmembrane GTPase MFN2;cDNA FLJ78432, highly similar to Homo sapiens mitofusin 2 (MFN2), mRNA;Mitofusin 2, isoform CRA_a;cDNA FLJ10327 fis, clone NT2RM2000581, highly similar to Transmembrane GTPase MFN2 (EC 3.6.5.-);cDNA FLJ12391 fis, clone MAMMA1002684, highly similar to Transmembrane GTPase MFN2 (EC 3.6.5.-);cDNA FLJ11885 fis, clone HEMBA1007203, highly similar to Transmembrane …	MFN2;CPRP1;KIAA0214;hCG_25058	O95140-1;O95140;A8K1B3;B3KM52;B3KMR3;B3KMQ0;O95140-2;A6NLD2	1	0.708526	0.264784	0.110849	0.0572693		O95140
Transcriptional repressor NF-X1;Nuclear transcription factor, X box-binding protein 1;NFX1 protein	NFX1;NFX2	Q12986-1;Q12986;Q12986-2;Q12986-3;A0JLR2	1	2.80923	0.83517	1.97111	0.0573388		Q12986
Signal recognition particle 14 kDa protein;18 kDa Alu RNA-binding protein;Signal recognition particle 14 kDa protein (Signal recognition particle 14kDa (Homologous Alu RNA binding protein), isoform CRA_a)	SRP14;hCG_1999251	P37108;B5BUF5	1	0.0672144	0.587897	0.0698784	0.0574174		P37108
Electron transfer flavoprotein subunit alpha, mitochondrial;Electron-transfer-flavoprotein, alpha polypeptide;Electron-transfer-flavoprotein, alpha polypeptide (Glutaric aciduria II);cDNA FLJ76486, highly similar to Homo sapiens electron-transfer-flavoprotein, alpha polypeptide (glutaric aciduria II) (ETFA), nuclear gene encoding mitochondrial protein, mRNA;Electron transfer flavoprotein alpha-su…	ETFA;hCG_39414	P13804;Q53XN3;B4DT43	1	1.15104	0.0794903	0.135591	0.0575196		P13804
[truncated: 1,984 more rows]
